# Supplementary material for: Organocatalytic asymmetric synthesis of benzothiazolopyrimidines via a [4 + 2] cycloaddition of azlactones with 2-benzothiazolimines
Source: Royal Society of Chemistry journal article supplement (doi:10.1039/d1qo00948f), 2021-01-01
Supplement: d1qo00948f1.pdf [file d1qo00948f1.pdf]

## Electronic Supplementary Information

### **Organocatalytic asymmetric synthesis of benzothiazolopyrimidines via [4+2] cycloaddition of azlactones with 2-benzothiazolimines**

Chaoqi Ke, Zhenzhong Liu, Sai Ruan, Xiaoming Feng and Xiaohua Liu\*

Key Laboratory of Green Chemistry & Technology, Ministry of Education, College of Chemistry,  
Sichuan University, Chengdu 610064, China.

E-mail: liuxh@scu.edu.cn

## Content

|     |                                                                   |     |
|-----|-------------------------------------------------------------------|-----|
| 1.  | General Information.....                                          | 3   |
| 2.  | General procedures for the preparation of substrates .....        | 3   |
| 3.  | General procedures for the preparation of products .....          | 3   |
| 4.  | Optimization of the reaction conditions .....                     | 4   |
| 5.  | Gram-scale synthesis .....                                        | 6   |
| 6.  | Further transformations of product.....                           | 6   |
| 7.  | X-ray diffraction analysis of the compounds 3qa, 4aa and 5aa..... | 7   |
| 8.  | Characterization of the products .....                            | 9   |
| 9.  | Copies of NMR spectra for products .....                          | 46  |
| 10. | Copies of CD spectra for products.....                            | 87  |
| 11. | Unsuccessful substrate scope.....                                 | 103 |
| 12. | Reference .....                                                   | 103 |

## 1. General Information

NMR characterization data were collected on Bruker ASCEND™ operating at 400 MHz for  $^1\text{H}$  NMR, 101 MHz for  $^{13}\text{C}$  NMR (with complete proton decoupling), and 376 MHz for  $^{19}\text{F}\{^1\text{H}\}$  NMR (with complete proton decoupling).  $^1\text{H}$  NMR and  $^{13}\text{C}$  NMR: chemical shifts  $\delta$  were recorded in ppm relative to tetramethylsilane and internally referenced to the residual solvent signal (for  $^1\text{H}$  NMR:  $\text{CDCl}_3 = 7.26$  ppm; for  $^{13}\text{C}$  NMR:  $\text{CDCl}_3 = 77.16$  ppm).  $^{19}\text{F}\{^1\text{H}\}$  NMR: chemical shifts are reported in ppm with relative to  $\text{CFCl}_3$  (external reference,  $\delta(^{19}\text{F}(\text{CFCl}_3)) = 0$ ). Data were reported as follows: chemical shift, multiplicity (s = singlet, d = doublet, t = triplet, q = quartet, dd = doublet of doublets, td = triplet of doublets, dt = doublet of triplets, ddd = doublet of doublet of doublets, m = multiplet), coupling constants (Hz), integration. Enantiomeric excesses (ee) were determined by Ultra Performance Convergence Chromatography (UPCC) on systems on Daicel Chiralcel in the experimental procedures at 35 °C. High resolution mass spectra (HRMS) were performed on Thermo Q-Exactive Focus (FTMS+c ESI) and data were reported as (m/z). Infrared spectra (IR) were recorded on Bruker Tensor II spectrometer with Plantium ATR accessory and the peaks are reported as absorption maxima ( $\nu$ ,  $\text{cm}^{-1}$ ). Circular dichroism spectrum (CD) were recorded on Applied Photophysics Chirascan. Optical rotations were measured on Rudolph Research Analytic Automatic Polarimeter, and reported as follows:  $[\alpha]_D^{25}$  (c: g/100 mL, in  $\text{CH}_2\text{Cl}_2$ ). Melting point ranges were determined on OptiMelt. X-ray crystallographic data were collected by a Bruker D8 Venture Photon II.

All catalytic reactions were run in dried glassware. THF, toluene and diethyl ether ( $\text{Et}_2\text{O}$ ) were distilled from sodium benzophenone ketyl before use. Ethyl acetate,  $\text{CH}_2\text{Cl}_2$  was distilled over  $\text{CaH}_2$  before use. The experimental substrates azlactones<sup>1</sup>, 2-benzothiazolimines<sup>2</sup>, and chiral guanidines<sup>3</sup> catalyst were synthesized according to known procedures. The starting materials were purchased from Accela, 3A chemicals, Aladdin, Adamas, Acros, Aldrich or Ark, and used without further purification. Reactions were monitored using thin-layer chromatography (TLC) on GF254 silica gel. Visualization of the developed plates was performed under UV light (254 nm) or using iodine, cobalt thiocyanate or  $\text{KMnO}_4$ . The products were purified by flash column chromatography with Silicycle 300–400 mesh silica gel.

## 2. General procedures for the preparation of substrates

### 2.1 General procedure for the synthesis of azlactones according to the literature procedure.<sup>1</sup>

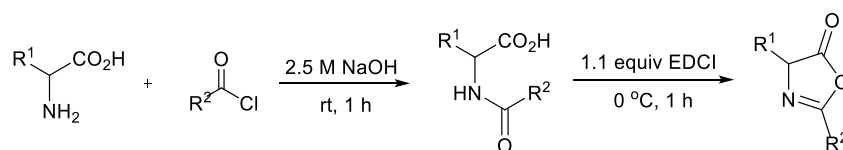

### 2.2 General procedure for the synthesis of 2-benzothiazolimines.<sup>2</sup>

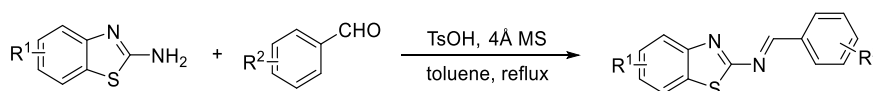

To a 100 mL oven-dried round-bottom flask were added 2-aminobenzothiazole (1.5 g, 10 mmol), 4 Å molecular sieves (1.0 g), and toluene (20 mL). The mixture was refluxed for 0.5 h, then benzaldehyde (1.1 eq, 11 mmol) was added. The mixture was refluxed for 2–4 h (monitored by TLC). After the complete conversion of starting material, the mixture was filtered and the filtrate was concentrated under reduced pressure. The residue was further recrystallized by n-hexane/ethyl acetate to give the desired 2-benzothiazolimine.

## 3. General procedures for the preparation of products

**General procedure for the synthesis of racemic product:** In a dry tube was charged with the DABCO (20 mol%), **1** (0.10 mmol), and **2** (0.10 mmol) in THF (0.5 mL). The reaction was stirred at r.t. and monitored by TLC. After the complete conversion of starting material, the solvent was removed under reduced pressure, and then the mixture was purified by column chromatography (petroleum ether/ethyl acetate = 5/1, v/v) to afford the product **3**.

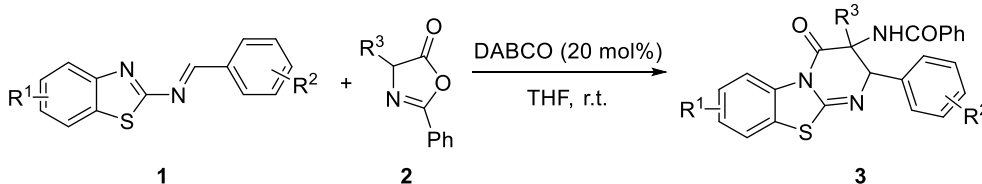

**Typical procedure for the asymmetric reaction:** In a dry tube was charged with the **G-2** (2 mol%), 5 Å MS (10 mg), **1** (0.10 mmol), and **2** (0.10 mmol). Under  $\text{N}_2$  atmosphere, the mixture was stirred at  $-50$  °C for 10 min, and then 2-methyltetrahydrofuran was added.

Next the mixture was stirred at  $-50\text{ }^{\circ}\text{C}$  and monitored by TLC until completion of the reaction. The mixture was purified by column chromatography (petroleum ether/ethyl acetate = 5/1, v/v) to afford the product **3**.

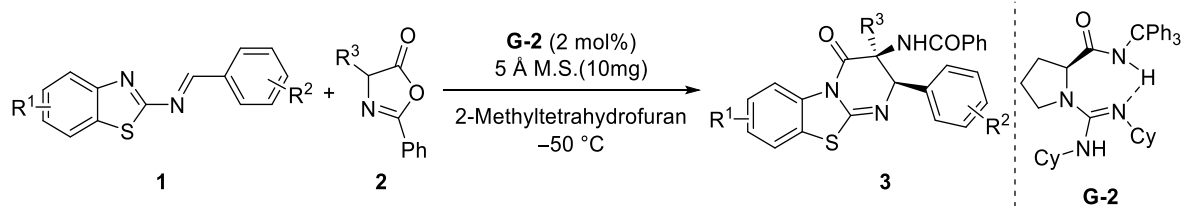

#### 4. Optimization of the reaction conditions

**Table S1.** Screening of the chiral guanidines <sup>[a]</sup>

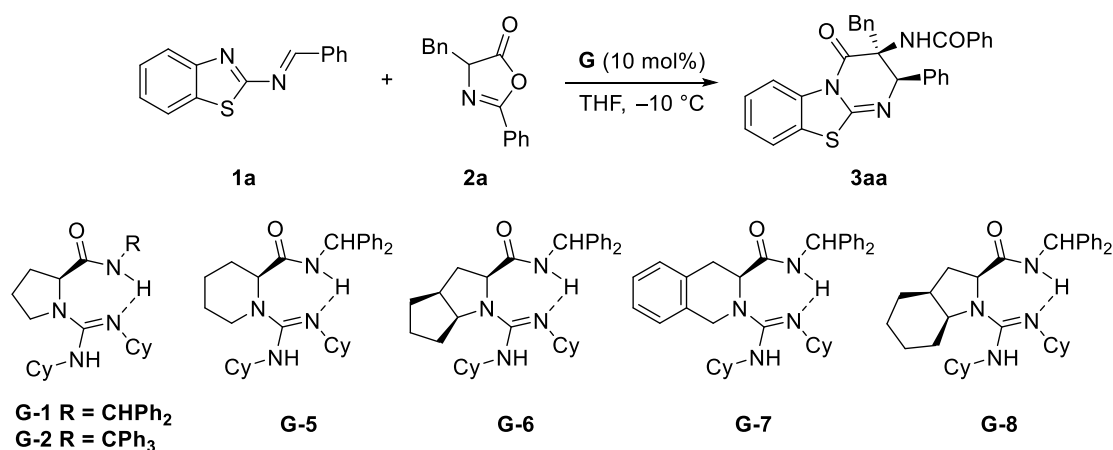

| entry | guanidine  | yield (%) | ee (%) | d.r.  |
|-------|------------|-----------|--------|-------|
| 1     | <b>G-1</b> | 92        | 0      | 85:15 |
| 2     | <b>G-2</b> | 88        | 35     | 82:18 |
| 3     | <b>G-5</b> | 90        | 32     | 94:6  |
| 4     | <b>G-6</b> | 51        | 22     | 74:26 |
| 5     | <b>G-7</b> | 97        | 0      | >19:1 |
| 5     | <b>G-8</b> | 93        | 20     | 82:18 |

[a] The reactions were carried out with **1a** (0.10 mmol), **2a** (0.10 mmol) and **G** (10 mol%) in THF (0.5 mL) under N<sub>2</sub> at  $-10\text{ }^{\circ}\text{C}$  for 16 h. Isolated yield, ee and d.r. values were determined by UPCC analysis.

**Table S2.** Screening of the temperature <sup>[a]</sup>

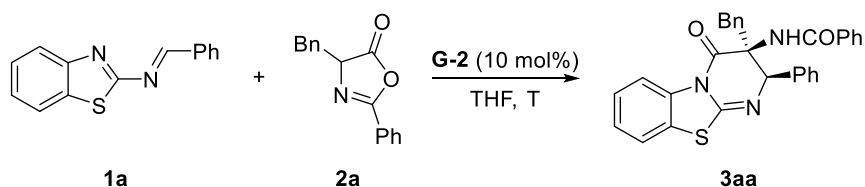

| entry | T (°C) | yield (%) | ee (%) | d.r.  |
|-------|--------|-----------|--------|-------|
| 1     | $-20$  | 94        | 68     | 92:8  |
| 2     | $-30$  | 87        | 82     | 95:5  |
| 3     | $-40$  | 94        | 89     | >19:1 |
| 4     | $-50$  | 97        | 90     | >19:1 |
| 5     | $-60$  | 75        | 93     | >19:1 |

[a] The reactions were carried out with **1a** (0.10 mmol), **2a** (0.10 mmol) and **G-2** (10 mol%) in THF (0.5 mL) under N<sub>2</sub> for 16 h. Isolated yield, ee and d.r. values were determined by UPCC analysis.

**Table S3.** Screening of the additives<sup>[a]</sup>

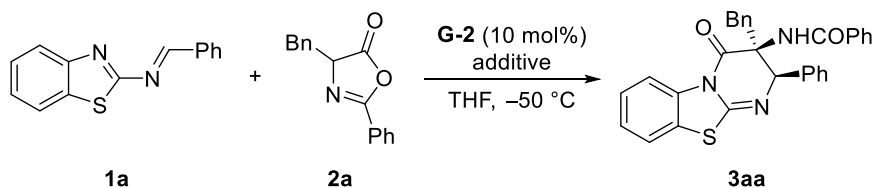

| entry | additive      | yield (%) | ee (%) | d.r.  |
|-------|---------------|-----------|--------|-------|
| 1     | 3Å MS (10 mg) | 93        | 92     | >19:1 |
| 2     | 4Å MS (10 mg) | 97        | 92     | >19:1 |
| 3     | 5Å MS (10 mg) | 99        | 93     | >19:1 |

[a] The reactions were carried out with **1a** (0.10 mmol), **2a** (0.10 mmol), additive and **G-2** (10 mol%) in THF (0.5 mL) under N<sub>2</sub> at -50 °C for 3 h. Isolated yield, ee and d.r. values were determined by UPCC analysis.

**Table S4.** Screening of the solvents<sup>[a]</sup>

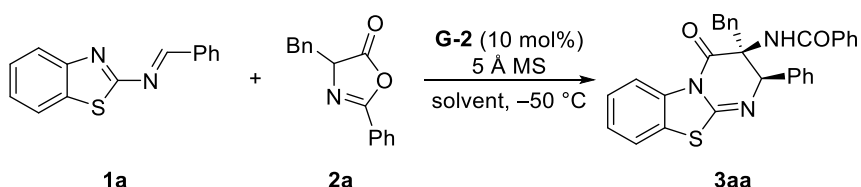

| entry | solvent                         | yield (%) | ee (%) | d.r.  |
|-------|---------------------------------|-----------|--------|-------|
| 1     | THF                             | 99        | 93     | >19:1 |
| 2     | CH <sub>2</sub> Cl <sub>2</sub> | 92        | 93     | >19:1 |
| 3     | Et <sub>2</sub> O               | 99        | 89     | >19:1 |
| 4     | Toluene                         | 97        | 89     | >19:1 |
| 5     | EA                              | 98        | 92     | >19:1 |
| 6     | MTHF                            | 95        | 95     | >19:1 |

[a] The reactions were carried out with **1a** (0.10 mmol), **2a** (0.10 mmol), 5Å MS (10 mg) and **G-2** (10 mol%) in solvent (0.5 mL) under N<sub>2</sub> at -50 °C for 3 h. Isolated yield, ee and d.r. values were determined by UPCC analysis. MTHF = 2-Methyltetrahydrofuran.

**Table S5.** Screening of the chiral guanidines<sup>[a]</sup>

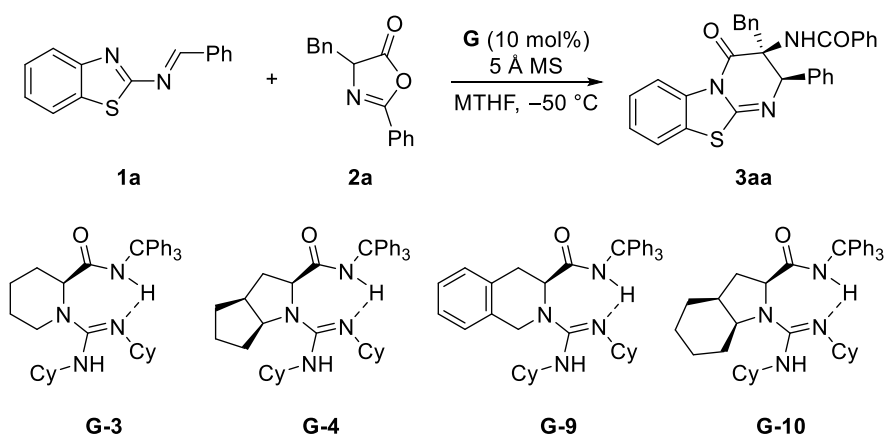

| entry | guanidine   | yield (%) | ee (%) | d.r. |
|-------|-------------|-----------|--------|------|
| 1     | <b>G-3</b>  | 99        | 92     | 96:4 |
| 2     | <b>G-4</b>  | 84        | 84     | 93:7 |
| 3     | <b>G-9</b>  | 83        | 26     | 97:3 |
| 4     | <b>G-10</b> | 89        | 86     | 95:5 |

[a] The reactions were carried out with **1a** (0.10 mmol), **2a** (0.10 mmol) and **G** (10 mol%) in MTHF (0.5 mL) under N<sub>2</sub> at -50 °C for 3 h. Isolated yield, ee and d.r. values were determined by UPCC analysis.

**Table S6.** Screening of the catalyst loading [a]

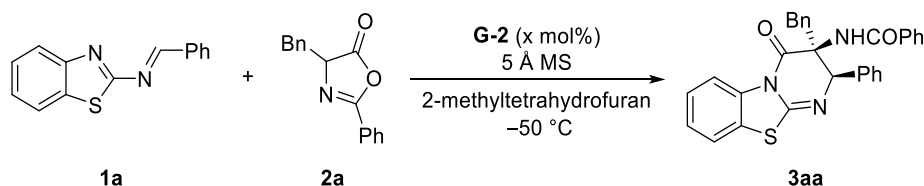

| entry            | x | yield (%) | ee (%) | d.r.  |
|------------------|---|-----------|--------|-------|
| 1                | 5 | 99        | 96     | >19:1 |
| 2                | 2 | 92        | 97     | >19:1 |
| 3 <sup>[b]</sup> | 1 | 91        | 90     | 95:5  |

[a] The reactions were carried out with **1a** (0.10 mmol), **2a** (0.10 mmol), 5 Å MS (10 mg) and **G-2** (10 mol%) in 2-methyltetrahydrofuran (0.5 mL) under N<sub>2</sub> at -50 °C for 3 h. Isolated yield, ee and d.r. values were determined by UPCC analysis. [b] 0.1 mL 2-methyltetrahydrofuran.

## 5. Gram-scale synthesis

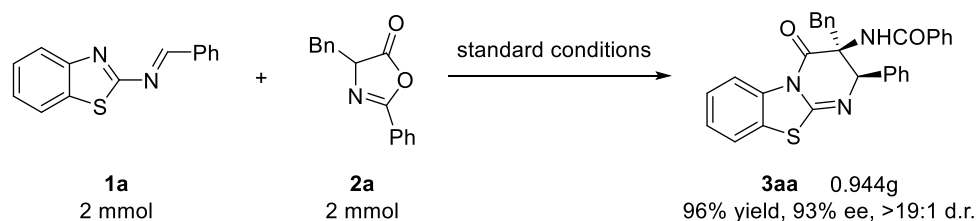

To a 50 mL oven-dried round-bottom flask was charged with the **G-2** (2 mol%), **1a** (2.0 mmol), and **2a** (2.0 mmol). Under N<sub>2</sub> atmosphere, the mixture was stirred at -50 °C for 30 min, and then 2-methyltetrahydrofuran (10 mL) was added. Next the mixture was stirred at -50 °C and monitored by TLC until completion of the reaction. The solvent was removed under reduced pressure, and the mixture was purified by column chromatography to afford the product **3aa**.

## 6. Further transformations of product

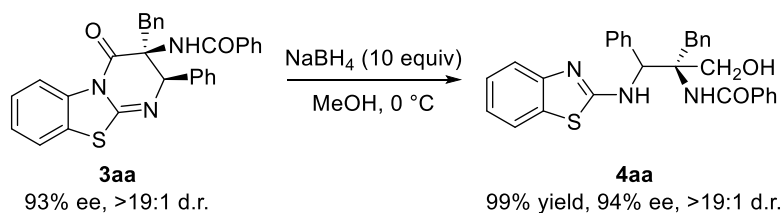

To a solution of **3aa** (0.10 mmol) in MeOH (1.0 mL) was added NaBH<sub>4</sub> (10.0 equiv) at 0 °C. After stirring for 30 minutes at 0 °C, the reaction mixture was quenched with brine and the mixture was diluted with dichloromethane. The combined organic layers were washed with brine, dried over Na<sub>2</sub>SO<sub>4</sub>, evaporated in vacuo, and was subjected to flash column chromatography on silica gel (petroleum ether/ethyl acetate = 3/1) to give product **4aa**.

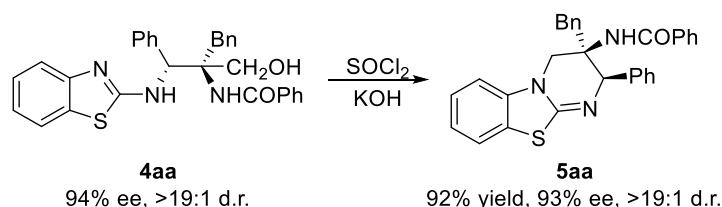

Thionyl chloride (0.06 mL, 0.81 mmol, 2.2 equiv) was added to a stirred solution of **4aa** (181 mg, 0.367 mmol) in toluene (5 mL) and the reaction mixture was heated to reflux for 4h. Once complete the mixture was allowed to cool to rt and evaporated the solvent. MeOH (5 mL) and KOH was added to the residue and stirred overnight, followed by extraction with CH<sub>2</sub>Cl<sub>2</sub>. The combined organic extracts were washed with brine, dried over Na<sub>2</sub>SO<sub>4</sub>, evaporated in vacuo, and was subjected to flash column chromatography on silica gel (petroleum ether/ethyl acetate = 3/1) to give product **5aa**.

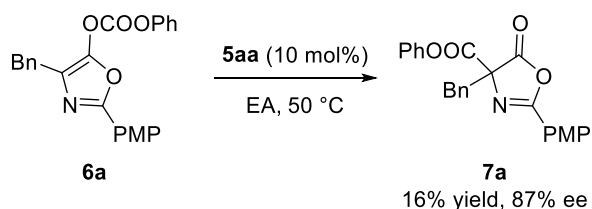

In a dry tube was charged with the **5aa** (93% ee, 10 mol%), **6a** (0.10 mmol). Under N<sub>2</sub> atmosphere EA (0.5 mL) was added. Next the mixture was stirred at 50 °C for 24h. The solvent was removed under reduced pressure, and the mixture was purified by column chromatography (petroleum ether/ethyl acetate = 10/1, v/v) to afford the product **7a**.

## 7. X-ray diffraction analysis of the compounds 3qa, 4aa and 5aa

Crystals suitable for the X-ray crystal structure analysis were obtained from a solution of compound **3qa** in DCM and petroleum ether at r.t.. The colourless crystal in block-shape, with approximate dimensions of 0.558 × 0.315 × 0.256 mm<sup>3</sup>, was selected and mounted for the single-crystal X-ray diffraction. The data set was collected by Bruker D8 Venture Photon II diffractometer at 173(2)K equipped with micro-focus Mo radiation source ( $K_{\alpha} = 0.71073\text{\AA}$ ).

Crystals suitable for the X-ray crystal structure analysis were obtained from a solution of compound **4aa** in MeOH at r.t.. The colourless crystal in rod-shape, with approximate dimensions of 0.276 × 0.107 × 0.072 mm<sup>3</sup>, was selected and mounted for the single-crystal X-ray diffraction. The data set was collected by Bruker D8 Venture Photon II diffractometer at 293(2)K equipped with micro-focus Cu radiation source ( $K_{\alpha} = 1.54178\text{\AA}$ ).

Crystals suitable for the X-ray crystal structure analysis were obtained from a solution of compound **5aa** in CDCl<sub>3</sub> at r.t.. The colourless crystal in block-shape, with approximate dimensions of 0.068 × 0.127 × 0.181 mm<sup>3</sup>, was selected and mounted for the single-crystal X-ray diffraction. The data set was collected by Bruker D8 Venture Photon II diffractometer at 172(2)K equipped with micro-focus Cu radiation source ( $K_{\alpha} = 1.54178\text{\AA}$ ).

Applied with face-indexed numerical absorption correction, the structure solution was solved and refinement was processed by SHELXTL (version 6.14) and OLEX 2.3 program package<sup>a, b, c, d</sup>. The structure was analyzed by ADDSYM routine implemented in PLATON suite and no higher symmetry was suggested<sup>e</sup>.

### References:

- <sup>a</sup> Sheldrick, G. M. *Acta Cryst.* **2008**, A64, 112–122.  
<sup>b</sup> Sheldrick, G. M. *Acta Cryst.* **2015**, A71, 3–8.  
<sup>c</sup> Sheldrick, G. M. *Acta Cryst.* **2015**, C71, 3–8.  
<sup>d</sup> Dolomanov, O.V., Bourhis, L. J., Gildea, R.J., Howard, J. A. K., Puschmann, H. *J. Appl. Cryst.* **2009**, 42, 339-341.  
<sup>e</sup> Spek, A. L. *J. Appl. Cryst.* **2003**, 36, 7–13.

The crystal data and further details are listed in **Table S7**. CCDC **2050053**, **2070880** and **2081453** which contain the crystallographic data for the structure have been deposited with the Cambridge Crystallographic Data Centre (CCDC), 12 Union Road, Cambridge CB2 1EZ, UK, which can be obtained free of charge via Fax: +44 (0)1223 336033; E-Mail: deposit@ccdc.cam.ac.uk, <https://www.ccdc.cam.ac.uk/structures/>.

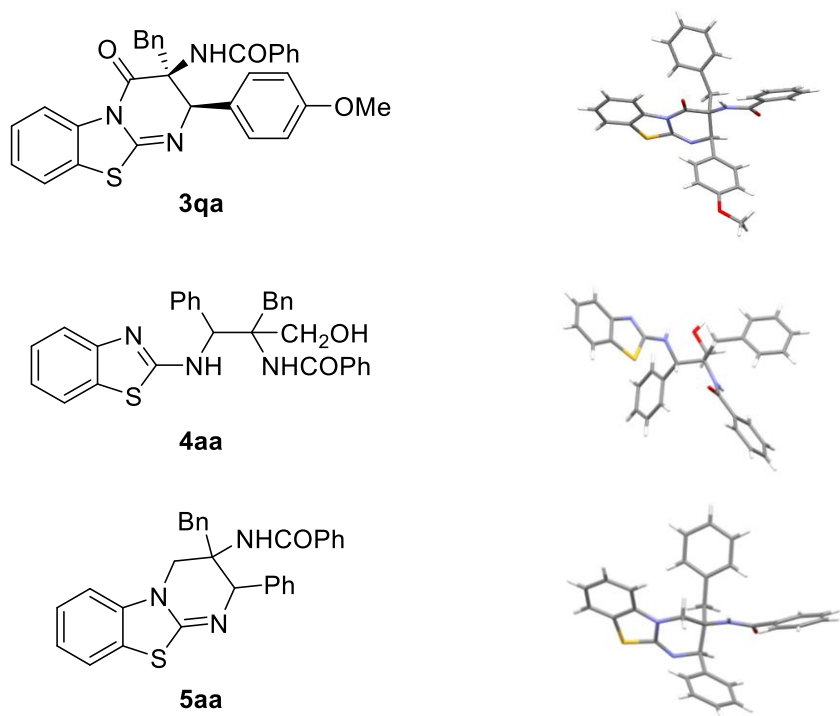

**Table S7.** The crystal data and further details.

| compound                                                        | <b>3qa</b>                                                      | <b>4aa</b>                                                      | <b>5aa</b>                                                      |
|-----------------------------------------------------------------|-----------------------------------------------------------------|-----------------------------------------------------------------|-----------------------------------------------------------------|
| Formula                                                         | C <sub>31</sub> H <sub>25</sub> N <sub>3</sub> O <sub>3</sub> S | C <sub>30</sub> H <sub>27</sub> N <sub>3</sub> O <sub>2</sub> S | C <sub>30</sub> H <sub>25</sub> N <sub>3</sub> O <sub>3</sub> S |
| Formula mass (amu)                                              | 519.60                                                          | 493.60                                                          | 475.59                                                          |
| Space group                                                     | P2 <sub>1</sub> 2 <sub>1</sub> 2 <sub>1</sub>                   | I 41/a                                                          | P 21/c                                                          |
| <i>a</i> (Å)                                                    | 9.6781(3)                                                       | 22.4794(6)                                                      | 12.3607(3)                                                      |
| <i>b</i> (Å)                                                    | 14.9062(5)                                                      | 22.4794(6)                                                      | 21.8106(5)                                                      |
| <i>c</i> (Å)                                                    | 17.7734(6)                                                      | 20.5397(8)                                                      | 10.8466(3)                                                      |
| $\alpha$ (deg)                                                  | 90                                                              | 90                                                              | 90                                                              |
| $\beta$ (deg)                                                   | 90                                                              | 90                                                              | 113.912(1)                                                      |
| $\gamma$ (deg)                                                  | 90                                                              | 90                                                              | 90                                                              |
| <i>V</i> (Å <sup>3</sup> )                                      | 2564.06(15)                                                     | 10379.2(7)                                                      | 2673.20(12)                                                     |
| <i>Z</i>                                                        | 4                                                               | 16                                                              | 4                                                               |
| $\lambda$ (Å)                                                   | 0.71073                                                         | 1.54178                                                         | 1.54178                                                         |
| <i>T</i> (K)                                                    | 173 K                                                           | 293 K                                                           | 172 K                                                           |
| $\rho_{\text{calcd}}$ (g cm <sup>-3</sup> )                     | 1.346                                                           | 1.264                                                           | 1.182                                                           |
| $\mu$ (mm <sup>-1</sup> )                                       | 0.165                                                           | 1.358                                                           | 1.273                                                           |
| Transmission factors                                            | 0.879–0.998                                                     | 0.764–0.997                                                     | 0.796–0.952                                                     |
| $2\theta_{\text{max}}$ (deg)                                    | 25.349                                                          | 68.301                                                          | 68.308                                                          |
| No. of unique data, including $F_o^2 < 0$                       | 4693                                                            | 4739                                                            | 4781                                                            |
| No. of unique data, with $F_o^2 > 2\sigma(F_o^2)$               | 4238                                                            | 4134                                                            | 4111                                                            |
| No. of variables                                                | 348                                                             | 337                                                             | 321                                                             |
| <i>R</i> ( <i>F</i> ) for $F_o^2 > 2\sigma(F_o^2)$ <sup>a</sup> | 0.0311                                                          | 0.0432                                                          | 0.0557                                                          |
| <i>R</i> <sub>w</sub> ( $F_o^2$ ) <sup>b</sup>                  | 0.0740                                                          | 0.1096                                                          | 0.1334                                                          |
| Goodness of fit                                                 | 1.065                                                           | 1.030                                                           | 1.031                                                           |

<sup>a</sup>  $R(F) = \sum ||F_o| - |F_c|| / \sum |F_o|$ .

<sup>b</sup>  $R_w(F_o^2) = [\sum w(F_o^2 - F_c^2)^2] / \sum wF_o^4]^{1/2}$ ;  $w^{-1} = [\sigma^2(F_o^2) + (Ap)^2 + Bp]$ , where  $p = [\max(F_o^2, 0) + 2F_c^2] / 3$ .



## 8. Characterization of the products

### *N*-((2*R*,3*S*)-3-benzyl-4-oxo-2-phenyl-3,4-dihydro-2*H*-benzo[4,5]thiazolo[3,2-*a*]pyrimidin-3-yl)benzamide (3aa)

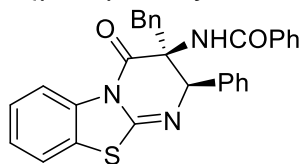

White solid; m.p. 90–95 °C; 45.2 mg, 92% yield, 97% ee, >19:1 d.r.;  $[\alpha]_D^{22} = +451.36$  ( $c = 5.50$  in  $\text{CH}_2\text{Cl}_2$ ).

**UPCC** (chiral AS-3 column),  $\text{CO}_2/\text{MeOH} = 90/10$ , flow rate = 1.5 mL/min,  $\lambda = 215$  nm,  $t_R$  (minor) = 4.59 min,  $t_R$  (major) = 5.22 min.

**IR** (neat): 3401, 1643, 1460, 1368 and 1184  $\text{cm}^{-1}$ .

**$^1\text{H}$  NMR** (400 MHz,  $\text{CDCl}_3$ )  $\delta = 8.07 - 8.00$  (m, 1H), 7.48 – 7.42 (m, 4H), 7.37 – 7.31 (m, 4H), 7.29 – 7.25 (m, 2H), 7.22 – 7.16 (m, 4H), 7.15 – 7.10 (m, 2H), 6.93 – 6.87 (m, 3H), 6.14 (s, 1H), 4.37 (d,  $J = 14.0$  Hz, 1H), 3.50 (d,  $J = 14.0$  Hz, 1H).

**$^{13}\text{C}$  NMR** (101 MHz,  $\text{CDCl}_3$ )  $\delta = 167.9, 167.8, 153.8, 135.9, 135.2, 134.9, 134.8, 131.7, 130.1, 128.8, 128.7, 128.6, 128.4, 127.5, 127.3, 127.0, 126.8, 126.4, 123.6, 122.4, 115.9, 67.7, 64.9, 39.7$ .

**HRMS** (ESI-FT) calcd for  $\text{C}_{30}\text{H}_{24}\text{N}_3\text{O}_2\text{S}^+$  ( $[\text{M}+\text{H}^+]$ ) = 490.1584, Found 490.1585.

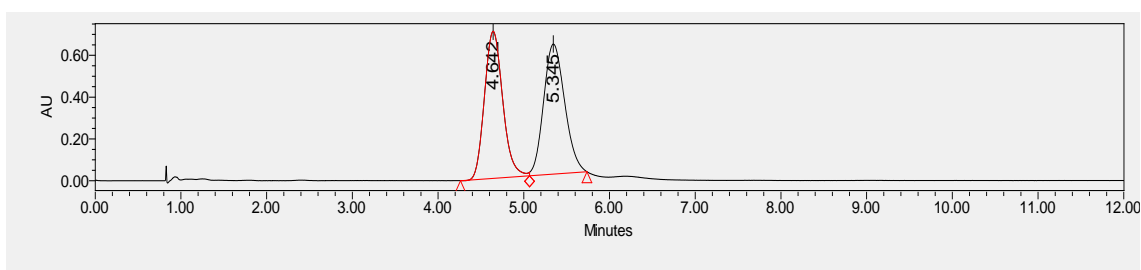

|   | Retention Time | Area     | % Area |
|---|----------------|----------|--------|
| 1 | 4.642          | 10416094 | 49.48  |
| 2 | 5.345          | 10633959 | 50.52  |

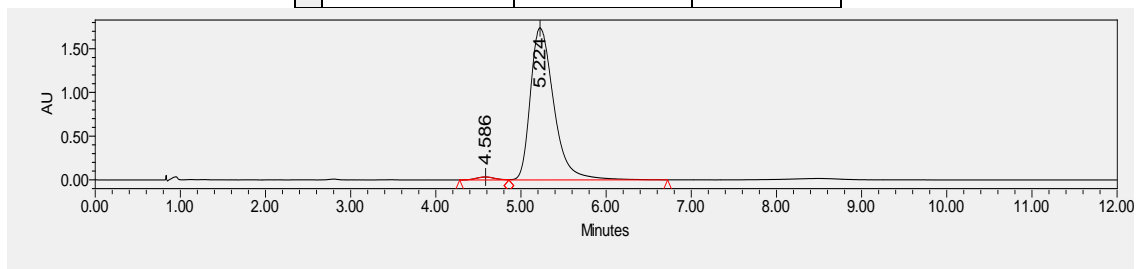

|   | Retention Time | Area     | % Area |
|---|----------------|----------|--------|
| 1 | 4.586          | 510434   | 1.51   |
| 2 | 5.224          | 33207114 | 98.49  |

***N*-((2*R*,3*S*)-3-benzyl-8-fluoro-4-oxo-2-phenyl-3,4-dihydro-2*H*-benzo[4,5]thiazolo[3,2-*a*]pyrimidin-3-yl)benzamide (3ba)**

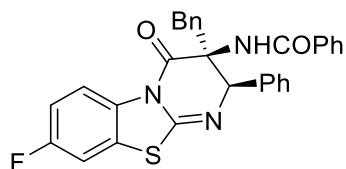

White solid; m.p. 95–98 °C; 51.5 mg, 99% yield, 94% ee, >19:1 d.r.;  $[\alpha]_D^{21} = +428.04$  ( $c = 0.94$  in  $\text{CH}_2\text{Cl}_2$ ).

**UPCC** (chiral OJH column),  $\text{CO}_2/\text{MeOH} = 80/20$ , flow rate = 1.0 mL/min,  $\lambda = 218$  nm,  $t_R$  (major) = 5.88 min,  $t_R$  (minor) = 6.45 min.

**IR** (neat): 3405, 1651, 1474, 1372 and 1228  $\text{cm}^{-1}$ .

**$^1\text{H}$  NMR** (400 MHz,  $\text{CDCl}_3$ )  $\delta = 8.03 - 7.97$  (m, 1H), 7.48 – 7.43 (m, 3H), 7.37 – 7.32 (m, 2H), 7.28 – 7.24 (m, 2H), 7.23 – 7.19 (m, 4H), 7.19 – 7.17 (m, 1H), 7.15 – 7.10 (m, 2H), 7.05 – 6.99 (m, 1H), 6.91 – 6.86 (m, 3H), 6.15 (s, 1H), 4.37 (d,  $J = 14.0$  Hz, 1H), 3.48 (d,  $J = 14.0$  Hz, 1H).

**$^{13}\text{C}$  NMR** (101 MHz,  $\text{CDCl}_3$ )  $\delta = 167.8, 167.6, 160.6$  (d,  $J = 247.5$  Hz), 153.4, 135.7, 135.1, 134.8, 131.7, 131.1 (d,  $J = 2.6$  Hz), 130.1, 128.8, 128.7, 128.6, 128.4, 127.6, 127.2, 126.8, 125.4 (d,  $J = 9.8$  Hz), 117.0 (d,  $J = 8.4$  Hz), 113.8 (d,  $J = 23.1$  Hz), 110.0 (d,  $J = 27.5$  Hz), 67.8, 64.8, 39.7.

**$^{19}\text{F}\{^1\text{H}\}$  NMR** (376 MHz,  $\text{CDCl}_3$ )  $\delta = -113.8$ .

**HRMS** (ESI-FT) calcd for  $\text{C}_{30}\text{H}_{23}\text{FN}_3\text{O}_2\text{S}^+$  ( $[\text{M}+\text{H}^+]$ ) = 508.1490, Found 508.1490.

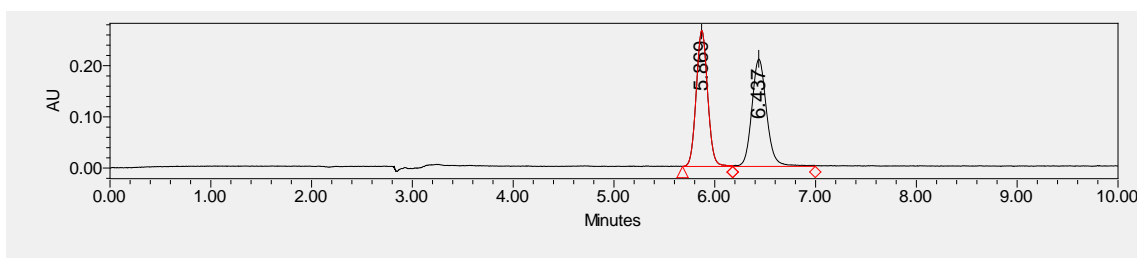

|   | Retention Time | Area    | % Area |
|---|----------------|---------|--------|
| 1 | 5.869          | 2084281 | 49.39  |
| 2 | 6.437          | 2135404 | 50.61  |

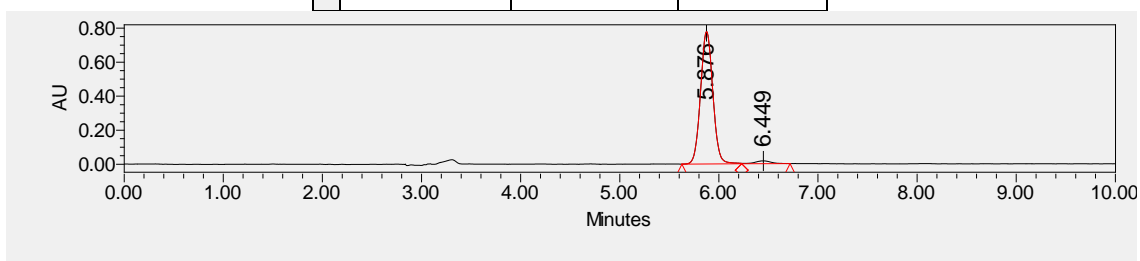

|   | Retention Time | Area    | % Area |
|---|----------------|---------|--------|
| 1 | 5.876          | 6692970 | 97.24  |
| 2 | 6.449          | 189836  | 2.76   |

***N*-((2*R*,3*S*)-3-benzyl-8-chloro-4-oxo-2-phenyl-3,4-dihydro-2*H*-benzo[4,5]thiazolo[3,2-*a*]pyrimidin-3-yl)benzamide (3ca)**

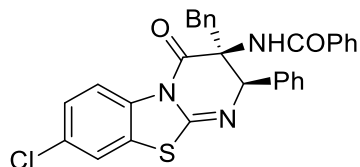

White solid; m.p. 105–110 °C; 50.1 mg, 96% yield, 92% ee, >19:1 d.r.;  $[\alpha]_D^{21} = +320.36$  ( $c = 0.71$  in  $\text{CH}_2\text{Cl}_2$ ).

**UPCC** (chiral OJH column),  $\text{CO}_2/\text{MeOH} = 80/20$ , flow rate = 1.0 mL/min,  $\lambda = 236$  nm,  $t_R$  (major) = 7.68 min,  $t_R$  (minor) = 9.74 min.

**IR** (neat): 3405, 1650, 1462, 1369 and 1186  $\text{cm}^{-1}$ .

**$^1\text{H NMR}$**  (400 MHz,  $\text{CDCl}_3$ )  $\delta = 7.96 - 7.92$  (m, 1H), 7.47 – 7.42 (m, 4H), 7.36 – 7.31 (m, 2H), 7.30 – 7.26 (m, 1H), 7.26 – 7.23 (m, 2H), 7.22 – 7.17 (m, 4H), 7.15 – 7.10 (m, 2H), 6.90 – 6.85 (m, 3H), 6.14 (s, 1H), 4.36 (d,  $J = 14.0$  Hz, 1H), 3.46 (d,  $J = 14.0$  Hz, 1H).

**$^{13}\text{C NMR}$**  (101 MHz,  $\text{CDCl}_3$ )  $\delta = 167.8, 167.7, 153.0, 135.6, 135.1, 134.8, 133.3, 131.9, 131.8, 130.0, 128.9, 128.7, 128.7, 128.5, 127.6, 127.2, 127.1, 126.8, 125.4, 122.3, 116.7, 67.8, 64.9, 39.7$ .

**HRMS** (ESI-FT) calcd for  $\text{C}_{30}\text{H}_{23}^{35}\text{ClN}_3\text{O}_2\text{S}^+$  ( $[\text{M}+\text{H}^+]$ ) = 524.1194, Found 524.1196,  $\text{C}_{30}\text{H}_{23}^{37}\text{ClN}_3\text{O}_2\text{S}^+$  ( $[\text{M}+\text{H}^+]$ ) = 526.1165, Found 526.1169.

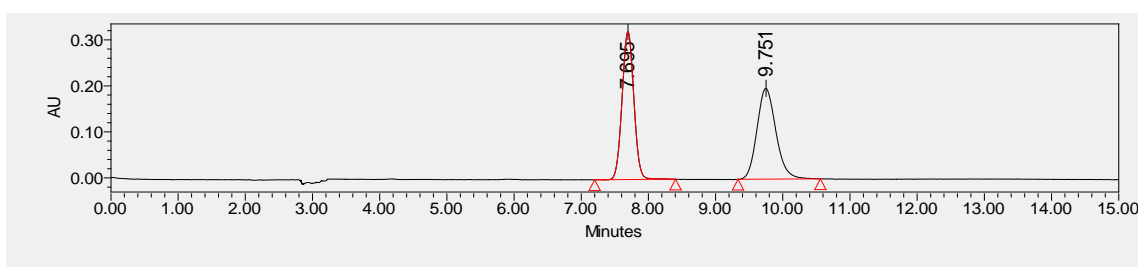

|   | Retention Time | Area    | % Area |
|---|----------------|---------|--------|
| 1 | 7.695          | 3893537 | 50.22  |
| 2 | 9.751          | 3859140 | 49.78  |

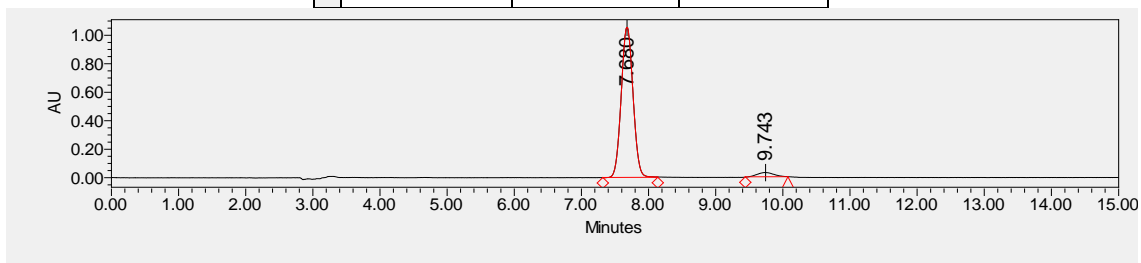

|   | Retention Time | Area     | % Area |
|---|----------------|----------|--------|
| 1 | 7.680          | 12828434 | 96.19  |
| 2 | 9.743          | 508285   | 3.81   |

***N*-((2*R*,3*S*)-3-benzyl-8-bromo-4-oxo-2-phenyl-3,4-dihydro-2*H*-benzo[4,5]thiazolo[3,2-*a*]pyrimidin-3-yl)benzamide (3da)**

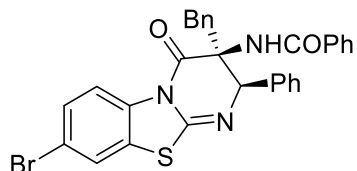

White solid; m.p. 110–114 °C; 53.5 mg, 94% yield, 87% ee, 93:7 d.r.;  $[\alpha]_D^{21} = +343.28$  ( $c = 0.82$  in  $\text{CH}_2\text{Cl}_2$ ).

**UPCC** (chiral OJH column),  $\text{CO}_2/\text{MeOH} = 80/20$ , flow rate = 1.0 mL/min,  $\lambda = 218$  nm,  $t_R$  (major) = 9.24 min,  $t_R$  (minor) = 12.88 min.

**IR** (neat): 3405, 1651, 1460, 1369 and 1186  $\text{cm}^{-1}$ .

**$^1\text{H NMR}$**  (400 MHz,  $\text{CDCl}_3$ )  $\delta = 7.92 - 7.81$  (m, 1H), 7.67 – 7.57 (m, 1H), 7.55 – 7.42 (m, 4H), 7.38 – 7.31 (m, 2H), 7.28 – 7.24 (m, 2H), 7.23 – 7.17 (m, 4H), 7.17 – 7.11 (m, 2H), 6.91 – 6.80 (m, 3H), 6.15 (s, 1H), 4.38 (d,  $J = 14.0$  Hz, 1H), 3.47 (d,  $J = 14.0$  Hz, 1H).

**$^{13}\text{C NMR}$**  (101 MHz,  $\text{CDCl}_3$ )  $\delta = 167.8, 167.7, 153.0, 135.6, 135.0, 134.7, 133.8, 131.8, 130.0, 128.9, 128.7, 128.7, 128.5, 127.6, 127.2, 126.8, 125.6, 125.1, 119.2, 117.0, 67.7, 64.9, 39.6$ .

**HRMS** (ESI-FT) calcd for  $\text{C}_{30}\text{H}_{23}^{79}\text{BrN}_3\text{O}_2\text{S}^+$  ( $[\text{M}+\text{H}^+]$ ) = 568.0689, Found 568.0691,  $\text{C}_{30}\text{H}_{23}^{81}\text{Br N}_3\text{O}_2\text{S}^+$  ( $[\text{M}+\text{H}^+]$ ) = 570.0668, Found 570.0670.

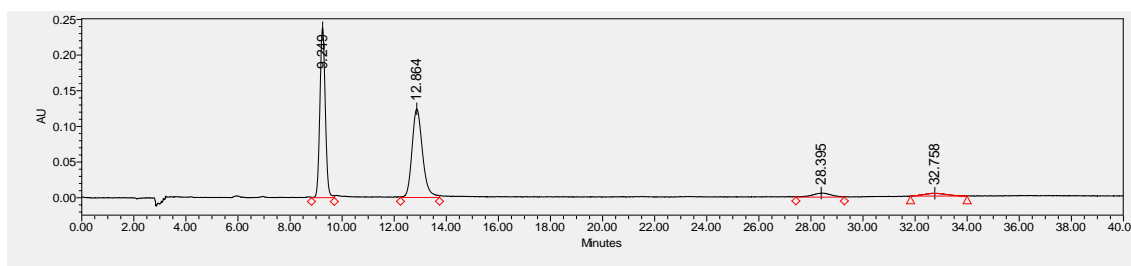

|   | Retention Time | Area    | % Area |
|---|----------------|---------|--------|
| 1 | 9.249          | 3405649 | 46.10  |
| 2 | 12.864         | 3462178 | 46.87  |
| 3 | 28.395         | 288316  | 3.90   |
| 4 | 32.758         | 231174  | 3.13   |

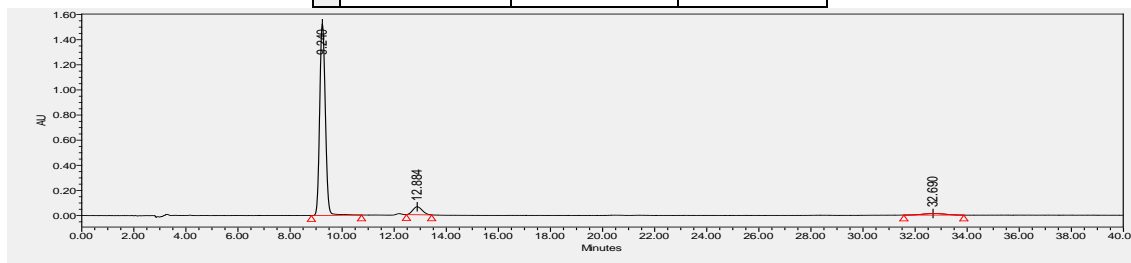

|   | Retention Time | Area     | % Area |
|---|----------------|----------|--------|
| 1 | 9.240          | 22878501 | 90.54  |
| 2 | 12.884         | 1616134  | 6.40   |
| 3 | 32.690         | 774439   | 3.06   |

***N*-((2*R*,3*S*)-3-benzyl-8-methyl-4-oxo-2-phenyl-3,4-dihydro-2*H*-benzo[4,5]thiazolo[3,2-*a*]pyrimidin-3-yl)benzamide (3ea)**

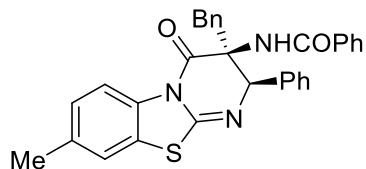

White solid; m.p. 100–103°C; 49.4 mg, 98% yield, 92% ee, >19:1 d.r.;  $[\alpha]_D^{21} = +472.40$  ( $c = 0.87$  in  $\text{CH}_2\text{Cl}_2$ ).

**UPCC** (chiral OD-3 column),  $\text{CO}_2/\text{MeOH} = 90/10$ , flow rate = 1.5 mL/min,  $\lambda = 216$  nm,  $t_R$  (major) = 11.31 min,  $t_R$  (minor) = 12.73 min.

**IR** (neat): 3405, 1645, 1479, 1370 and 1185  $\text{cm}^{-1}$ .

**$^1\text{H NMR}$**  (400 MHz,  $\text{CDCl}_3$ )  $\delta = 7.94 - 7.90$  (m, 1H), 7.48 – 7.42 (m, 3H), 7.37 – 7.32 (m, 2H), 7.29 – 7.25 (m, 3H), 7.23 – 7.17 (m, 4H), 7.15 – 7.10 (m, 3H), 6.95 – 6.86 (m, 3H), 6.13 (s, 1H), 4.37 (d,  $J = 14.0$  Hz, 1H), 3.49 (d,  $J = 13.9$  Hz, 1H), 2.43 (s, 3H).

**$^{13}\text{C NMR}$**  (101 MHz,  $\text{CDCl}_3$ )  $\delta = 167.8, 167.5, 154.0, 136.6, 135.9, 135.2, 134.9, 132.5, 131.6, 130.1, 128.8, 128.7, 128.5, 128.4, 127.6, 127.4, 127.3, 126.8, 123.4, 122.7, 115.7, 67.6, 64.8, 39.6, 21.4$ .

**HRMS** (ESI-FT) calcd for  $\text{C}_{31}\text{H}_{25}\text{N}_3\text{O}_2\text{S}^+$  ( $[\text{M}+\text{H}^+]$ ) = 504.1740, Found 504.1739.

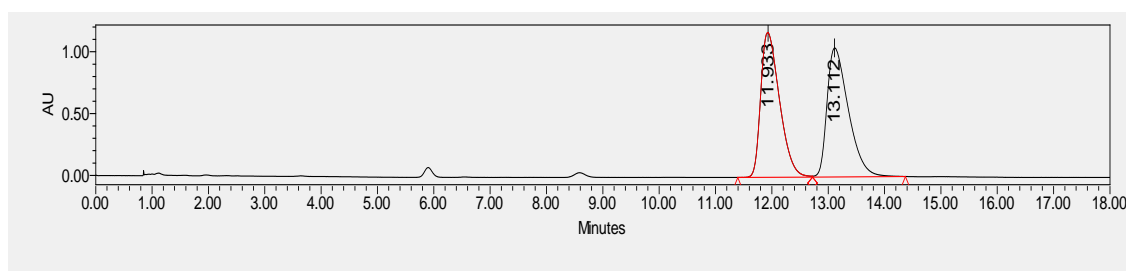

|   | Retention Time | Area     | % Area |
|---|----------------|----------|--------|
| 1 | 11.933         | 27038174 | 49.67  |
| 2 | 13.112         | 27395884 | 50.33  |

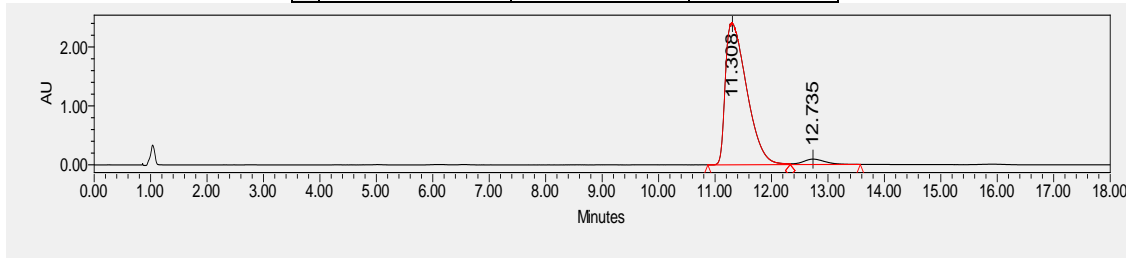

|   | Retention Time | Area     | % Area |
|---|----------------|----------|--------|
| 1 | 11.308         | 62962053 | 96.02  |
| 2 | 12.735         | 2610597  | 3.98   |

***N*-((2*R*,3*S*)-3-benzyl-8-methoxy-4-oxo-2-phenyl-3,4-dihydro-2*H*-benzo[4,5]thiazolo[3,2-*a*]pyrimidin-3-yl)benzamide (3fa)**

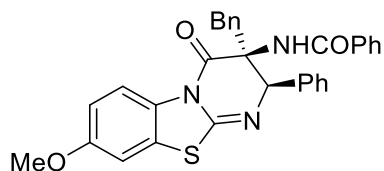

White solid; m.p. 95–98 °C; 50.1 mg, 99% yield, 96% ee, >19:1 d.r.;  $[\alpha]_D^{21} = +485.24$  ( $c = 0.73$  in  $\text{CH}_2\text{Cl}_2$ ).

UPCC (chiral IB-3 column),  $\text{CO}_2/\text{MeOH} = 90/10$ , flow rate = 1.5 mL/min,  $\lambda = 216$  nm,  $t_R$  (major) = 12.09 min,  $t_R$  (minor) = 13.71 min.

IR (neat): 3403, 1645, 1480, 1373 and 1183  $\text{cm}^{-1}$ .

$^1\text{H NMR}$  (400 MHz,  $\text{CDCl}_3$ )  $\delta = 7.99 - 7.93$  (m, 1H), 7.47 – 7.42 (m, 3H), 7.36 – 7.31 (m, 2H), 7.29 – 7.26 (m, 2H), 7.22 – 7.16 (m, 4H), 7.16 – 7.10 (m, 2H), 7.01 – 6.99 (m, 1H), 6.94 – 6.87 (m, 3H), 6.86 – 6.82 (m, 1H), 6.13 (s, 1H), 4.35 (d,  $J = 14.0$  Hz, 1H), 3.87 (s, 3H), 3.48 (d,  $J = 14.0$  Hz, 1H).

$^{13}\text{C NMR}$  (101 MHz,  $\text{CDCl}_3$ )  $\delta = 167.9, 167.2, 158.1, 154.0, 135.9, 135.2, 135.0, 131.7, 130.1, 128.8, 128.7, 128.5, 128.4, 128.4, 127.4, 127.3, 126.8, 124.9, 116.8, 112.3, 108.1, 67.7, 64.8, 56.0, 39.7$ .

HRMS (ESI-FT) calcd for  $\text{C}_{31}\text{H}_{25}\text{N}_3\text{O}_3\text{S}^+$  ( $[\text{M}+\text{H}]^+$ ) = 520.1689, Found 520.1689.

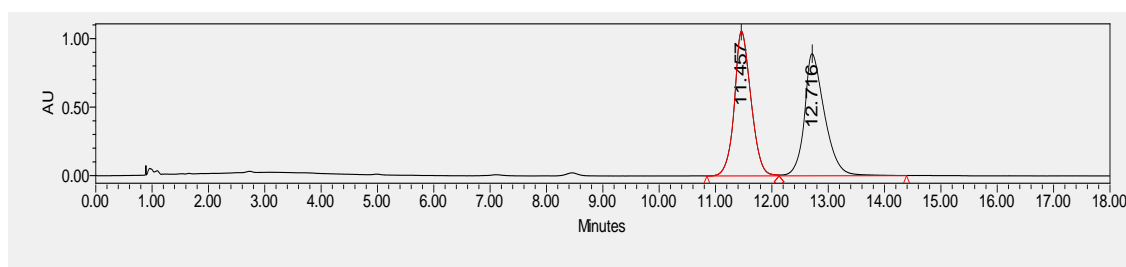

|   | Retention Time | Area     | % Area |
|---|----------------|----------|--------|
| 1 | 11.457         | 21572121 | 49.49  |
| 2 | 12.716         | 22016397 | 50.51  |

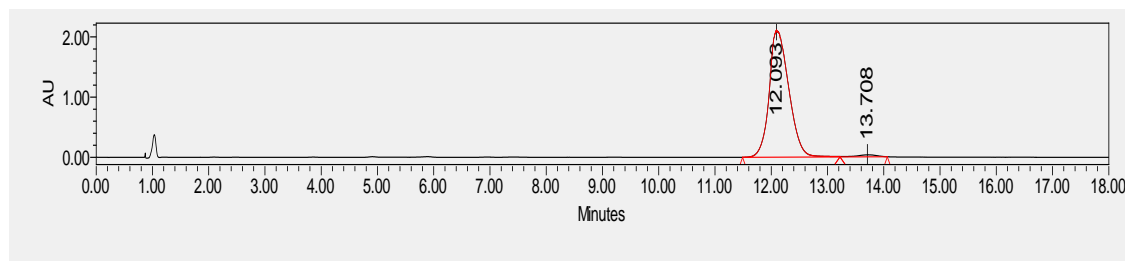

|   | Retention Time | Area     | % Area |
|---|----------------|----------|--------|
| 1 | 12.093         | 50897102 | 98.37  |
| 2 | 13.708         | 845023   | 1.63   |

***N*-((2*R*,3*S*)-3-benzyl-7-fluoro-4-oxo-2-phenyl-3,4-dihydro-2*H*-benzo[4,5]thiazolo[3,2-*a*]pyrimidin-3-yl)benzamide (3ga)**

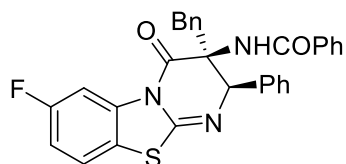

White solid; m.p. 95–97 °C; 45.4 mg, 89% yield, 89% ee, 93:7 d.r.;  $[\alpha]_D^{21} = +357.60$  ( $c = 0.84$  in  $\text{CH}_2\text{Cl}_2$ ).

**UPCC** (chiral QJH column),  $\text{CO}_2/\text{MeOH} = 80/20$ , flow rate = 1.0 mL/min,  $\lambda = 218$  nm,  $t_{\text{major isomer}} = 5.86$  min (minor), 7.50 min (major);  $t_{\text{minor isomer}} = 14.80$  min (major).

**IR** (neat): 3405, 1651, 1476, 1370 and 1184  $\text{cm}^{-1}$ .

**$^1\text{H}$  NMR** (400 MHz,  $\text{CDCl}_3$ )  $\delta = 7.86 - 7.81$  (m, 1H), 7.49 – 7.42 (m, 3H), 7.41 – 7.32 (m, 3H), 7.29 – 7.24 (m, 2H), 7.24 – 7.19 (m, 4H), 7.18 – 7.11 (m, 2H), 7.11 – 7.04 (m, 1H), 6.92 – 6.80 (m, 3H), 6.16 (s, 1H), 4.38 (d,  $J = 14.0$  Hz, 1H), 3.49 (d,  $J = 14.1$  Hz, 1H).

**$^{13}\text{C}$  NMR** (101 MHz,  $\text{CDCl}_3$ )  $\delta = 167.9, 167.8, 161.8$  (d,  $J = 245.1$  Hz), 153.9, 135.6, 135.4 (d,  $J = 11.9$  Hz), 135.0, 134.7, 131.8, 130.0, 128.9, 128.7, 128.7, 128.5, 127.6, 127.2, 126.8, 123.0 (d,  $J = 9.1$  Hz), 118.4 (d,  $J = 3.2$  Hz), 113.6 (d,  $J = 23.6$  Hz), 104.7 (d,  $J = 30.1$  Hz), 67.7, 64.9, 39.7.

**$^{19}\text{F}\{^1\text{H}\}$  NMR** (376 MHz,  $\text{CDCl}_3$ )  $\delta = -112.5$ .

**HRMS** (ESI-FT) calcd for  $\text{C}_{30}\text{H}_{23}\text{FN}_3\text{O}_2\text{S}^+$  ( $[\text{M}+\text{H}^+]$ ) = 508.1490, Found 508.1492.

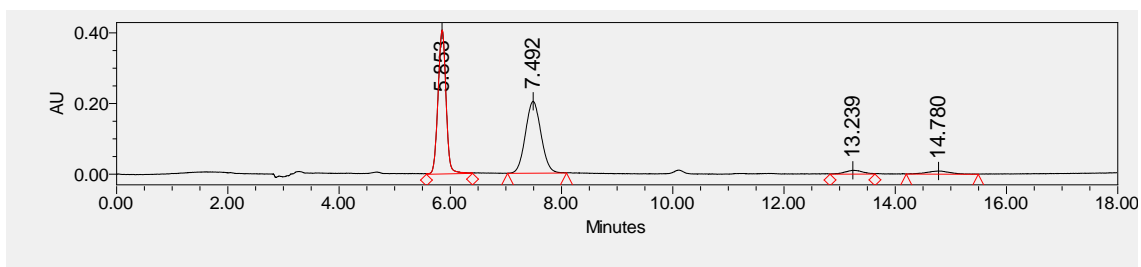

|   | Retention Time | Area    | % Area |
|---|----------------|---------|--------|
| 1 | 5.853          | 4068571 | 47.61  |
| 2 | 7.492          | 3965123 | 46.40  |
| 3 | 13.239         | 244410  | 2.86   |
| 4 | 14.780         | 268145  | 3.14   |

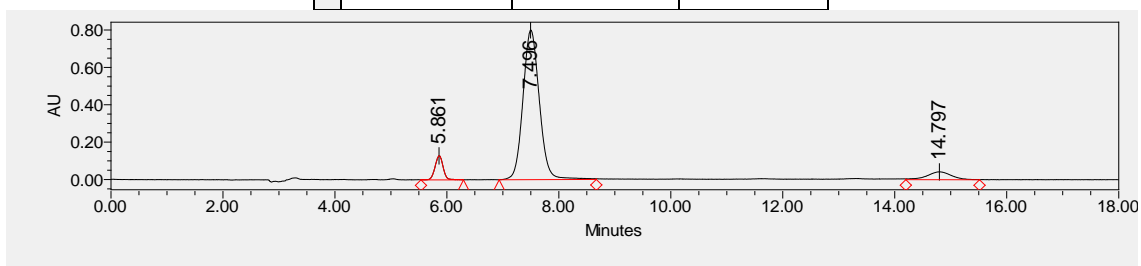

|   | Retention Time | Area     | % Area |
|---|----------------|----------|--------|
| 1 | 5.861          | 1292499  | 6.85   |
| 2 | 7.496          | 16298185 | 86.36  |
| 3 | 14.797         | 1282641  | 6.80   |

***N*-((2*R*,3*S*)-3-benzyl-7-chloro-4-oxo-2-phenyl-3,4-dihydro-2*H*-benzo[4,5]thiazolo[3,2-*a*]pyrimidin-3-yl)benzamide (3ha)**

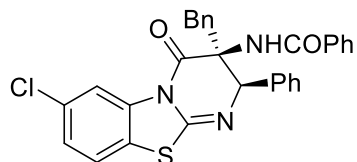

White solid; m.p. 103–105 °C; 48.3 mg, 92% yield, 80% ee, 93:7 d.r.;  $[\alpha]_D^{21} = +340.35$  ( $c = 0.81$  in  $\text{CH}_2\text{Cl}_2$ ).

**UPCC** (chiral OD-3 column),  $\text{CO}_2/\text{MeOH} = 90/10$ , flow rate = 1.5 mL/min,  $\lambda = 223$  nm,  $t_{\text{major isomer}} = 14.21$  min (major), 15.65 min (minor);  $t_{\text{minor isomer}} = 18.89$  min (major).

**IR** (neat): 3405, 1652, 1486, 1367 and 1185  $\text{cm}^{-1}$ .

**$^1\text{H NMR}$**  (400 MHz,  $\text{CDCl}_3$ )  $\delta = 8.08$  (s, 1H), 7.55 – 7.38 (m, 4H), 7.38 – 7.29 (m, 4H), 7.26 – 7.23 (m, 2H), 7.23 – 7.18 (m, 4H), 7.18 – 7.12 (m, 2H), 6.91 – 6.80 (m, 3H), 6.15 (s, 1H), 4.36 (d,  $J = 14.0$  Hz, 1H), 3.47 (d,  $J = 14.0$  Hz, 1H).

**$^{13}\text{C NMR}$**  (101 MHz,  $\text{CDCl}_3$ )  $\delta = 167.8, 153.3, 135.6, 135.4, 135.0, 134.7, 133.0, 131.8, 130.0, 128.9, 128.7, 128.7, 128.5, 127.7, 127.2, 126.8, 126.6, 123.0, 121.9, 116.4, 67.7, 64.9, 39.7$ .

**HRMS** (ESI-FT) calcd for  $\text{C}_{30}\text{H}_{23}^{35}\text{ClN}_3\text{O}_2\text{S}^+$  ( $[\text{M}+\text{H}^+]$ ) = 524.1194, Found 524.1195,  $\text{C}_{30}\text{H}_{23}^{37}\text{ClN}_3\text{O}_2\text{S}^+$  ( $[\text{M}+\text{H}^+]$ ) = 526.1165, Found 526.1168.

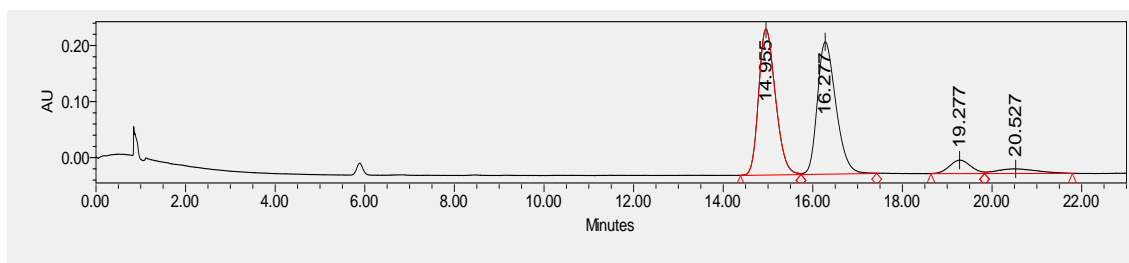

|   | Retention Time | Area    | % Area |
|---|----------------|---------|--------|
| 1 | 14.955         | 6779066 | 45.52  |
| 2 | 16.277         | 6791529 | 45.60  |
| 3 | 19.277         | 799823  | 5.37   |
| 4 | 20.527         | 522150  | 3.51   |

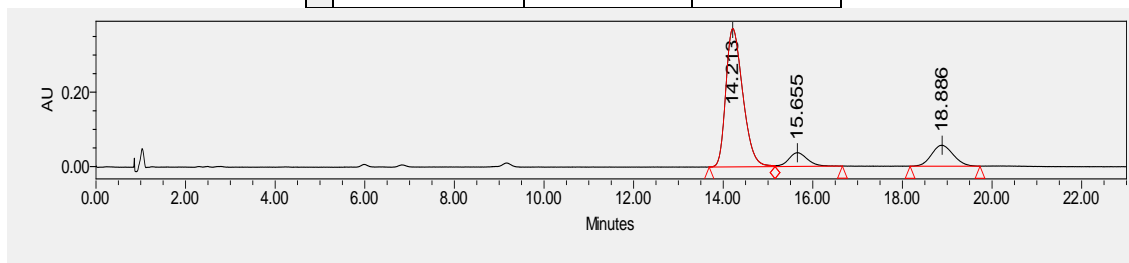

|   | Retention Time | Area    | % Area |
|---|----------------|---------|--------|
| 1 | 14.213         | 9763116 | 76.57  |
| 2 | 15.655         | 1087292 | 8.53   |
| 3 | 18.886         | 1899827 | 14.90  |



***N*-((2*R*,3*S*)-3-benzyl-6-fluoro-4-oxo-2-phenyl-3,4-dihydro-2*H*-benzo[4,5]thiazolo[3,2-*a*]pyrimidin-3-yl)benzamide (3ia)**

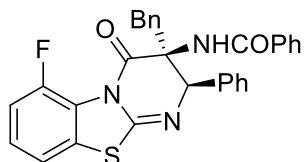

White solid; m.p. 97–100 °C; 47.5 mg, 94% yield, 80% ee, 89:11 d.r.;  $[\alpha]_D^{21} = -55.93$  ( $c = 0.83$  in  $\text{CH}_2\text{Cl}_2$ ).

**UPCC** (chiral ID-3 column),  $\text{CO}_2/\text{MeOH} = 95/5$ , flow rate = 1.5 mL/min,  $\lambda = 210$  nm,  $t_{\text{major isomer}} = 44.17$  min (major), 41.06 min (minor);  $t_{\text{minor isomer}} = 37.13$  min (major),  $t_{\text{minor isomer}} = 31.10$  min (minor).

**IR** (neat): 3377, 1816, 1652, 1538 and 978  $\text{cm}^{-1}$ .

**$^1\text{H}$  NMR** (400 MHz,  $\text{CDCl}_3$ )  $\delta = 7.84 - 7.79$  (m, 2H), 7.66 – 7.57 (m, 2H), 7.57 – 7.49 (m, 1H), 7.45 – 7.39 (m, 2H), 7.39 – 7.34 (m, 2H), 7.33 – 7.28 (m, 2H), 7.20 – 7.14 (m, 1H), 7.13 – 7.10 (m, 4H), 7.05 – 6.96 (m, 2H), 6.50 – 6.39 (m, 1H), 5.19 (d,  $J = 10.0$  Hz, 1H), 3.27 (d,  $J = 13.6$  Hz, 1H), 3.02 (d,  $J = 13.6$  Hz, 1H).

**$^{13}\text{C}$  NMR** (101 MHz,  $\text{CDCl}_3$ )  $\delta = 178.7, 166.5, 162.2, 153.6$  (d,  $J = 251.1$  Hz), 136.1, 133.4, 133.2, 130.3, 129.0, 128.8, 128.8, 128.5, 128.3, 128.1, 127.5, 125.0, 122.6 (d,  $J = 6.8$  Hz), 116.7 (d,  $J = 3.9$  Hz), 112.2 (d,  $J = 18.2$  Hz), 78.0, 64.2, 41.5.

**$^{19}\text{F}\{^1\text{H}\}$  NMR** (376 MHz,  $\text{CDCl}_3$ )  $\delta = -125.9$ .

**HRMS** (ESI-FT) calcd for  $\text{C}_{30}\text{H}_{23}\text{FN}_3\text{O}_2\text{S}^+$  ( $[\text{M}+\text{H}^+]$ ) = 508.1490, Found 508.1490.

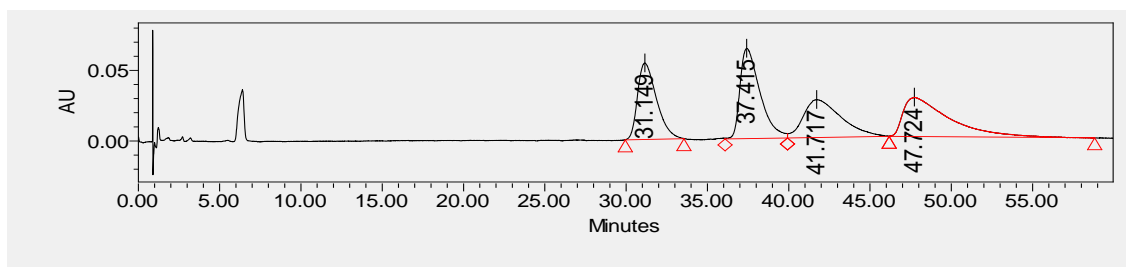

|   | Retention Time | Area    | % Area |
|---|----------------|---------|--------|
| 1 | 31.149         | 4380946 | 22.30  |
| 2 | 37.415         | 5473074 | 27.86  |
| 3 | 41.717         | 4337053 | 22.08  |
| 4 | 47.724         | 5454420 | 27.76  |

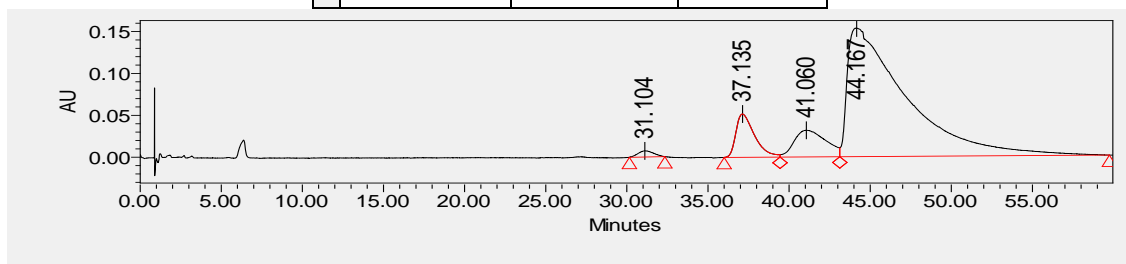

|   | Retention Time | Area     | % Area |
|---|----------------|----------|--------|
| 1 | 31.104         | 493818   | 1.03   |
| 2 | 37.135         | 4134431  | 8.65   |
| 3 | 41.060         | 4358556  | 9.12   |
| 4 | 44.167         | 38783998 | 81.19  |

***N*-((2*R*,3*S*)-3-benzyl-6-chloro-4-oxo-2-phenyl-3,4-dihydro-2*H*-benzo[4,5]thiazolo[3,2-*a*]pyrimidin-3-yl)benzamide (3ja)**

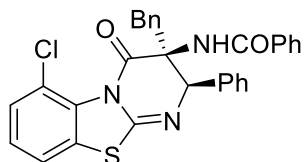

White solid; m.p. 103–107 °C; 52.4 mg, 99% yield, 76% ee, 90:10 d.r.;  $[\alpha]_D^{21} = -42.84$  ( $c = 0.88$  in  $\text{CH}_2\text{Cl}_2$ ).

**UPCC** (chiral AD-3 column),  $\text{CO}_2/\text{iPrOH} = 80/20$ , flow rate = 1.5 mL/min,  $\lambda = 229$  nm,  $t_{\text{major isomer}} = 10.90$  min (major),  $t_{\text{minor isomer}} = 8.01$  min (minor);  $t_{\text{minor isomer}} = 6.02$  min (major),  $t_{\text{minor isomer}} = 9.35$  min (minor).

**IR** (neat): 3375, 1815, 1652, 1532 and 978  $\text{cm}^{-1}$ .

**$^1\text{H}$  NMR** (400 MHz,  $\text{CDCl}_3$ )  $\delta = 7.86 - 7.80$  (m, 2H), 7.63 – 7.58 (m, 2H), 7.57 – 7.52 (m, 1H), 7.45 – 7.34 (m, 5H), 7.34 – 7.26 (m, 2H), 7.21 – 7.14 (m, 1H), 7.12 – 7.08 (m, 4H), 7.01 – 6.95 (m, 1H), 6.58 – 6.42 (m, 1H), 5.08 (d,  $J = 7.6$  Hz, 1H), 3.25 (d,  $J = 13.6$  Hz, 1H), 2.99 (d,  $J = 13.6$  Hz, 1H).

**$^{13}\text{C}$  NMR** (101 MHz,  $\text{CDCl}_3$ )  $\delta = 178.6, 167.1, 162.3, 148.8, 136.0, 133.3, 133.2, 132.0, 130.3, 129.1, 128.8, 128.8, 128.6, 128.3, 128.2, 127.5, 126.4, 125.0, 123.9, 122.6, 119.5, 78.0, 64.7, 41.6$ .

**HRMS** (ESI-FT) calcd for  $\text{C}_{30}\text{H}_{23}^{35}\text{ClN}_3\text{O}_2\text{S}^+$  ( $[\text{M}+\text{H}^+]$ ) = 524.1194, Found 524.1196,  $\text{C}_{30}\text{H}_{23}^{37}\text{ClN}_3\text{O}_2\text{S}^+$  ( $[\text{M}+\text{H}^+]$ ) = 526.1165, Found 526.1170.

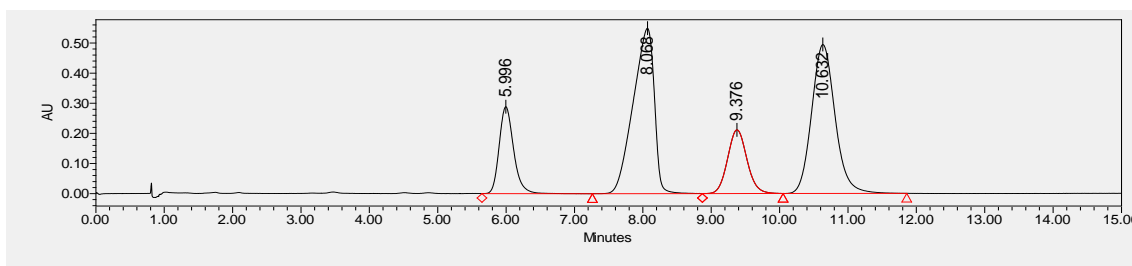

|   | Retention Time | Area     | % Area |
|---|----------------|----------|--------|
| 1 | 5.996          | 4239335  | 13.27  |
| 2 | 8.068          | 11793785 | 36.93  |
| 3 | 9.376          | 4155093  | 13.01  |
| 4 | 10.632         | 11749429 | 36.79  |

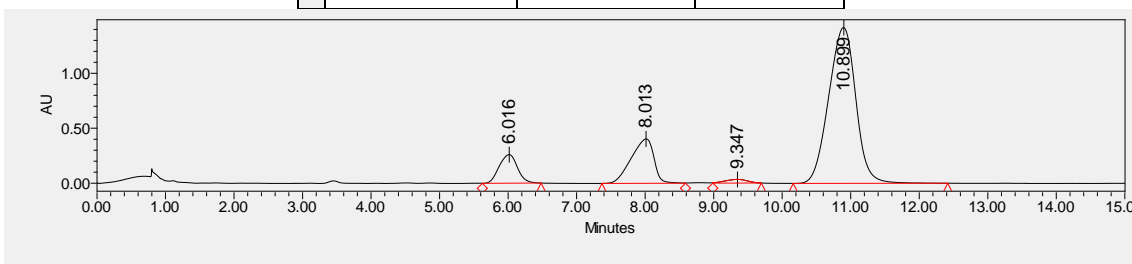

|   | Retention Time | Area     | % Area |
|---|----------------|----------|--------|
| 1 | 6.016          | 4820428  | 8.95   |
| 2 | 8.013          | 9319117  | 17.31  |
| 3 | 9.347          | 761815   | 1.41   |
| 4 | 10.899         | 38940965 | 72.32  |

***N*-((2*R*,3*S*)-3-benzyl-6-methyl-4-oxo-2-phenyl-3,4-dihydro-2*H*-benzo[4,5]thiazolo[3,2-*a*]pyrimidin-3-yl)benzamide (3ka)**

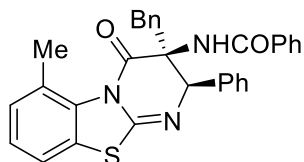

White solid; m.p. 80–83 °C; 48.4 mg, 96% yield, 91% ee, >19:1 d.r.;  $[\alpha]^{22}_D = -75.38$  ( $c = 0.79$  in  $\text{CH}_2\text{Cl}_2$ ).

**UPCC** (chiral AD-3 column),  $\text{CO}_2/\text{MeOH} = 90/10$ , flow rate = 1.5 mL/min,  $\lambda = 227$  nm,  $t_R$  (major) = 11.76 min,  $t_R$  (minor) = 10.18 min.

**IR** (neat): 3375, 1815, 1651, 1536 and 978  $\text{cm}^{-1}$ .

**$^1\text{H}$  NMR** (400 MHz,  $\text{CDCl}_3$ )  $\delta = 7.82 - 7.78$  (m, 2H), 7.61 – 7.57 (m, 2H), 7.54 – 7.48 (m, 1H), 7.42 – 7.37 (m, 3H), 7.35 – 7.30 (m, 2H), 7.29 – 7.26 (m, 1H), 7.26 – 7.22 (m, 1H), 7.12 – 7.08 (m, 5H), 7.07 – 7.04 (m, 1H), 6.98 – 6.93 (m, 1H), 6.21 (s, 1H), 5.27 (s, 1H), 3.27 (d,  $J = 13.6$  Hz, 1H), 3.02 (d,  $J = 13.6$  Hz, 1H), 2.50 (s, 3H).

**$^{13}\text{C}$  NMR** (101 MHz,  $\text{CDCl}_3$ )  $\delta = 178.8, 165.4, 162.0, 136.7, 133.6, 133.1, 130.3, 129.4, 128.8, 128.7, 128.6, 128.3, 128.2, 127.5, 126.9, 125.2, 122.1, 118.4, 78.1, 64.2, 41.7, 18.5$ .

**HRMS** (ESI-FT) calcd for  $\text{C}_{31}\text{H}_{25}\text{N}_3\text{O}_2\text{S}^+$  ( $[\text{M}+\text{H}]^+$ ) = 504.1740, Found 504.1740.

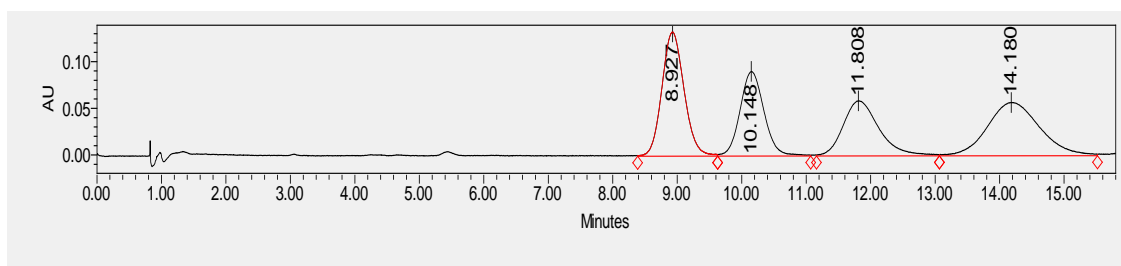

|   | Retention Time | Area    | % Area |
|---|----------------|---------|--------|
| 1 | 8.927          | 3175449 | 28.73  |
| 2 | 10.148         | 2342855 | 21.19  |
| 3 | 11.808         | 2293356 | 20.75  |
| 4 | 14.180         | 3242664 | 29.33  |

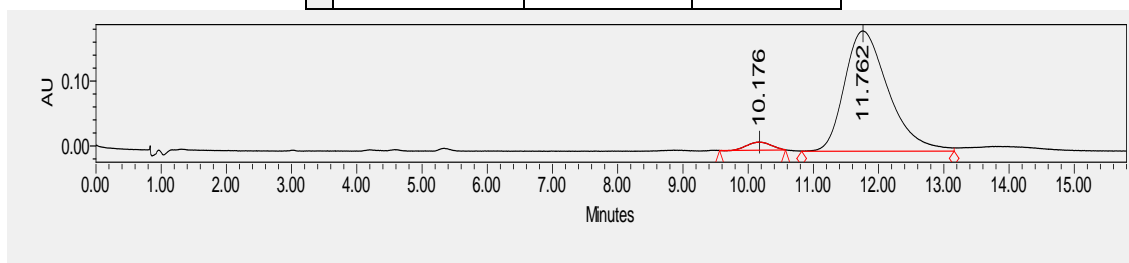

|   | Retention Time | Area    | % Area |
|---|----------------|---------|--------|
| 1 | 10.176         | 324606  | 3.61   |
| 2 | 11.762         | 8660540 | 96.39  |

***N*-((2*R*,3*S*)-3-benzyl-2-(4-fluorophenyl)-4-oxo-3,4-dihydro-2*H*-benzo[4,5]thiazolo[3,2-*a*]pyrimidin-3-yl)benzamide (31a)**

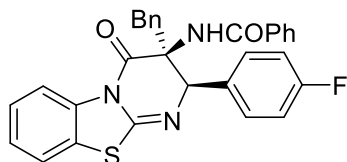

White solid; m.p. 92–95 °C; 52.6 mg, 99% yield, 94% ee, >19:1 d.r.;  $[\alpha]_D^{25} = +467.09$  ( $c = 0.79$  in  $\text{CH}_2\text{Cl}_2$ ).

**UPCC** (chiral OD-3 column),  $\text{CO}_2/\text{MeOH} = 95/5$ , flow rate = 1.5 mL/min,  $\lambda = 214$  nm,  $t_R$  (major) = 17.02 min,  $t_R$  (minor) = 16.20 min.

**IR** (neat): 3403, 1646, 1512, 1370 and 1187  $\text{cm}^{-1}$ .

**$^1\text{H}$  NMR** (400 MHz,  $\text{CDCl}_3$ )  $\delta = 8.06 - 8.00$  (m, 1H), 7.51 – 7.44 (m, 4H), 7.40 – 7.32 (m, 4H), 7.28 – 7.23 (m, 2H), 7.22 – 7.16 (m, 1H), 7.15 – 7.09 (m, 2H), 6.96 (s, 1H), 6.92 – 6.86 (m, 4H), 6.15 (s, 1H), 4.33 (d,  $J = 14.0$  Hz, 1H), 3.48 (d,  $J = 14.0$  Hz, 1H).

**$^{13}\text{C}$  NMR** (101 MHz,  $\text{CDCl}_3$ )  $\delta = 167.8, 167.6, 162.7$  (d,  $J = 247.3$  Hz), 153.9, 134.9, 134.8 (d,  $J = 2.3$  Hz), 131.9, 131.8 (d,  $J = 3.3$  Hz), 130.1, 129.1 (d,  $J = 8.2$  Hz), 128.8, 128.5, 127.6, 127.1, 126.8, 126.5, 123.5, 122.4, 116.0, 115.8, 115.6, 66.9, 64.9, 39.7.

**$^{19}\text{F}\{^1\text{H}\}$  NMR** (376 MHz,  $\text{CDCl}_3$ )  $\delta = -113.3$ .

**HRMS** (ESI-FT) calcd for  $\text{C}_{30}\text{H}_{23}\text{FN}_3\text{O}_2\text{S}^+$  ( $[\text{M}+\text{H}^+]$ ) = 508.1490, Found 508.1489.

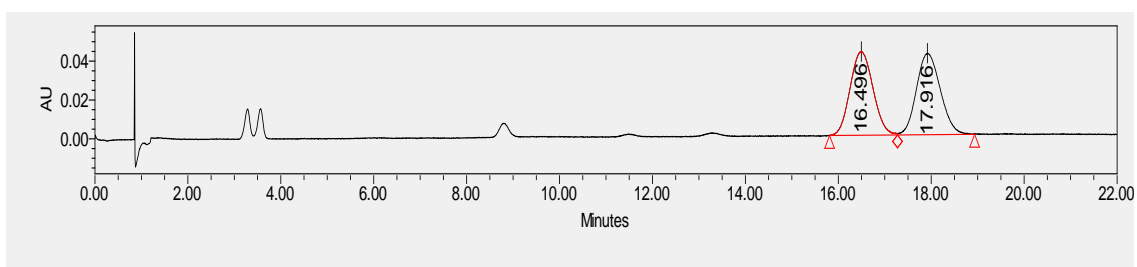

|   | Retention Time | Area    | % Area |
|---|----------------|---------|--------|
| 1 | 16.496         | 1472537 | 49.62  |
| 2 | 17.916         | 1494974 | 50.38  |

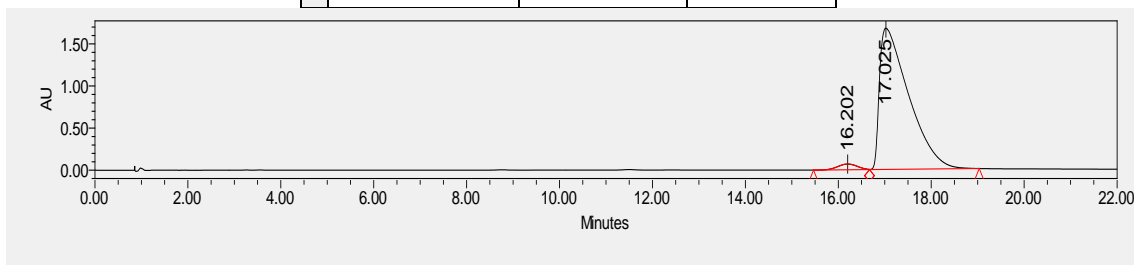

|   | Retention Time | Area     | % Area |
|---|----------------|----------|--------|
| 1 | 16.202         | 1961378  | 2.61   |
| 2 | 17.025         | 73054163 | 97.39  |

***N*-((2*R*,3*S*)-3-benzyl-2-(4-chlorophenyl)-4-oxo-3,4-dihydro-2*H*-benzo[4,5]thiazolo[3,2-*a*]pyrimidin-3-yl)benzamide (3ma)**

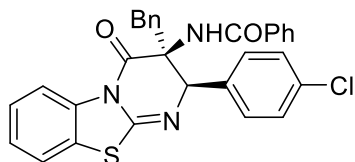

White solid; m.p. 93–97 °C; 53.1 mg, 99% yield, 93% ee, >19:1 d.r.;  $[\alpha]_D^{21} = +469.04$  ( $c = 0.69$  in  $\text{CH}_2\text{Cl}_2$ ).

**UPCC** (chiral AS-3 column),  $\text{CO}_2/\text{MeOH} = 93/7$ , flow rate = 1.5 mL/min,  $\lambda = 230$  nm,  $t_R$  (major) = 5.33 min,  $t_R$  (minor) = 4.85 min.

**IR** (neat): 3403, 1645, 1463, 1369 and 1187  $\text{cm}^{-1}$ .

**$^1\text{H}$  NMR** (400 MHz,  $\text{CDCl}_3$ )  $\delta = 8.06 - 7.99$  (m, 1H), 7.51 – 7.45 (m, 4H), 7.41 – 7.35 (m, 2H), 7.35 – 7.32 (m, 2H), 7.23 – 7.15 (m, 5H), 7.15 – 7.09 (m, 2H), 6.96 (s, 1H), 6.90 – 6.84 (m, 2H), 6.14 (s, 1H), 4.32 (d,  $J = 14.0$  Hz, 1H), 3.47 (d,  $J = 14.0$  Hz, 1H).

**$^{13}\text{C}$  NMR** (101 MHz,  $\text{CDCl}_3$ )  $\delta = 167.8, 167.6, 154.2, 134.9, 134.7, 134.7, 134.5, 134.4, 131.9, 130.1, 129.0, 128.8, 128.7, 128.5, 127.6, 127.1, 126.8, 126.6, 123.5, 122.4, 116.0, 67.0, 64.8, 39.7$ .

**HRMS** (ESI-FT) calcd for  $\text{C}_{30}\text{H}_{23}^{35}\text{ClN}_3\text{O}_2\text{S}^+$  ( $[\text{M}+\text{H}^+]$ ) = 524.1194, Found 524.1194,  $\text{C}_{30}\text{H}_{23}^{37}\text{ClN}_3\text{O}_2\text{S}^+$  ( $[\text{M}+\text{H}^+]$ ) = 526.1165, Found 526.1168.

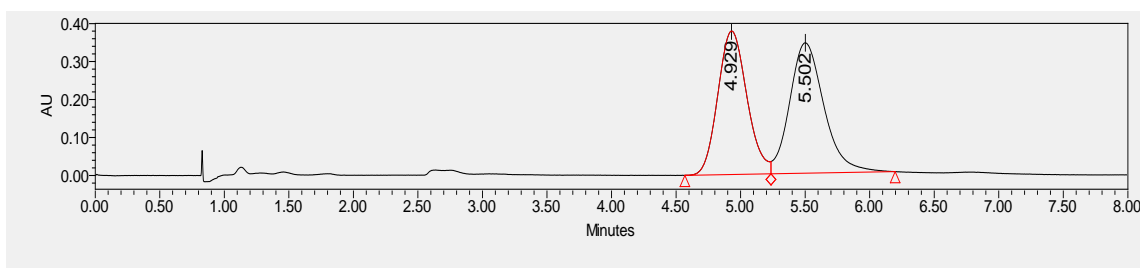

|   | Retention Time | Area    | % Area |
|---|----------------|---------|--------|
| 1 | 4.929          | 5923010 | 48.31  |
| 2 | 5.502          | 6338100 | 51.69  |

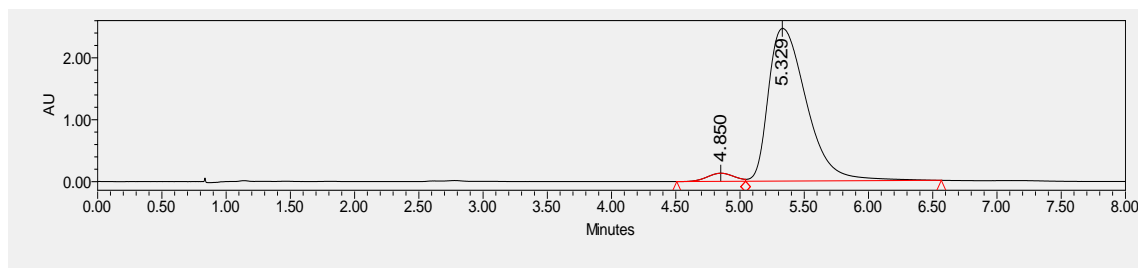

|   | Retention Time | Area     | % Area |
|---|----------------|----------|--------|
| 1 | 4.850          | 1909426  | 3.62   |
| 2 | 5.329          | 50839544 | 96.38  |

***N*-{(2*R*,3*S*)-3-benzyl-2-(4-bromophenyl)-4-oxo-3,4-dihydro-2*H*-benzo[4,5]thiazolo[3,2-*a*]pyrimidin-3-yl}benzamide (3na)**

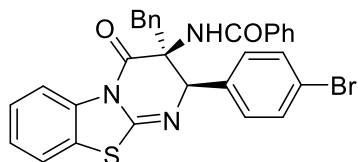

White solid; m.p. 107–110 °C; 57.9 mg, 99% yield, 91% ee, >19:1 d.r.;  $[\alpha]_D^{22} = +422.30$  ( $c = 0.76$  in  $\text{CH}_2\text{Cl}_2$ ).

**UPCC** (chiral AS-3 column),  $\text{CO}_2/\text{MeOH} = 93/7$ , flow rate = 1.5 mL/min,  $\lambda = 254$  nm,  $t_R$  (major) = 9.48 min,  $t_R$  (minor) = 8.60 min.

**IR** (neat): 3403, 1645, 1463, 1369 and 1186  $\text{cm}^{-1}$ .

**$^1\text{H}$  NMR** (400 MHz,  $\text{CDCl}_3$ )  $\delta = 8.05 - 8.00$  (m, 1H), 7.52 – 7.45 (m, 4H), 7.41 – 7.36 (m, 2H), 7.35 – 7.30 (m, 4H), 7.22 – 7.17 (m, 1H), 7.17 – 7.09 (m, 4H), 6.96 (s, 1H), 6.89 – 6.85 (m, 2H), 6.13 (s, 1H), 4.32 (d,  $J = 14.0$  Hz, 1H), 3.47 (d,  $J = 14.0$  Hz, 1H).

**$^{13}\text{C}$  NMR** (101 MHz,  $\text{CDCl}_3$ )  $\delta = 167.8, 167.5, 154.2, 135.0, 134.8, 134.7, 134.7, 131.9, 131.9, 130.1, 129.0, 128.8, 128.5, 127.6, 127.1, 126.8, 126.6, 123.4, 122.6, 122.4, 116.0, 67.0, 64.7, 39.7$ .

**HRMS** (ESI-FT) calcd for  $\text{C}_{30}\text{H}_{23}^{79}\text{BrN}_3\text{O}_2\text{S}^+$  ( $[\text{M}+\text{H}^+]$ ) = 568.0689, Found 568.0689,  $\text{C}_{30}\text{H}_{23}^{81}\text{BrN}_3\text{O}_2\text{S}^+$  ( $[\text{M}+\text{H}^+]$ ) = 570.0668, Found 570.0668.

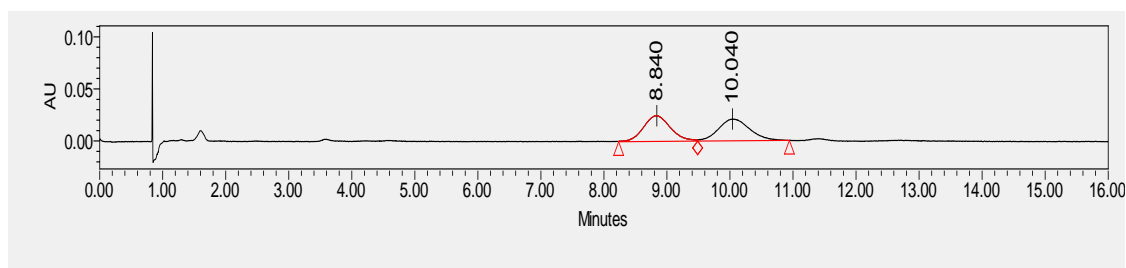

|   | Retention Time | Area   | % Area |
|---|----------------|--------|--------|
| 1 | 8.840          | 736019 | 50.48  |
| 2 | 10.040         | 722079 | 49.52  |

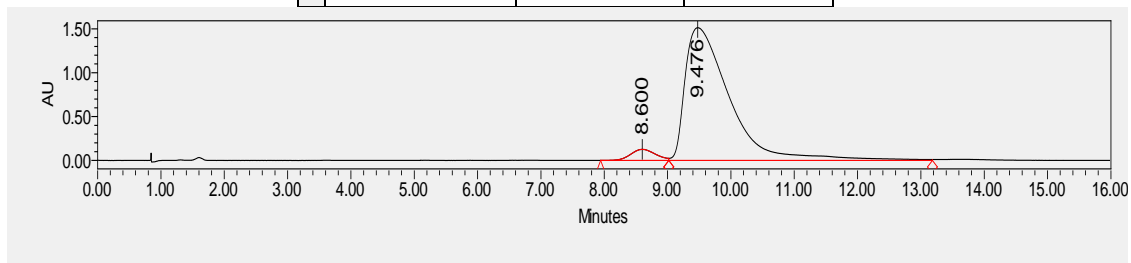

|   | Retention Time | Area     | % Area |
|---|----------------|----------|--------|
| 1 | 8.600          | 3430058  | 4.43   |
| 2 | 9.476          | 73952045 | 95.57  |

***N*-((2*R*,3*S*)-3-benzyl-2-(4-iodophenyl)-4-oxo-3,4-dihydro-2*H*-benzo[4,5]thiazolo[3,2-*a*]pyrimidin-3-yl)benzamide (3oa)**

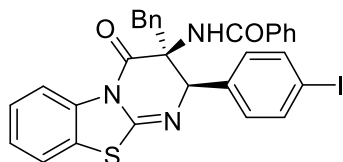

White solid; m.p. 115–117 °C; 60.4 mg, 98% yield, 90% ee, >19:1 d.r.;  $[\alpha]_D^{22} = +421.46$  ( $c = 0.086$  in  $\text{CH}_2\text{Cl}_2$ ).

**UPCC** (chiral AS-3 column),  $\text{CO}_2/\text{MeOH} = 90/10$ , flow rate = 1.5 mL/min,  $\lambda = 220$  nm,  $t_R$  (major) = 8.51 min,  $t_R$  (minor) = 7.41 min.

**IR** (neat): 3401, 1645, 1462, 1369 and 1186  $\text{cm}^{-1}$ .

**$^1\text{H}$  NMR** (400 MHz,  $\text{CDCl}_3$ )  $\delta = 8.05 - 8.00$  (m, 1H), 7.55 – 7.47 (m, 5H), 7.46 – 7.44 (m, 1H), 7.41 – 7.36 (m, 2H), 7.35 – 7.30 (m, 2H), 7.22 – 7.16 (m, 1H), 7.15 – 7.09 (m, 2H), 7.05 – 7.00 (m, 2H), 6.97 (s, 1H), 6.89 – 6.85 (m, 2H), 6.11 (s, 1H), 4.32 (d,  $J = 14.0$  Hz, 1H), 3.47 (d,  $J = 14.0$  Hz, 1H).

**$^{13}\text{C}$  NMR** (101 MHz,  $\text{CDCl}_3$ )  $\delta = 167.8, 167.5, 154.2, 137.8, 135.6, 134.8, 134.7, 134.7, 131.9, 130.1, 129.2, 128.8, 128.4, 127.6, 127.1, 126.8, 126.5, 123.4, 122.4, 116.0, 94.3, 67.1, 64.7, 39.7$ .

**HRMS** (ESI-FT) calcd for  $\text{C}_{30}\text{H}_{23}\text{IN}_3\text{O}_2\text{S}^+$  ( $[\text{M}+\text{H}]^+$ ) = 616.0550, Found 616.0549.

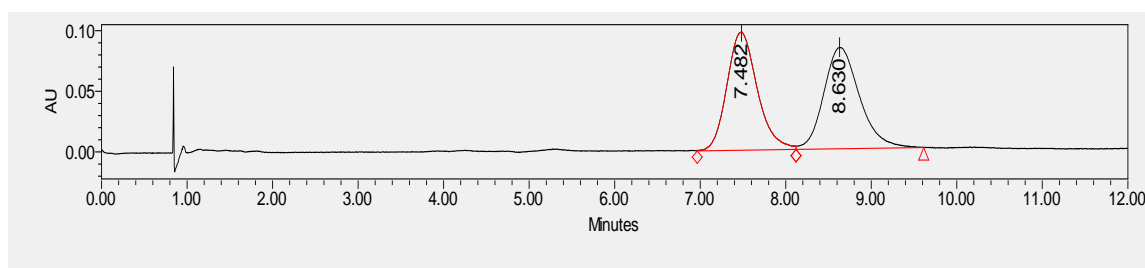

|   | Retention Time | Area    | % Area |
|---|----------------|---------|--------|
| 1 | 7.482          | 2400697 | 49.71  |
| 2 | 8.630          | 2428484 | 50.29  |

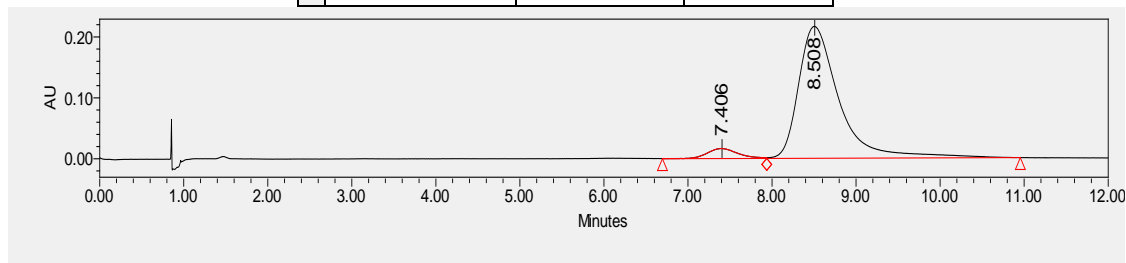

|   | Retention Time | Area    | % Area |
|---|----------------|---------|--------|
| 1 | 7.406          | 411828  | 5.38   |
| 2 | 8.508          | 7242248 | 94.62  |

***N*-((2*R*,3*S*)-3-benzyl-4-oxo-2-(*p*-tolyl)-3,4-dihydro-2*H*-benzo[4,5]thiazolo[3,2-*a*]pyrimidin-3-yl)benzamide (3pa)**

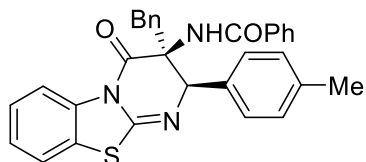

White solid; m.p. 90–93°C; 50.3 mg, 99% yield, 96% ee, >19:1 d.r.;  $[\alpha]_D^{22} = +485.92$  ( $c = 0.71$  in  $\text{CH}_2\text{Cl}_2$ ).

**UPCC** (chiral AS-3 column),  $\text{CO}_2/\text{EtOH} = 93/7$ , flow rate = 1.5 mL/min,  $\lambda = 254$  nm,  $t_R$  (major) = 7.36 min,  $t_R$  (minor) = 6.50 min.

**IR** (neat): 3406, 1646, 1463, 1370 and 1186  $\text{cm}^{-1}$ .

**$^1\text{H}$  NMR** (400 MHz,  $\text{CDCl}_3$ )  $\delta = 8.06 - 8.00$  (m, 1H), 7.50 – 7.43 (m, 4H), 7.38 – 7.31 (m, 4H), 7.21 – 7.17 (m, 1H), 7.16 – 7.10 (m, 4H), 7.02 – 6.98 (m, 2H), 6.92 (s, 1H), 6.91 – 6.87 (m, 2H), 6.11 (s, 1H), 4.36 (d,  $J = 14.0$  Hz, 1H), 3.49 (d,  $J = 14.0$  Hz, 1H), 2.23 (s, 3H).

**$^{13}\text{C}$  NMR** (101 MHz,  $\text{CDCl}_3$ )  $\delta = 167.9, 167.8, 153.6, 138.3, 135.3, 135.0, 134.9, 132.7, 131.7, 130.1, 129.5, 128.7, 128.4, 127.5, 127.2, 127.0, 126.9, 126.4, 123.6, 122.4, 115.9, 67.4, 65.0, 39.6, 21.2$ .

**HRMS** (ESI-FT) calcd for  $\text{C}_{31}\text{H}_{25}\text{N}_3\text{O}_2\text{S}^+$  ( $[\text{M}+\text{H}^+]$ ) = 504.1740, Found 504.1737.

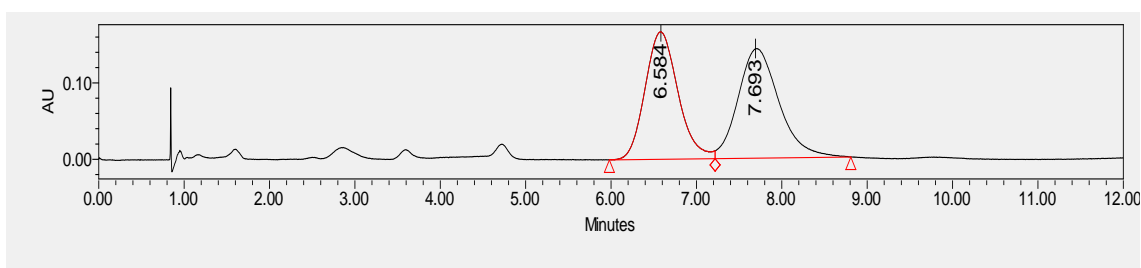

|   | Retention Time | Area    | % Area |
|---|----------------|---------|--------|
| 1 | 6.584          | 4476795 | 48.39  |
| 2 | 7.693          | 4773960 | 51.61  |

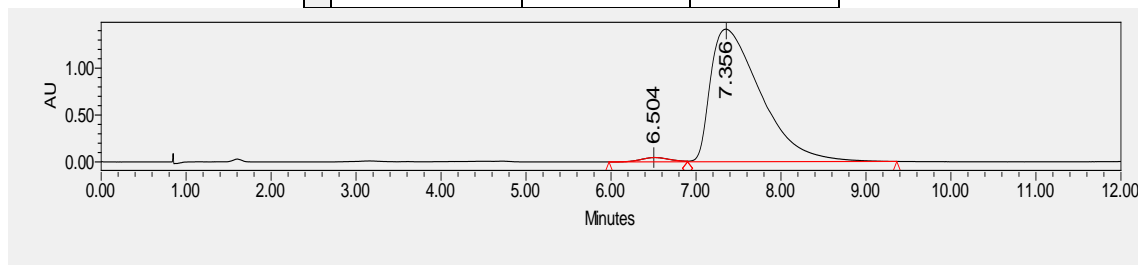

|   | Retention Time | Area     | % Area |
|---|----------------|----------|--------|
| 1 | 6.504          | 1099307  | 1.86   |
| 2 | 7.356          | 58027529 | 98.14  |



***N*-{((2*R*,3*S*)-3-benzyl-2-(4-methoxyphenyl)-4-oxo-3,4-dihydro-2*H*-benzo[4,5]thiazolo[3,2-*a*]pyrimidin-3-yl)benzamide (3qa)**

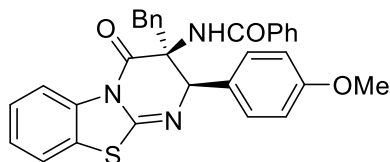

White solid; m.p. 83–88 °C; 44.6 mg, 86% yield, 94% ee, >19:1 d.r.;  $[\alpha]_D^{22} = +436.46$  ( $c = 0.48$  in  $\text{CH}_2\text{Cl}_2$ ).

**UPCC** (chiral OD-3 column),  $\text{CO}_2/\text{MeOH} = 90/10$ , flow rate = 1.5 mL/min,  $\lambda = 254$  nm,  $t_R$  (major) = 5.88 min,  $t_R$  (minor) = 6.45 min.

**IR** (neat): 3405, 1646, 1513, 1463, 1371 and 1183  $\text{cm}^{-1}$ .

**$^1\text{H}$  NMR** (400 MHz,  $\text{CDCl}_3$ )  $\delta = 8.06 - 8.00$  (m, 1H), 7.51 – 7.43 (m, 4H), 7.39 – 7.30 (m, 4H), 7.22 – 7.16 (m, 3H), 7.15 – 7.10 (m, 2H), 6.94 (s, 1H), 6.91 – 6.86 (m, 2H), 6.75 – 6.70 (m, 2H), 6.10 (s, 1H), 4.34 (d,  $J = 14.0$  Hz, 1H), 3.69 (s, 3H), 3.47 (d,  $J = 14.0$  Hz, 1H).

**$^{13}\text{C}$  NMR** (101 MHz,  $\text{CDCl}_3$ )  $\delta = 167.9, 167.8, 159.6, 153.4, 135.2, 135.0, 134.8, 131.7, 130.1, 128.7, 128.5, 128.4, 127.8, 127.5, 127.0, 126.8, 126.4, 123.6, 122.4, 115.9, 114.2, 67.1, 65.1, 55.3, 39.6$ .

**HRMS** (ESI-FT) calcd for  $\text{C}_{31}\text{H}_{25}\text{N}_3\text{O}_3\text{S}^+$  ( $[\text{M}+\text{H}]^+$ ) = 520.1689, Found .520.1689.

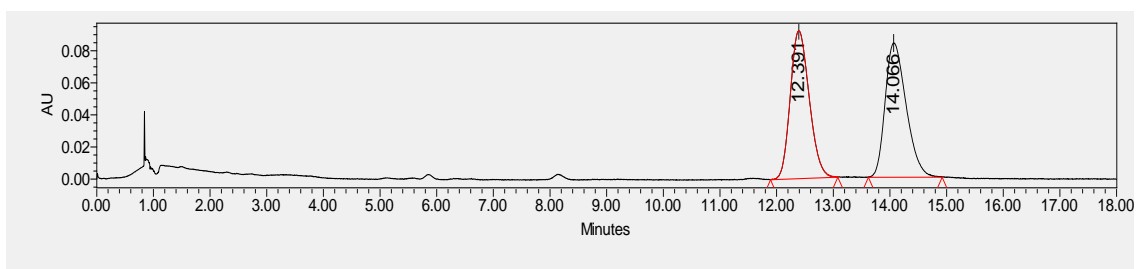

|   | Retention Time | Area    | % Area |
|---|----------------|---------|--------|
| 1 | 12.391         | 2138452 | 49.82  |
| 2 | 14.066         | 2153483 | 50.18  |

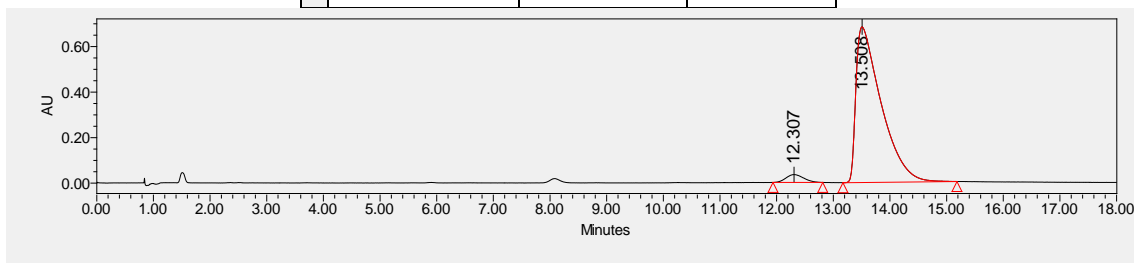

|   | Retention Time | Area     | % Area |
|---|----------------|----------|--------|
| 1 | 12.307         | 746958   | 3.42   |
| 2 | 13.508         | 21073901 | 96.58  |

***N*-((2*R*,3*S*)-3-benzyl-4-oxo-2-(4-(trifluoromethyl)phenyl)-3,4-dihydro-2*H*-benzo[4,5]thiazolo[3,2-*a*]pyrimidin-3-yl)benzamide (3*a*)**

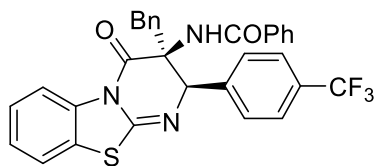

White solid; m.p. 97–101°C; 51.2 mg, 92% yield, 82% ee, 94:6 d.r.;  $[\alpha]_D^{23} = +285.62$  ( $c = 0.80$  in  $\text{CH}_2\text{Cl}_2$ ).

**UPCC** (chiral OD-3 column),  $\text{CO}_2/\text{EtOH} = 93/7$ , flow rate = 1.5 mL/min,  $\lambda = 254$  nm,  $t_{\text{major isomer}} = 7.95$  min (major), 7.09 min (minor);  $t_{\text{minor isomer}} = 12.93$  min (major),  $t_{\text{minor isomer}} = 15.02$  min (minor).

**IR** (neat): 3403, 1645, 1463, 1370, 1325 and 1121  $\text{cm}^{-1}$ .

**$^1\text{H NMR}$**  (400 MHz,  $\text{CDCl}_3$ )  $\delta = 8.07 - 8.02$  (m, 1H), 7.56 – 7.44 (m, 6H), 7.44 – 7.40 (m, 2H), 7.40 – 7.32 (m, 4H), 7.23 – 7.18 (m, 1H), 7.16 – 7.10 (m, 2H), 6.98 (s, 1H), 6.91 – 6.86 (m, 2H), 6.23 (s, 1H), 4.34 (d,  $J = 14.0$  Hz, 1H), 3.50 (d,  $J = 14.0$  Hz, 1H).

**$^{13}\text{C NMR}$**  (101 MHz,  $\text{CDCl}_3$ )  $\delta = 167.9$ , 167.4, 154.6, 140.1, 134.7 (d,  $J = 4.4$  Hz), 134.5, 132.0, 130.1, 128.8, 128.5, 127.8, 127.7, 127.2, 126.8, 126.6, 125.7 (q,  $J = 3.6$  Hz), 123.4, 122.5, 116.0, 67.1, 64.6, 39.8.

**$^{19}\text{F}\{^1\text{H}\}$  NMR** (376 MHz,  $\text{CDCl}_3$ )  $\delta = -62.7$ .

**HRMS** (ESI-FT) calcd for  $\text{C}_{31}\text{H}_{23}\text{F}_3\text{N}_3\text{O}_2\text{S}^+$  ( $[\text{M}+\text{H}^+]$ ) = 558.1458, Found 558.1458.

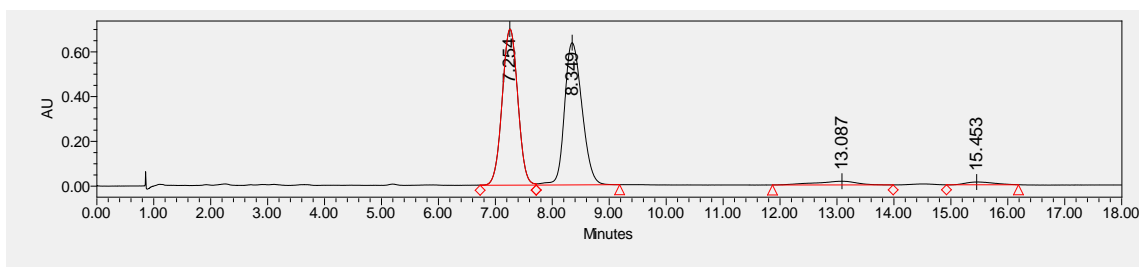

|   | Retention Time | Area     | % Area |
|---|----------------|----------|--------|
| 1 | 7.254          | 13265399 | 47.35  |
| 2 | 8.349          | 13486592 | 48.14  |
| 3 | 13.087         | 828628   | 2.96   |
| 4 | 15.453         | 433151   | 1.55   |

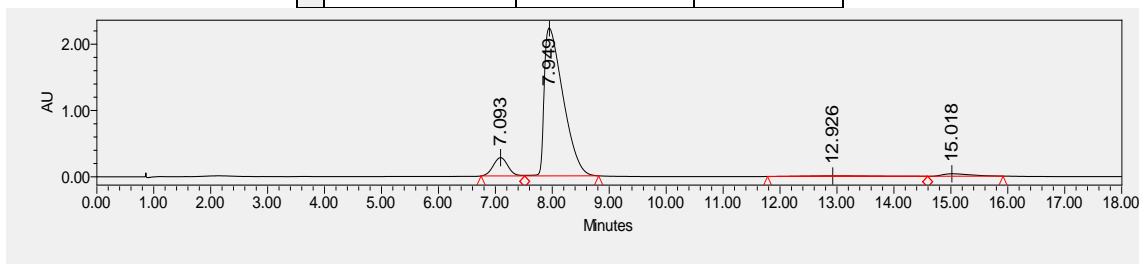

|   | Retention Time | Area     | % Area |
|---|----------------|----------|--------|
| 1 | 7.093          | 4961149  | 8.59   |
| 2 | 7.949          | 51028902 | 88.34  |
| 3 | 12.926         | 542828   | 0.94   |
| 4 | 15.018         | 1228296  | 2.13   |

***N*-((2*R*,3*S*)-3-benzyl-2-(3-fluorophenyl)-4-oxo-3,4-dihydro-2*H*-benzo[4,5]thiazolo[3,2-*a*]pyrimidin-3-yl)benzamide (3sa)**

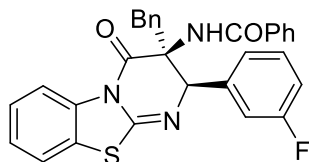

White solid; m.p. 86–91 °C; 49.7 mg, 98% yield, 82% ee, >19:1 d.r.;  $[\alpha]_D^{23} = +393.68$  ( $c = 0.74$  in  $\text{CH}_2\text{Cl}_2$ ).

**UPCC** (chiral AS-3 column),  $\text{CO}_2/i\text{PrOH} = 90/10$ , flow rate = 1.5 mL/min,  $\lambda = 214$  nm,  $t_R$  (major) = 6.18 min,  $t_R$  (minor) = 5.08 min.

**IR** (neat): 3403, 1647, 1463, 1370 and 1188  $\text{cm}^{-1}$ .

**$^1\text{H}$  NMR** (400 MHz,  $\text{CDCl}_3$ )  $\delta = 8.09 - 7.97$  (m, 1H), 7.53 – 7.41 (m, 4H), 7.40 – 7.31 (m, 4H), 7.23 – 7.05 (m, 5H), 7.03 – 6.97 (m, 1H), 6.96 (s, 1H), 6.93 – 6.82 (m, 3H), 6.15 (s, 1H), 4.34 (d,  $J = 14.0$  Hz, 1H), 3.48 (d,  $J = 14.0$  Hz, 1H)..

**$^{13}\text{C}$  NMR** (101 MHz,  $\text{CDCl}_3$ )  $\delta = 167.9, 167.5, 162.8$  (d,  $J = 246.8$  Hz), 154.3, 138.4 (d,  $J = 6.9$  Hz), 135.0, 134.7, 134.7, 131.8, 130.3 (d,  $J = 8.3$  Hz), 130.1, 128.8.0, 128.5, 127.6, 127.1, 126.8, 126.6, 123.4, 123.1 (d,  $J = 2.9$  Hz), 122.4, 116.0, 115.6 (d,  $J = 21.1$  Hz), 114.4 (d,  $J = 22.1$  Hz), 67.1, 64.7, 39.7.

**$^{19}\text{F}\{^1\text{H}\}$  NMR** (376 MHz,  $\text{CDCl}_3$ )  $\delta = -112.2$ .

**HRMS** (ESI-FT) calcd for  $\text{C}_{30}\text{H}_{23}\text{FN}_3\text{O}_2\text{S}^+$  ( $[\text{M}+\text{H}^+]$ ) = 508.1490, Found 508.1490.

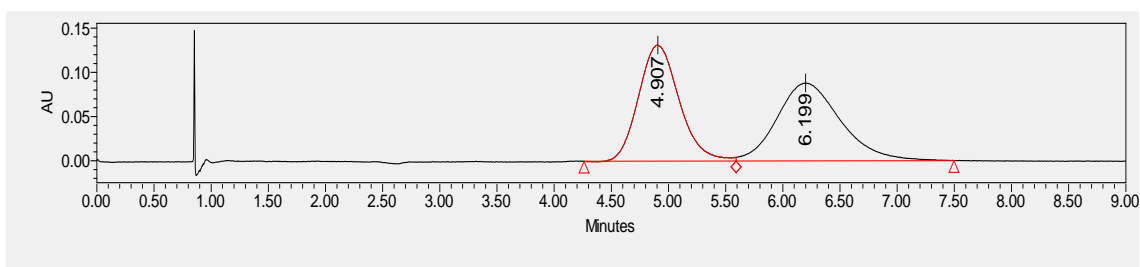

|   | Retention Time | Area    | % Area |
|---|----------------|---------|--------|
| 1 | 4.907          | 3247018 | 48.84  |
| 2 | 6.199          | 3400869 | 51.16  |

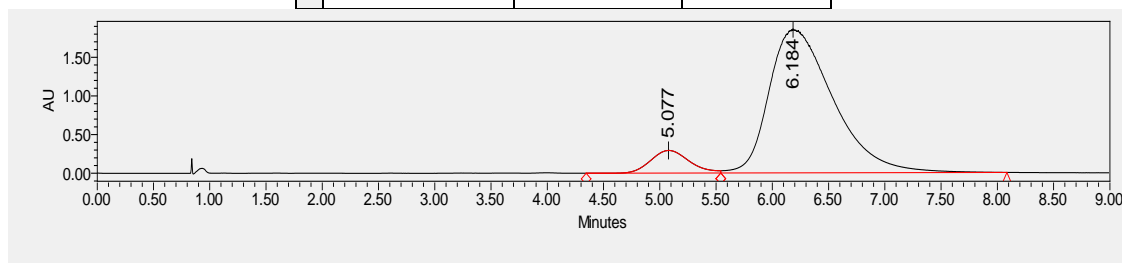

|   | Retention Time | Area     | % Area |
|---|----------------|----------|--------|
| 1 | 5.077          | 6952035  | 8.65   |
| 2 | 6.184          | 73416663 | 91.35  |

***N*-((2*R*,3*S*)-3-benzyl-2-(2-fluorophenyl)-4-oxo-3,4-dihydro-2*H*-benzo[4,5]thiazolo[3,2-*a*]pyrimidin-3-yl)benzamide (3*ta*)**

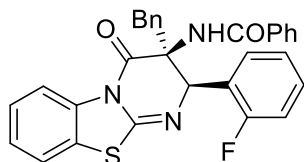

White solid; m.p. 97–101 °C; 51.4 mg, 99% yield, 87% ee, >19:1 d.r.;  $[\alpha]_D^{23} = +416.67$  ( $c = 0.77$  in  $\text{CH}_2\text{Cl}_2$ ).

**UPCC** (chiral AS-3 column),  $\text{CO}_2/\text{iPrOH} = 90/10$ , flow rate = 1.5 mL/min,  $\lambda = 240$  nm,  $t_R$  (major) = 8.48 min,  $t_R$  (minor) = 6.58 min.

**IR** (neat): 3402, 1651, 1463, 1375 and 1190  $\text{cm}^{-1}$ .

**$^1\text{H}$  NMR** (400 MHz,  $\text{CDCl}_3$ )  $\delta = 8.09 - 8.04$  (m, 1H), 7.51 – 7.46 (m, 1H), 7.45 – 7.39 (m, 4H), 7.35 – 7.27 (m, 4H), 7.24 – 7.12 (m, 5H), 7.06 – 7.00 (m, 1H), 6.95 – 6.88 (m, 3H), 6.14 (s, 1H), 4.31 (d,  $J = 14.0$  Hz, 1H), 3.44 (d,  $J = 14.0$  Hz, 1H).

**$^{13}\text{C}$  NMR** (101 MHz,  $\text{CDCl}_3$ )  $\delta = 167.4$ , 167.4, 161.4 (d,  $J = 245.9$  Hz), 153.6, 135.1, 134.9, 134.6, 132.3 (d,  $J = 5.0$  Hz), 131.7, 130.3 (d,  $J = 8.5$  Hz), 130.2, 128.7, 128.4, 127.6, 126.9, 126.7, 126.2, 124.4 (d,  $J = 3.2$  Hz), 123.9 (d,  $J = 15.0$  Hz), 123.2, 122.2, 116.0, 115.7 (d,  $J = 22.5$  Hz), 67.4, 63.0, 40.9.

**$^{19}\text{F}\{^1\text{H}\}$  NMR** (376 MHz,  $\text{CDCl}_3$ )  $\delta = -112.4$ .

**HRMS** (ESI-FT) calcd for  $\text{C}_{30}\text{H}_{23}\text{FN}_3\text{O}_2\text{S}^+$  ( $[\text{M}+\text{H}^+]$ ) = 508.1490, Found 508.1490.

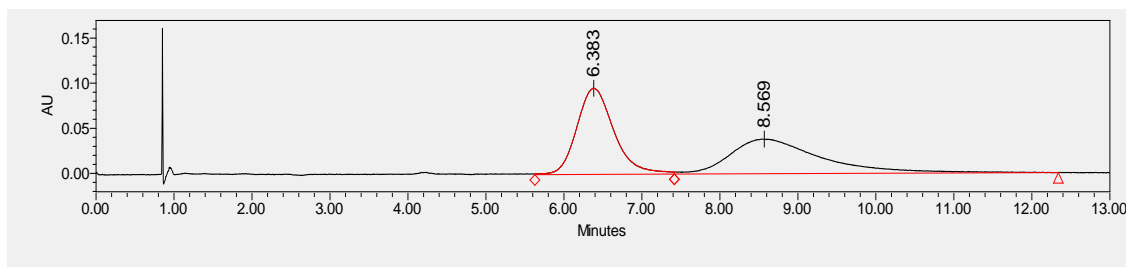

|   | Retention Time | Area    | % Area |
|---|----------------|---------|--------|
| 1 | 6.383          | 3153963 | 50.13  |
| 2 | 8.569          | 3137903 | 49.87  |

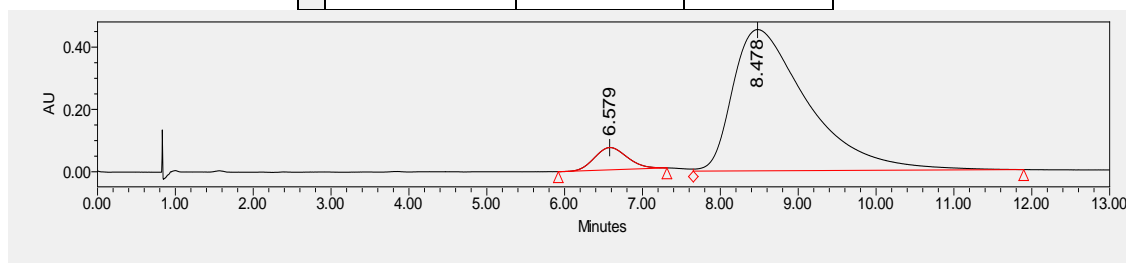

|   | Retention Time | Area     | % Area |
|---|----------------|----------|--------|
| 1 | 6.579          | 2083694  | 6.43   |
| 2 | 8.478          | 30312368 | 93.57  |

***N*-((2*R*,3*S*)-3-benzyl-2-(furan-2-yl)-4-oxo-3,4-dihydro-2*H*-benzo[4,5]thiazolo[3,2-*a*]pyrimidin-3-yl)benzamide (3ua)**

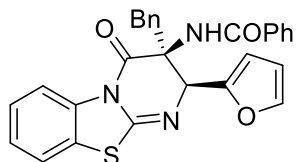

White solid; m.p. 88–90 °C; 49.3 mg, 99% yield, 97% ee, >19:1 d.r.;  $[\alpha]_{23}^D = +578.57$  ( $c = 0.78$  in  $\text{CH}_2\text{Cl}_2$ ).

**UPCC** (chiral OD-3 column),  $\text{CO}_2/\text{MeOH} = 90/10$ , flow rate = 1.5 mL/min,  $\lambda = 220$  nm,  $t_R$  (major) = 8.91 min,  $t_R$  (minor) = 7.58 min.

**IR** (neat): 3406, 1643, 1463, 1366 and 1189  $\text{cm}^{-1}$ .

**$^1\text{H}$  NMR** (400 MHz,  $\text{CDCl}_3$ )  $\delta = 8.12 - 8.06$  (m, 1H), 7.55 – 7.51 (m, 2H), 7.51 – 7.45 (m, 1H), 7.44 – 7.41 (m, 1H), 7.41 – 7.35 (m, 2H), 7.35 – 7.27 (m, 2H), 7.23 – 7.17 (m, 2H), 7.16 – 7.10 (m, 2H), 7.02 (s, 1H), 6.91 – 6.87 (m, 2H), 6.38 – 6.36 (m, 1H), 6.26 (s, 1H), 6.19 – 6.17 (m, 1H), 4.18 (d,  $J = 14.0$  Hz, 1H), 3.44 (d,  $J = 14.0$  Hz, 1H)

**$^{13}\text{C}$  NMR** (101 MHz,  $\text{CDCl}_3$ )  $\delta = 167.7, 167.6, 155.4, 149.4, 142.8, 135.2, 134.9, 134.7, 131.8, 130.1, 128.7, 128.4, 127.5, 126.9, 126.9, 126.2, 123.4, 122.2, 116.0, 110.4, 109.7, 63.3, 60.7, 39.1$ .

**HRMS** (ESI-FT) calcd for  $\text{C}_{28}\text{H}_{22}\text{N}_3\text{O}_3\text{S}^+$  ( $[\text{M}+\text{H}]^+$ ) = 480.1376, Found 480.1376.

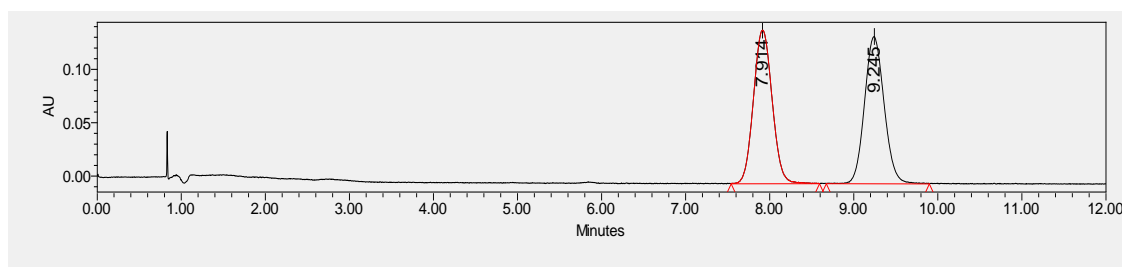

|   | Retention Time | Area    | % Area |
|---|----------------|---------|--------|
| 1 | 7.914          | 2223789 | 49.82  |
| 2 | 9.245          | 2240112 | 50.18  |

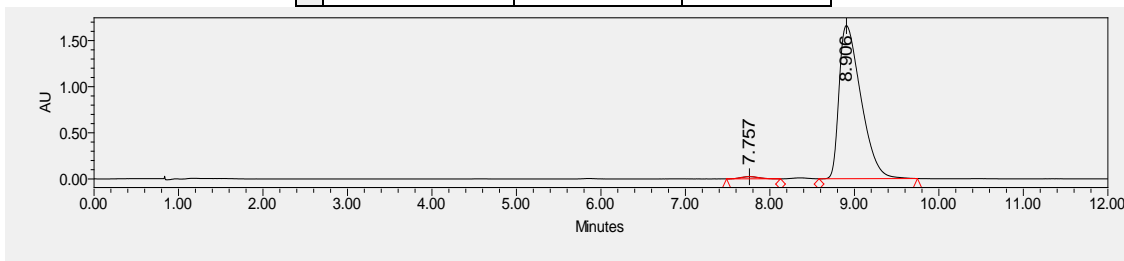

|   | Retention Time | Area     | % Area |
|---|----------------|----------|--------|
| 1 | 7.757          | 348039   | 1.15   |
| 2 | 8.906          | 29797618 | 98.85  |

***N*-((2*R*,3*S*)-3-benzyl-4-oxo-2-(thiophen-2-yl)-3,4-dihydro-2*H*-benzo[4,5]thiazolo[3,2-*a*]pyrimidin-3-yl)benzamide (3va)**

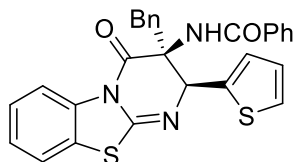

White solid; m.p. 91–93 °C; 48.2 mg, 97% yield, 88% ee, >19:1 d.r.;  $[\alpha]_D^{23} = +423.36$  ( $c = 0.82$  in  $\text{CH}_2\text{Cl}_2$ ).

**UPCC** (chiral AS-3 column),  $\text{CO}_2/\text{MeOH} = 90/10$ , flow rate = 1.5 mL/min,  $\lambda = 254$  nm,  $t_R$  (major) = 5.88 min,  $t_R$  (minor) = 6.45 min.

**IR** (neat): 3405, 1643, 1462, 1364 and 1188  $\text{cm}^{-1}$ .

**$^1\text{H}$  NMR** (400 MHz,  $\text{CDCl}_3$ )  $\delta = 8.10 - 8.04$  (m, 1H), 7.61 – 7.56 (m, 2H), 7.52 – 7.47 (m, 1H), 7.47 – 7.43 (m, 1H), 7.42 – 7.37 (m, 2H), 7.35 – 7.29 (m, 2H), 7.22 – 7.17 (m, 1H), 7.16 – 7.09 (m, 3H), 7.07 – 7.01 (m, 2H), 6.91 – 6.86 (m, 2H), 6.85 – 6.82 (m, 1H), 6.53 (s, 1H), 4.26 (d,  $J = 14.0$  Hz, 1H), 3.48 (d,  $J = 14.0$  Hz, 1H).

**$^{13}\text{C}$  NMR** (101 MHz,  $\text{CDCl}_3$ )  $\delta = 167.8, 167.4, 154.9, 138.0, 135.0, 134.8, 134.8, 131.8, 130.1, 128.8, 128.4, 127.5, 127.0, 127.0, 127.0, 126.9, 126.5, 125.4, 123.5, 122.4, 116.1, 65.2, 62.4, 39.0$ .

**HRMS** (ESI-FT) calcd for  $\text{C}_{28}\text{H}_{22}\text{N}_3\text{O}_2\text{S}_2^+$  ( $[\text{M}+\text{H}]^+$ ) = 496.1148, Found 496.1148.

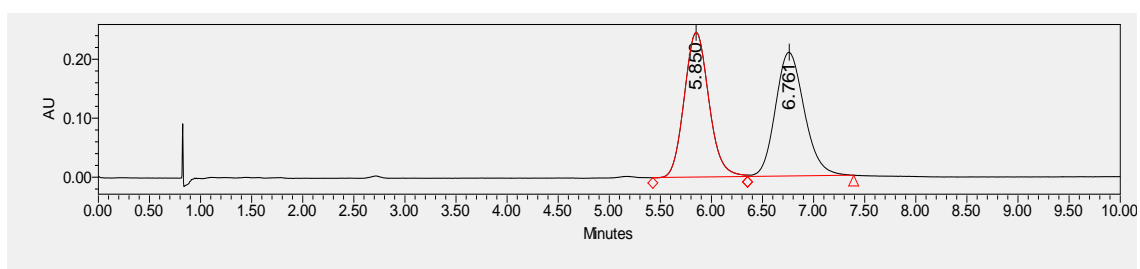

|   | Retention Time | Area    | % Area |
|---|----------------|---------|--------|
| 1 | 5.850          | 4090106 | 49.91  |
| 2 | 6.761          | 4105069 | 50.09  |

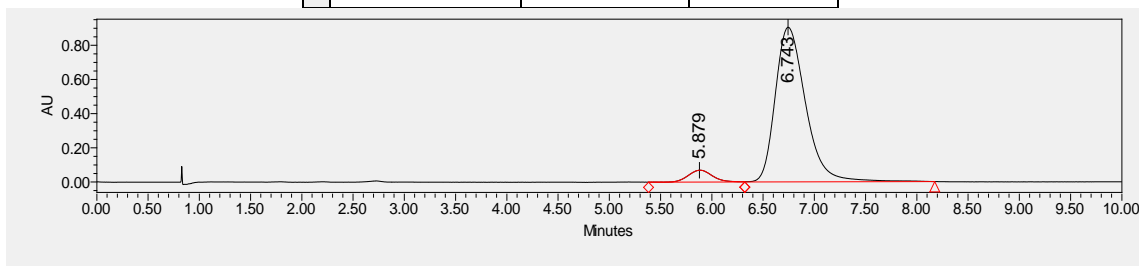

|   | Retention Time | Area     | % Area |
|---|----------------|----------|--------|
| 1 | 5.879          | 1149528  | 5.82   |
| 2 | 6.743          | 18591334 | 94.18  |

***N*-((2*R*,3*S*)-3-benzyl-4-oxo-2-phenyl-3,4-dihydro-2*H*-benzo[4,5]oxazolo[3,2-*a*]pyrimidin-3-yl)benzamide (3wa)**

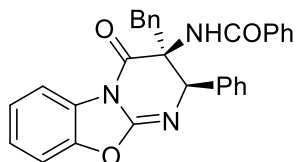

White solid; m.p. 99–102 °C; 43.8 mg, 92% yield, 90% ee, >19:1 d.r.;  $[\alpha]_D^{23} = +402.56$  ( $c = 0.78$  in  $\text{CH}_2\text{Cl}_2$ ).

**UPCC** (chiral OJ-3 column),  $\text{CO}_2/\text{MeOH} = 90/10$ , flow rate = 1.5 mL/min,  $\lambda = 220$  nm,  $t_R$  (major) = 2.87 min,  $t_R$  (minor) = 3.45 min.

**IR** (neat): 3404, 1730, 1663, 1479 and 1395  $\text{cm}^{-1}$ .

**$^1\text{H}$  NMR** (400 MHz,  $\text{CDCl}_3$ )  $\delta = 7.76 - 7.72$  (m, 1H), 7.47 – 7.41 (m, 3H), 7.36 – 7.31 (m, 4H), 7.31 – 7.27 (m, 1H), 7.27 – 7.24 (m, 2H), 7.22 – 7.18 (m, 4H), 7.17 – 7.12 (m, 2H), 6.94 – 6.89 (m, 2H), 6.77 (s, 1H), 6.10 (s, 1H), 4.38 (d,  $J = 14.0$  Hz, 1H), 3.46 (d,  $J = 14.0$  Hz, 1H).

**$^{13}\text{C}$  NMR** (101 MHz,  $\text{CDCl}_3$ )  $\delta = 167.9, 166.7, 149.5, 145.4, 136.6, 135.1, 134.7, 131.7, 130.1, 128.8, 128.7, 128.5, 128.4, 127.6, 127.2, 126.8, 126.3, 126.2, 124.7, 113.5, 110.8, 65.1, 39.9$ .

**HRMS** (ESI-FT) calcd for  $\text{C}_{30}\text{H}_{24}\text{N}_3\text{O}_3^+$  ( $[\text{M}+\text{H}^+]$ ) = 474.1812, Found 474.1812.

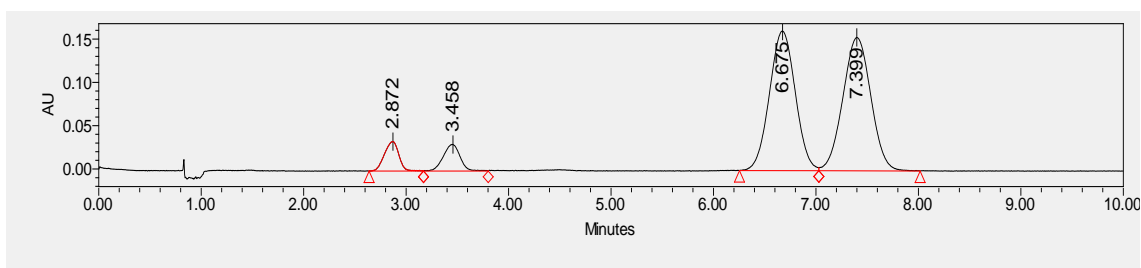

|   | Retention Time | Area    | % Area |
|---|----------------|---------|--------|
| 1 | 2.872          | 333482  | 5.18   |
| 2 | 3.458          | 351637  | 5.47   |
| 3 | 6.675          | 2825176 | 43.91  |
| 4 | 7.399          | 2923402 | 45.44  |

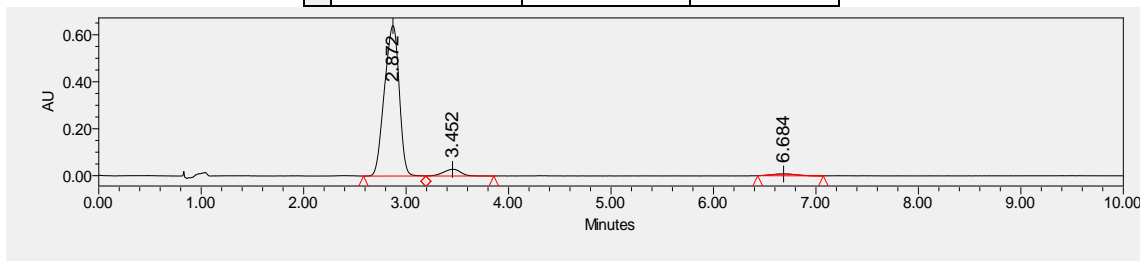

|   | Retention Time | Area    | % Area |
|---|----------------|---------|--------|
| 1 | 2.872          | 6404839 | 93.24  |
| 2 | 3.452          | 337571  | 4.91   |
| 3 | 6.684          | 127002  | 1.85   |

***N*-((2*R*,3*S*)-3-(4-fluorobenzyl)-4-oxo-2-phenyl-3,4-dihydro-2*H*-benzo[4,5]thiazolo[3,2-*a*]pyrimidin-3-yl)benzamide (3ab)**

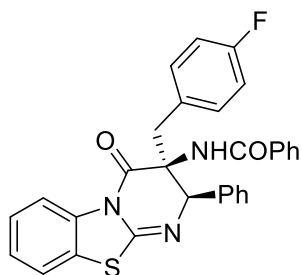

White solid; m.p. 97–101 °C; 50.7 mg, 99% yield, 98% ee, >19:1 d.r.;  $[\alpha]_D^{23} = +478.92$  ( $c = 0.91$  in  $\text{CH}_2\text{Cl}_2$ ).

**UPCC** (chiral AS-3 column),  $\text{CO}_2/\text{MeOH} = 90/10$ , flow rate = 1.5 mL/min,  $\lambda = 215$  nm,  $t_R$  (major) = 4.35 min,  $t_R$  (minor) = 3.75 min.

**IR** (neat): 3405, 1647, 1511, 1463, 1371 and 1186  $\text{cm}^{-1}$ .

**$^1\text{H}$  NMR** (400 MHz,  $\text{CDCl}_3$ )  $\delta = 8.07 - 8.01$  (m, 1H), 7.49 – 7.43 (m, 4H), 7.38 – 7.32 (m, 4H), 7.28 – 7.23 (m, 2H), 7.22 – 7.18 (m, 3H), 6.90 (s, 1H), 6.88 – 6.78 (m, 4H), 6.11 (s, 1H), 4.35 (d,  $J = 14.0$  Hz, 1H), 3.47 (d,  $J = 14.0$  Hz, 1H).

**$^{13}\text{C}$  NMR** (101 MHz,  $\text{CDCl}_3$ )  $\delta = 167.9, 167.7, 162.3$  (d,  $J = 246.0$  Hz), 153.7, 135.8, 135.0, 134.7, 131.8, 131.6 (d,  $J = 8.1$  Hz), 130.7 (d,  $J = 3.3$  Hz), 128.8, 128.8, 128.6, 127.2, 127.1, 126.8, 126.5, 123.6, 122.5, 115.9, 115.4 (d,  $J = 21.3$  Hz), 67.6, 64.8, 38.9.

**$^{19}\text{F}\{^1\text{H}\}$  NMR** (376 MHz,  $\text{CDCl}_3$ )  $\delta = -114.9$ .

**HRMS** (ESI-FT) calcd for  $\text{C}_{30}\text{H}_{23}\text{FN}_3\text{O}_2\text{S}^+$  ( $[\text{M}+\text{H}^+]$ ) = 508.1490, Found 508.1497.

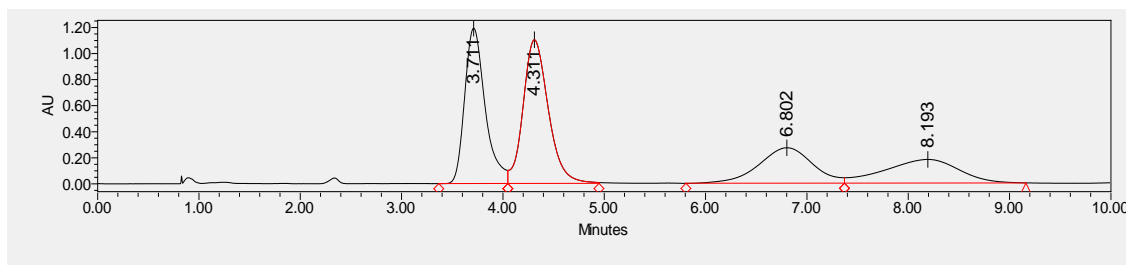

|   | Retention Time | Area     | % Area |
|---|----------------|----------|--------|
| 1 | 3.711          | 16761320 | 30.50  |
| 2 | 4.311          | 19018418 | 34.61  |
| 3 | 6.802          | 10005573 | 18.21  |
| 4 | 8.193          | 9165739  | 16.68  |

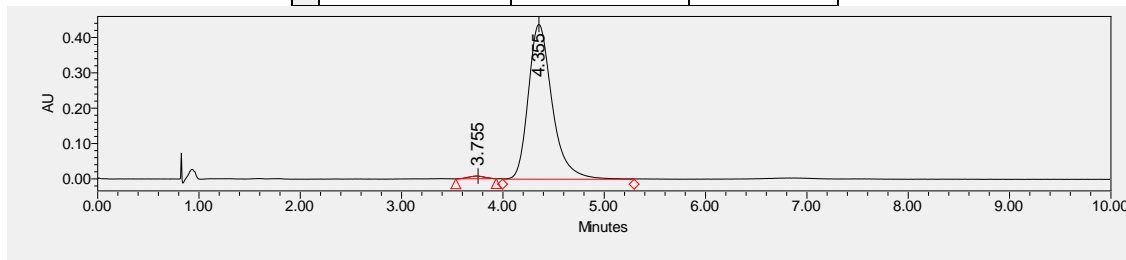

|   | Retention Time | Area    | % Area |
|---|----------------|---------|--------|
| 1 | 3.755          | 83326   | 1.15   |
| 2 | 4.355          | 7147207 | 98.85  |



***N*-((2*R*,3*S*)-3-(4-chlorobenzyl)-4-oxo-2-phenyl-3,4-dihydro-2*H*-benzo[4,5]thiazolo[3,2-*a*]pyrimidin-3-yl)benzamide (3ac)**

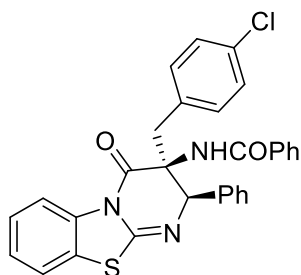

White solid; m.p. 98–103 °C; 50.7 mg, 97% yield, 96% ee, >19:1 d.r.;  $[\alpha]^{22}_D = +485.42$  ( $c = 0.94$  in  $\text{CH}_2\text{Cl}_2$ ).

**UPCC** (chiral AS-3 column),  $\text{CO}_2/\text{MeOH} = 90/10$ , flow rate = 1.5 mL/min,  $\lambda = 220$  nm,  $t_R$  (major) = 5.87 min,  $t_R$  (minor) = 4.98 min.

**IR** (neat): 3403, 1647, 1462, 1370 and 1185  $\text{cm}^{-1}$ .

**$^1\text{H}$  NMR** (400 MHz,  $\text{CDCl}_3$ )  $\delta = 8.09 - 8.00$  (m, 1H), 7.49 – 7.42 (m, 4H), 7.38 – 7.32 (m, 4H), 7.28 – 7.23 (m, 2H), 7.22 – 7.18 (m, 3H), 7.12 – 7.07 (m, 2H), 6.89 (s, 1H), 6.84 – 6.80 (m, 2H), 6.11 (s, 1H), 4.36 (d,  $J = 14.0$  Hz, 1H), 3.46 (d,  $J = 14.0$  Hz, 1H).

**$^{13}\text{C}$  NMR** (101 MHz,  $\text{CDCl}_3$ )  $\delta = 167.9, 167.6, 153.7, 135.7, 134.9, 134.7, 133.5, 133.4, 131.8, 131.4, 128.8, 128.8, 128.6, 128.6, 127.2, 127.1, 126.7, 126.6, 123.5, 122.5, 115.9, 67.6, 64.8, 39.0$ .

**HRMS** (ESI-FT) calcd for  $\text{C}_{30}\text{H}_{23}^{35}\text{ClN}_3\text{O}_2\text{S}^+$  ( $[\text{M}+\text{H}^+]$ ) = 524.1194, Found 524.1200,  $\text{C}_{30}\text{H}_{23}^{37}\text{ClN}_3\text{O}_2\text{S}^+$  ( $[\text{M}+\text{H}^+]$ ) = 526.1165, Found 526.1174.

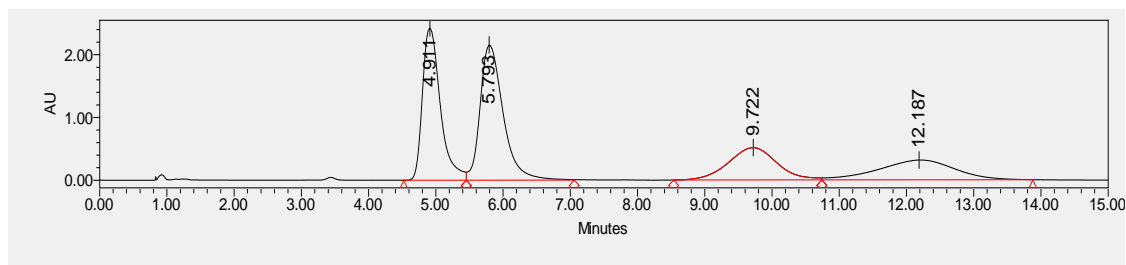

|   | Retention Time | Area     | % Area |
|---|----------------|----------|--------|
| 1 | 4.911          | 44810259 | 30.58  |
| 2 | 5.793          | 51200854 | 34.94  |
| 3 | 9.722          | 25750479 | 17.57  |
| 4 | 12.187         | 24768589 | 16.90  |

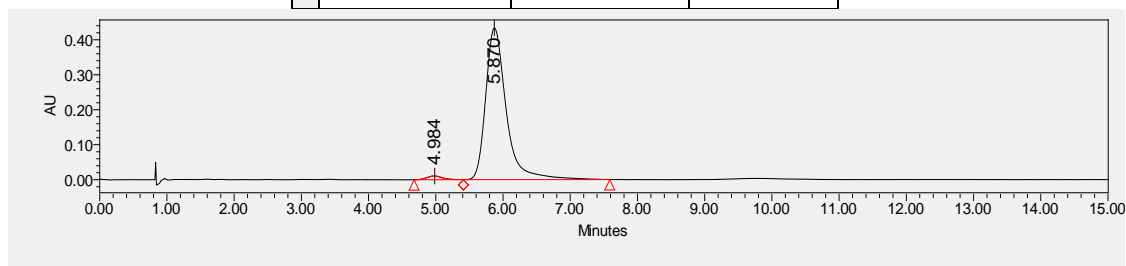

|   | Retention Time | Area    | % Area |
|---|----------------|---------|--------|
| 1 | 4.984          | 176014  | 1.87   |
| 2 | 5.870          | 9219196 | 98.13  |

***N*-((2*R*,3*S*)-3-(4-bromobenzyl)-4-oxo-2-phenyl-3,4-dihydro-2*H*-benzo[4,5]thiazolo[3,2-*a*]pyrimidin-3-yl)benzamide (3ad)**

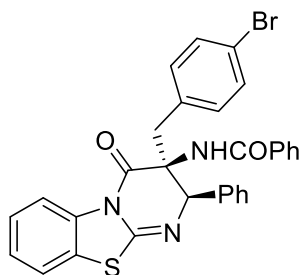

White solid; m.p. 107–112 °C; 55.6 mg, 98% yield, 97% ee, >19:1 d.r.;  $[\alpha]_D^{23} = +439.83$  ( $c = 1.07$  in  $\text{CH}_2\text{Cl}_2$ ).

**UPCC** (chiral AS-3 column),  $\text{CO}_2/\text{MeOH} = 90/10$ , flow rate = 1.5 mL/min,  $\lambda = 220$  nm,  $t_R$  (major) = 7.02 min,  $t_R$  (minor) = 5.87 min.

**IR** (neat): 3403, 1647, 1462, 1370 and 1185  $\text{cm}^{-1}$ .

**$^1\text{H}$  NMR** (400 MHz,  $\text{CDCl}_3$ )  $\delta = 8.07 - 8.00$  (m, 1H), 7.48 – 7.42 (m, 4H), 7.37 – 7.31 (m, 4H), 7.26 – 7.22 (m, 4H), 7.21 – 7.17 (m, 3H), 6.88 (s, 1H), 6.77 – 6.73 (m, 2H), 6.10 (s, 1H), 4.34 (d,  $J = 14.0$  Hz, 1H), 3.43 (d,  $J = 14.0$  Hz, 1H).

**$^{13}\text{C}$  NMR** (101 MHz,  $\text{CDCl}_3$ )  $\delta = 167.9, 167.6, 153.7, 135.6, 134.9, 134.7, 133.9, 131.8, 131.7, 131.6, 128.8, 128.8, 128.6, 127.2, 127.1, 126.7, 126.6, 123.5, 122.5, 121.6, 115.9, 67.6, 64.7, 39.1$ .

**HRMS** (ESI-FT) calcd for  $\text{C}_{30}\text{H}_{23}^{79}\text{BrN}_3\text{O}_2\text{S}^+$  ( $[\text{M}+\text{H}^+]$ ) = 568.0689, Found 568.0697,  $\text{C}_{30}\text{H}_{23}^{81}\text{BrN}_3\text{O}_2\text{S}^+$  ( $[\text{M}+\text{H}^+]$ ) = 570.0668, Found 570.0677.

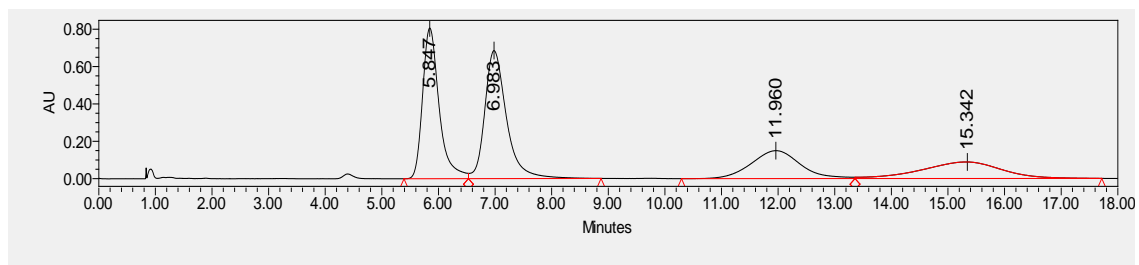

|   | Retention Time | Area     | % Area |
|---|----------------|----------|--------|
| 1 | 5.847          | 16430255 | 31.35  |
| 2 | 6.983          | 18200419 | 34.73  |
| 3 | 11.960         | 9068321  | 17.30  |
| 4 | 15.342         | 8712170  | 16.62  |

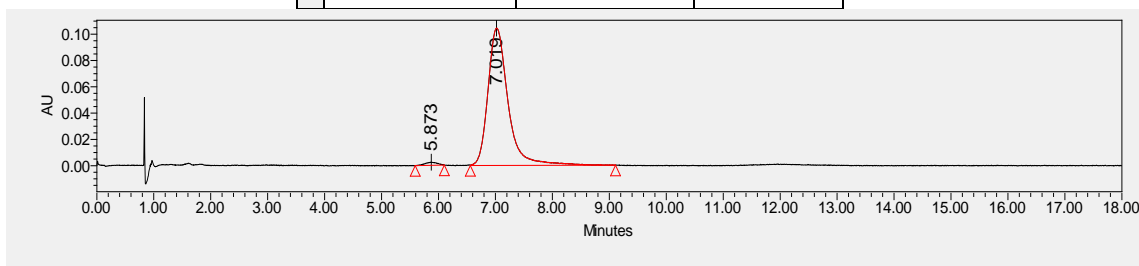

|   | Retention Time | Area    | % Area |
|---|----------------|---------|--------|
| 1 | 5.873          | 35137   | 1.36   |
| 2 | 7.019          | 2552004 | 98.64  |

***N*-{(2*R*,3*S*)-3-methyl-4-oxo-2-phenyl-3,4-dihydro-2*H*-benzo[4,5]thiazolo[3,2-*a*]pyrimidin-3-yl}benzamide (3ae)**

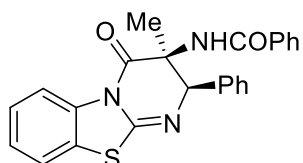

White solid; m.p. 87–92 °C; 38.9 mg, 94% yield, 94% ee, >19:1 d.r.;  $[\alpha]_D^{23} = +566.06$  ( $c = 0.71$  in  $\text{CH}_2\text{Cl}_2$ ).

**UPCC** (chiral AD-3 column),  $\text{CO}_2/\text{MeOH} = 90/10$ , flow rate = 1.5 mL/min,  $\lambda = 220$  nm,  $t_R$  (major) = 14.46 min,  $t_R$  (minor) = 27.70 min.

**IR** (neat): 3406, 1648, 1462, 1349 and 1181  $\text{cm}^{-1}$ .

**$^1\text{H NMR}$**  (400 MHz,  $\text{CDCl}_3$ )  $\delta = 8.29 - 8.26$  (m, 1H), 7.54 – 7.52 (m, 1H), 7.52 – 7.50 (m, 1H), 7.48 – 7.43 (m, 1H), 7.42 – 7.39 (m, 1H), 7.38 – 7.33 (m, 3H), 7.33 – 7.30 (m, 1H), 7.30 – 7.27 (m, 1H), 7.26 – 7.24 (m, 1H), 7.23 – 7.20 (m, 3H), 7.08 (s, 1H), 5.86 (s, 1H), 2.05 (s, 3H).

**$^{13}\text{C NMR}$**  (101 MHz,  $\text{CDCl}_3$ )  $\delta = 169.6, 167.3, 154.2, 136.0, 135.2, 134.8, 131.7, 128.8, 128.6, 128.5, 127.3, 126.9, 126.8, 126.4, 123.7, 122.2, 116.4, 67.3, 59.3, 22.7$ .

**HRMS** (ESI-FT) calcd for  $\text{C}_{24}\text{H}_{20}\text{N}_3\text{O}_2\text{S}^+$  ( $[\text{M}+\text{H}^+]$ ) = 414.1271, Found 414.1263.

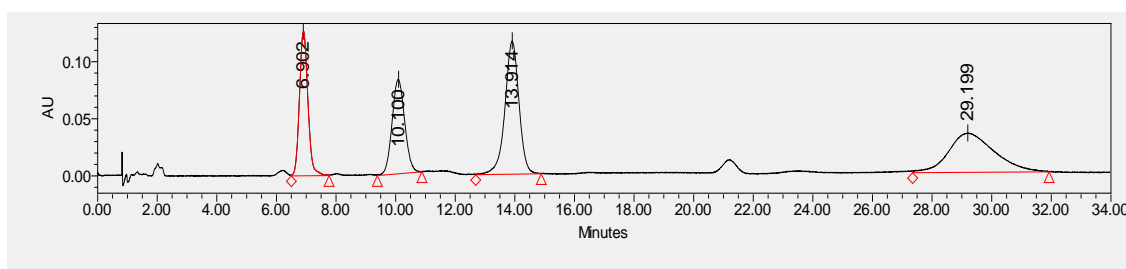

|   | Retention Time | Area    | % Area |
|---|----------------|---------|--------|
| 1 | 6.902          | 2481859 | 20.02  |
| 2 | 10.100         | 2437804 | 19.66  |
| 3 | 13.914         | 3811147 | 30.74  |
| 4 | 29.199         | 3668666 | 29.59  |

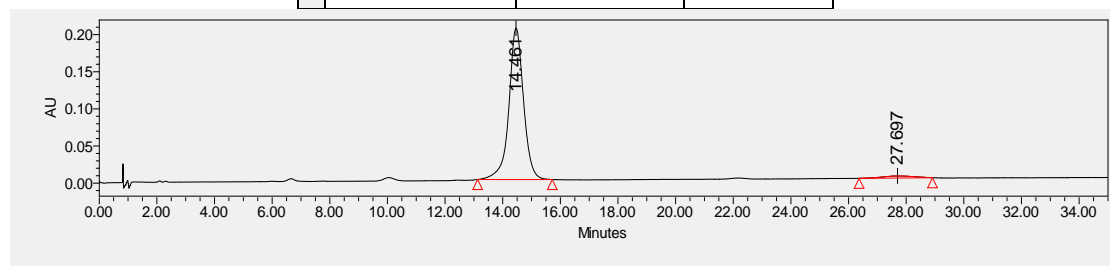

|   | Retention Time | Area    | % Area |
|---|----------------|---------|--------|
| 1 | 14.461         | 7195395 | 97.10  |
| 2 | 27.697         | 214612  | 2.90   |

***N*-((2*R*,3*S*)-3-ethyl-4-oxo-2-phenyl-3,4-dihydro-2*H*-benzo[4,5]thiazolo[3,2-*a*]pyrimidin-3-yl)benzamide (3af)**

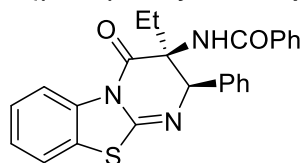

White solid; m.p. 86–90 °C; 38.6 mg, 90% yield, 94% ee, >19:1 d.r.;  $[\alpha]_D^{23} = +610.34$  ( $c = 0.75$  in  $\text{CH}_2\text{Cl}_2$ ).

**UPCC** (chiral ODH column),  $\text{CO}_2/\text{MeOH} = 80/20$ , flow rate = 1.0 mL/min,  $\lambda = 221$  nm,  $t_R$  (major) = 8.28 min,  $t_R$  (minor) = 9.34 min.

**IR** (neat): 3409, 1650, 1462, 1371 and 1178  $\text{cm}^{-1}$ .

**$^1\text{H}$  NMR** (400 MHz,  $\text{CDCl}_3$ )  $\delta = 8.26 - 8.22$  (m, 1H), 7.54 – 7.50 (m, 2H), 7.48 – 7.44 (m, 1H), 7.42 – 7.39 (m, 1H), 7.39 – 7.33 (m, 3H), 7.32 – 7.30 (m, 1H), 7.29 – 7.25 (m, 1H), 7.25 – 7.22 (m, 2H), 7.22 – 7.18 (m, 3H), 7.06 (s, 1H), 5.94 (s, 1H), 3.17 – 3.06 (m, 1H), 2.27 – 2.16 (m, 1H), 0.89 (t,  $J = 7.6$  Hz, 3H).

**$^{13}\text{C}$  NMR** (101 MHz,  $\text{CDCl}_3$ )  $\delta = 168.8, 167.2, 153.6, 136.2, 135.0, 134.9, 131.7, 128.8, 128.7, 128.4, 127.2, 126.9, 126.8, 126.3, 123.7, 122.3, 116.0, 67.6, 64.0, 27.2, 8.5$ .

**HRMS** (ESI-FT) calcd for  $\text{C}_{25}\text{H}_{22}\text{N}_3\text{O}_2\text{S}^+$  ( $[\text{M}+\text{H}]^+$ ) = 428.1427, Found 428.1432.

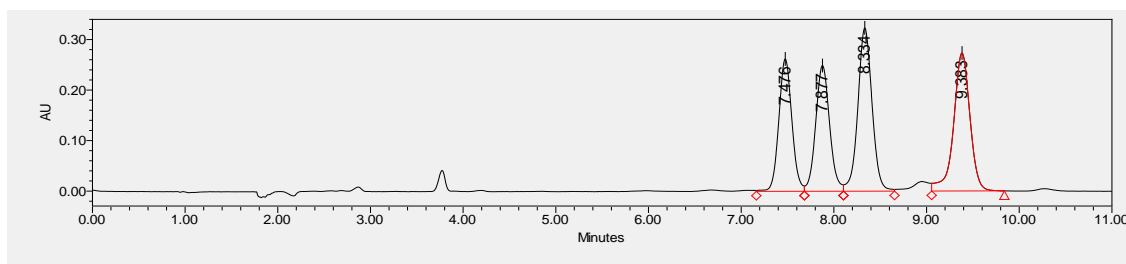

|   | Retention Time | Area    | % Area |
|---|----------------|---------|--------|
| 1 | 7.476          | 2562788 | 21.44  |
| 2 | 7.877          | 2600982 | 21.76  |
| 3 | 8.334          | 3436049 | 28.74  |
| 4 | 9.383          | 3354795 | 28.06  |

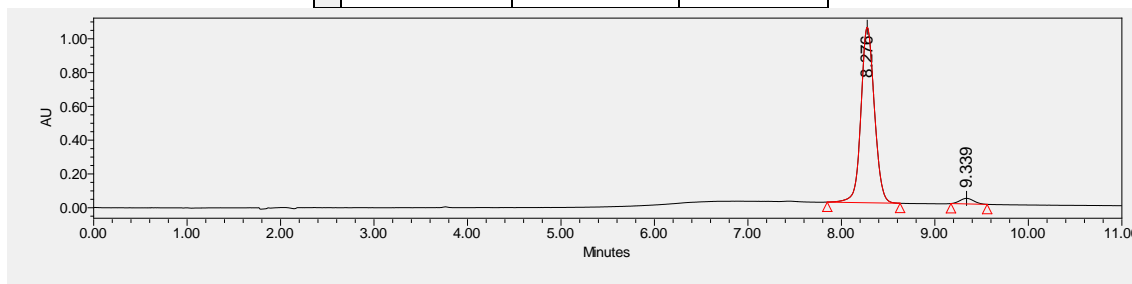

|   | Retention Time | Area     | % Area |
|---|----------------|----------|--------|
| 1 | 8.276          | 10395363 | 96.86  |
| 2 | 9.339          | 336731   | 3.14   |

***N*-{(2*R*,3*S*)-4-oxo-2-phenyl-3-propyl-3,4-dihydro-2*H*-benzo[4,5]thiazolo[3,2-*a*]pyrimidin-3-yl}benzamide (3*g*)**

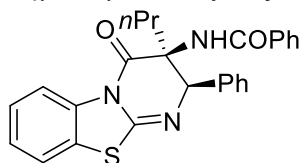

White solid; m.p. 87–92 °C; 37.5 mg, 85% yield, 93% ee, >19:1 d.r.;  $[\alpha]_D^{23} = +611.96$  ( $c = 0.46$  in  $\text{CH}_2\text{Cl}_2$ ).

**UPCC** (chiral AYH column),  $\text{CO}_2/\text{EtOH} = 80/20$ , flow rate = 1.0 mL/min,  $\lambda = 221$  nm,  $t_R$  (major) = 12.11 min,  $t_R$  (minor) = 12.78 min.

**IR** (neat): 3409, 1650, 1462, 1376 and 1177  $\text{cm}^{-1}$ .

**$^1\text{H}$  NMR** (400 MHz,  $\text{CDCl}_3$ )  $\delta = 8.27 - 8.21$  (m, 1H), 7.55 – 7.49 (m, 2H), 7.49 – 7.43 (m, 1H), 7.43 – 7.39 (m, 1H), 7.39 – 7.31 (m, 3H), 7.31 – 7.27 (m, 1H), 7.25 – 7.17 (m, 5H), 7.07 (s, 1H), 5.93 (s, 1H), 3.12 – 2.98 (m, 1H), 2.19 – 2.07 (m, 1H), 1.52 – 1.37 (m, 1H), 1.20 – 1.07 (m, 1H), 0.89 (t,  $J = 7.2$  Hz, 3H).

**$^{13}\text{C}$  NMR** (101 MHz,  $\text{CDCl}_3$ )  $\delta = 169.0, 167.2, 153.6, 136.2, 135.0, 135.0, 131.7, 128.8, 128.7, 128.5, 127.3, 126.9, 126.8, 126.4, 123.8, 122.3, 116.1, 67.8, 36.0, 17.5, 14.0$ .

**HRMS** (ESI-FT) calcd for  $\text{C}_{26}\text{H}_{24}\text{N}_3\text{O}_2\text{S}^+$  ( $[\text{M}+\text{H}]^+$ ) = 442.1584, Found 442.1583.

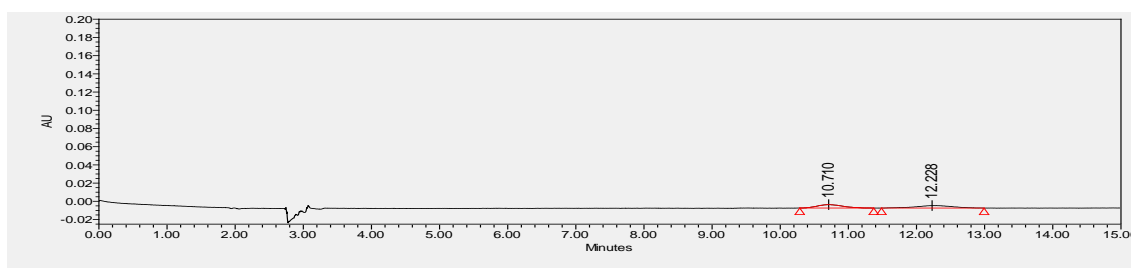

|   | Retention Time | Area   | % Area |
|---|----------------|--------|--------|
| 1 | 10.710         | 95929  | 48.33  |
| 2 | 12.228         | 102568 | 51.67  |

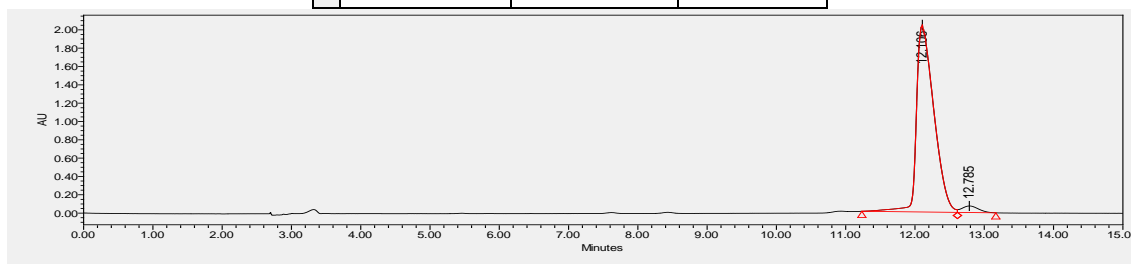

|   | Retention Time | Area     | % Area |
|---|----------------|----------|--------|
| 1 | 12.106         | 35511070 | 96.74  |
| 2 | 12.785         | 1196643  | 3.26   |

***N*-((2*R*,3*S*)-3-allyl-4-oxo-2-phenyl-3,4-dihydro-2*H*-benzo[4,5]thiazolo[3,2-*a*]pyrimidin-3-yl)benzamide (3ah)**

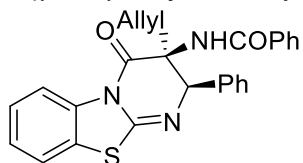

White solid; m.p. 79–83 °C; 40.1 mg, 91% yield, 95% ee, >19:1 d.r.;  $[\alpha]_D^{23} = +585.73$  ( $c = 0.722$  in  $\text{CH}_2\text{Cl}_2$ ).

**UPCC** (chiral OD-3 column),  $\text{CO}_2/\text{MeOH} = 90/10$ , flow rate = 1.5 mL/min,  $\lambda = 221$  nm,  $t_R$  (major) = 5.88 min,  $t_R$  (minor) = 6.88 min.

**IR** (neat): 3405, 1647, 1463, 1368 and 1177  $\text{cm}^{-1}$ .

**$^1\text{H}$  NMR** (400 MHz,  $\text{CDCl}_3$ )  $\delta = 8.23 - 8.19$  (m, 1H), 7.54 – 7.49 (m, 2H), 7.48 – 7.43 (m, 1H), 7.43 – 7.39 (m, 1H), 7.39 – 7.33 (m, 2H), 7.33 – 7.28 (m, 2H), 7.27 – 7.18 (m, 6H), 7.05 (s, 1H), 5.97 (s, 1H), 5.74 – 5.60 (m, 1H), 5.08 (d,  $J = 4.4$  Hz, 1H), 5.04 (d,  $J = 11.6$  Hz, 1H), 3.83 (dd,  $J = 14.4, 7.6$  Hz, 1H), 2.90 (dd,  $J = 14.4, 7.2$  Hz, 1H).

**$^{13}\text{C}$  NMR** (101 MHz,  $\text{CDCl}_3$ )  $\delta = 168.2, 167.4, 153.8, 135.9, 135.0, 135.0, 131.7, 131.1, 128.8, 128.7, 128.5, 127.3, 126.9, 126.8, 126.4, 123.6, 122.3, 120.4, 116.1, 67.3, 63.6, 38.3$ .

**HRMS** (ESI-FT) calcd for  $\text{C}_{26}\text{H}_{22}\text{N}_3\text{O}_2\text{S}^+$  ( $[\text{M}+\text{H}^+]$ ) = 440.1427, Found 440.1426.

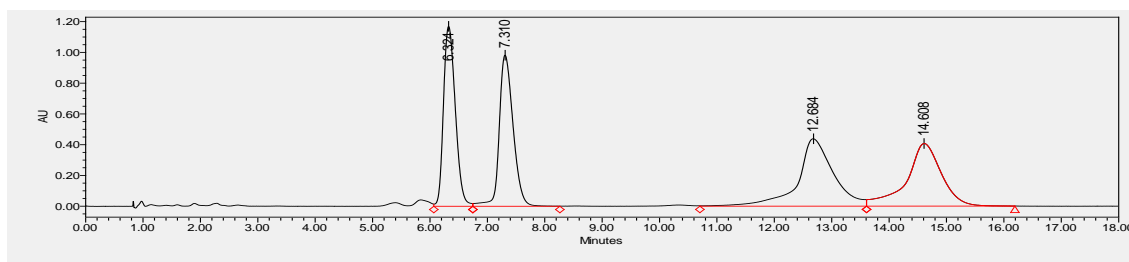

|   | Retention Time | Area     | % Area |
|---|----------------|----------|--------|
| 1 | 6.324          | 16737325 | 24.18  |
| 2 | 7.310          | 16482553 | 23.82  |
| 3 | 12.684         | 18827335 | 27.20  |
| 4 | 14.608         | 17158845 | 24.79  |

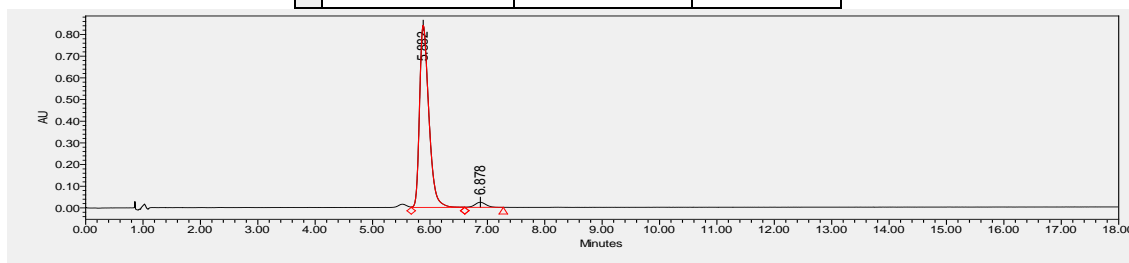

|   | Retention Time | Area    | % Area |
|---|----------------|---------|--------|
| 1 | 5.882          | 9461512 | 96.76  |
| 2 | 6.878          | 317029  | 3.24   |

***N*-((2*R*,3*S*)-3-isobutyl-4-oxo-2-phenyl-3,4-dihydro-2*H*-benzo[4,5]thiazolo[3,2-*a*]pyrimidin-3-yl)benzamide (3ai)**

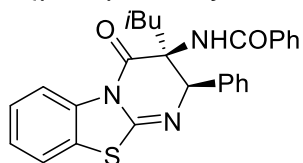

White solid; m.p. 90–93 °C; 42.3 mg, 93% yield, 97% ee, >19:1 d.r.;  $[\alpha]_D^{23} = +571.43$  ( $c = 0.53$  in  $\text{CH}_2\text{Cl}_2$ ).

**UPCC** (chiral OJ-3 column),  $\text{CO}_2/\text{MeOH} = 90/10$ , flow rate = 1.5 mL/min,  $\lambda = 221$  nm,  $t_R$  (major) = 2.21 min,  $t_R$  (minor) = 1.97 min.

**IR** (neat): 3410, 1649, 1463, 1373 and 1177  $\text{cm}^{-1}$ .

**$^1\text{H}$  NMR** (400 MHz,  $\text{CDCl}_3$ )  $\delta = 8.23 - 8.19$  (m, 1H), 7.52 – 7.49 (m, 2H), 7.48 – 7.43 (m, 1H), 7.43 – 7.39 (m, 1H), 7.39 – 7.32 (m, 3H), 7.31 – 7.26 (m, 1H), 7.23 – 7.17 (m, 5H), 7.13 (s, 1H), 5.91 (s, 1H), 3.11 (dd,  $J = 14.9, 5.8$  Hz, 1H), 2.10 (dd,  $J = 14.8, 6.5$  Hz, 1H), 1.76 – 1.62 (m, 1H), 0.94 (d,  $J = 6.8$  Hz, 3H), 0.77 (d,  $J = 6.8$  Hz, 3H).

**$^{13}\text{C}$  NMR** (101 MHz,  $\text{CDCl}_3$ )  $\delta = 169.6, 167.2, 153.7, 135.9, 135.2, 134.9, 131.6, 128.8, 128.7, 128.5, 127.3, 127.0, 126.8, 126.3, 123.7, 122.4, 115.9, 68.3, 63.3, 42.1, 24.7, 24.0, 23.8$ .

**HRMS** (ESI-FT) calcd for  $\text{C}_{27}\text{H}_{26}\text{N}_3\text{O}_2\text{S}^+$  ( $[\text{M}+\text{H}]^+$ ) = 456.1740, Found 456.1739.

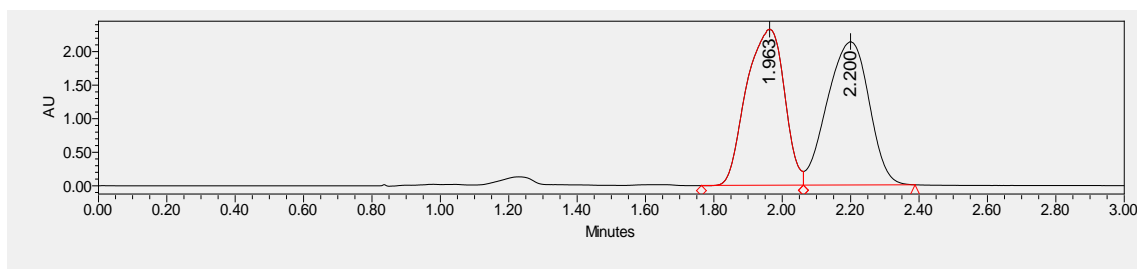

|   | Retention Time | Area     | % Area |
|---|----------------|----------|--------|
| 1 | 1.963          | 17936736 | 49.69  |
| 2 | 2.200          | 18157906 | 50.31  |

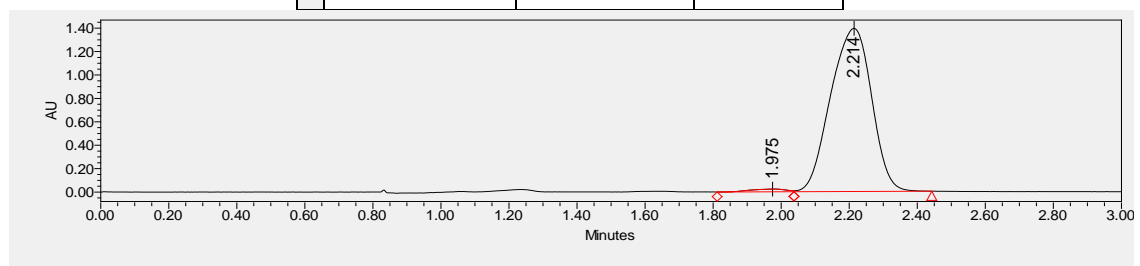

|   | Retention Time | Area     | % Area |
|---|----------------|----------|--------|
| 1 | 1.975          | 171064   | 1.45   |
| 2 | 2.214          | 11651856 | 98.55  |

***N*-((2*R*,3*S*)-4-oxo-3-phenethyl-2-phenyl-3,4-dihydro-2*H*-benzo[4,5]thiazolo[3,2-*a*]pyrimidin-3-yl)benzamide (3aj)**

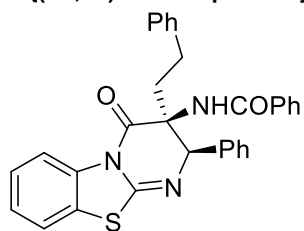

White solid; m.p. 82–86 °C; 45.7 mg, 91% yield, 95% ee, >19:1 d.r.;  $[\alpha]_D^{23} = +496.88$  ( $c = 0.86$  in  $\text{CH}_2\text{Cl}_2$ ).

**UPCC** (chiral OJ-3 column),  $\text{CO}_2/\text{MeOH} = 90/10$ , flow rate = 1.5 mL/min,  $\lambda = 240$  nm,  $t_R$  (major) = 8.13 min,  $t_R$  (minor) = 4.85 min.

**IR** (neat): 3405, 1648, 1462, 1376 and 1184  $\text{cm}^{-1}$ .

**$^1\text{H}$  NMR** (400 MHz,  $\text{CDCl}_3$ )  $\delta = 8.18 - 8.14$  (m, 1H), 7.54 – 7.50 (m, 2H), 7.50 – 7.45 (m, 1H), 7.42 – 7.35 (m, 3H), 7.34 – 7.28 (m, 2H), 7.27 – 7.23 (m, 2H), 7.23 – 7.19 (m, 3H), 7.17 – 7.08 (m, 5H), 7.08 – 7.02 (m, 1H), 5.99 (s, 1H), 3.56 – 3.45 (m, 1H), 2.83 – 2.74 (m, 1H), 2.59 – 2.44 (m, 2H).

**$^{13}\text{C}$  NMR** (101 MHz,  $\text{CDCl}_3$ )  $\delta = 168.7, 167.3, 153.7, 140.1, 135.9, 134.8, 131.7, 128.8, 128.7, 128.5, 128.5, 128.3, 127.2, 126.8, 126.4, 126.2, 123.6, 122.2, 116.2, 67.7, 63.3, 34.7, 30.3$ .

**HRMS** (ESI-FT) calcd for  $\text{C}_{31}\text{H}_{26}\text{N}_3\text{O}_2\text{S}^+$  ( $[\text{M}+\text{H}^+]$ ) = 504.1740, Found 504.1743.

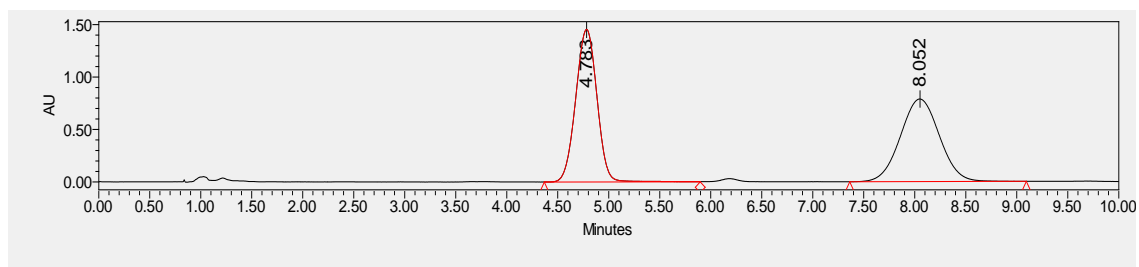

|   | Retention Time | Area     | % Area |
|---|----------------|----------|--------|
| 1 | 4.783          | 21055131 | 50.15  |
| 2 | 8.052          | 20926273 | 49.85  |

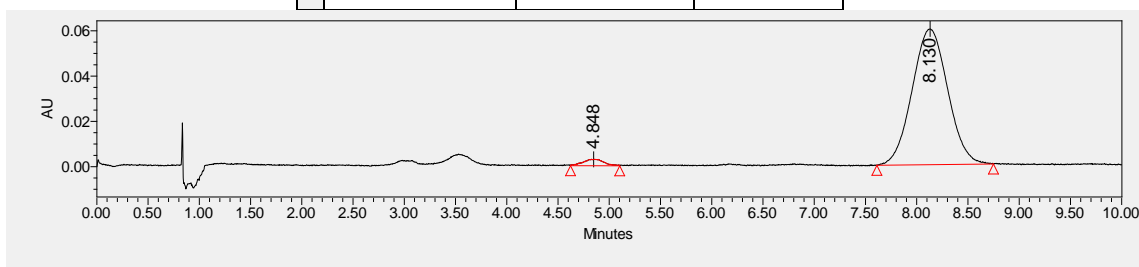

|   | Retention Time | Area    | % Area |
|---|----------------|---------|--------|
| 1 | 4.848          | 40462   | 2.72   |
| 2 | 8.130          | 1445419 | 97.28  |



***N*-((2*R*,3*S*)-3-[(1*H*-indol-3-yl)methyl]-4-oxo-2-phenyl-3,4-dihydro-2*H*-benzo[4,5]thiazolo[3,2-*a*]pyrimidin-3-yl)benzamide (3ak)**

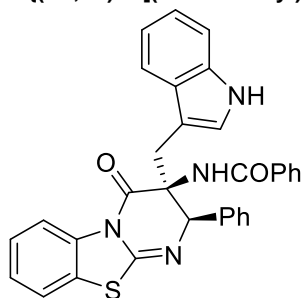

White solid; m.p. 140–145 °C; 56.9 mg, 99% yield, 92% ee, >19:1 d.r.;  $[\alpha]_D^{23} = +317.70$  ( $c = 0.97$  in  $\text{CH}_2\text{Cl}_2$ ).

**UPCC** (chiral OJ-3 column),  $\text{CO}_2/\text{MeOH} = 90/10$ , flow rate = 1.5 mL/min,  $\lambda = 215$  nm,  $t_R$  (major) = 23.49 min,  $t_R$  (minor) = 26.95 min.

**IR** (neat): 3401, 1644, 1461, 1373 and 1188  $\text{cm}^{-1}$ .

**$^1\text{H}$  NMR** (400 MHz,  $\text{CDCl}_3$ )  $\delta = 8.17$  (s, 1H), 7.84 – 7.78 (m, 1H), 7.48 – 7.41 (m, 4H), 7.35 – 7.27 (m, 5H), 7.24 – 7.17 (m, 5H), 7.09 – 7.05 (m, 2H), 7.03 – 6.97 (m, 1H), 6.80 (d,  $J = 2.4$  Hz, 1H), 6.62 (t,  $J = 7.2$  Hz, 1H), 6.21 (s, 1H), 4.53 (d,  $J = 14.8$  Hz, 1H), 3.79 (d,  $J = 14.8$  Hz, 1H).

**$^{13}\text{C}$  NMR** (101 MHz,  $\text{CDCl}_3$ )  $\delta = 168.0, 167.8, 154.2, 136.2, 135.7, 135.2, 135.1, 131.6, 128.8, 128.7, 128.5, 127.5, 127.3, 126.8, 126.8, 126.3, 124.1, 123.3, 122.2, 122.0, 119.5, 118.3, 116.3, 111.2, 109.0, 67.4, 64.7, 29.7$ .

**HRMS** (ESI-FT) calcd for  $\text{C}_{32}\text{H}_{25}\text{N}_4\text{O}_2\text{S}^+$  ( $[\text{M}+\text{H}^+]$ ) = 529.1693, Found 529.1701.

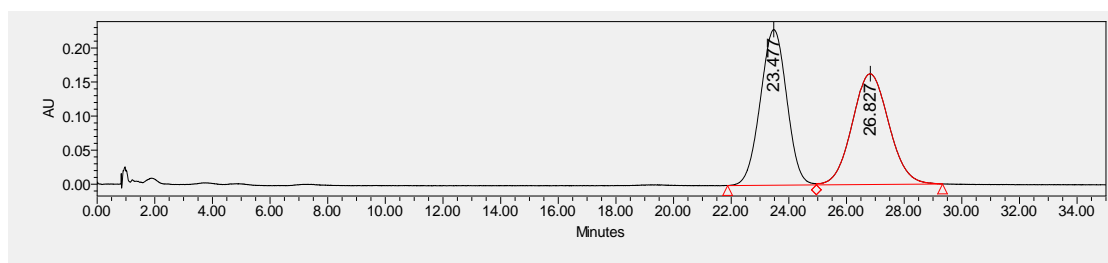

|   | Retention Time | Area     | % Area |
|---|----------------|----------|--------|
| 1 | 23.477         | 14533043 | 50.27  |
| 2 | 26.827         | 14378396 | 49.73  |

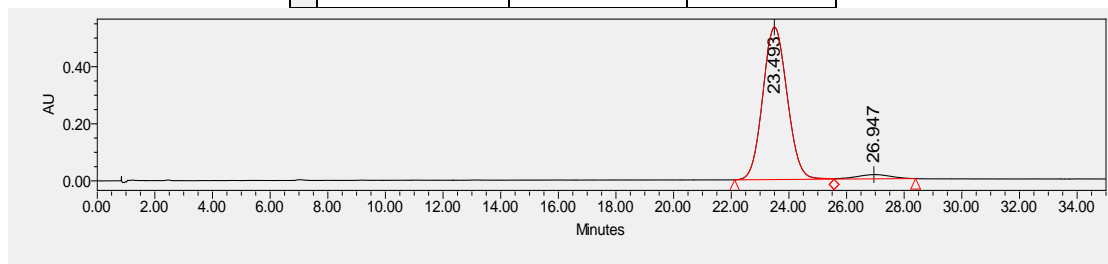

|   | Retention Time | Area     | % Area |
|---|----------------|----------|--------|
| 1 | 23.493         | 31375380 | 96.17  |
| 2 | 26.947         | 1250811  | 3.83   |

***N*-(4-oxo-2,3-diphenyl-3,4-dihydro-2*H*-benzo[4,5]thiazolo[3,2-*a*]pyrimidin-3-yl)benzamide (3a1)**

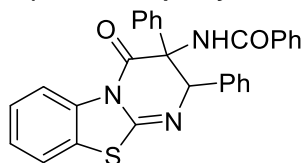

White solid; m.p. 187–188 °C; 10.1 mg, 21% yield, race, >19:1 d.r..

**UPCC** (chiral IC-3 column), CO<sub>2</sub>/MeOH = 80/20, flow rate = 1.5 mL/min, λ = 240 nm, *t<sub>R</sub>* (major) = 9.32 min, *t<sub>R</sub>* (minor) = 15.02 min.

**IR** (neat): 3407, 3062, 1708, 1648, 1459, 1353 and 1180 cm<sup>-1</sup>.

**<sup>1</sup>H NMR** (400 MHz, CDCl<sub>3</sub>) δ = 8.21 – 8.14 (m, 1H), 7.74 – 7.66 (m, 3H), 7.49 – 7.45 (m, 2H), 7.45 – 7.40 (m, 1H), 7.38 – 7.31 (m, 4H), 7.31 – 7.26 (m, 4H), 7.25 – 7.17 (m, 5H), 6.58 (s, 1H).

**<sup>13</sup>C NMR** (101 MHz, CDCl<sub>3</sub>) δ = 166.3, 137.3, 135.7, 131.7, 129.1, 129.0, 128.9, 128.6, 127.6, 126.9, 126.8, 126.3, 122.1, 116.1, 64.2.

**HRMS** (ESI-FT) calcd for C<sub>32</sub>H<sub>25</sub>N<sub>4</sub>O<sub>2</sub>S<sup>+</sup> ([M+Na<sup>+</sup>]) = 498.1247, Found 498.1239.

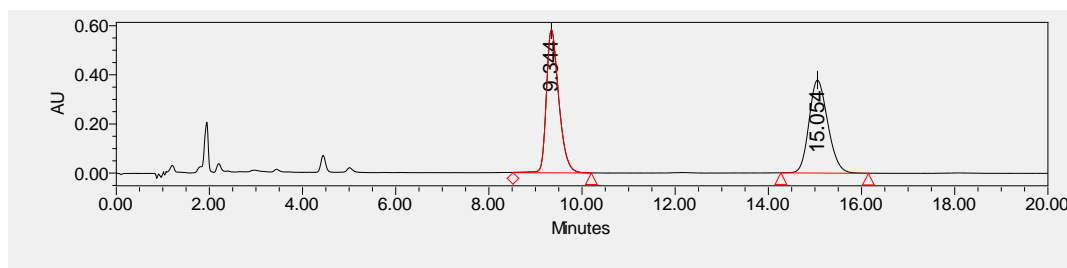

|   | Retention Time | Area     | % Area |
|---|----------------|----------|--------|
| 1 | 9.344          | 10718268 | 50.30  |
| 2 | 15.054         | 10590477 | 49.70  |

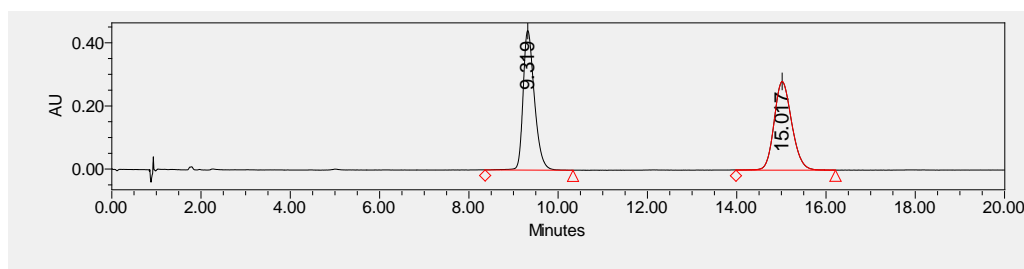

|   | Retention Time | Area    | % Area |
|---|----------------|---------|--------|
| 1 | 9.319          | 7785535 | 50.28  |
| 2 | 15.017         | 7698083 | 49.72  |

***N*-((1*R*)-1-(benzo[*d*]thiazol-2-ylamino)-2-benzyl-3-hydroxy-1-phenylpropan-2-yl)benzamide (4aa)**

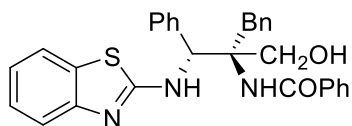

White solid; m.p. 130–135 °C; 49.1 mg, 99% yield, 94% ee, >19:1 d.r.;  $[\alpha]_D^{23} = -67.15$  ( $c = 0.83$  in  $\text{CH}_2\text{Cl}_2$ ).

**UPCC** (chiral OXH column),  $\text{CO}_2/\text{MeOH} = 85/15$ , flow rate = 1.0 mL/min,  $\lambda = 221$  nm,  $t_R$  (major) = 48.88 min,  $t_R$  (minor) = 52.75 min.

**IR** (neat): 3309, 1646, 1546 and 704  $\text{cm}^{-1}$ .

**$^1\text{H}$  NMR** (400 MHz,  $\text{CDCl}_3$ )  $\delta = 8.97$  (s, 1H), 7.60 – 7.56 (m, 2H), 7.55 – 7.52 (m, 1H), 7.49 – 7.44 (m, 3H), 7.40 – 7.34 (m, 3H), 7.34 – 7.27 (m, 5H), 7.25 – 7.17 (m, 4H), 7.09 – 7.04 (m, 1H), 5.78 (s, 1H), 5.54 (s, 1H), 4.06 (d,  $J = 10.8$  Hz, 1H), 3.74 (d,  $J = 13.6$  Hz, 1H), 3.64 (d,  $J = 10.8$  Hz, 1H), 3.39 (d,  $J = 13.6$  Hz, 1H), 1.95 (s, 1H).

**$^{13}\text{C}$  NMR** (101 MHz,  $\text{CDCl}_3$ )  $\delta = 169.2, 169.1, 137.9, 136.1, 135.2, 131.9, 130.9, 128.9, 128.8, 128.8, 128.6, 128.2, 127.2, 126.9, 126.2, 121.9, 121.2, 118.3, 63.6, 63.0, 61.1, 37.3$ .

**HRMS** (ESI-FT) calcd for  $\text{C}_{30}\text{H}_{26}\text{N}_3\text{O}_2\text{S}^+$  ( $[\text{M}+\text{H}^+]$ ) = 494.1897, Found 494.1902.

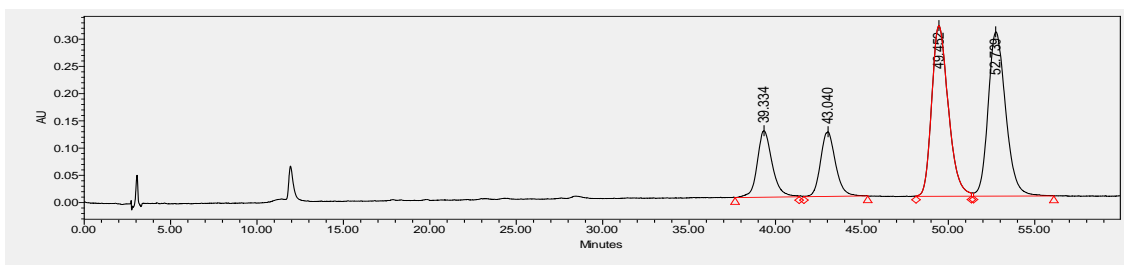

|   | Retention Time | Area     | % Area |
|---|----------------|----------|--------|
| 1 | 39.334         | 7345421  | 12.95  |
| 2 | 43.040         | 7138445  | 12.58  |
| 3 | 49.452         | 20935534 | 36.90  |
| 4 | 52.739         | 21322991 | 37.58  |

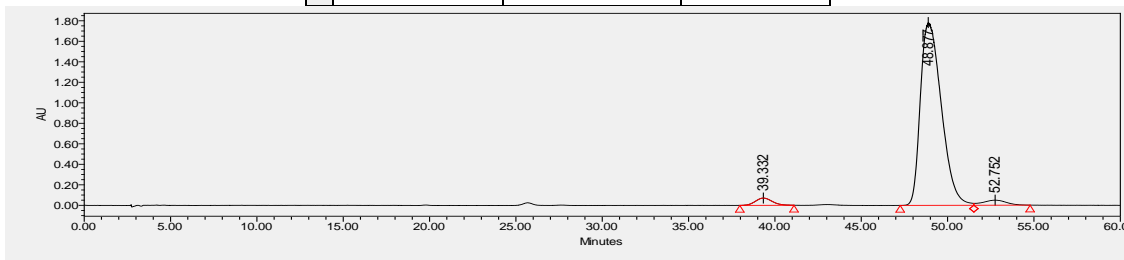

|   | Retention Time | Area      | % Area |
|---|----------------|-----------|--------|
| 1 | 39.332         | 4783850   | 2.99   |
| 2 | 48.877         | 150367116 | 94.09  |
| 3 | 52.752         | 4663090   | 2.92   |

***N*-((2*R*,3*R*)-3-benzyl-2-phenyl-3,4-dihydro-2*H*-benzo[4,5]thiazolo[3,2-*a*]pyrimidin-3-yl)benzamide (5a)**

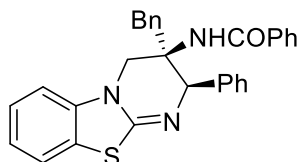

White solid; m.p. 126–129 °C; 161.1 mg, 92% yield, 93% ee, >19:1 d.r.;  $[\alpha]_D^{20} = +320.83$  ( $c = 0.10$  in  $\text{CH}_2\text{Cl}_2$ ).

**UPCC** (chiral OD-3 column),  $\text{CO}_2/\text{EtOH} = 70/30$ , flow rate = 1.5 mL/min,  $\lambda = 267$  nm,  $t_R$  (major) = 2.02 min,  $t_R$  (minor) = 2.52 min.

**IR** (neat): 3028, 1622, 1588, 1476, 1300, 742 and 702  $\text{cm}^{-1}$ .

**$^1\text{H}$  NMR** (400 MHz,  $\text{CDCl}_3$ )  $\delta = 7.45 - 7.35$  (m, 4H), 7.34 – 7.25 (m, 5H), 7.25 – 7.17 (m, 7H), 7.14 (m, 2H), 7.07 (m, 1H), 6.77 (m, 1H), 5.77 (s, 1H), 4.96 (s, 1H), 4.42 (d,  $J = 12.0$  Hz, 1H), 3.63 (d,  $J = 12.0$  Hz, 1H), 3.58 – 3.44 (m, 2H).

**$^{13}\text{C}$  NMR** (101 MHz,  $\text{CDCl}_3$ )  $\delta = 168.1, 157.5, 139.9, 139.8, 136.2, 131.7, 130.9, 128.9, 128.7, 128.4, 128.2, 128.1, 127.0, 126.7, 126.2, 123.2, 122.5, 122.2, 108.1, 63.9, 54.4, 45.0, 38.1$ .

**HRMS** (ESI-FT) calcd for  $\text{C}_{30}\text{H}_{26}\text{N}_3\text{OS}^+$  ( $[\text{M}+\text{H}^+]$ ) = 476.1791, Found 476.1793.

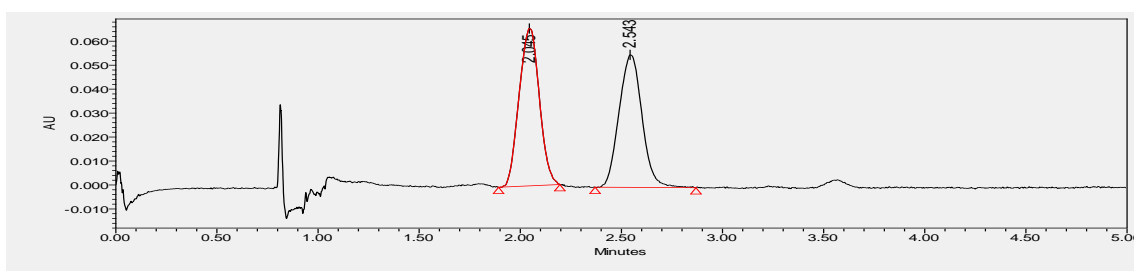

|   | Retention Time | Area   | % Area |
|---|----------------|--------|--------|
| 1 | 2.045          | 456330 | 51.05  |
| 2 | 2.543          | 437620 | 48.95  |

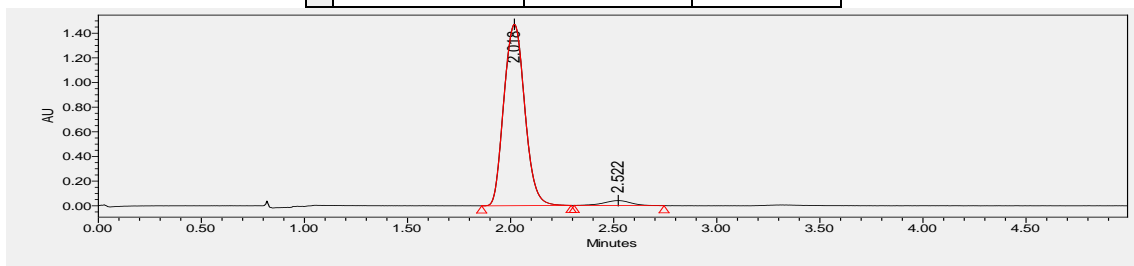

|   | Retention Time | Area     | % Area |
|---|----------------|----------|--------|
| 1 | 2.018          | 10332230 | 96.55  |
| 2 | 2.522          | 369197   | 3.45   |

**Phenyl 4-benzyl-2-(4-methoxyphenyl)-5-oxo-4,5-dihydrooxazole-4-carboxylate (7a)**

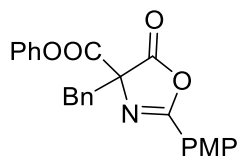

Colorless oil; 6.6 mg, 16% yield, 87% ee;  $[\alpha]_D^{25} = +156.10$  ( $c = 0.33$  in  $\text{CH}_2\text{Cl}_2$ ).

**UPCC** (chiral OD-3 column),  $\text{CO}_2/\text{MeOH} = 90/10$ , flow rate = 1.5 mL/min,  $\lambda = 271$  nm,  $t_R$  (major) = 4.41 min,  $t_R$  (minor) = 4.98 min.

**IR** (neat): 2934, 1740, 1606, 1492, 1260, 1191, 1026, 844 and 701  $\text{cm}^{-1}$ .

**$^1\text{H NMR}$**  (400 MHz,  $\text{CDCl}_3$ )  $\delta = 7.90 - 7.85$  (m, 2H), 7.41 - 7.34 (m, 2H), 7.27 (m, 1H), 7.26 - 7.23 (m, 2H), 7.23 - 7.16 (m, 3H), 7.14 - 7.08 (m, 2H), 6.97 - 6.91 (m, 2H), 3.86 (s, 3H), 3.72 (d,  $J = 13.6$  Hz, 1H), 3.60 (d,  $J = 13.6$  Hz, 1H).

**$^{13}\text{C NMR}$**  (101 MHz,  $\text{CDCl}_3$ )  $\delta = 163.8, 150.4, 132.9, 130.6, 130.4, 129.7, 128.4, 127.8, 126.7, 121.27$  3, 117.3, 114.4, 77.6, 55.7, 40.4.

**HRMS** (ESI-FT) calcd for  $\text{C}_{24}\text{H}_{20}\text{NO}_5^+$  ( $[\text{M}+\text{H}^+]$ ) = 402.1336, Found 402.1332.

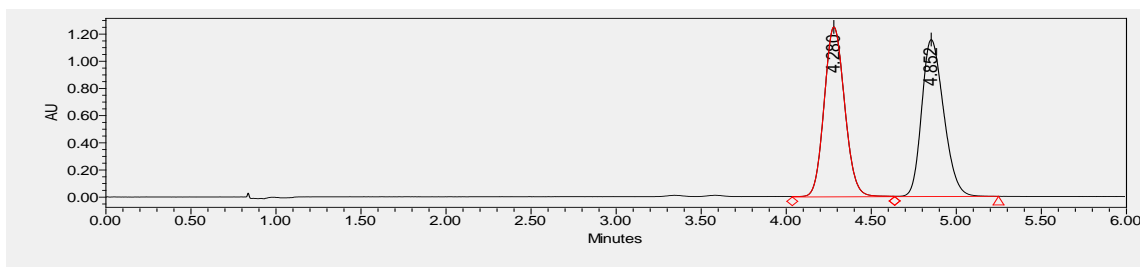

|   | Retention Time | Area     | % Area |
|---|----------------|----------|--------|
| 1 | 4.280          | 10474461 | 50.24  |
| 2 | 4.852          | 10376184 | 49.76  |

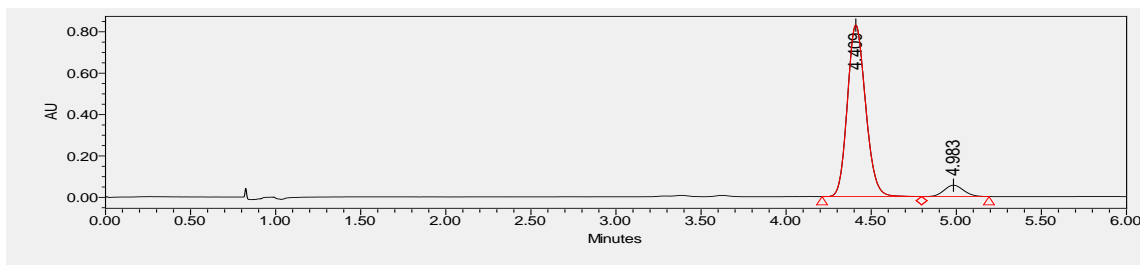

|   | Retention Time | Area    | % Area |
|---|----------------|---------|--------|
| 1 | 4.409          | 6147335 | 93.32  |
| 2 | 4.983          | 439962  | 6.68   |

## 9. Copies of NMR spectra for products

Figure S1. <sup>1</sup>H NMR of 3aa

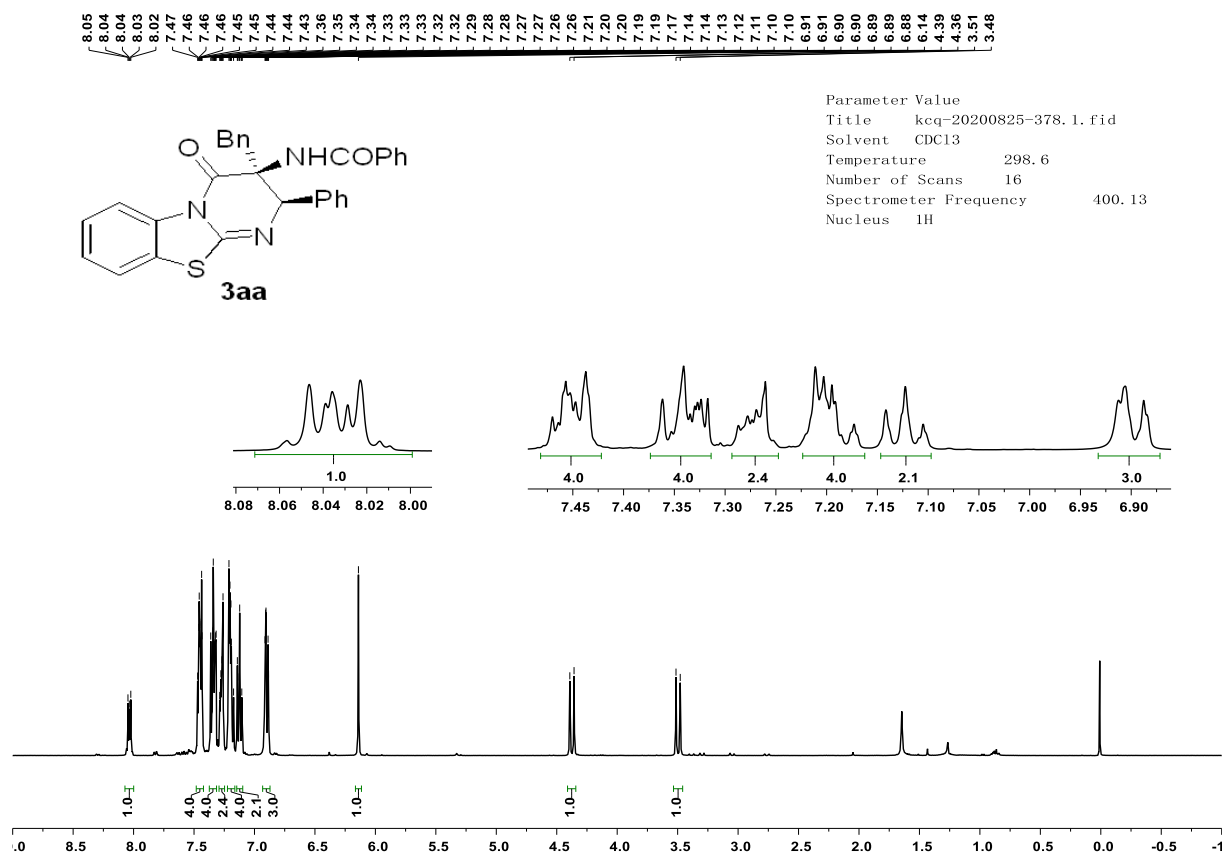

Figure S2. <sup>13</sup>C NMR of 3aa

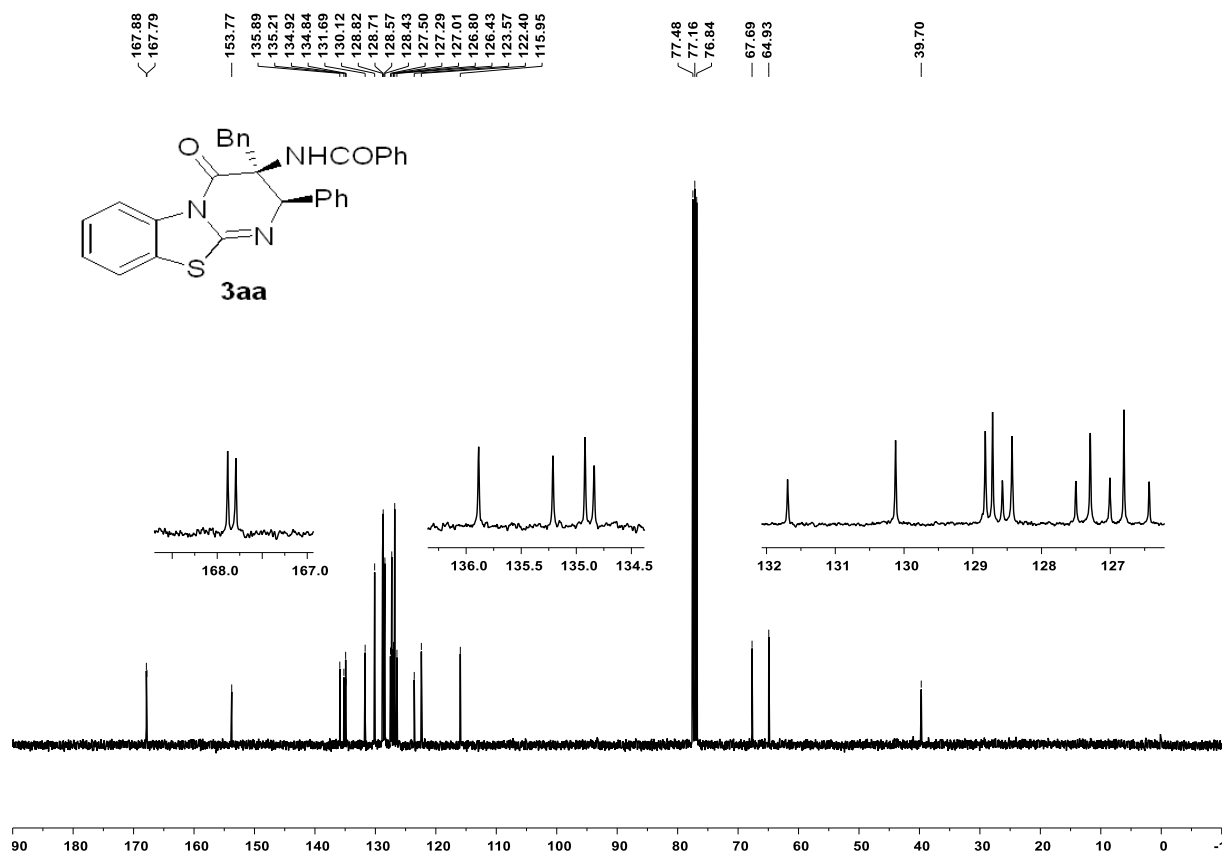

Figure S3. <sup>1</sup>H NMR of 3ba

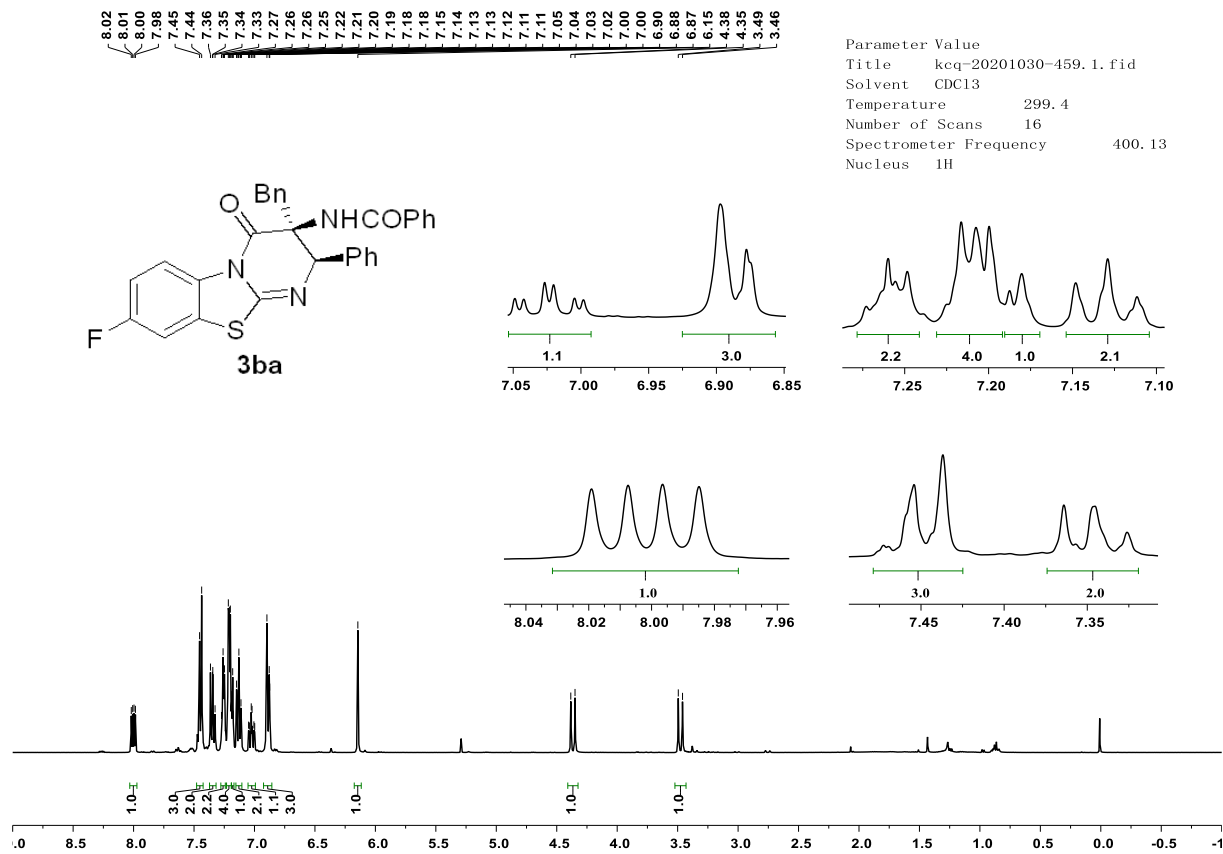

Figure S4. <sup>13</sup>C NMR of 3ba

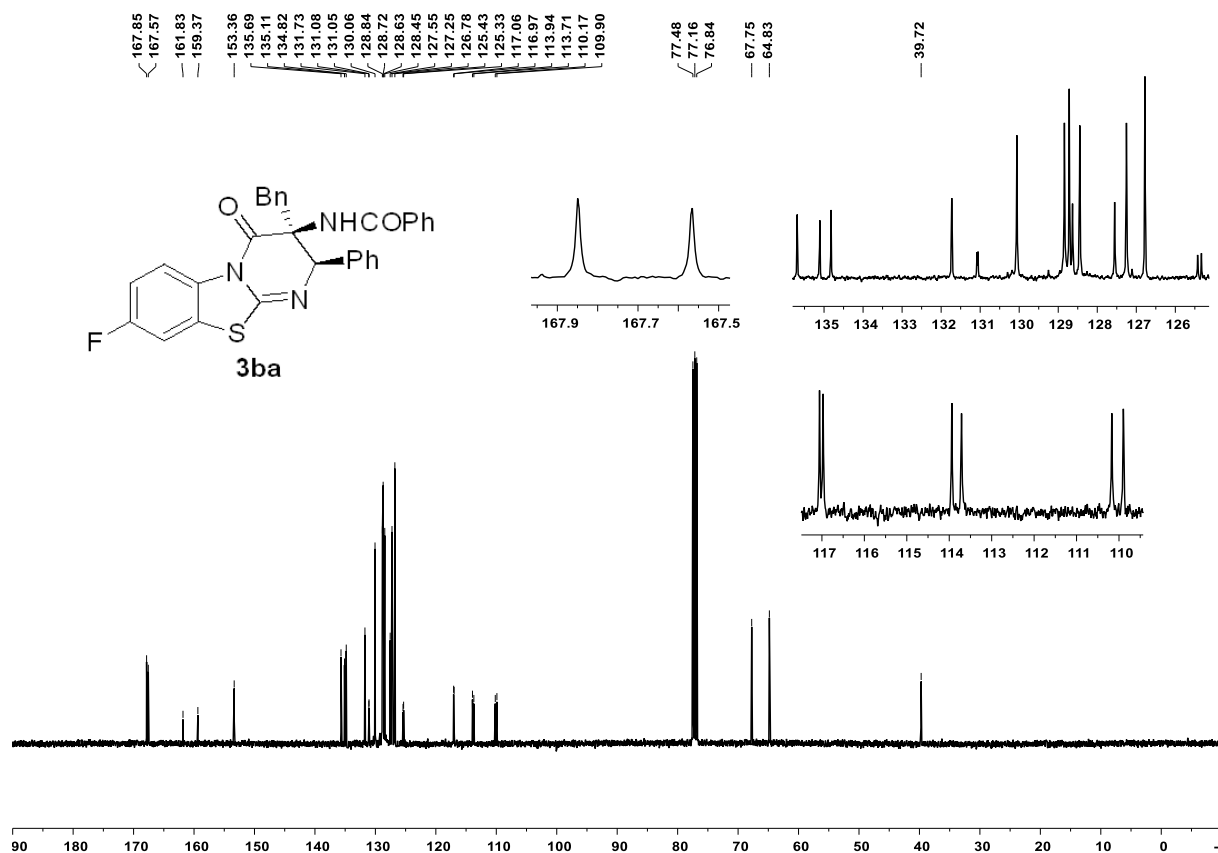

Figure S5.  $^{19}\text{F}\{^1\text{H}\}$  NMR of 3ba

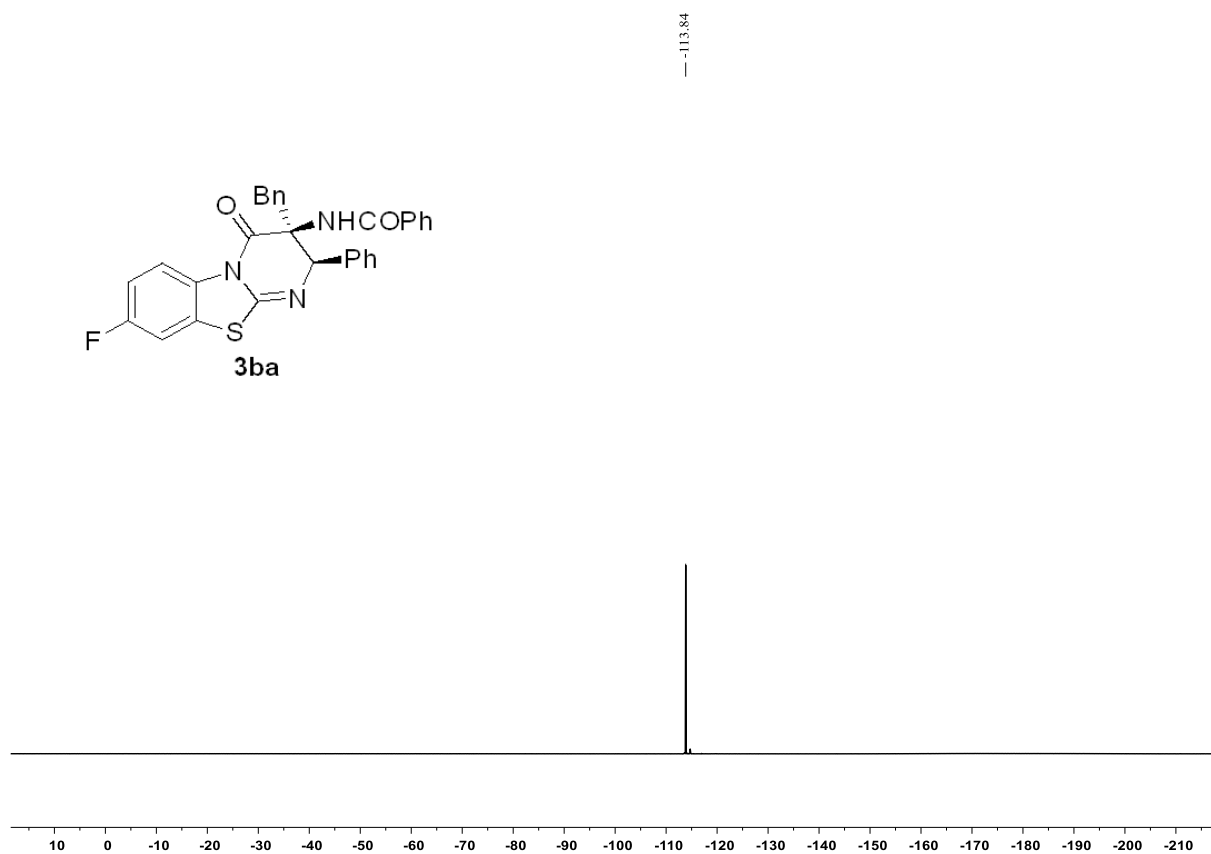

Figure S6.  $^1\text{H}$  NMR of 3ca

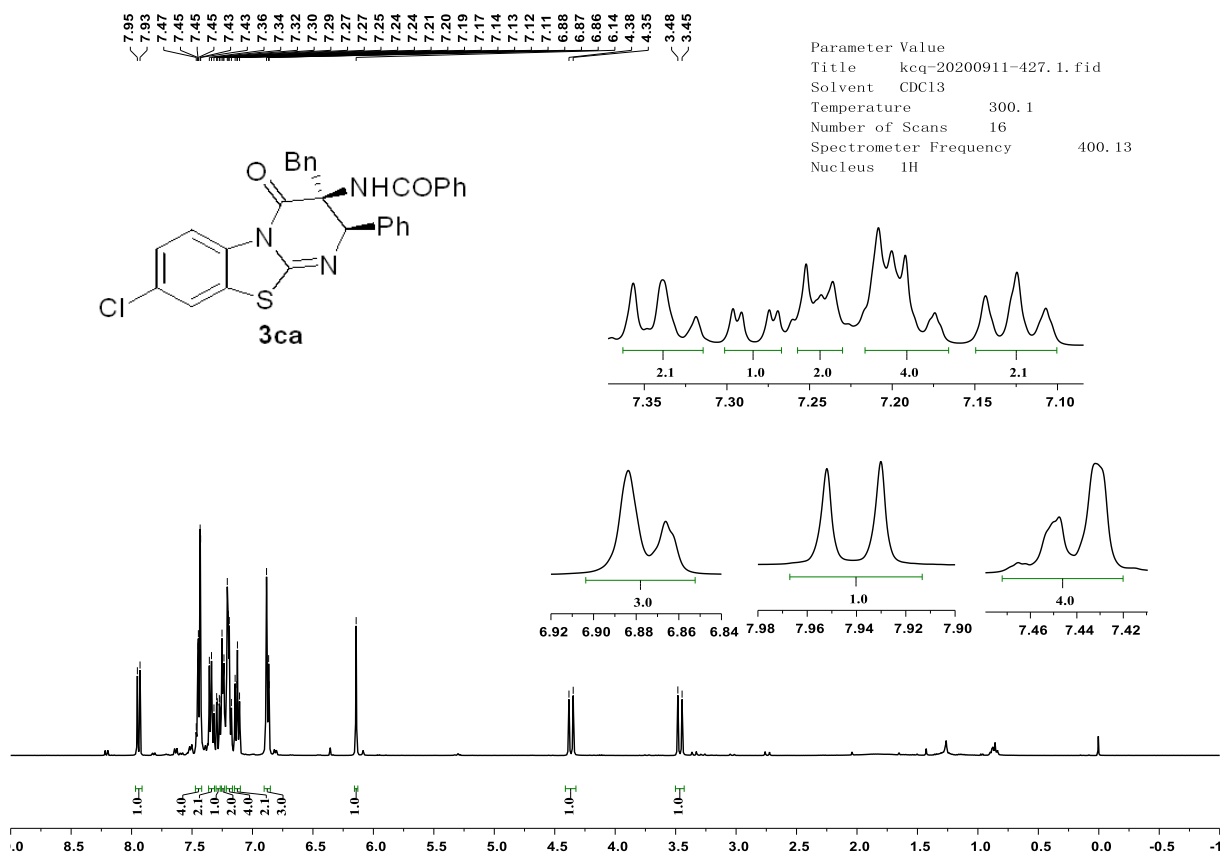



Figure S7. <sup>13</sup>C NMR of 3ca

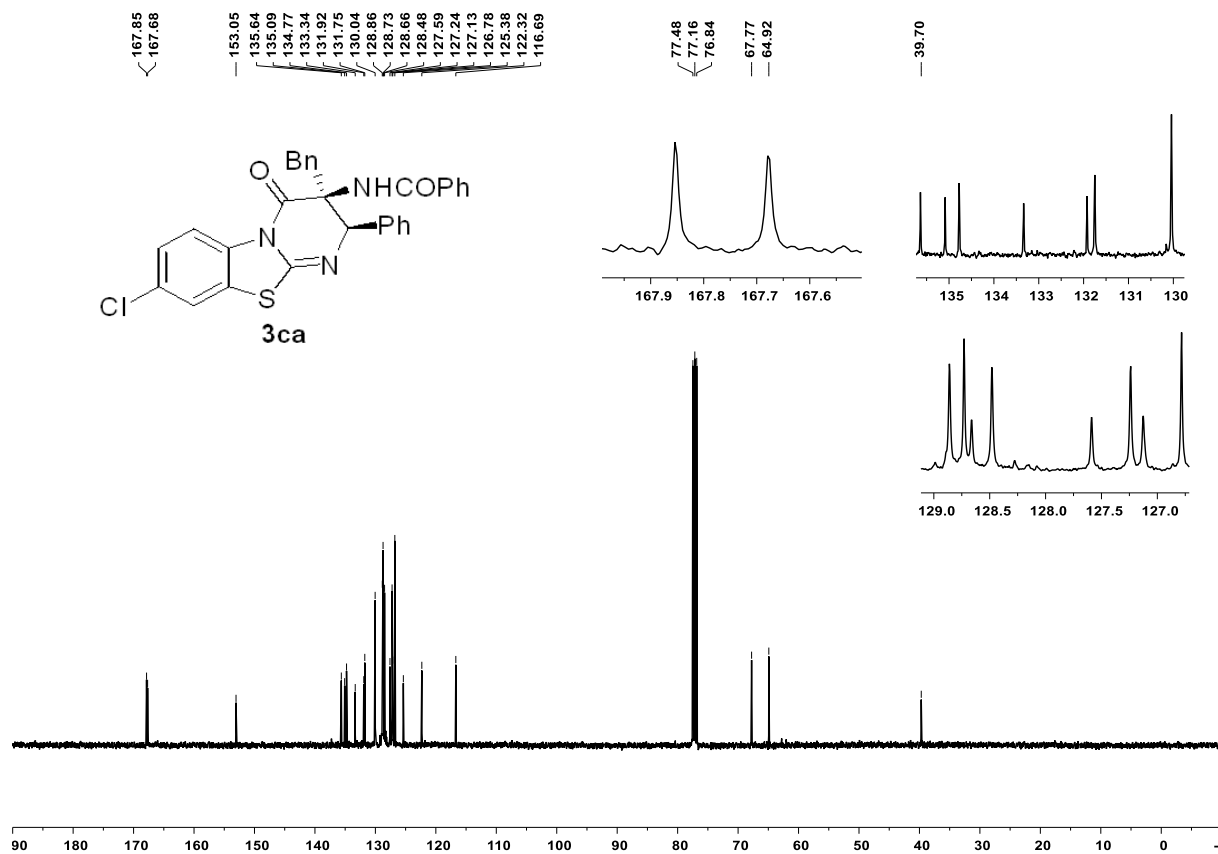

Figure S8. <sup>1</sup>H NMR of 3da

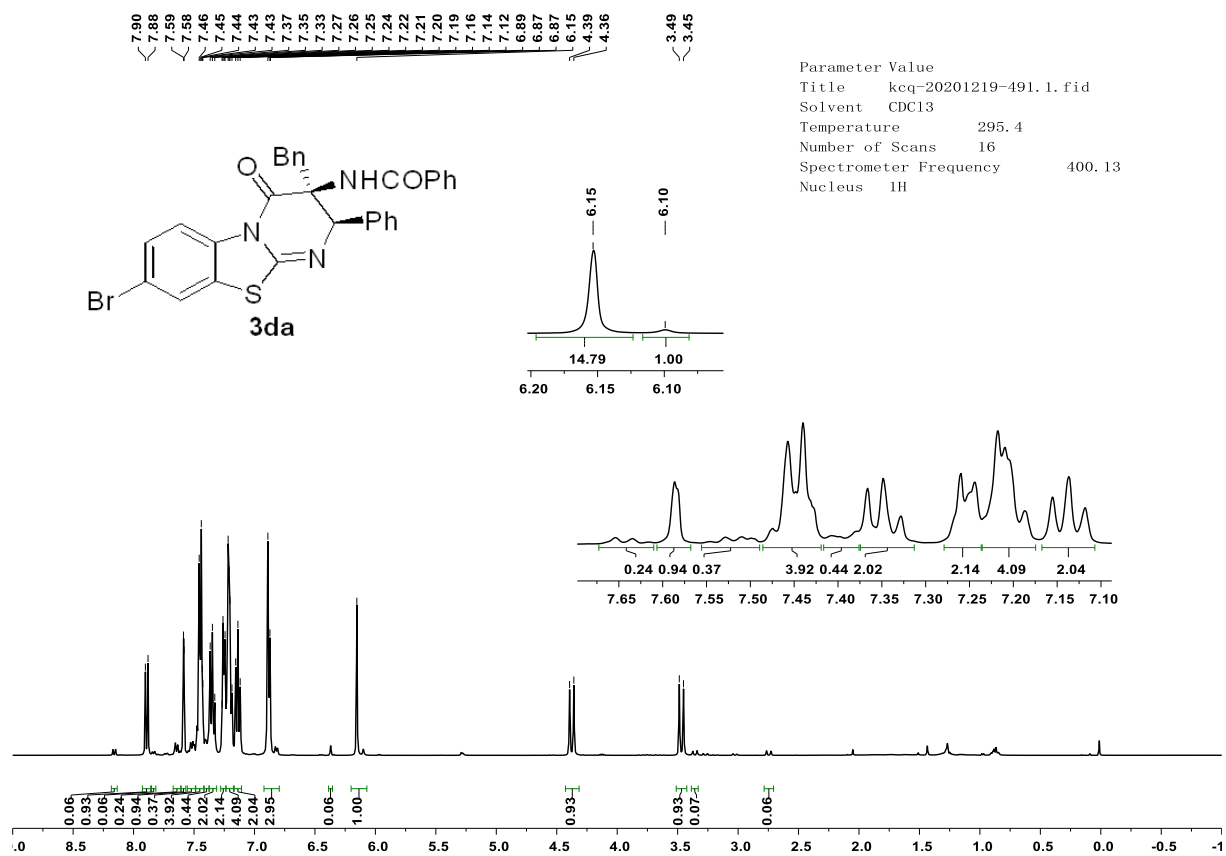

Figure S9.  $^{13}\text{C}$  NMR of 3da

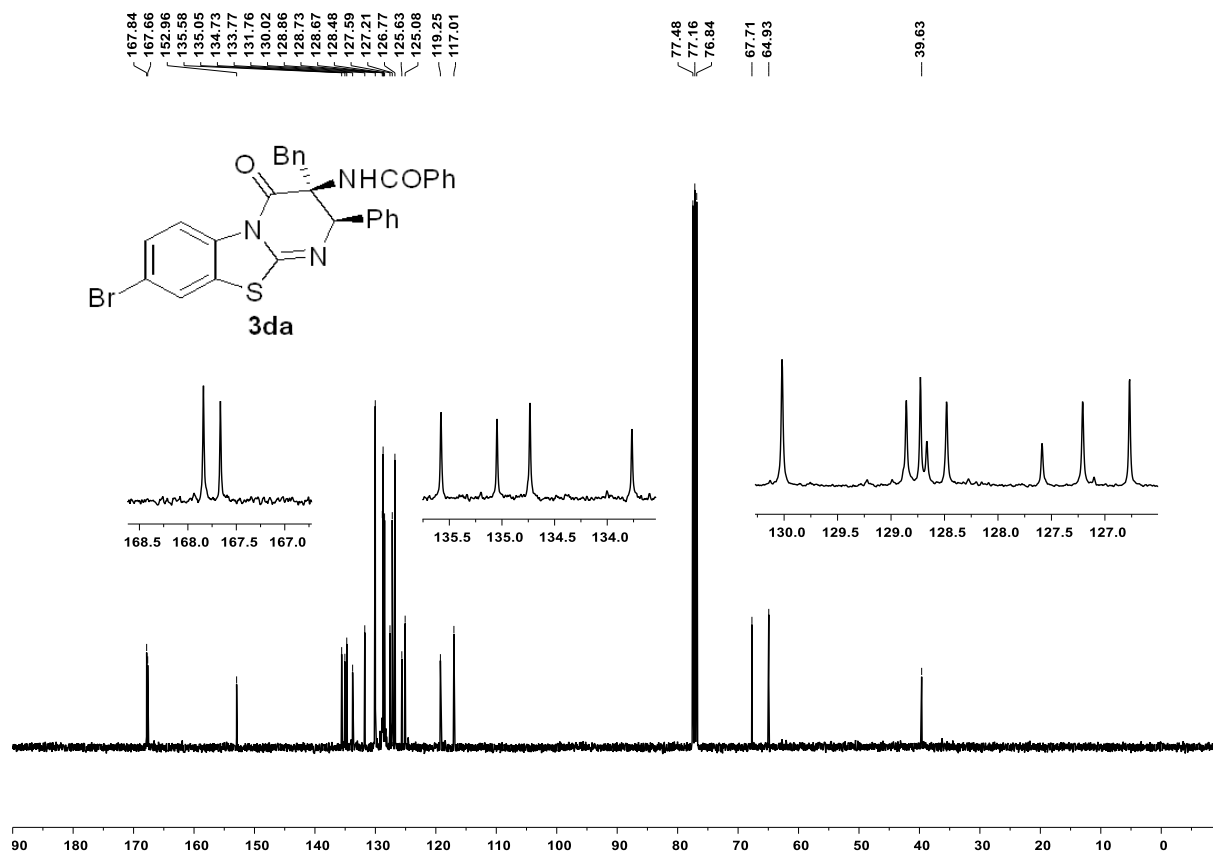

Figure S10.  $^1\text{H}$  NMR of 3ea

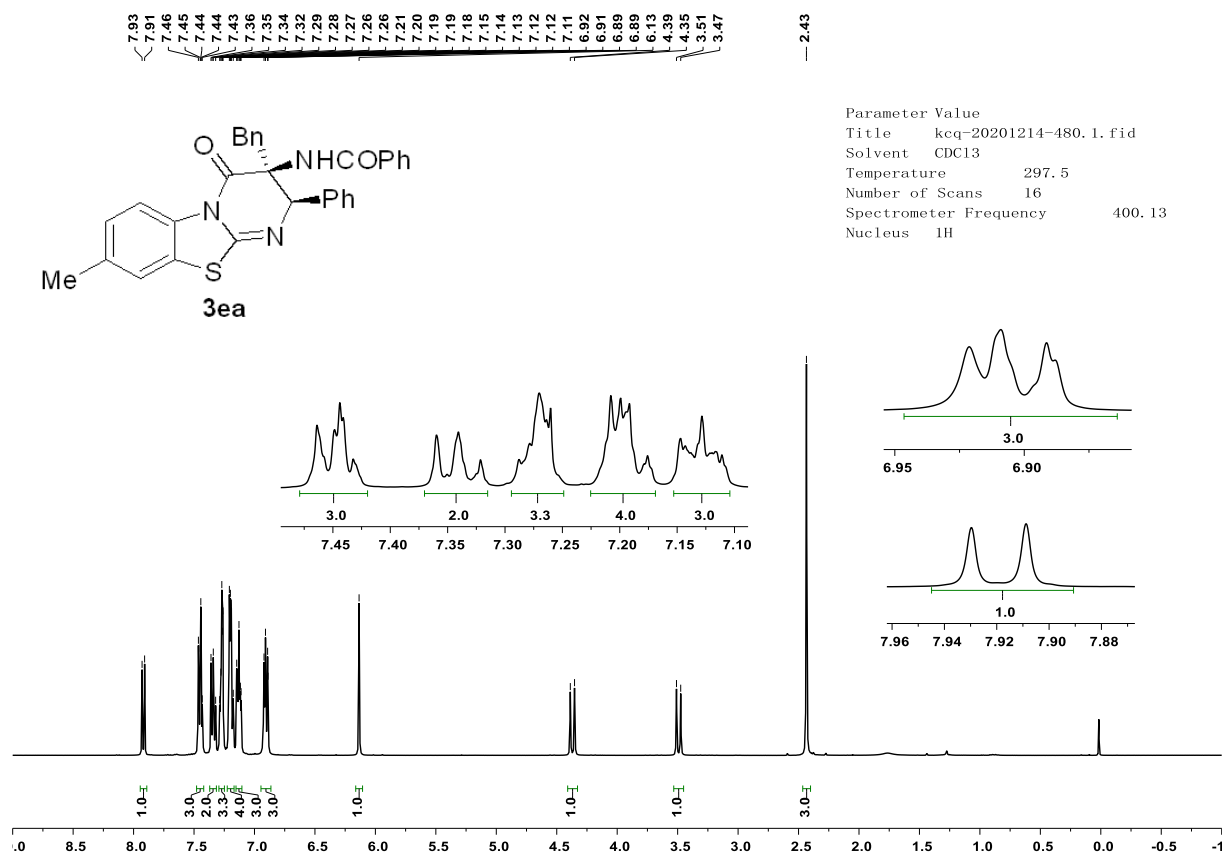

Figure S11. <sup>13</sup>C NMR of 3ea

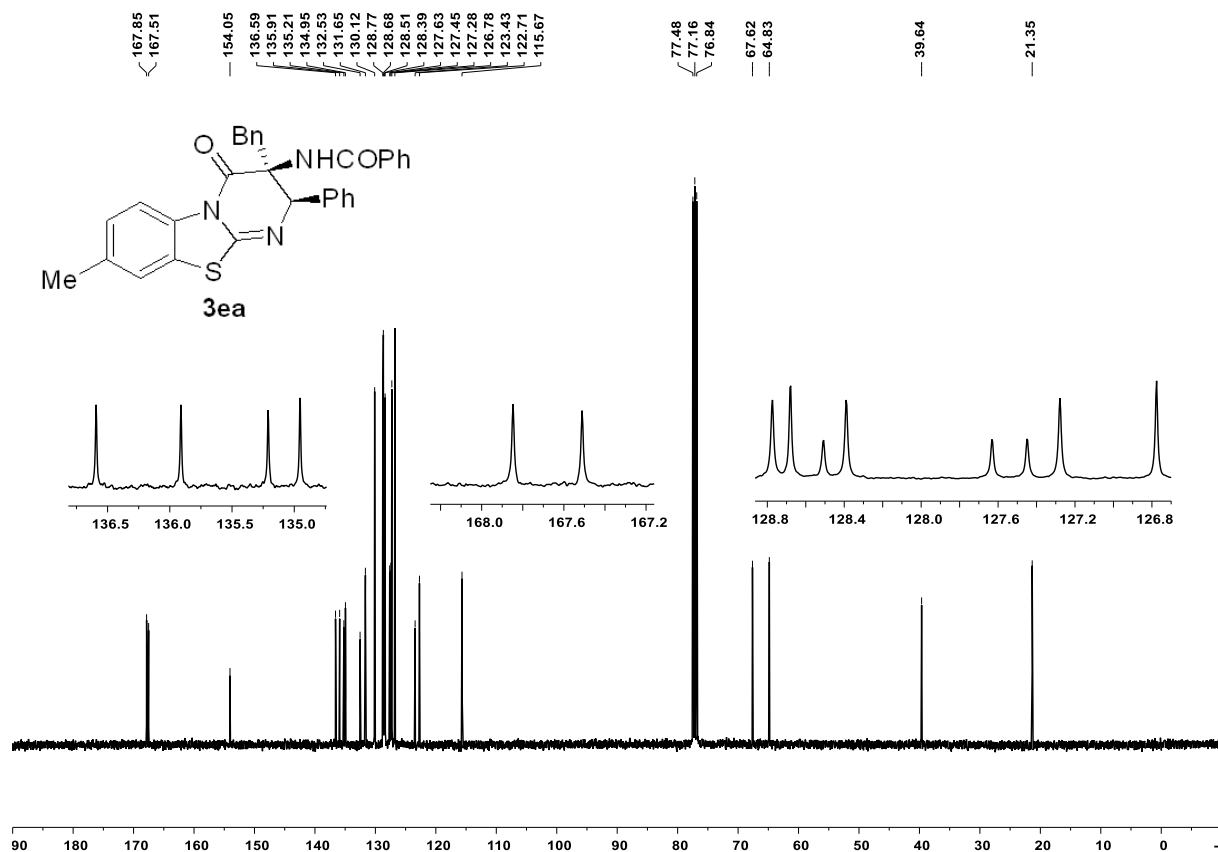

Figure S12. <sup>1</sup>H NMR of 3fa

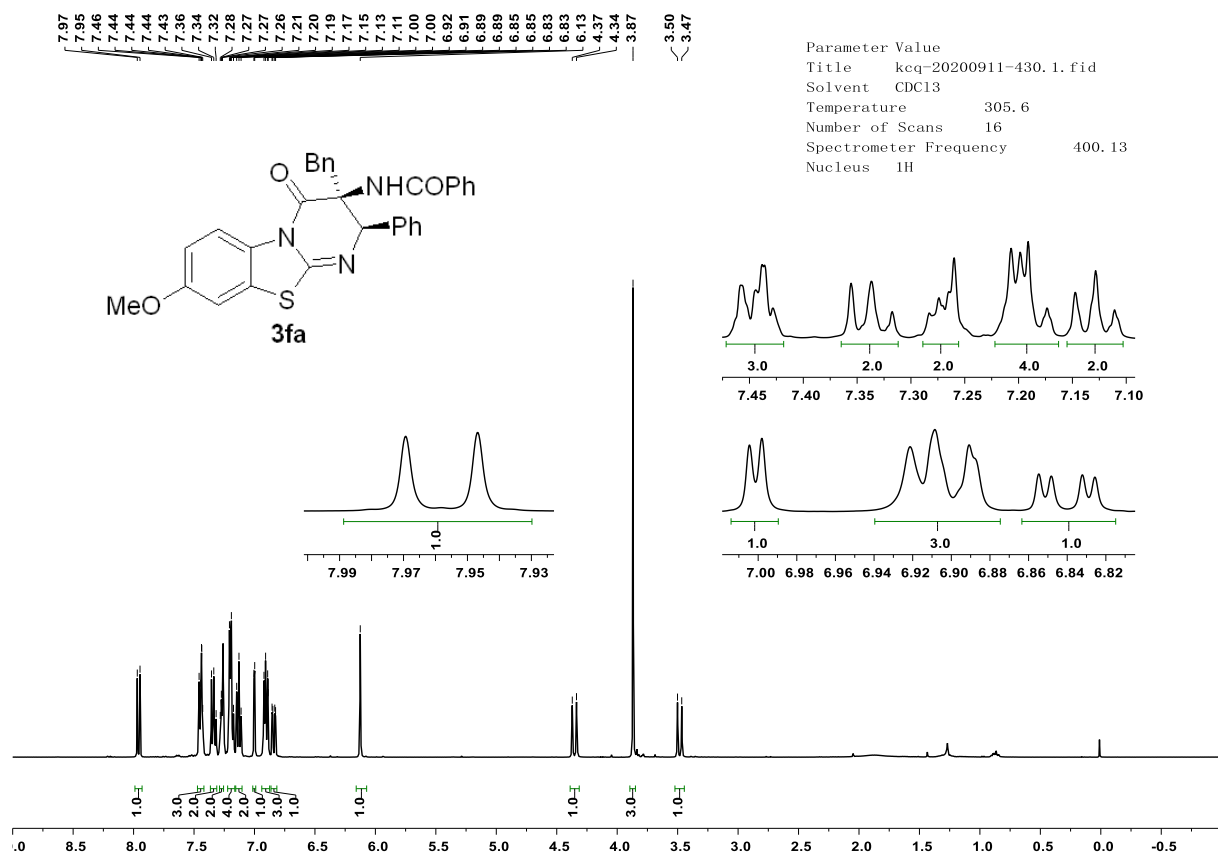

Figure S13. <sup>13</sup>C NMR of 3fa

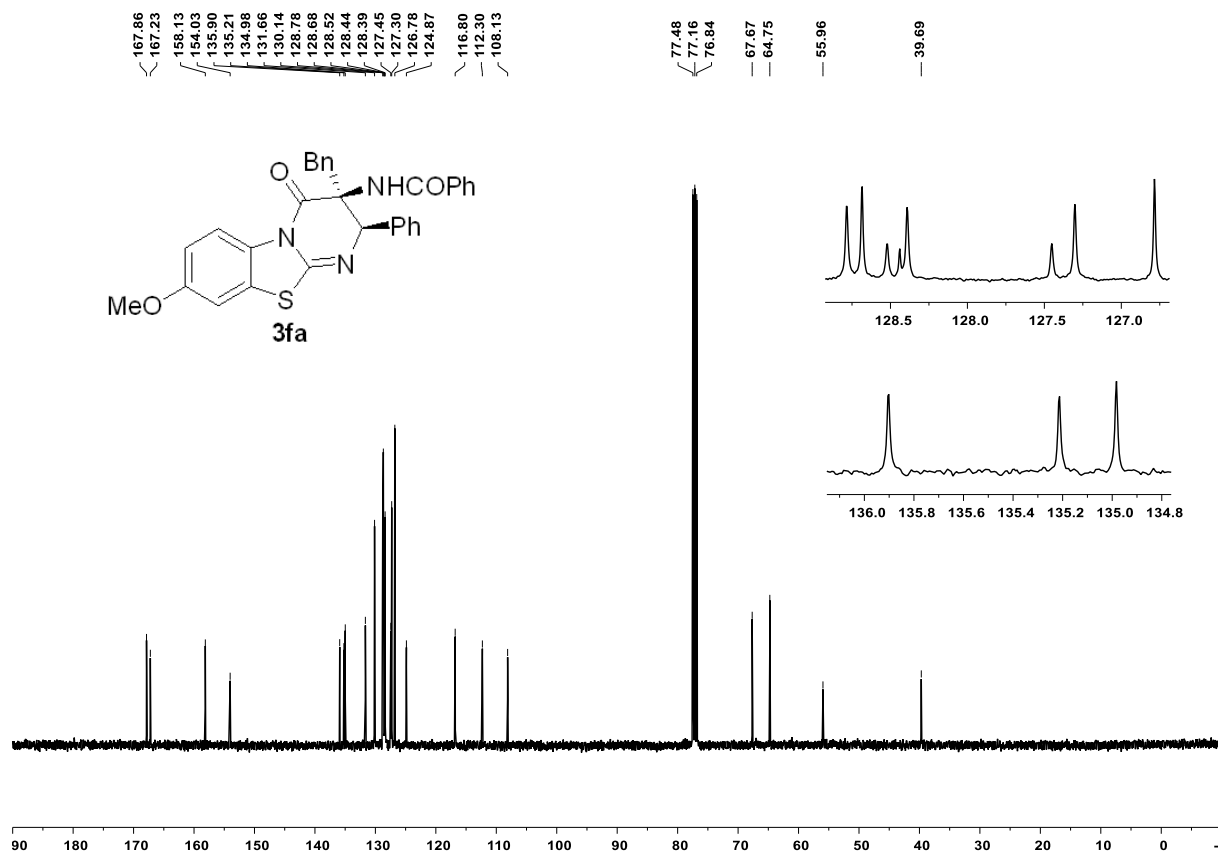

Figure S14. <sup>1</sup>H NMR of 3ga

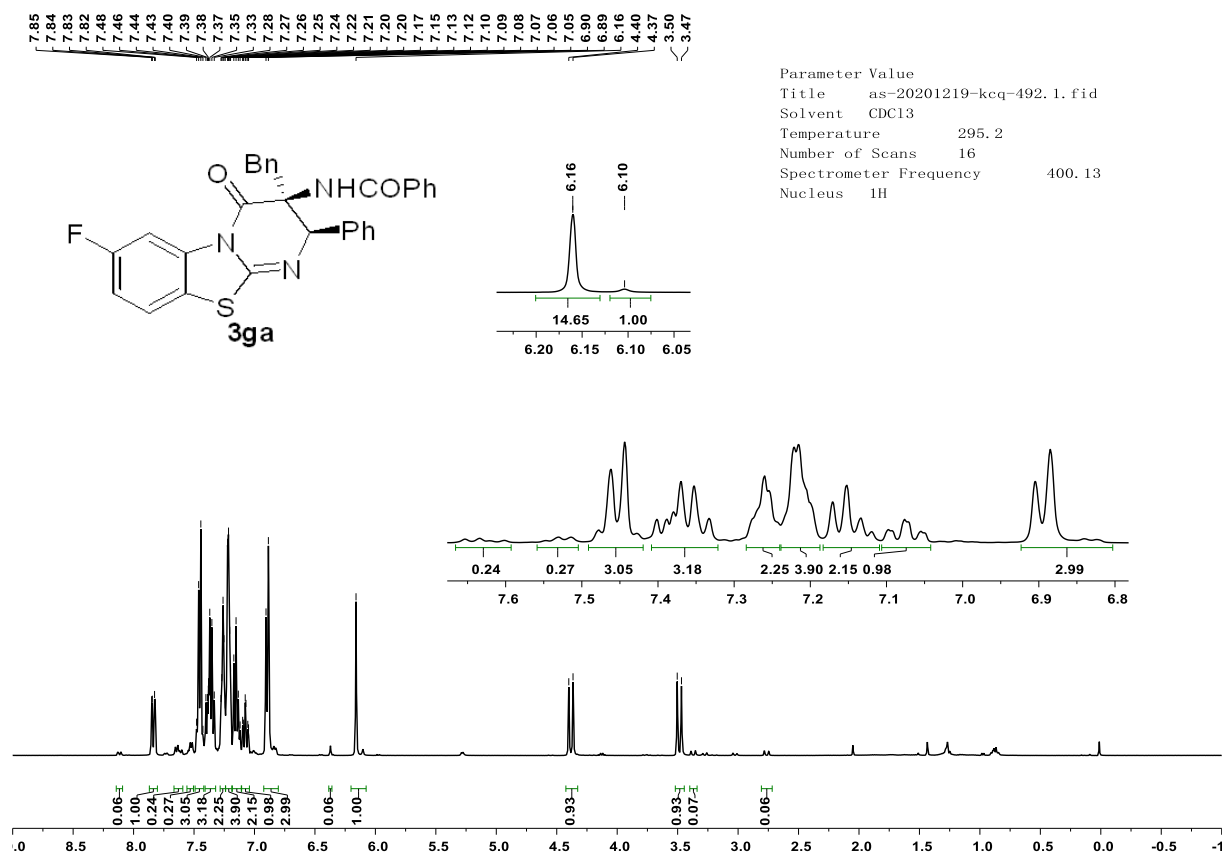

Figure S15.  $^{13}\text{C}$  NMR of 3ga

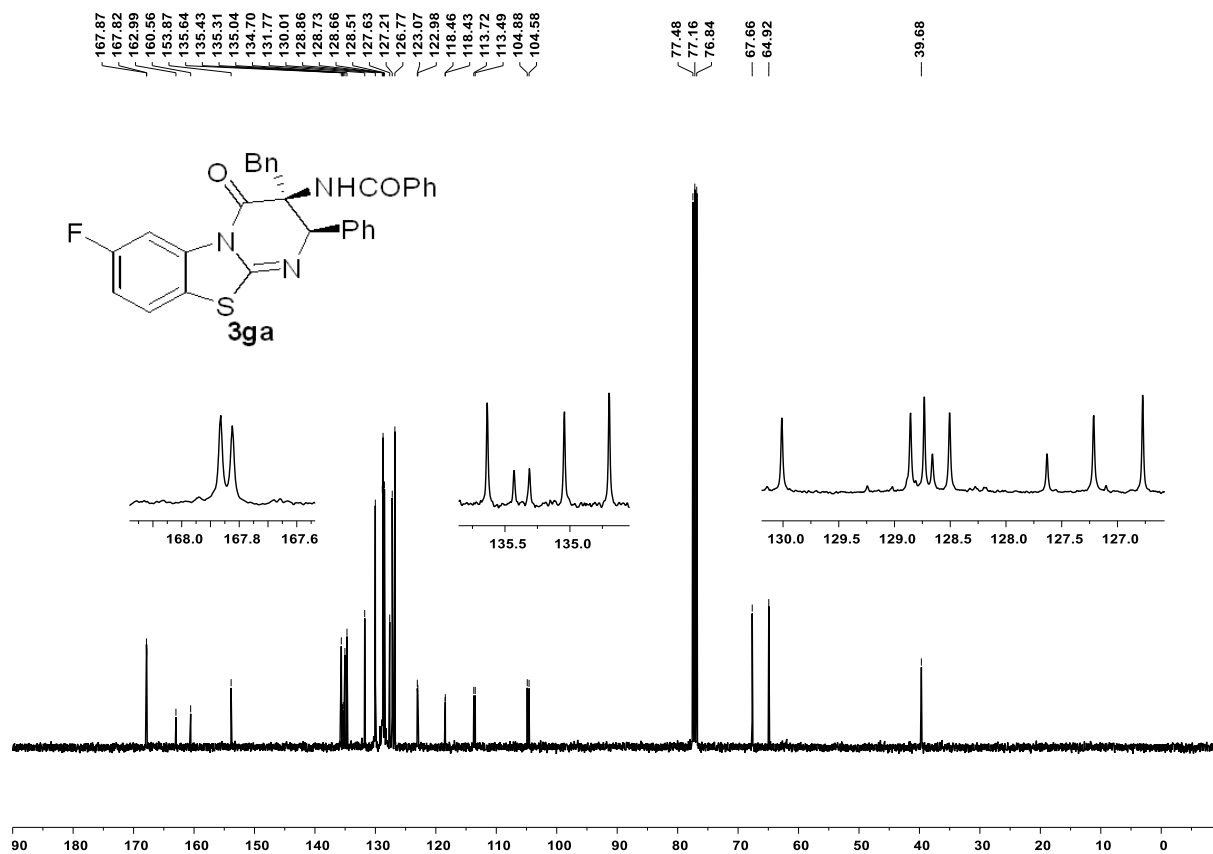

Figure S16.  $^{19}\text{F}\{^1\text{H}\}$  NMR of 3ga

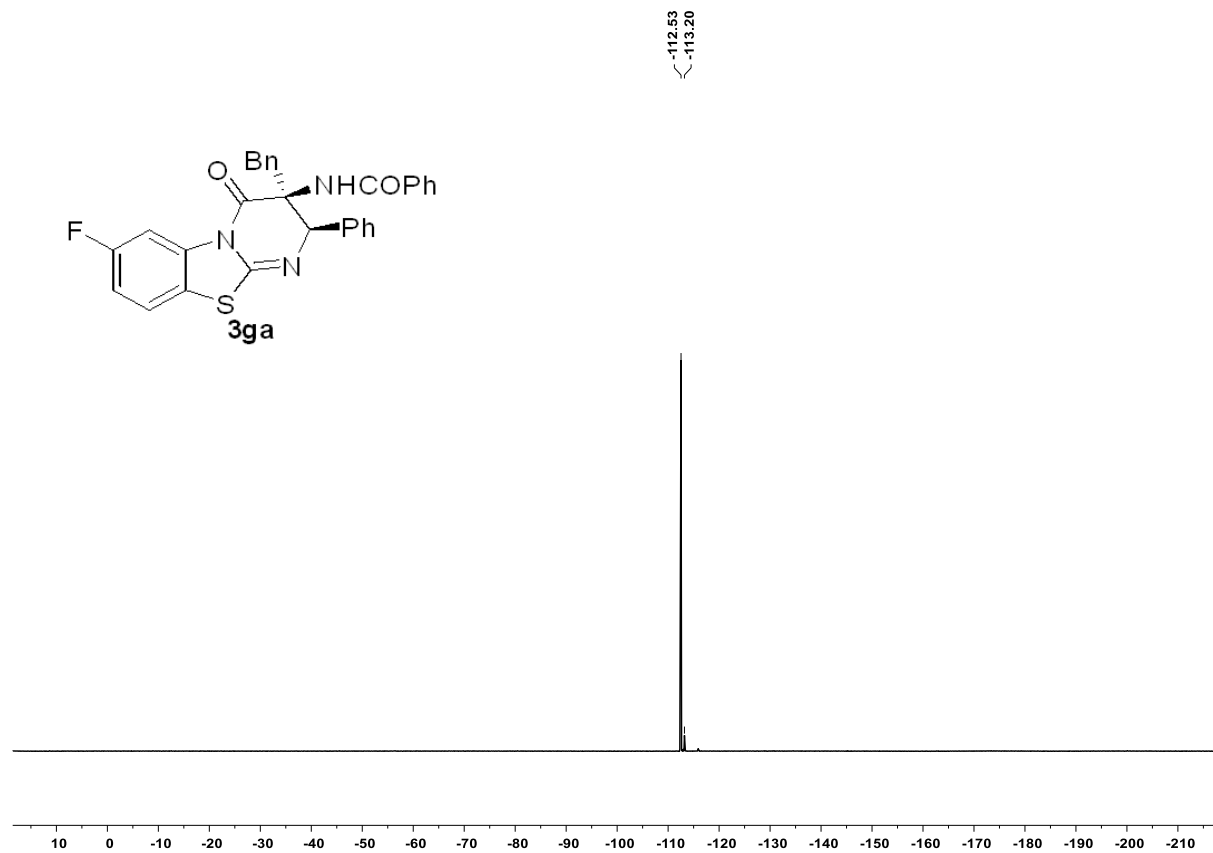

Figure S17. <sup>1</sup>H NMR of 3ha

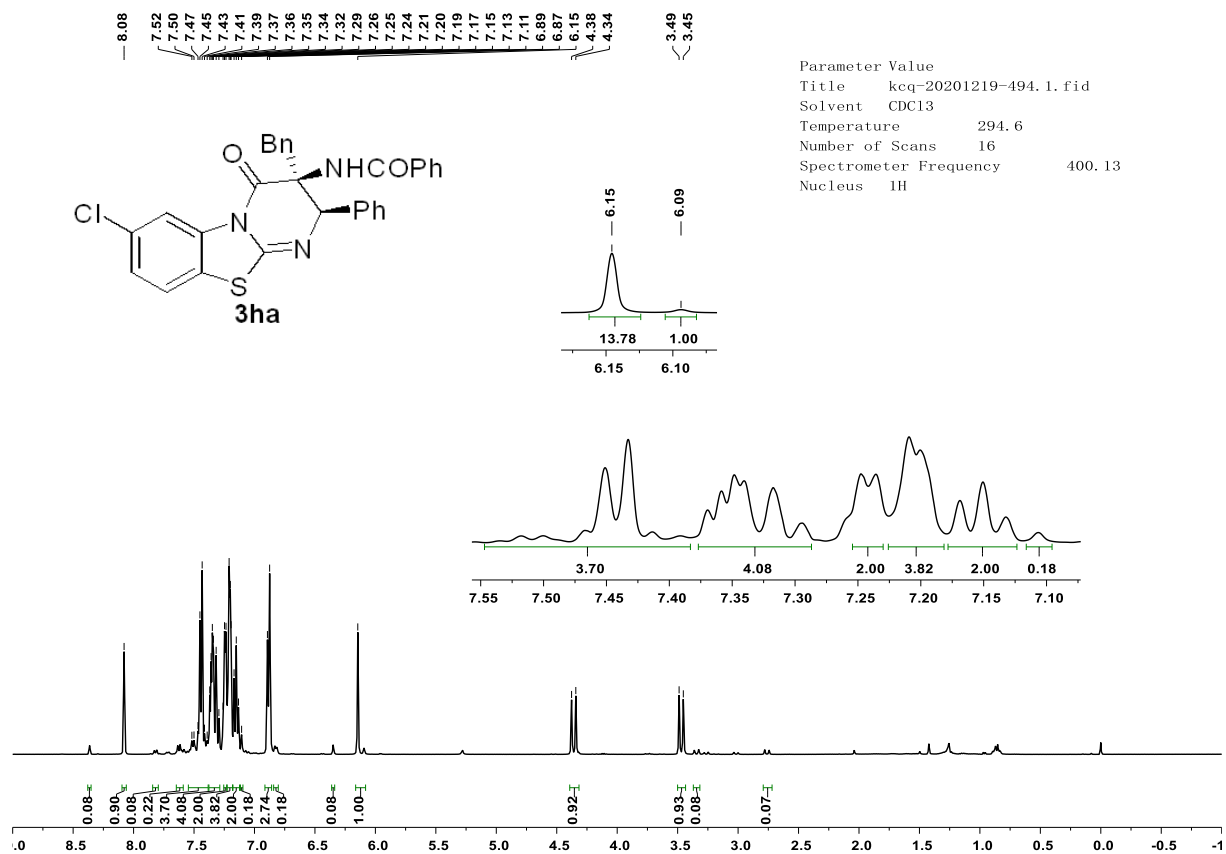

Figure S18. <sup>13</sup>C NMR of 3ha

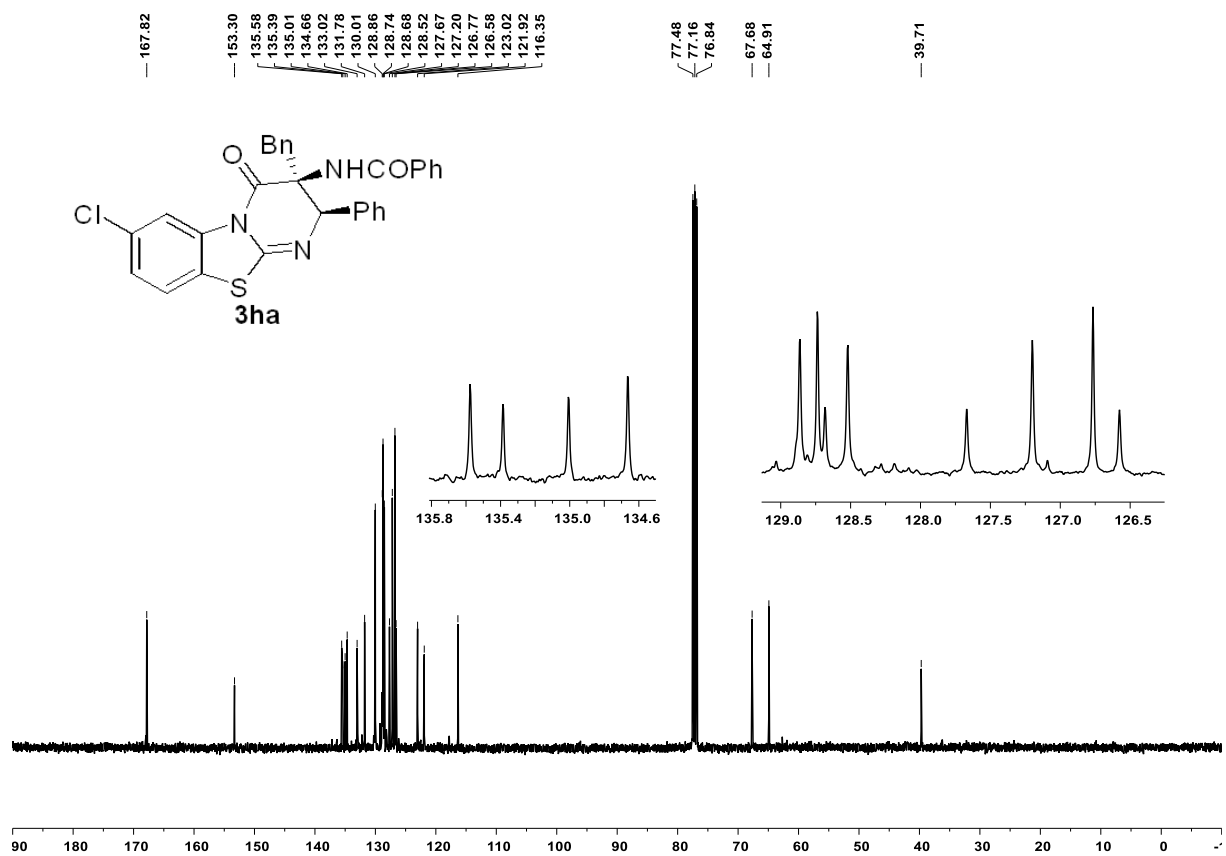

Figure S19. <sup>1</sup>H NMR of 3ia

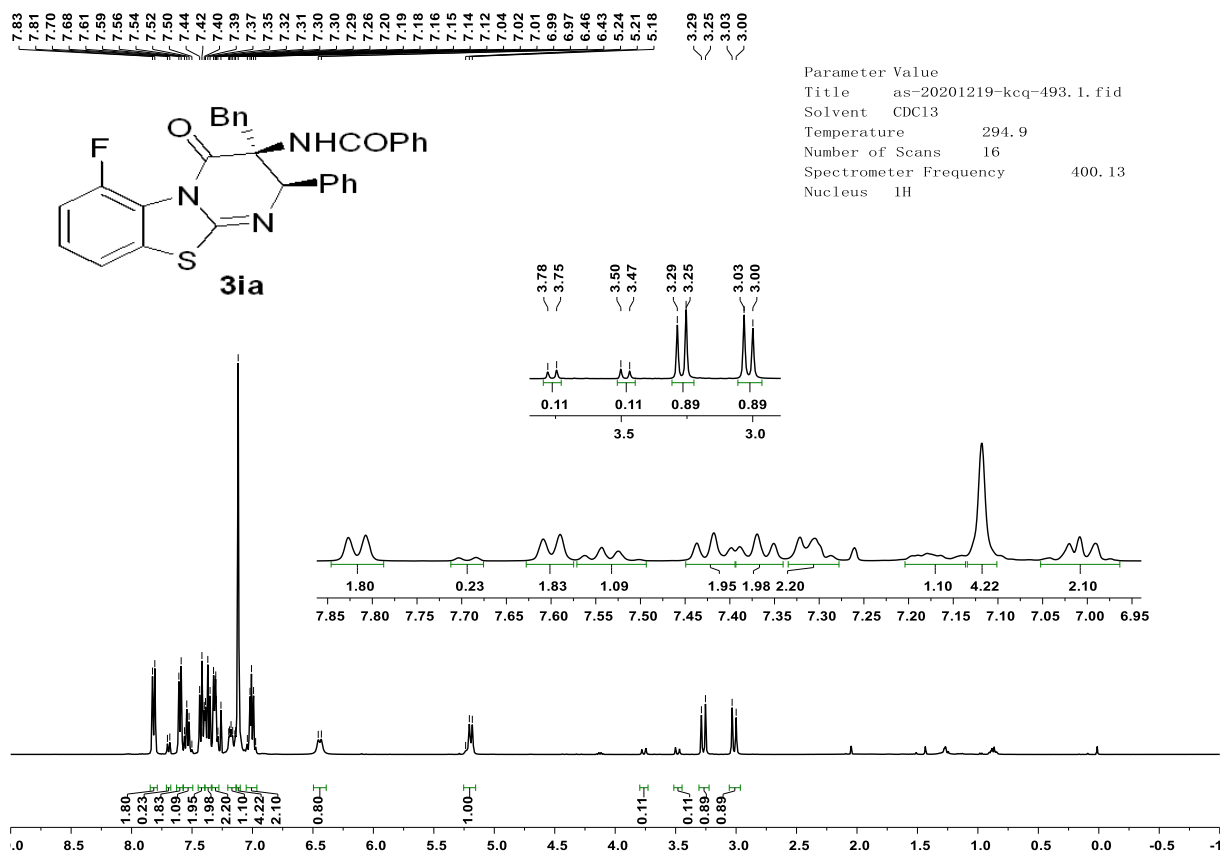

Figure S20. <sup>13</sup>C NMR of 3ia

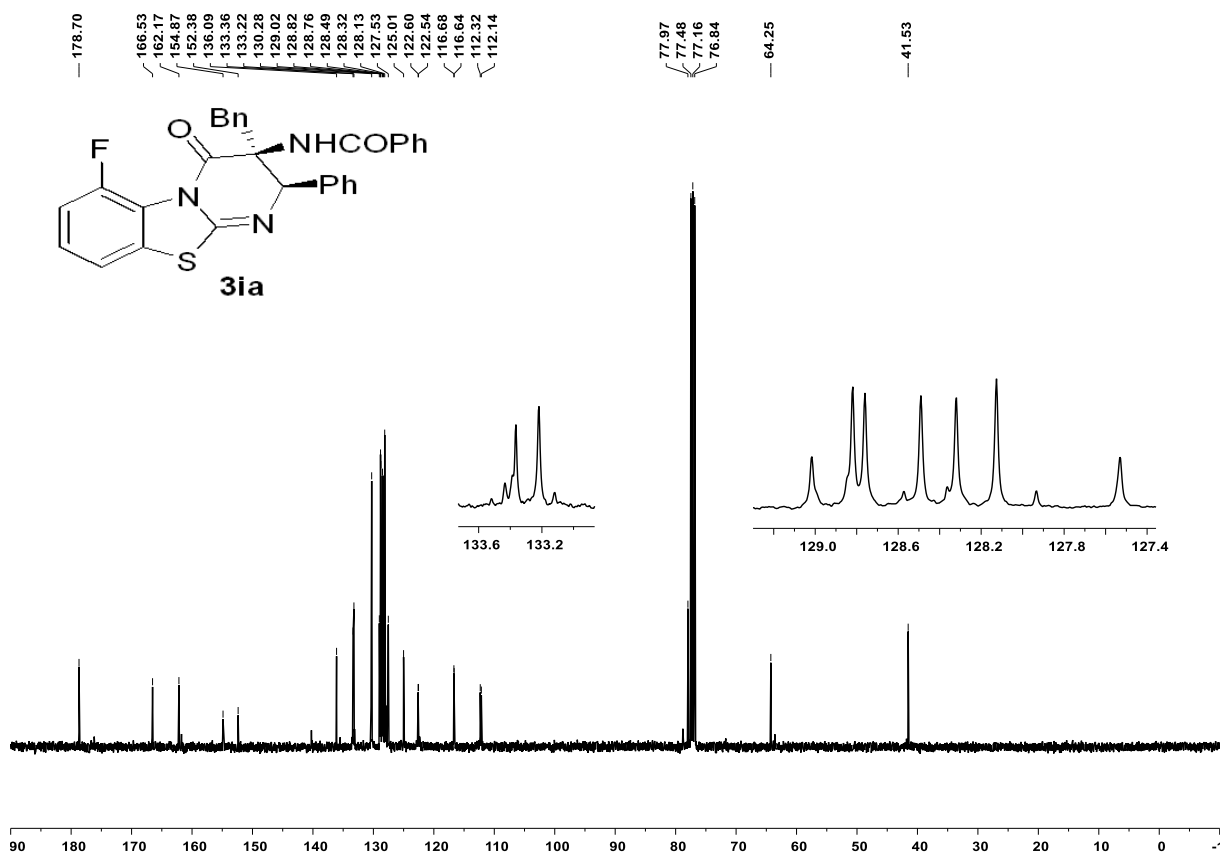

Figure S21.  $^{19}\text{F}\{^1\text{H}\}$  NMR of **3ia**

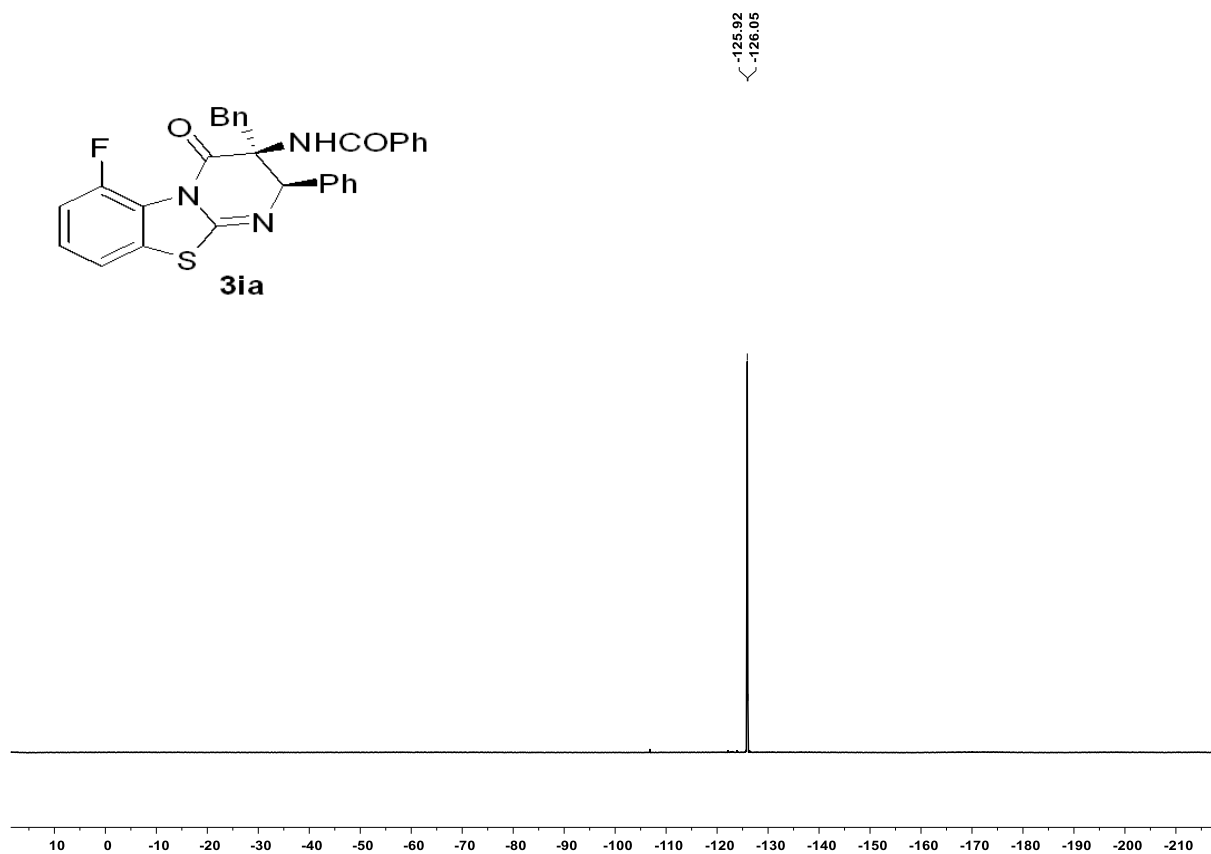

Figure S22.  $^1\text{H}$  NMR of **3ja**

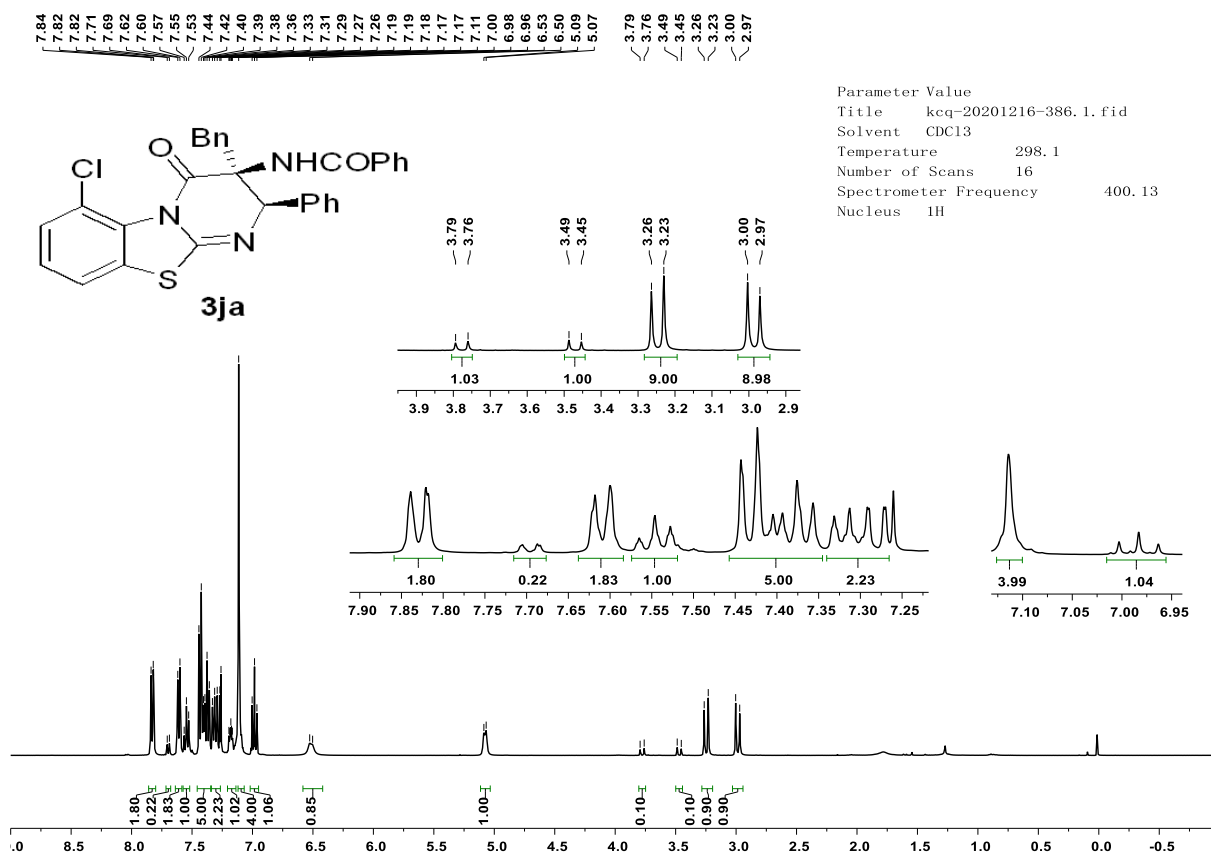



Figure S23. <sup>13</sup>C NMR of 3ja

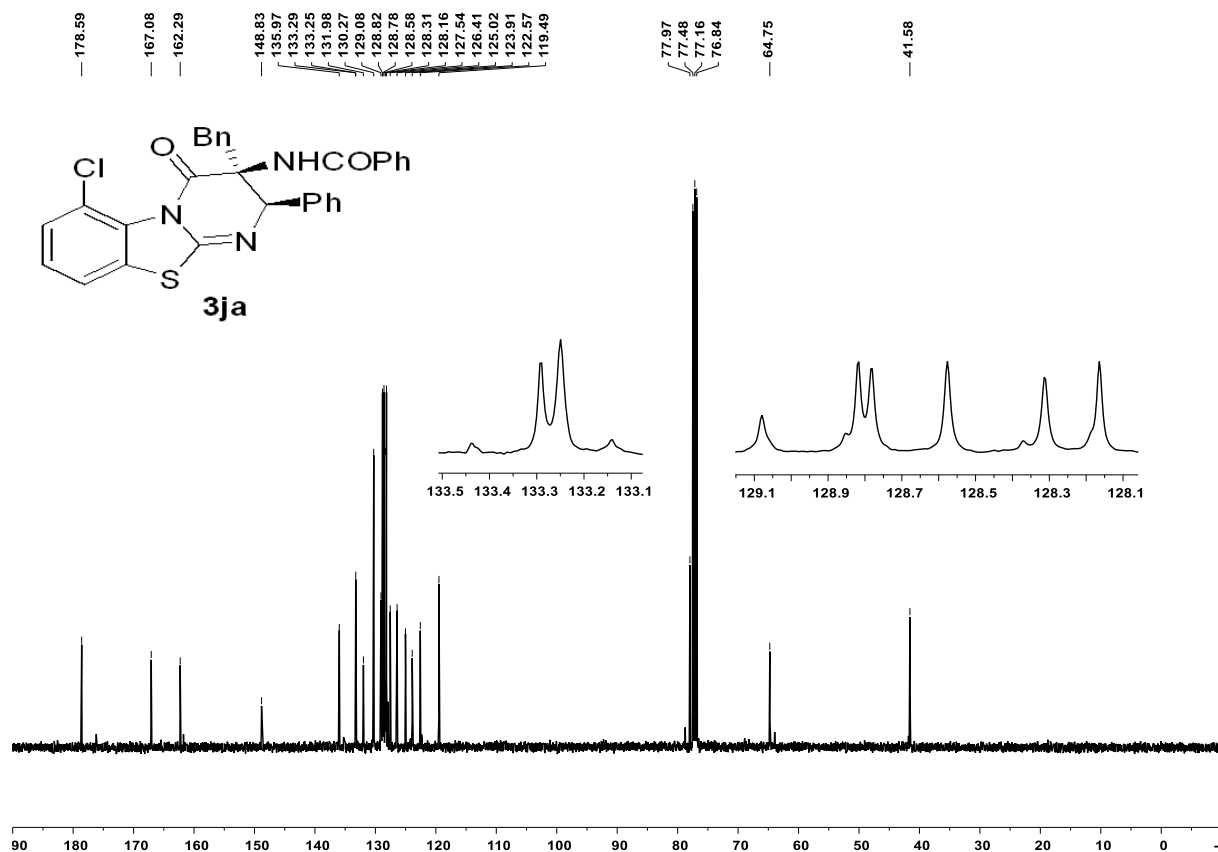

Figure S24. <sup>1</sup>H NMR of 3ka

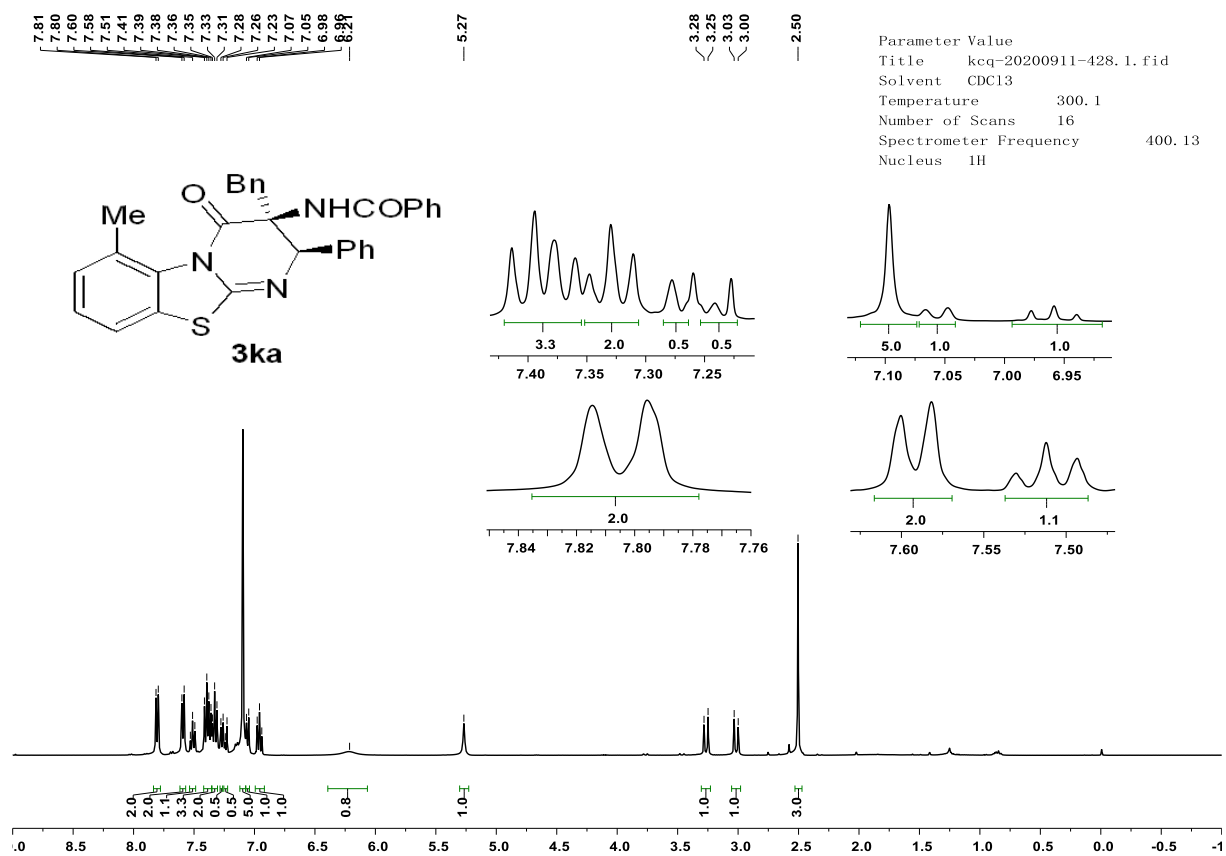

Figure S25. <sup>13</sup>C NMR of 3ka

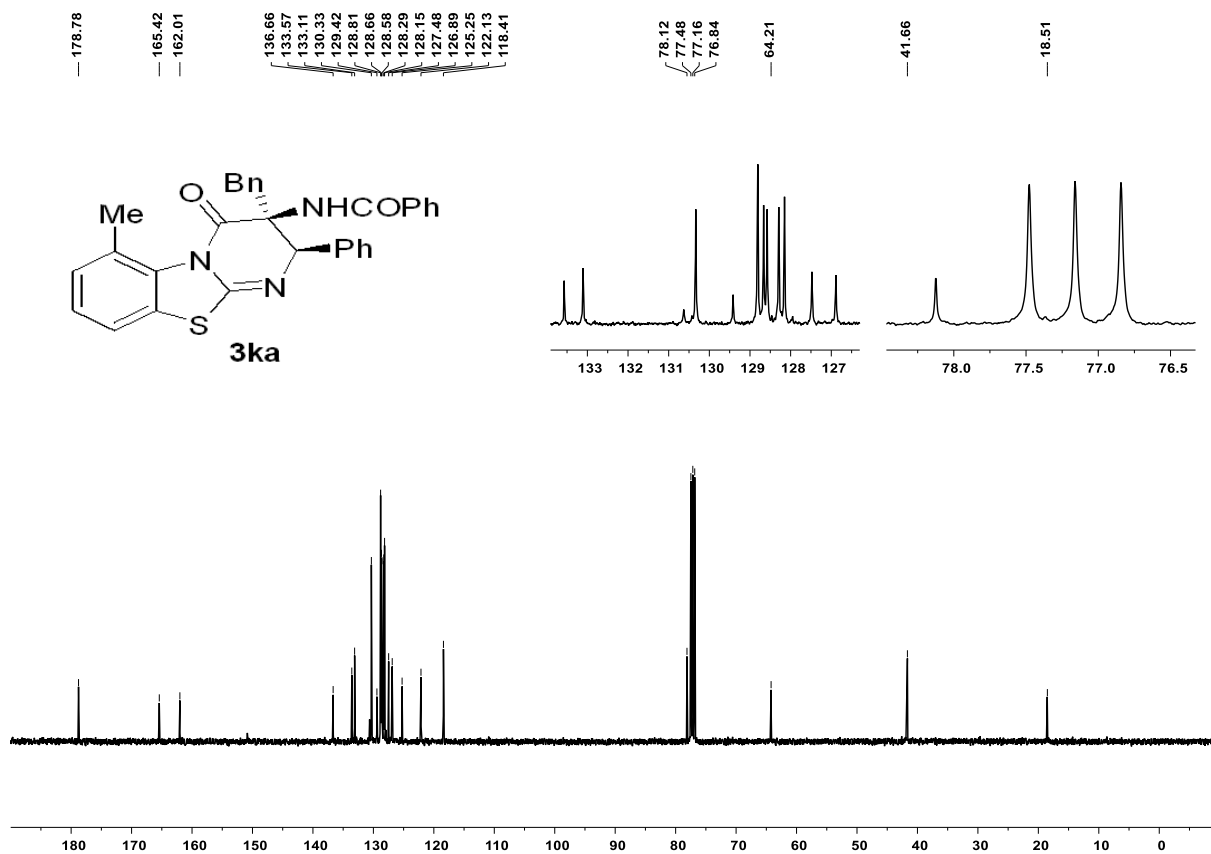

Figure S26. <sup>1</sup>H NMR of 3la

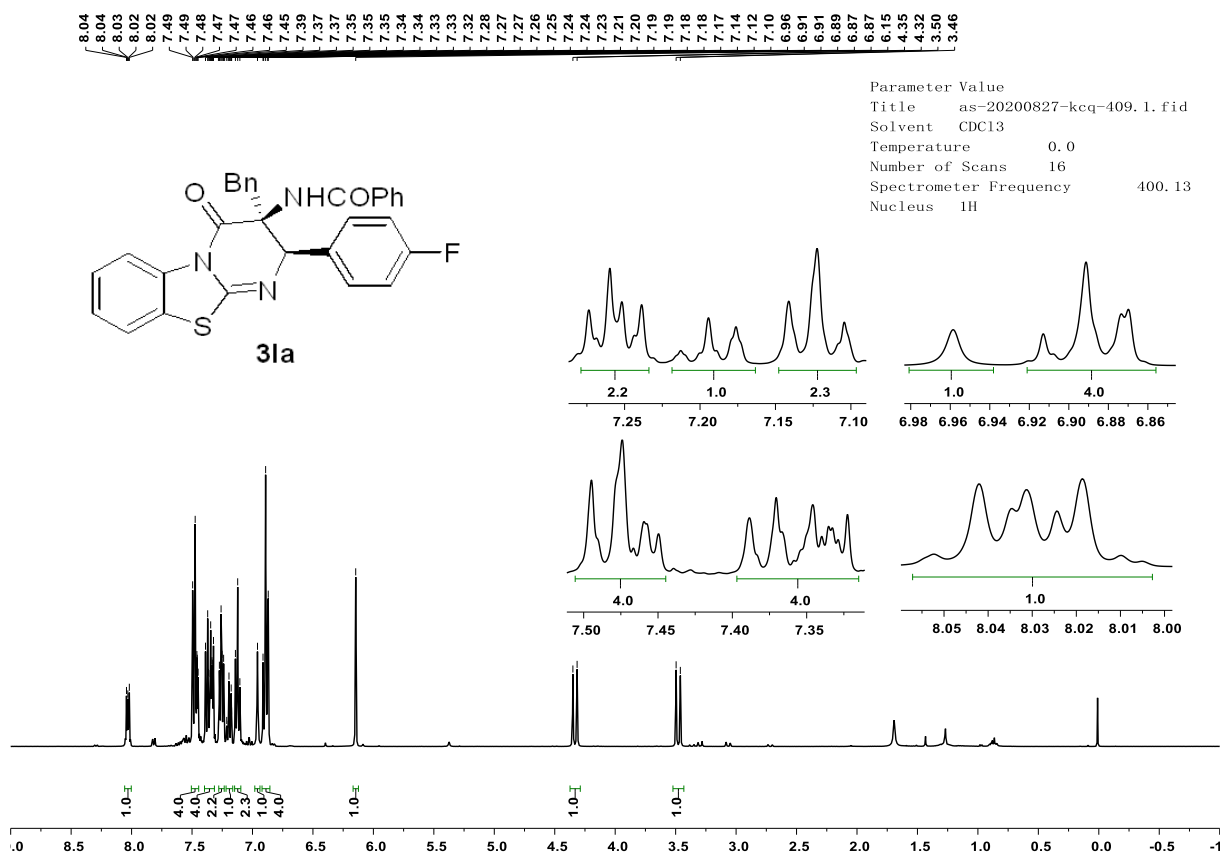

Figure S27.  $^{13}\text{C}$  NMR of 3la

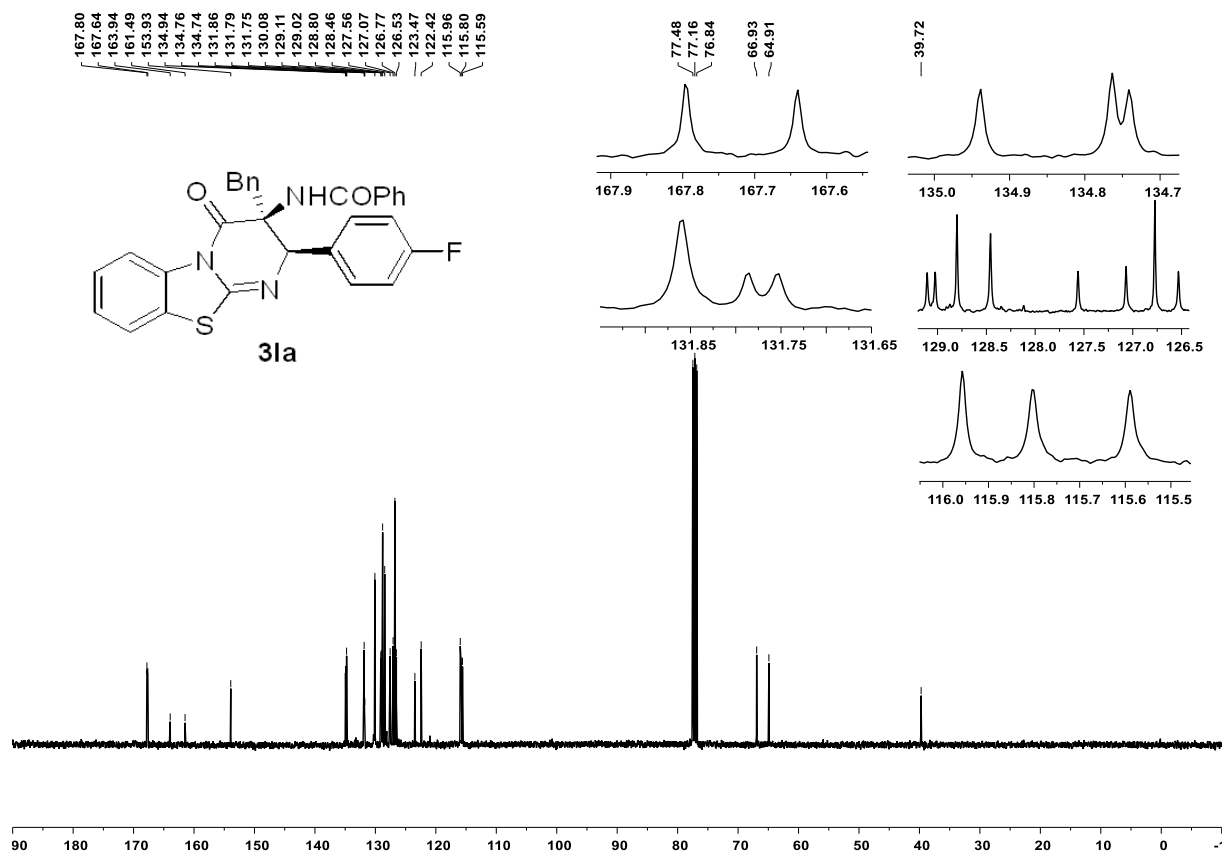

Figure S28.  $^{19}\text{F}\{^1\text{H}\}$  NMR of 3la

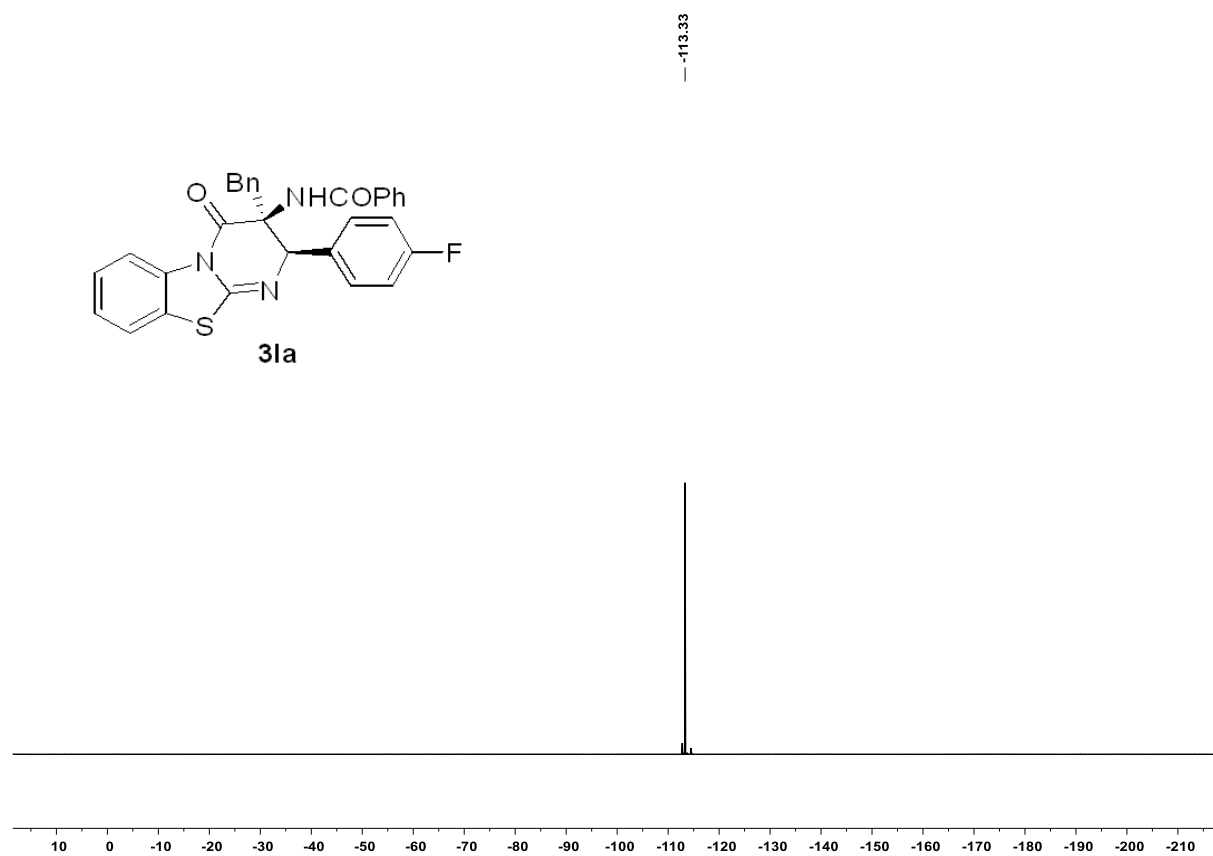

Figure S29. <sup>1</sup>H NMR of 3ma

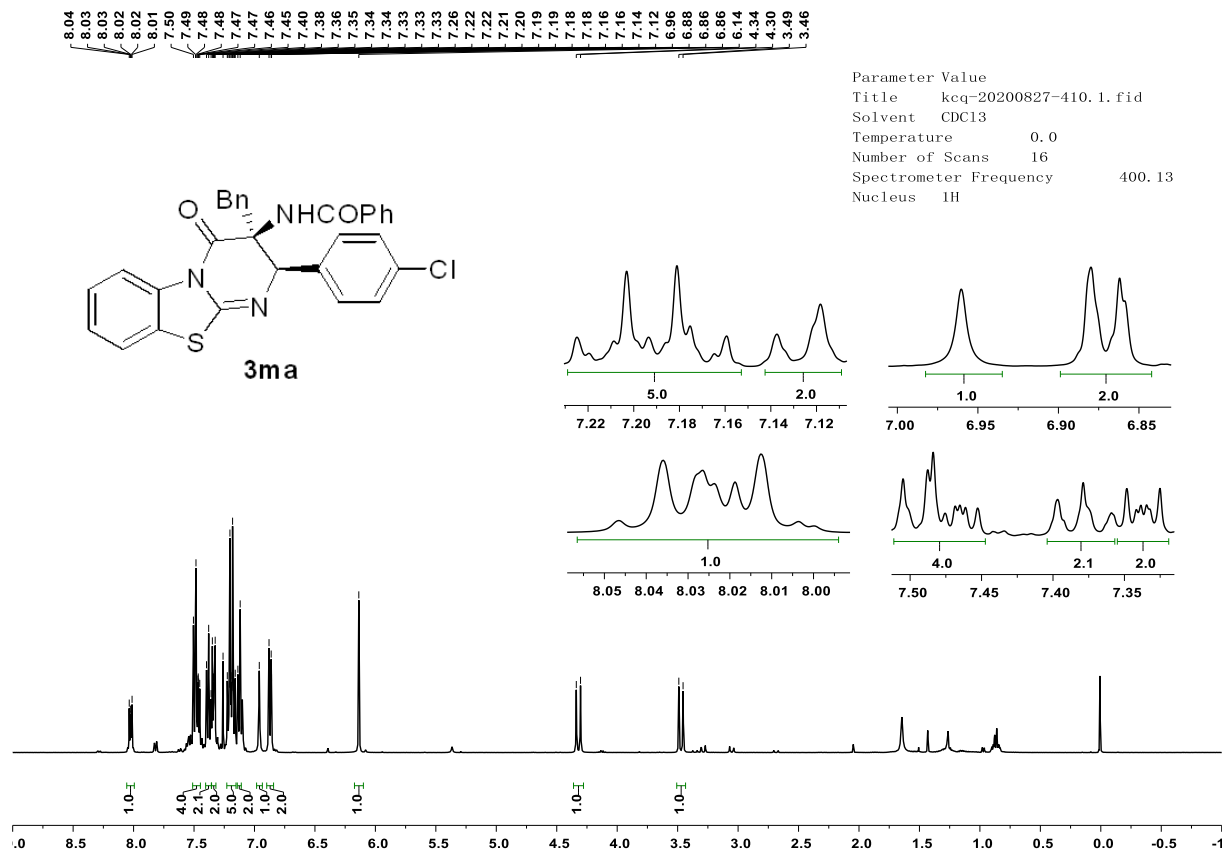

Figure S30. <sup>13</sup>C NMR of 3ma

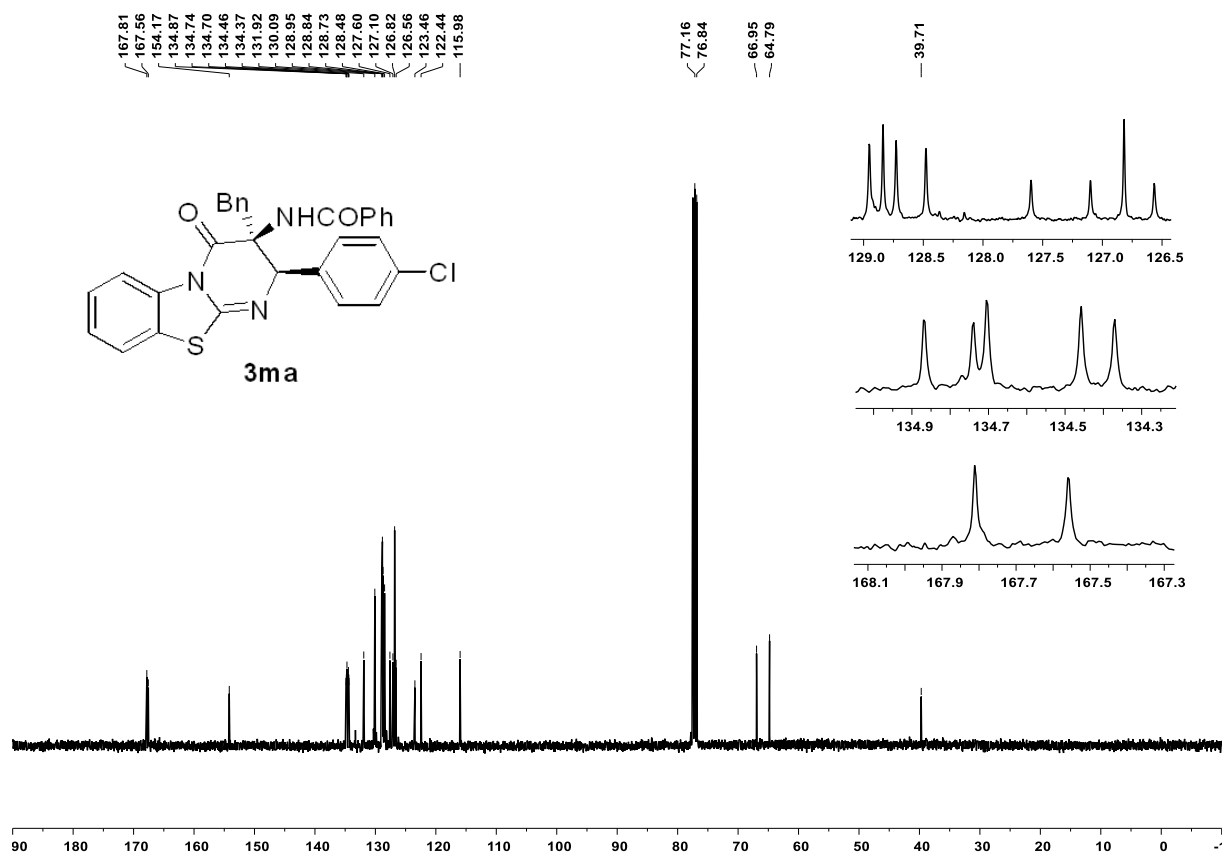

Figure S31. <sup>1</sup>H NMR of 3na

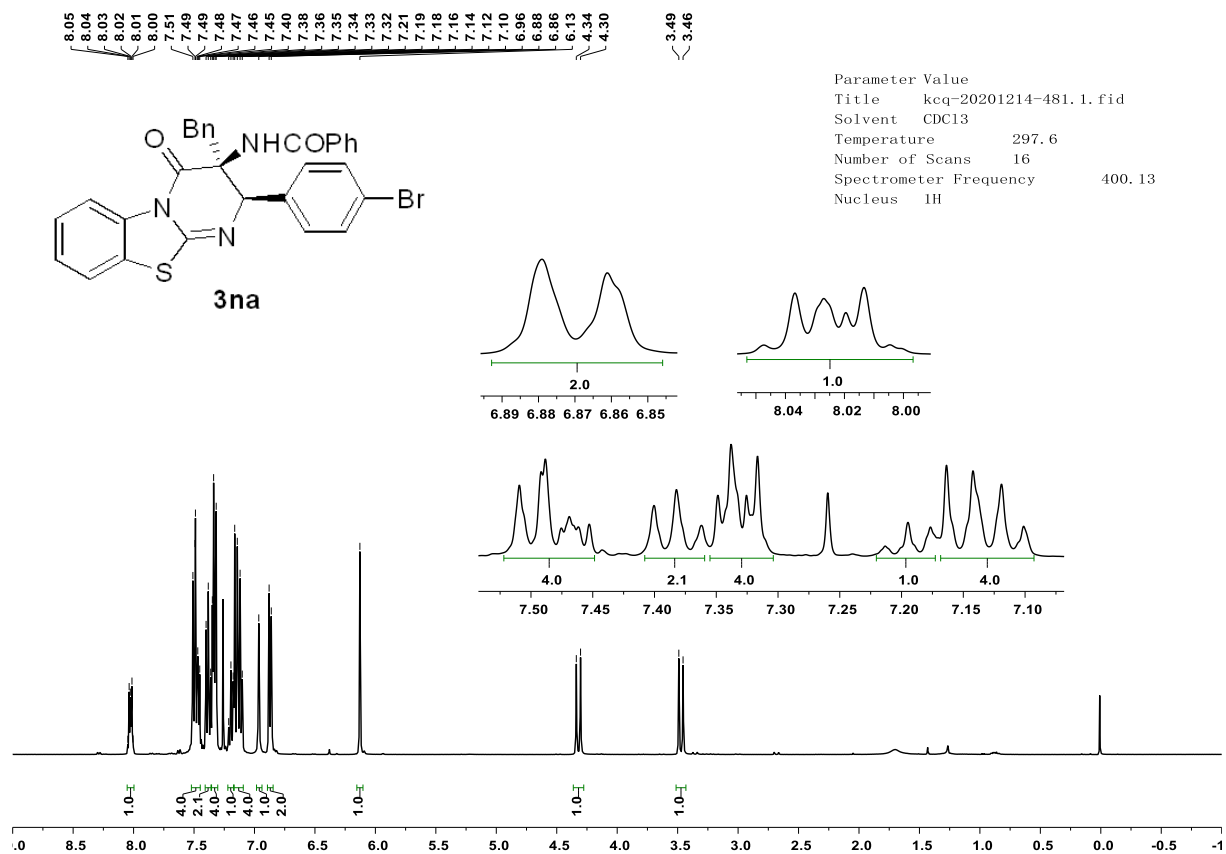

Figure S32. <sup>13</sup>C NMR of 3na

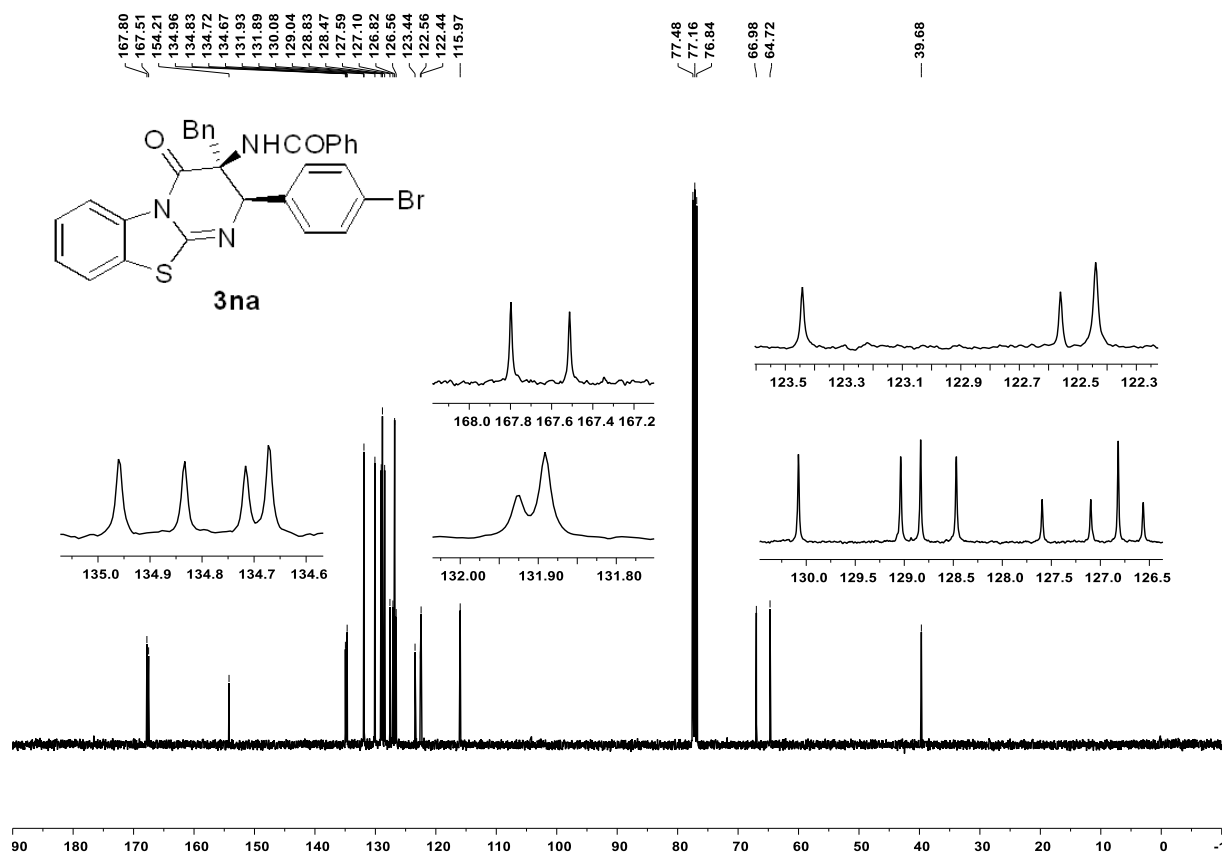

Figure S33. <sup>1</sup>H NMR of 30a

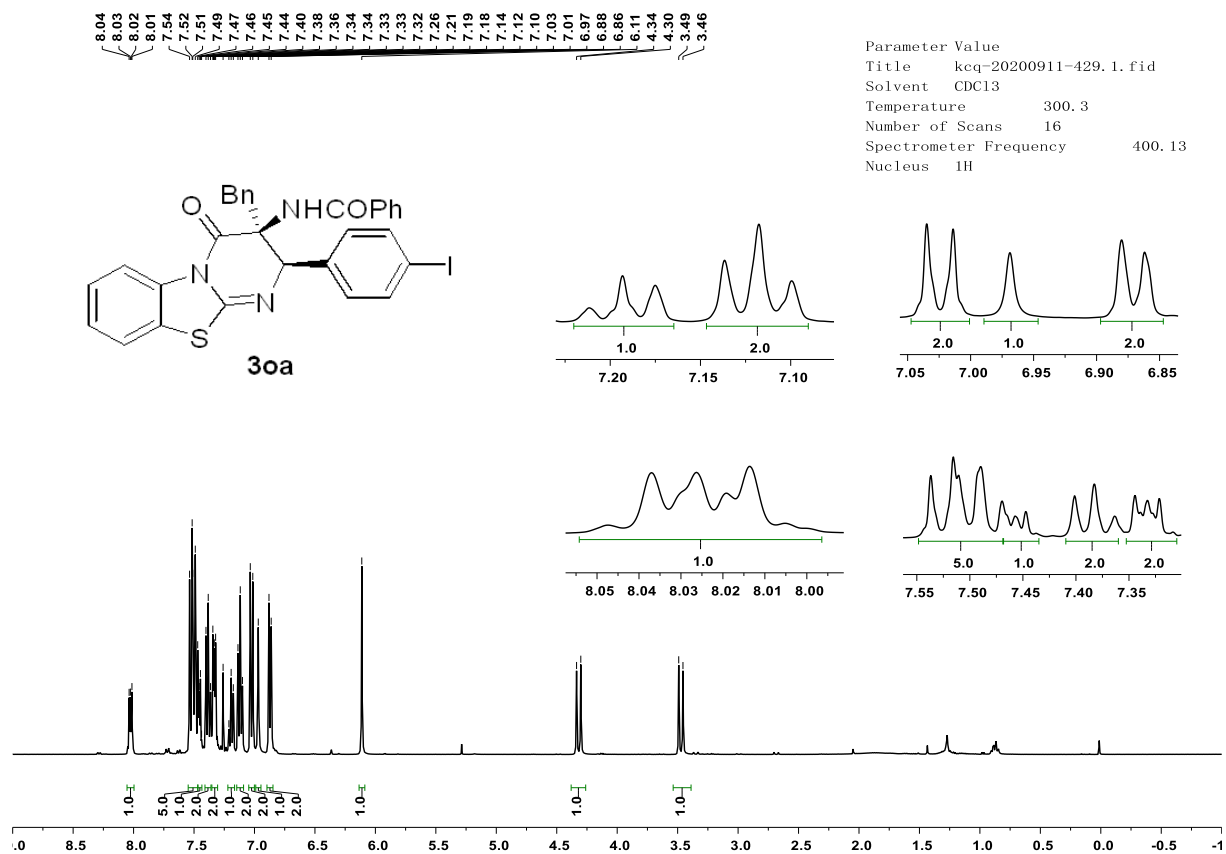

Figure S34. <sup>13</sup>C NMR of 30a

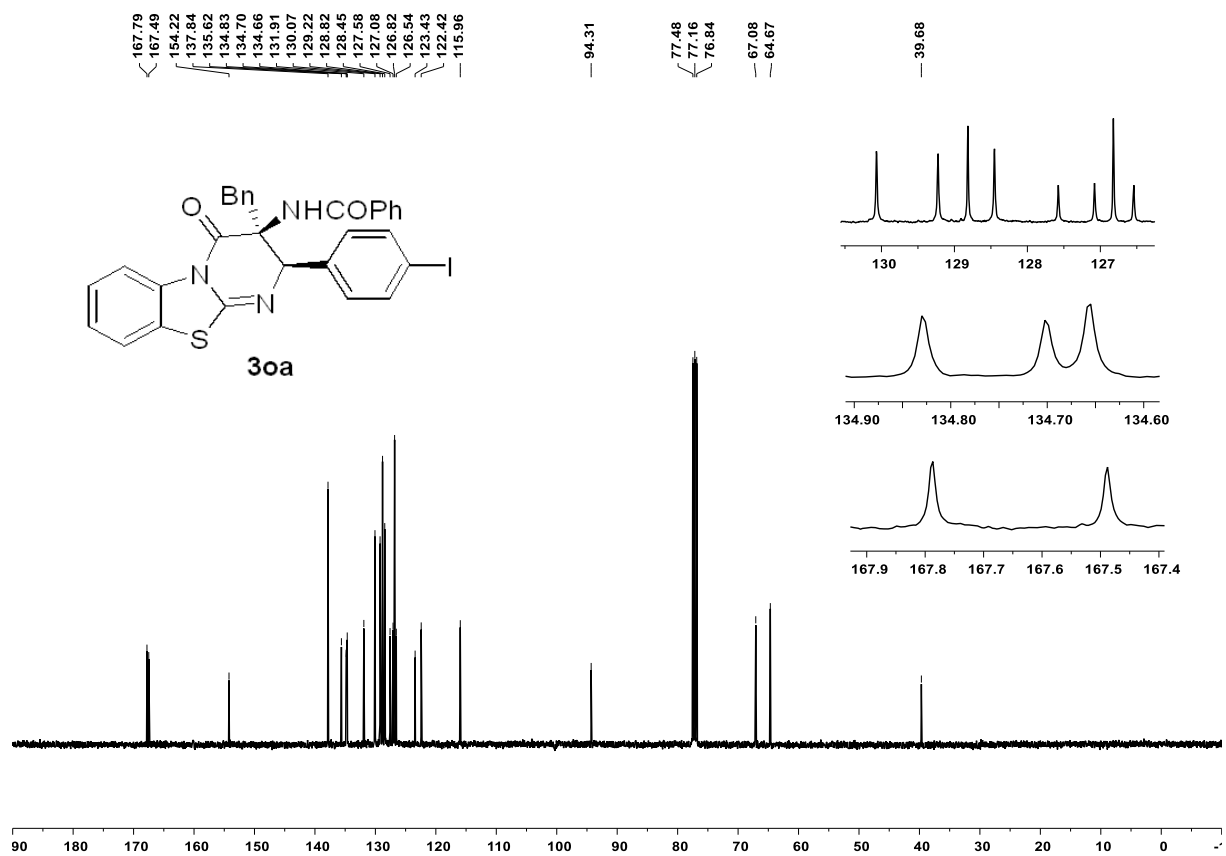

Figure S35. <sup>1</sup>H NMR of 3pa

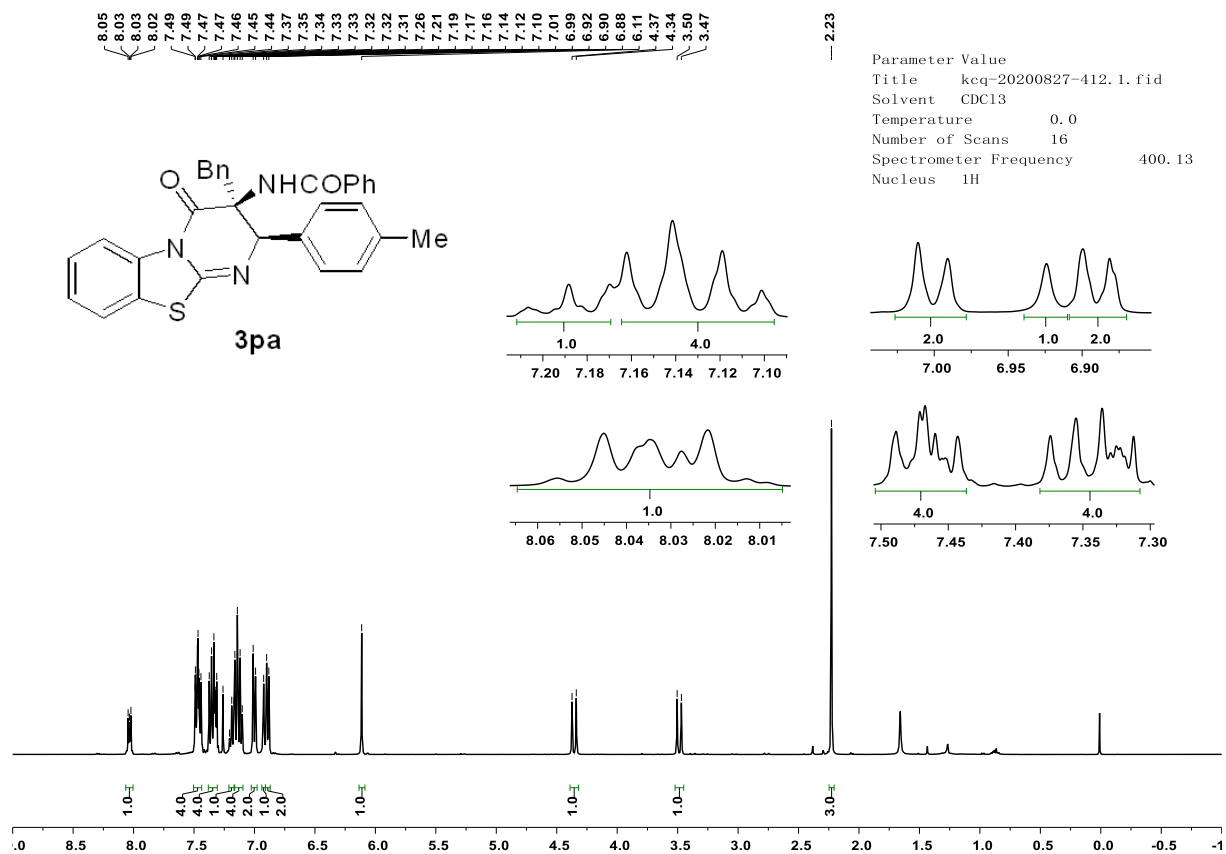

Figure S36. <sup>13</sup>C NMR of 3pa

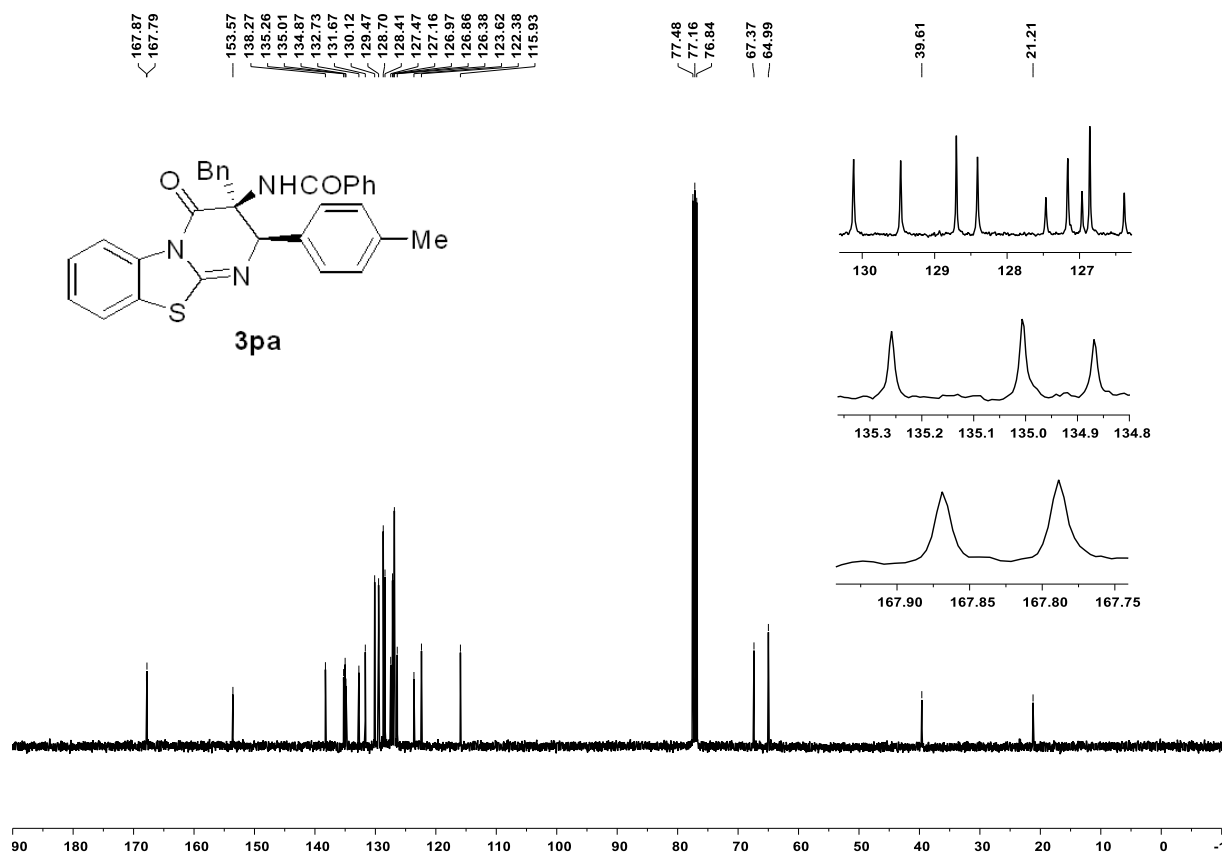

Figure S37. <sup>1</sup>H NMR of 3qa

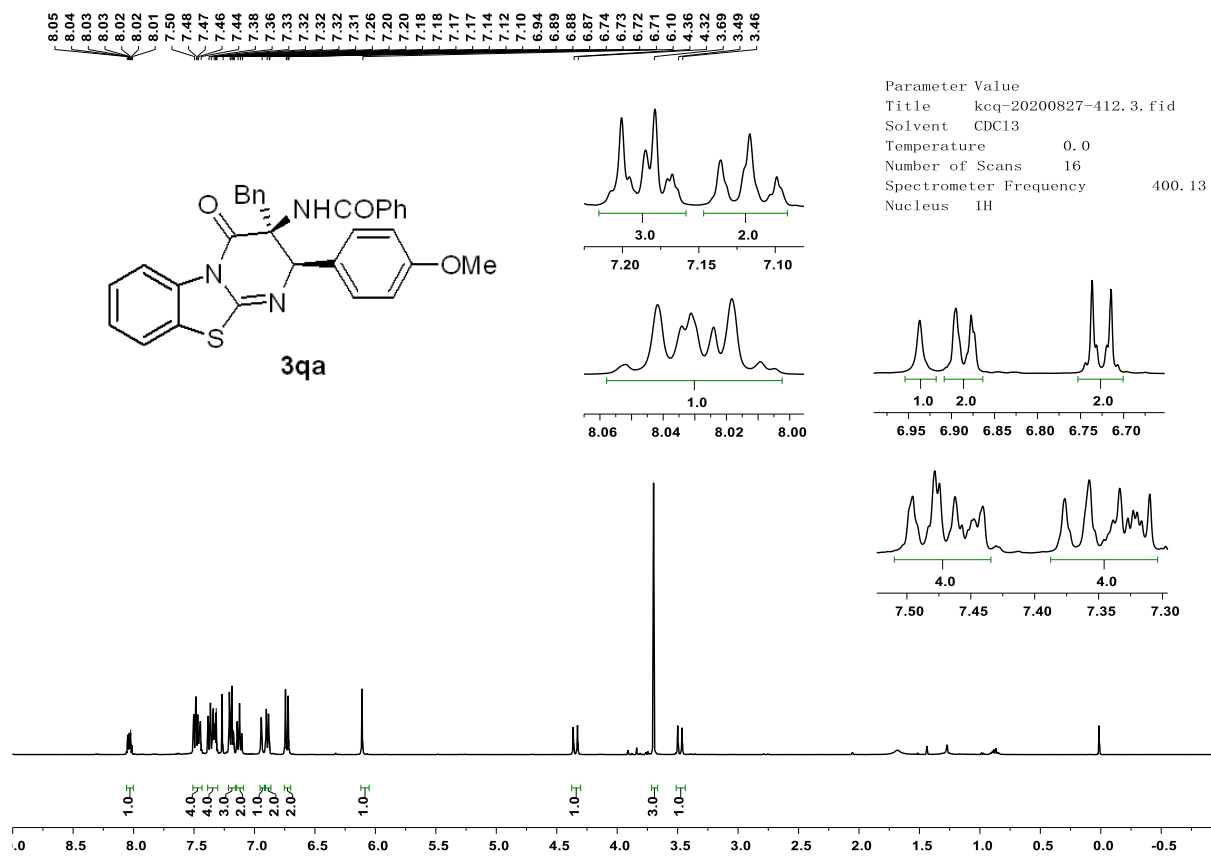

Figure S38. <sup>13</sup>C NMR of 3qa

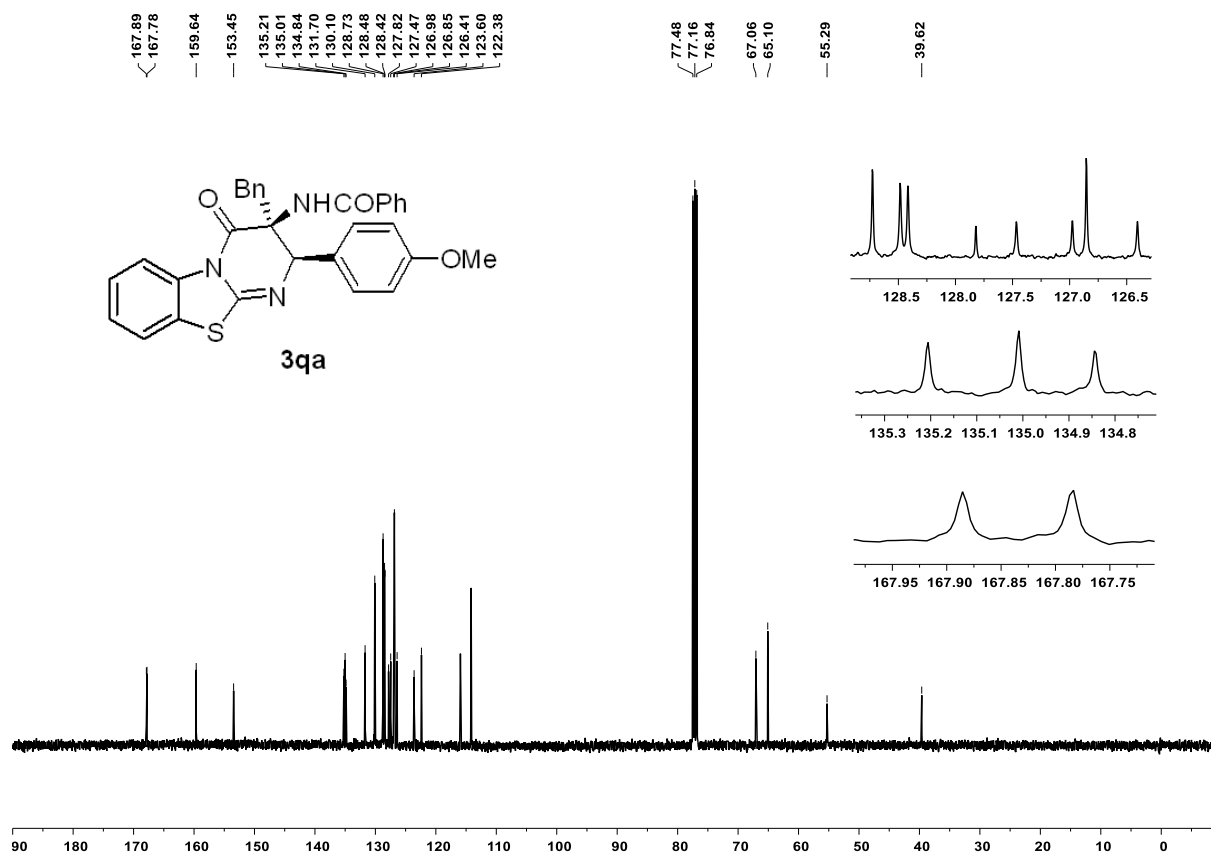



Figure S39. <sup>1</sup>H NMR of 3ra

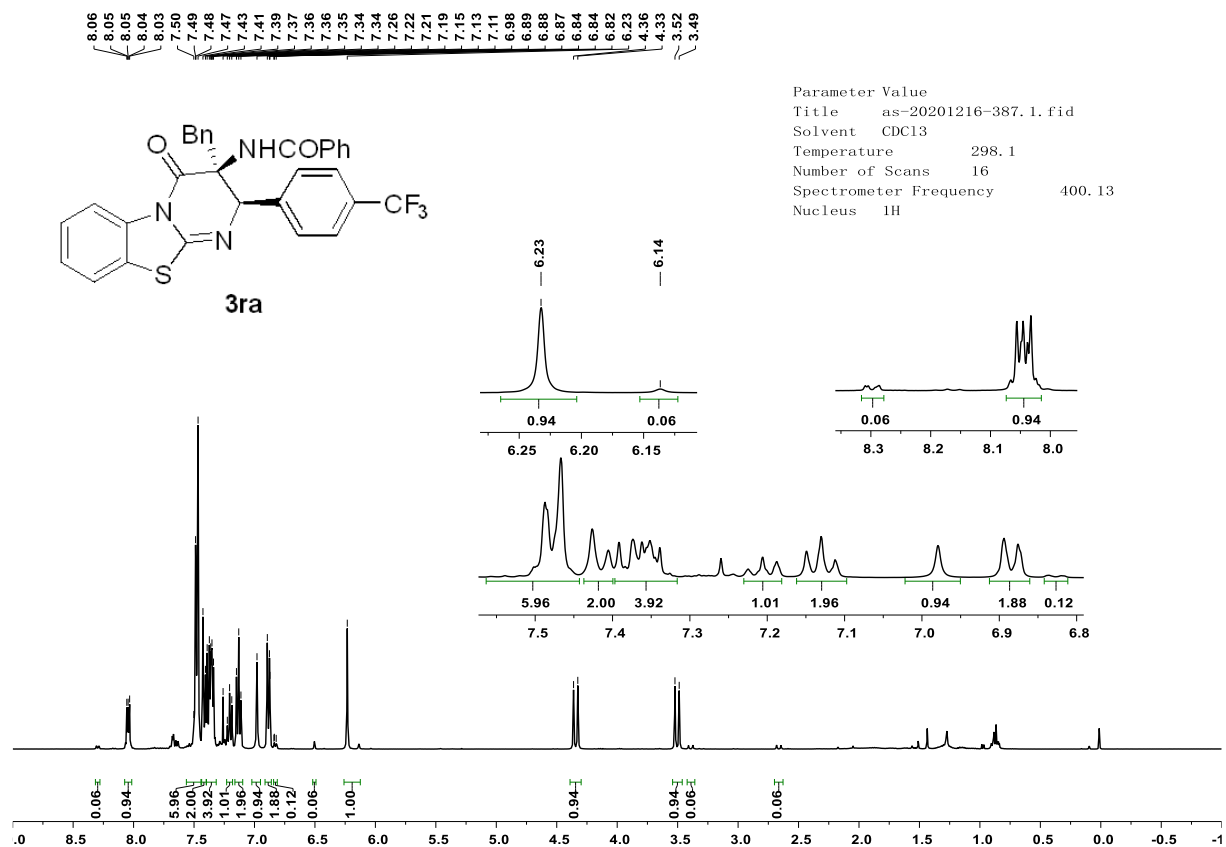

Figure S40. <sup>13</sup>C NMR of 3ra

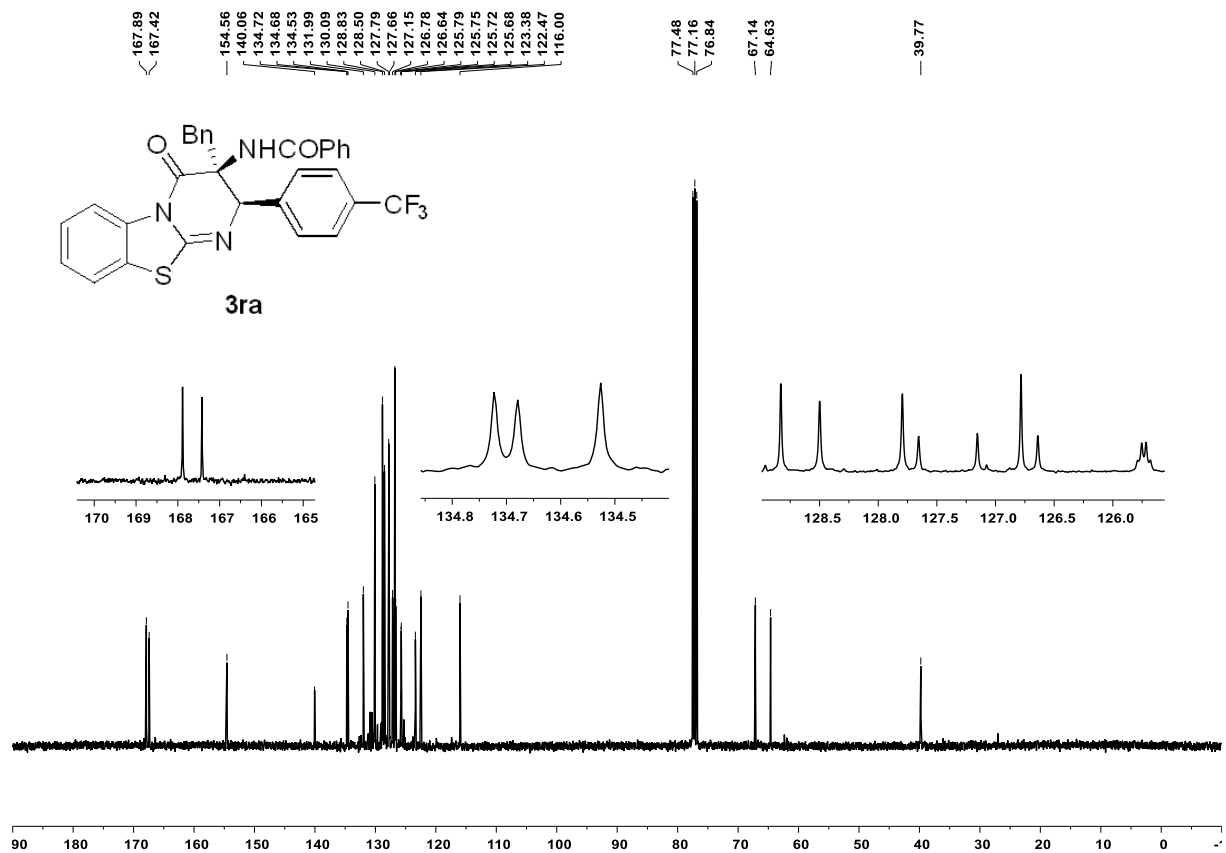

Figure S41.  $^{19}\text{F}\{^1\text{H}\}$  NMR of 3ra

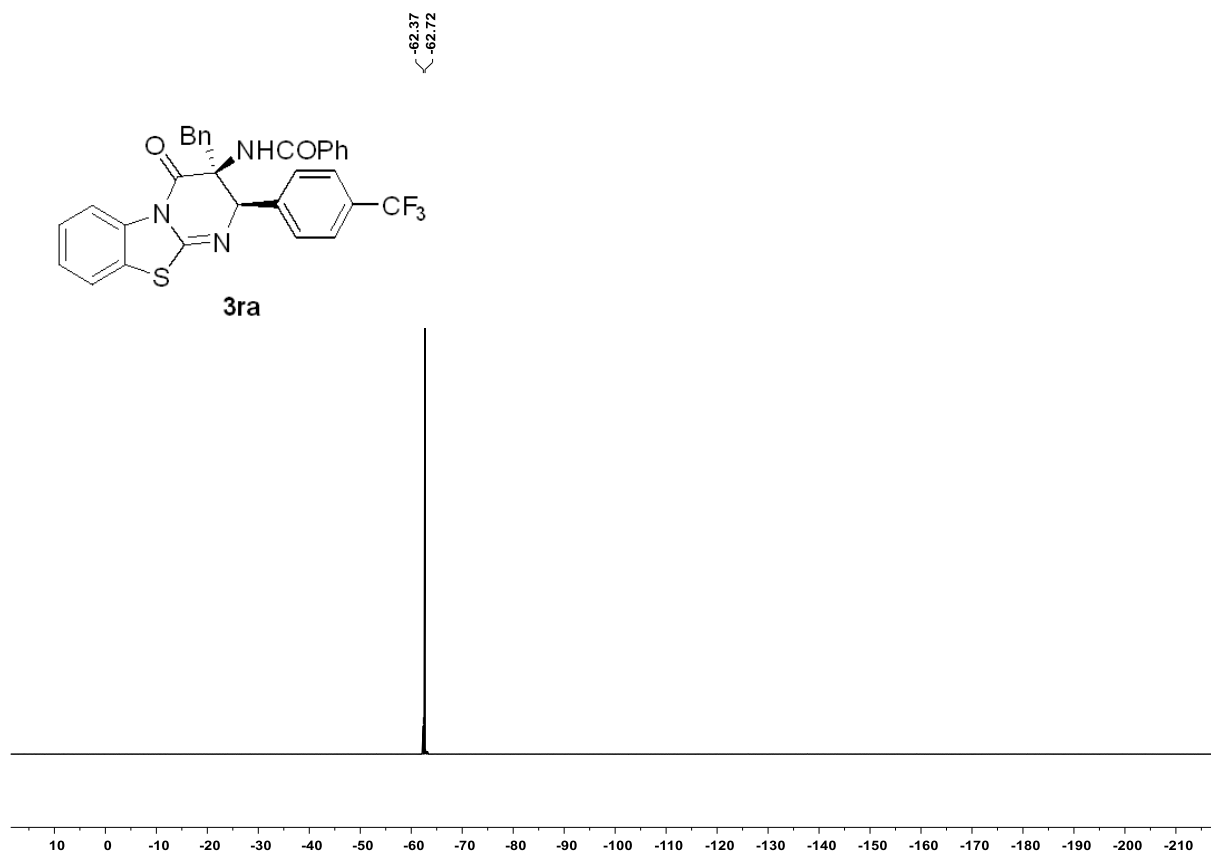

Figure S42.  $^1\text{H}$  NMR of 3sa

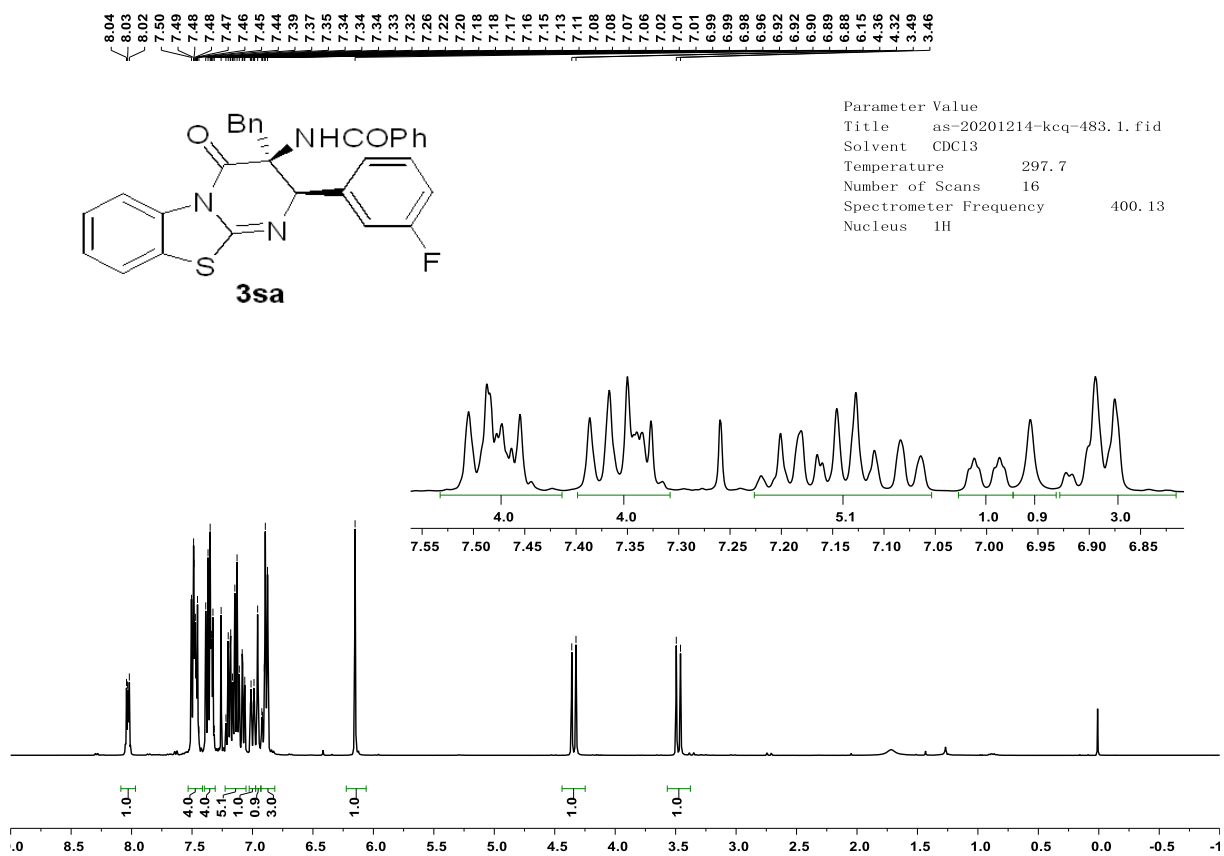

Figure S43.  $^{13}\text{C}$  NMR of 3sa

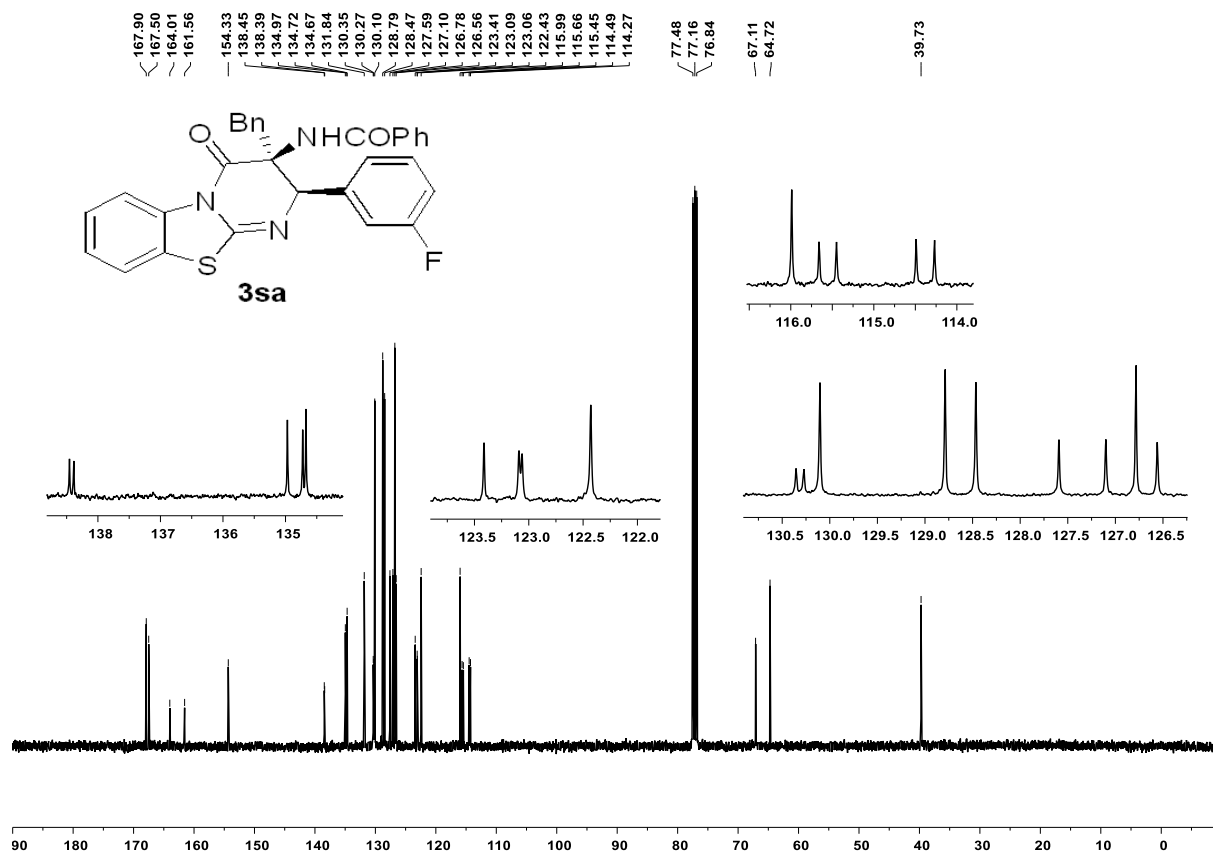

Figure S44.  $^{19}\text{F}\{^1\text{H}\}$  NMR of 3sa

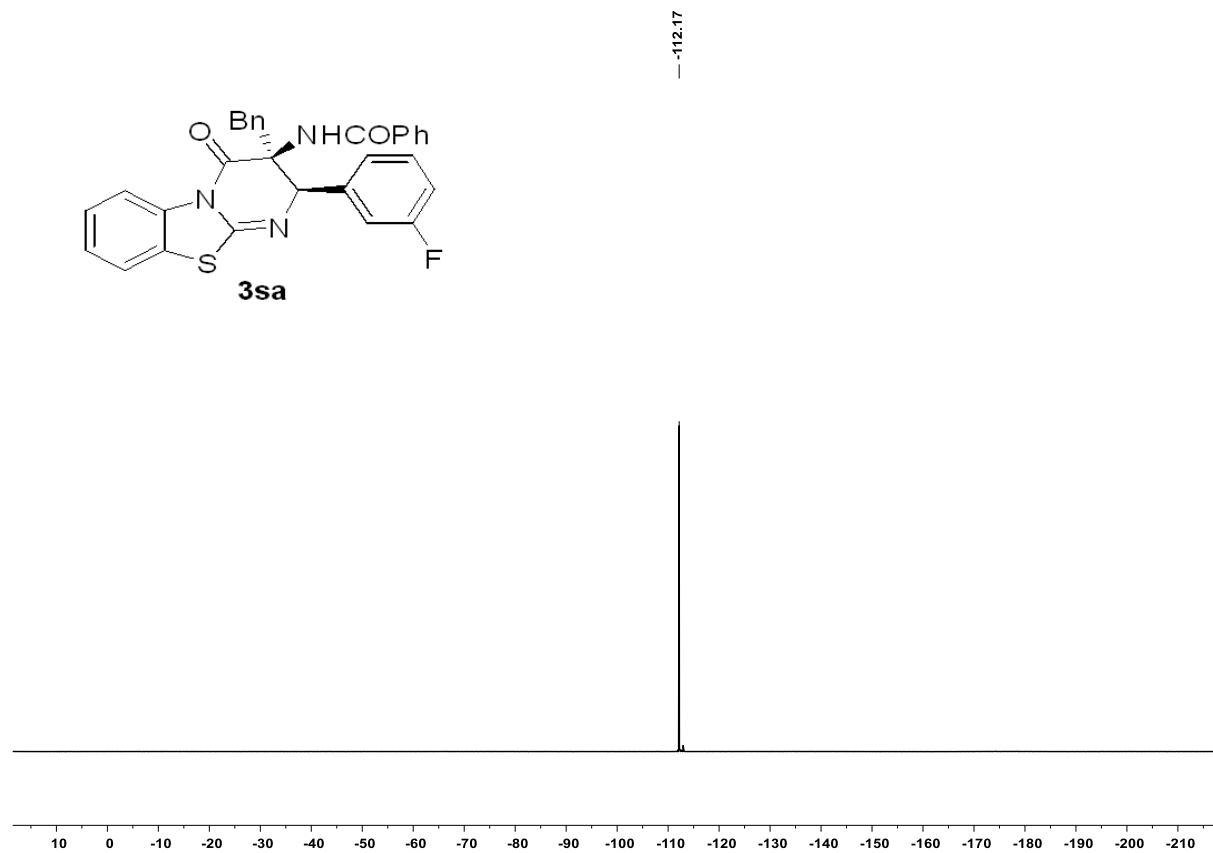

Figure S45. <sup>1</sup>H NMR of 3ta

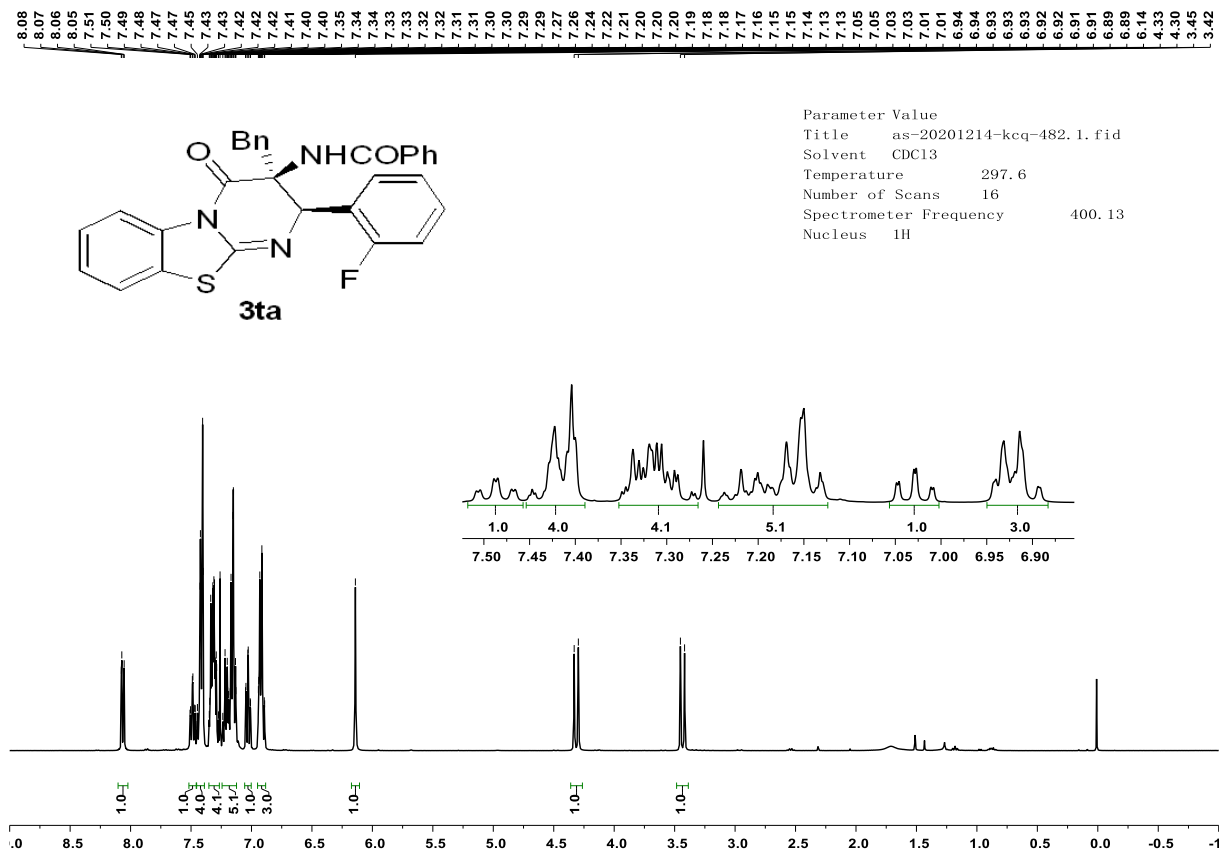

Figure S46. <sup>13</sup>C NMR of 3ta

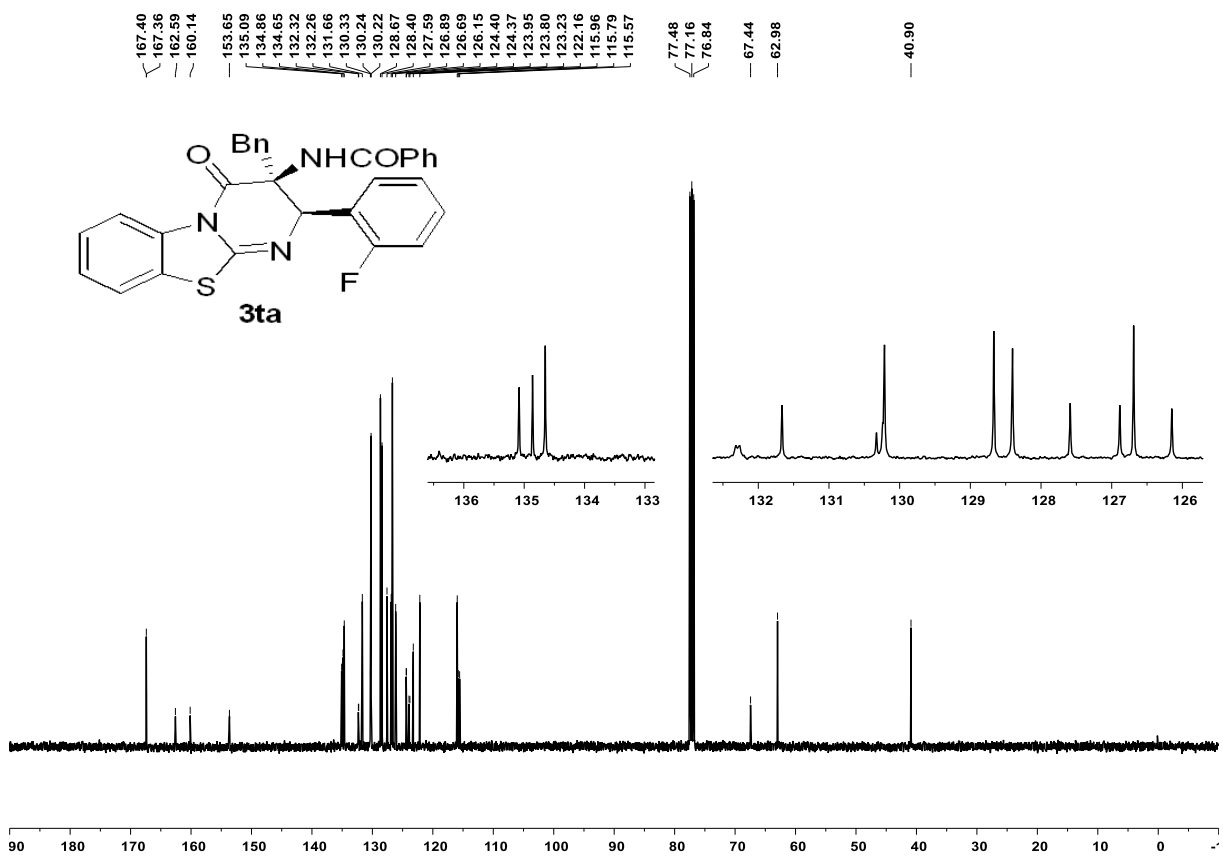



Figure S49. <sup>13</sup>C NMR of 3ua

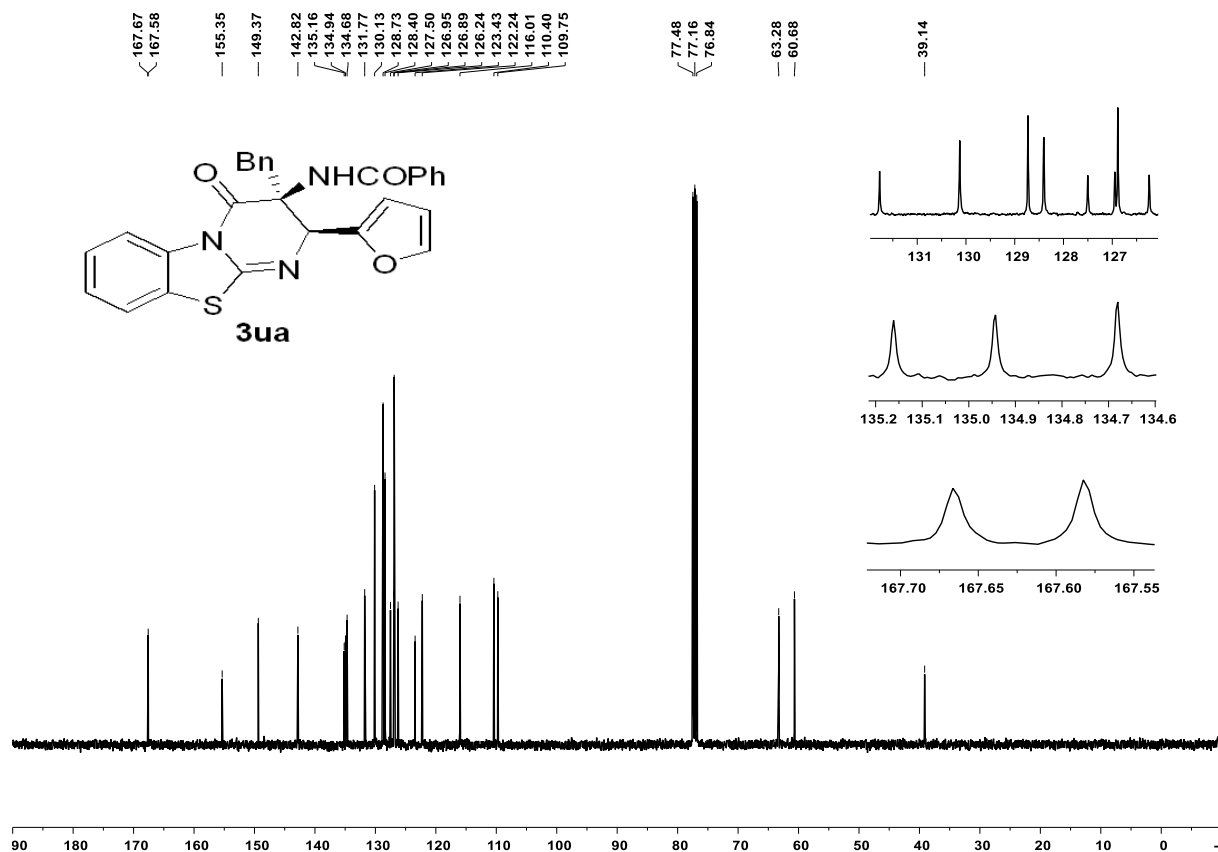

Figure S50. <sup>1</sup>H NMR of 3va

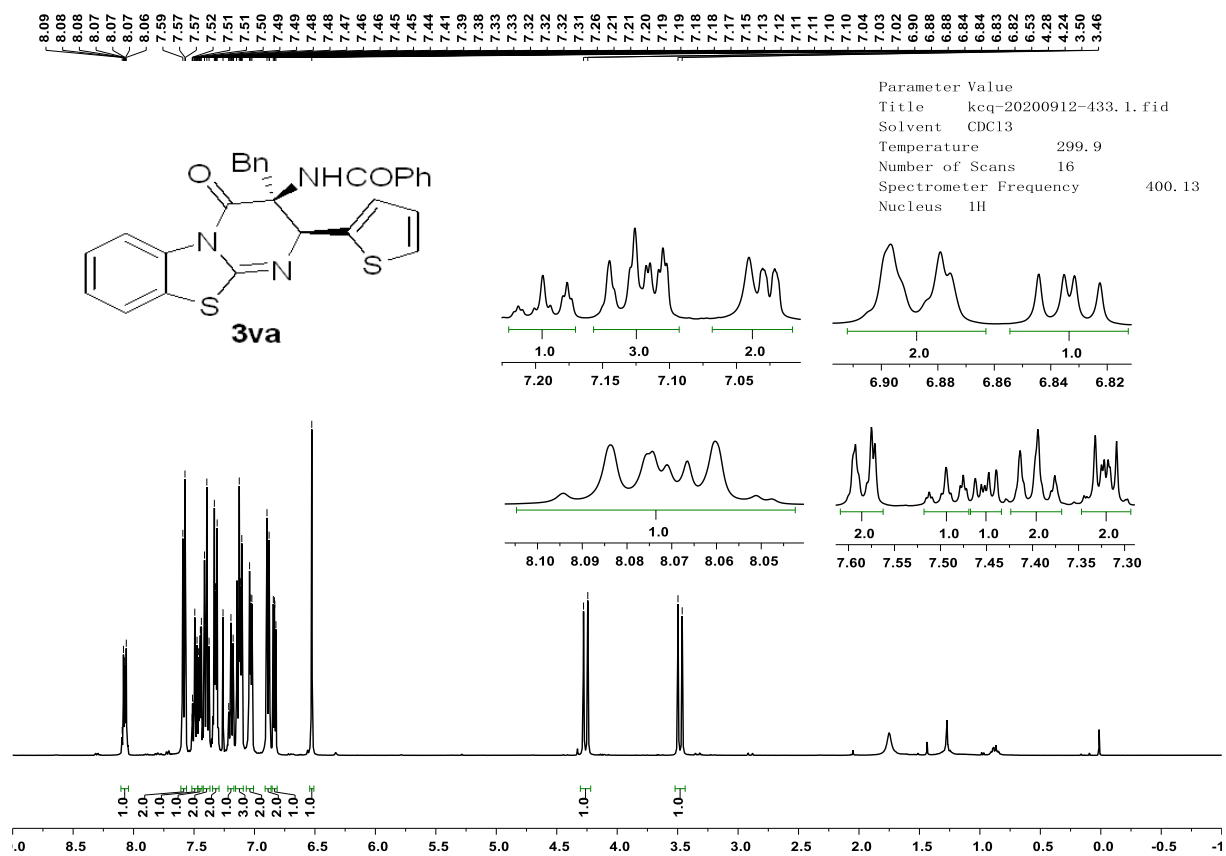

Figure S51.  $^{13}\text{C}$  NMR of 3va

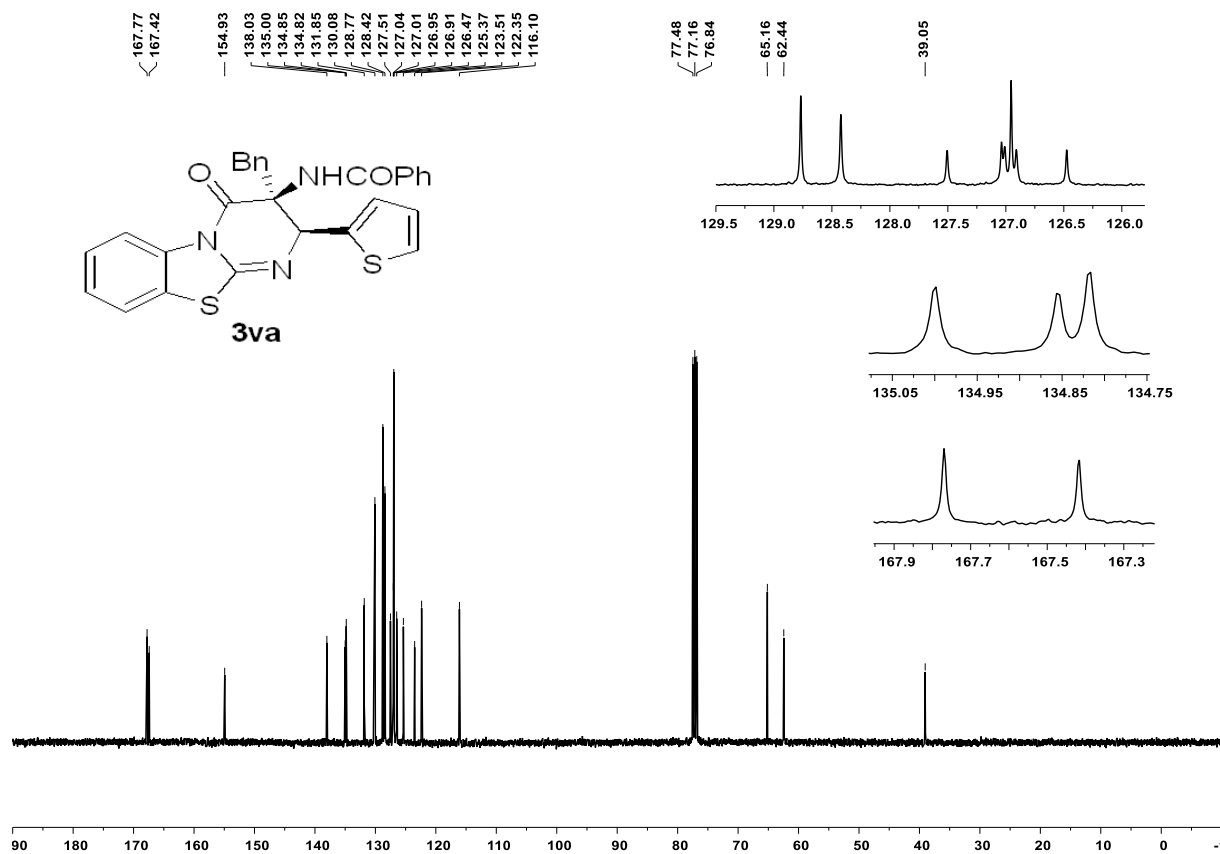

Figure S52.  $^1\text{H}$  NMR of 3wa

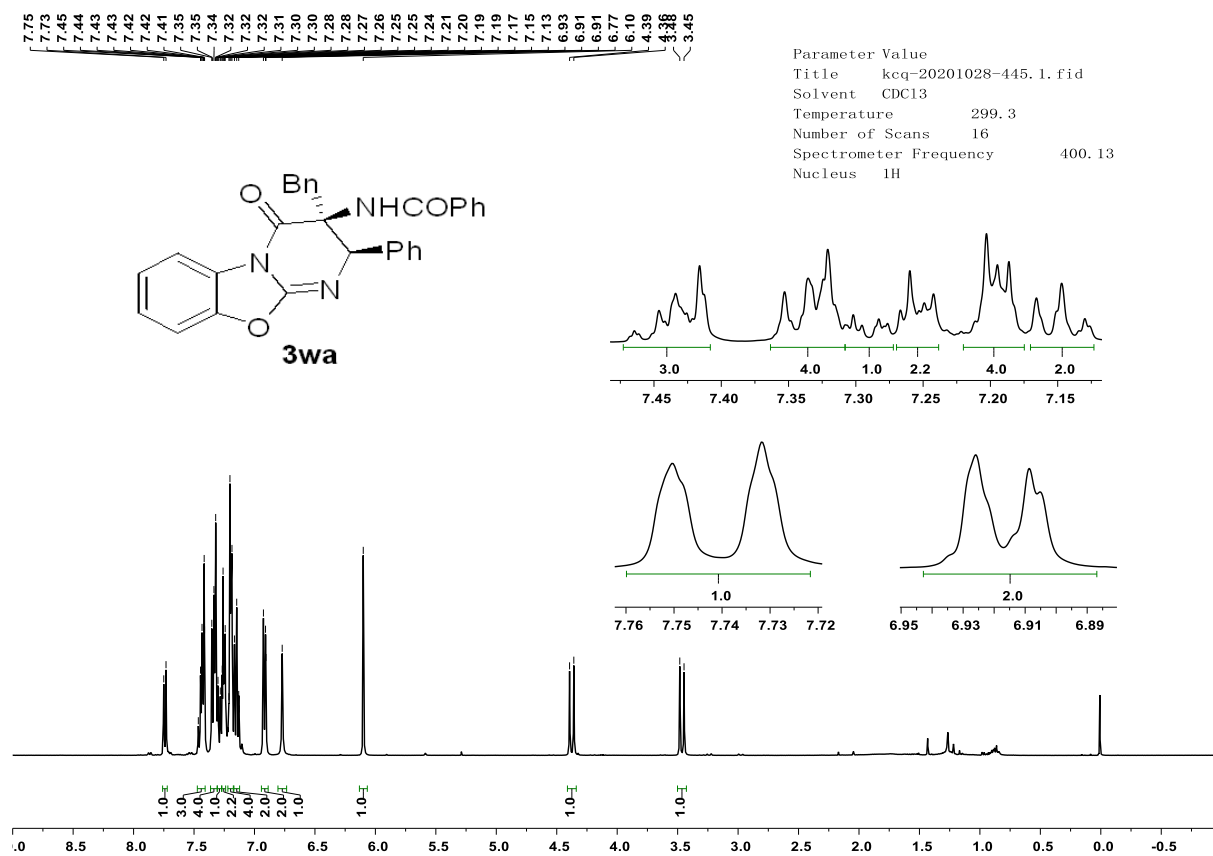

Figure S53. <sup>13</sup>C NMR of 3wa

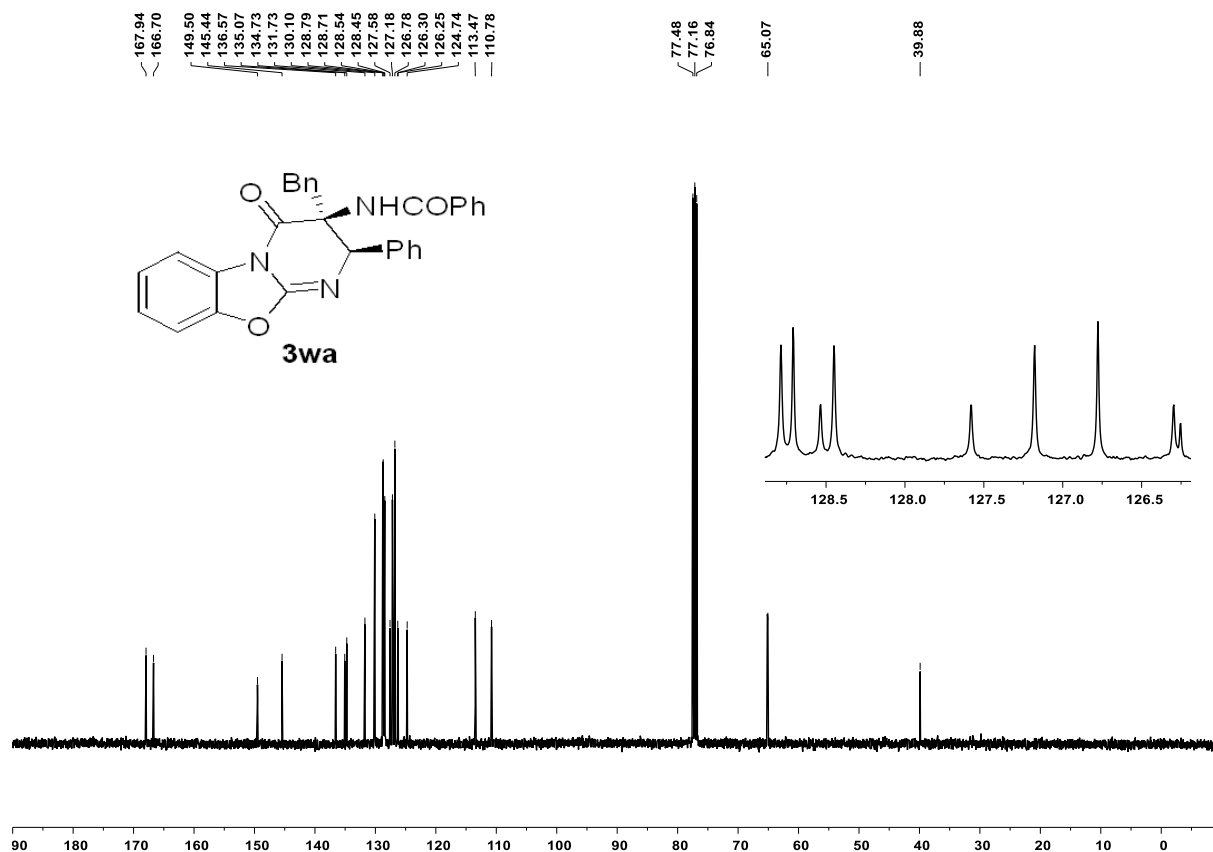

Figure S54. <sup>1</sup>H NMR of 3ab

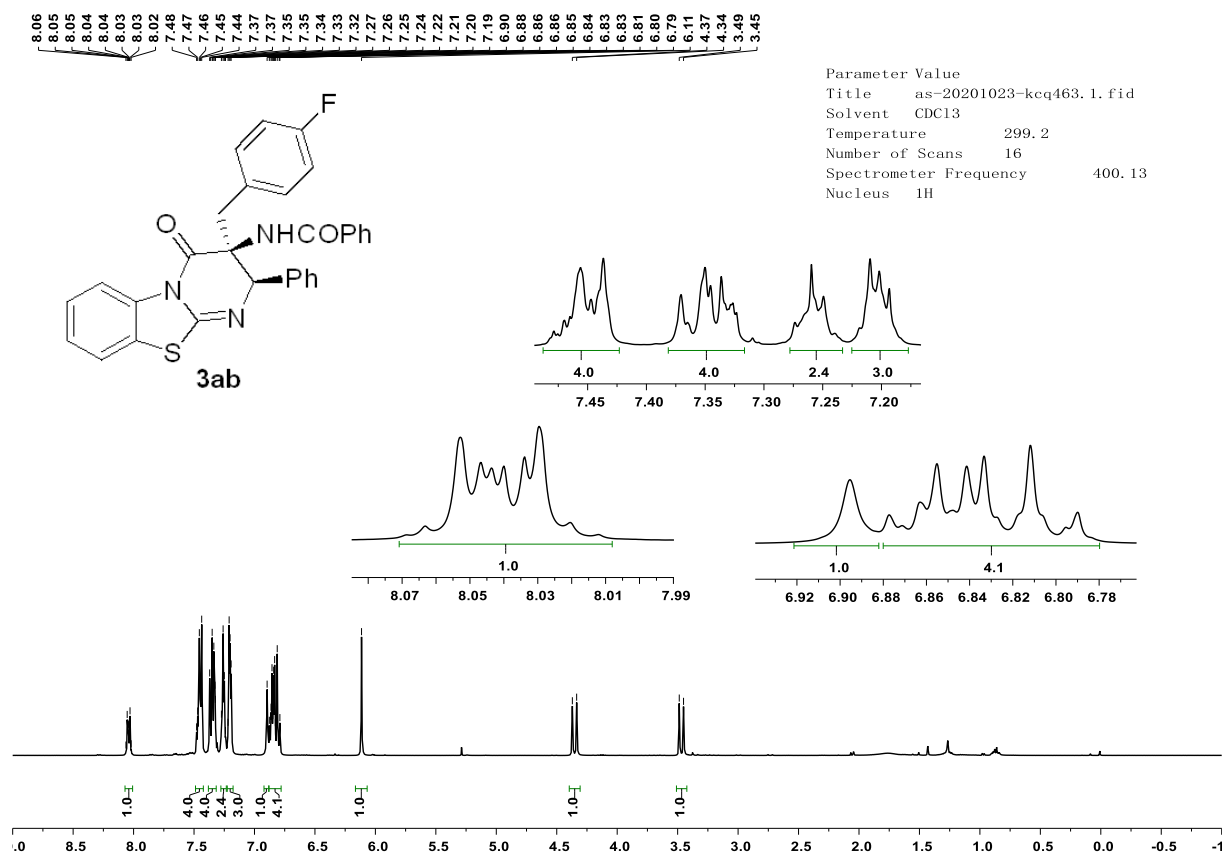



Figure S55.  $^{13}\text{C}$  NMR of 3ab

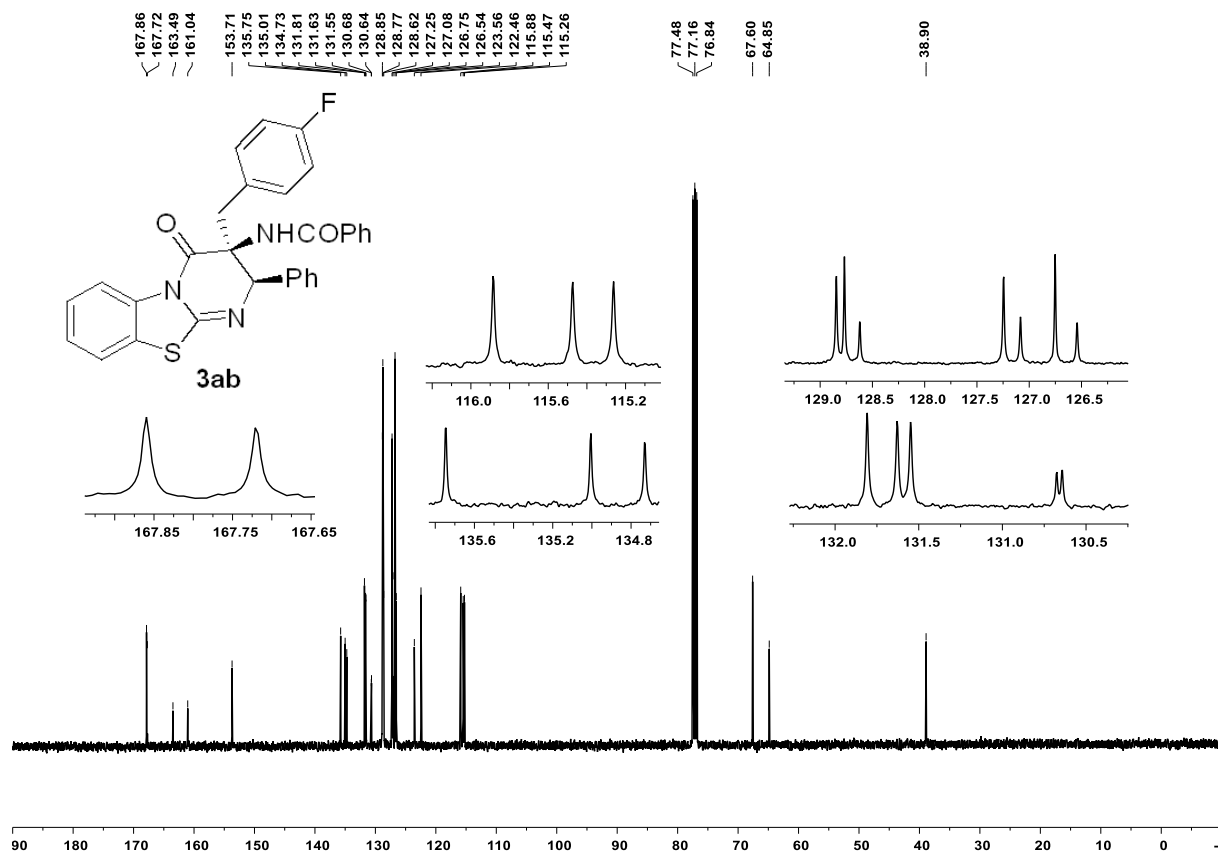

Figure S56.  $^{19}\text{F}\{^1\text{H}\}$  NMR of 3ab

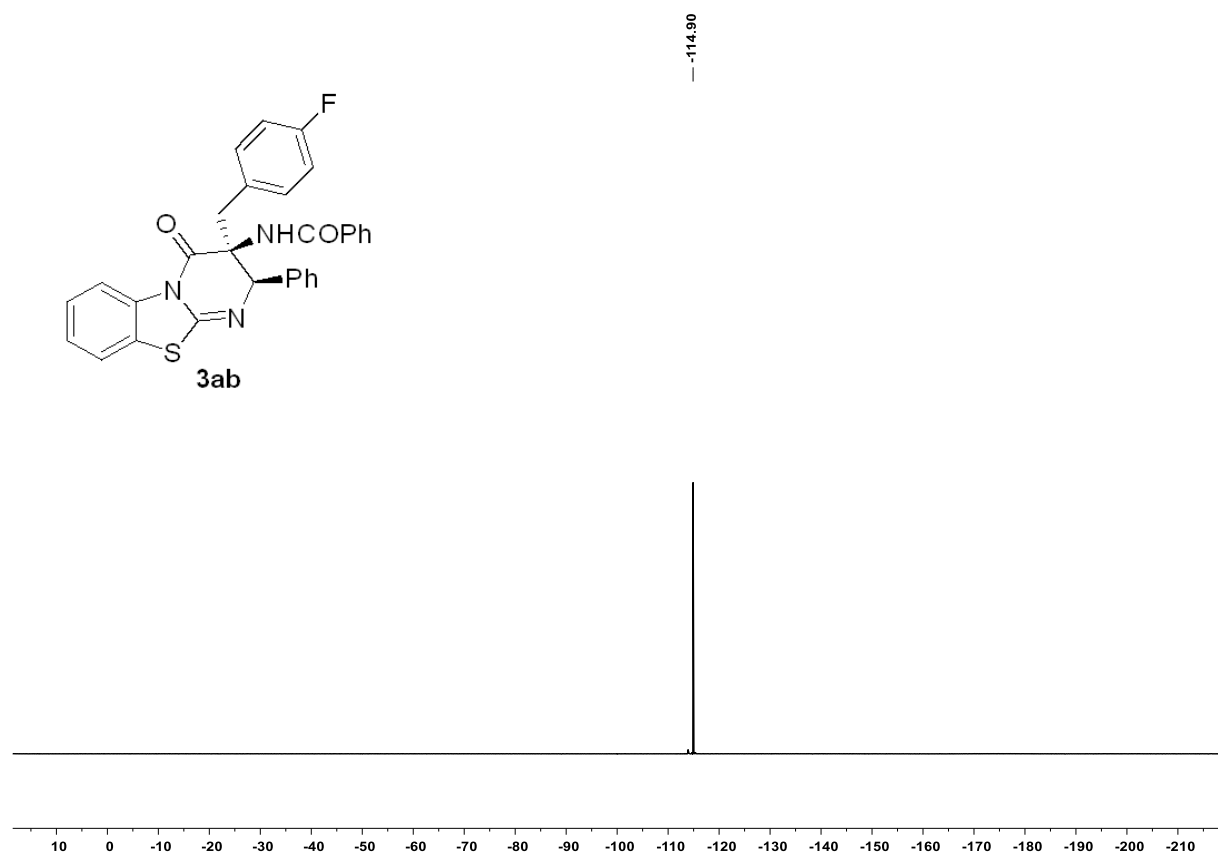

**Figure S57. <sup>1</sup>H NMR of 3ac**

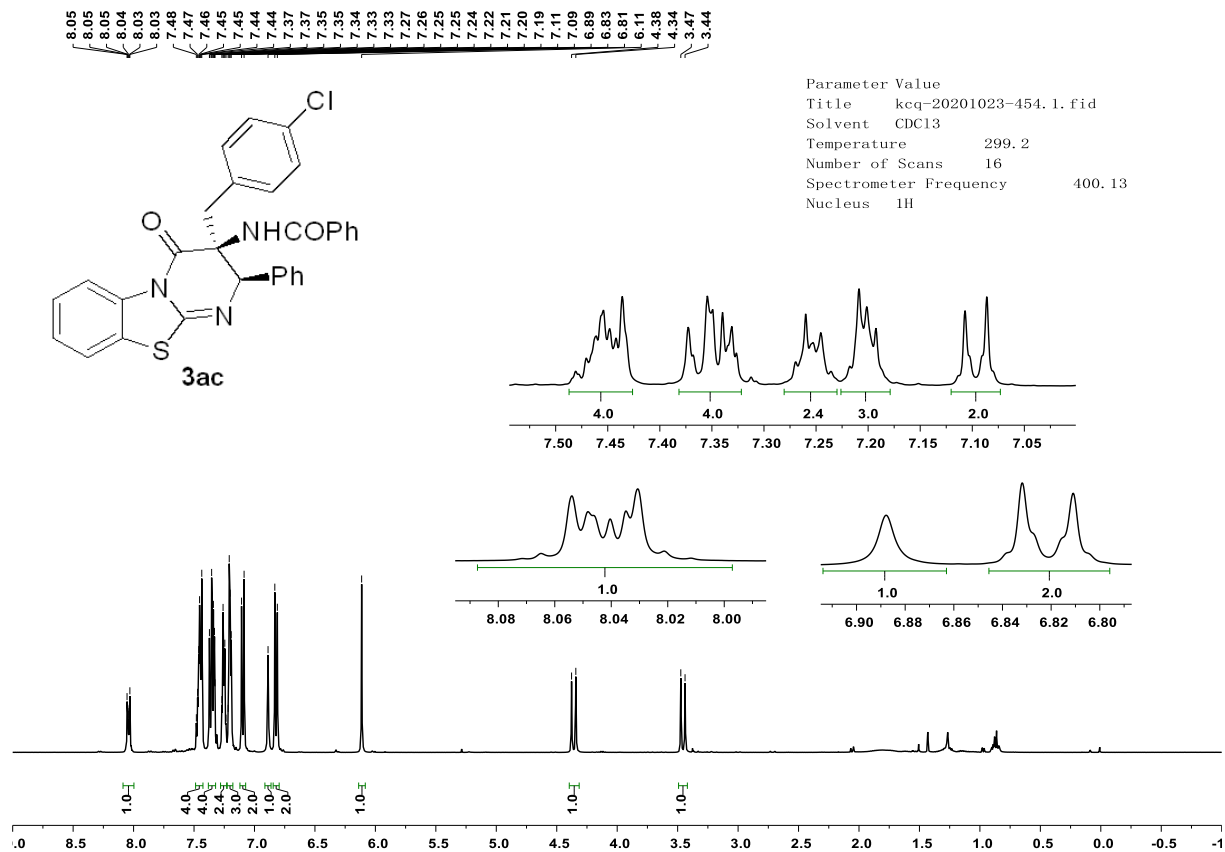

**Figure S58. <sup>13</sup>C NMR of 3ac**

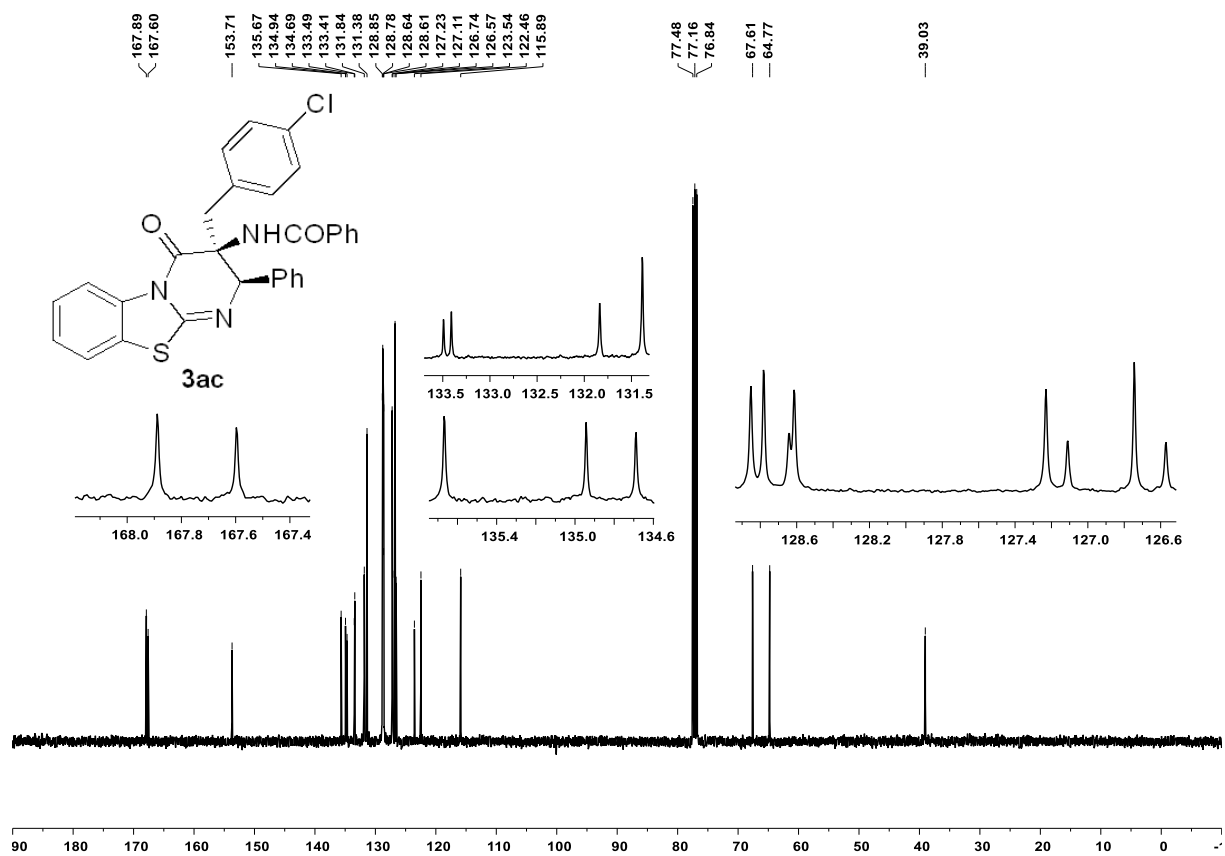

Figure S59. <sup>1</sup>H NMR of 3ad

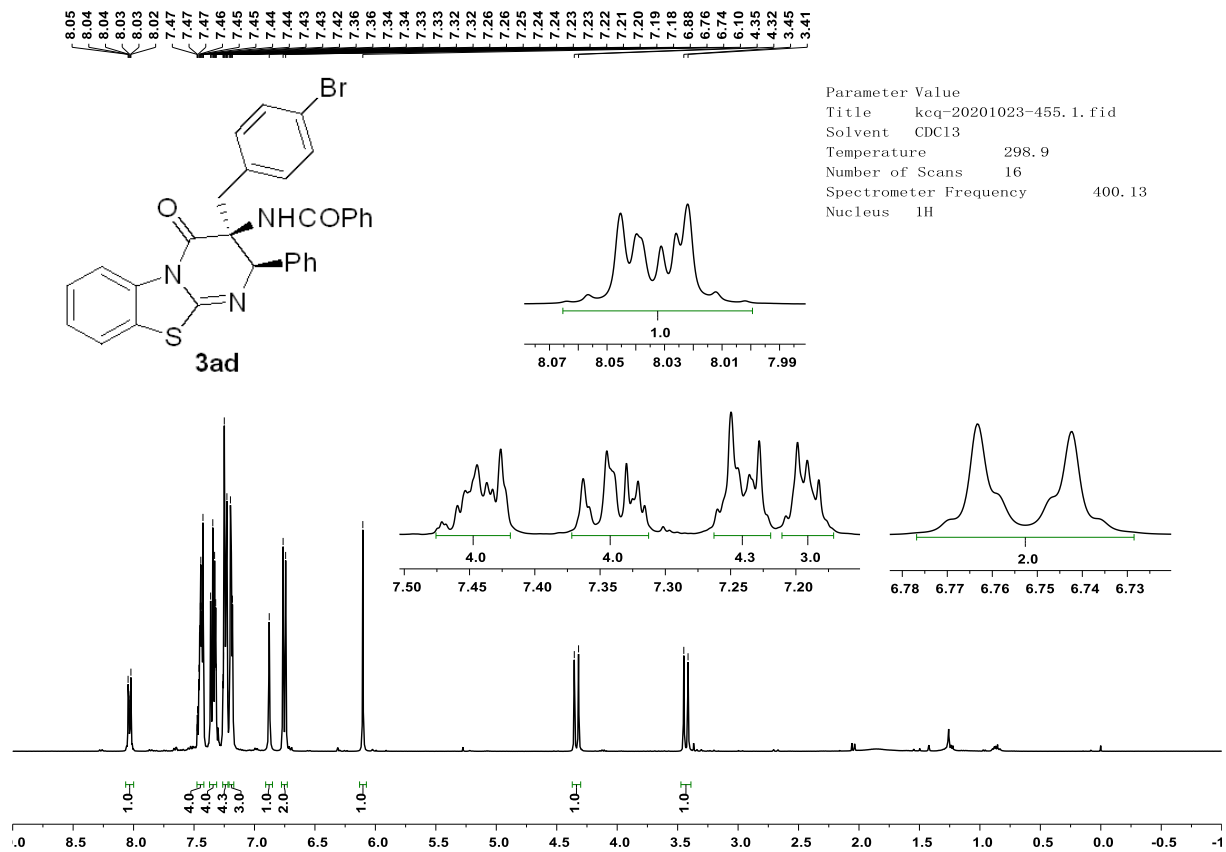

Figure S60. <sup>13</sup>C NMR of 3ad

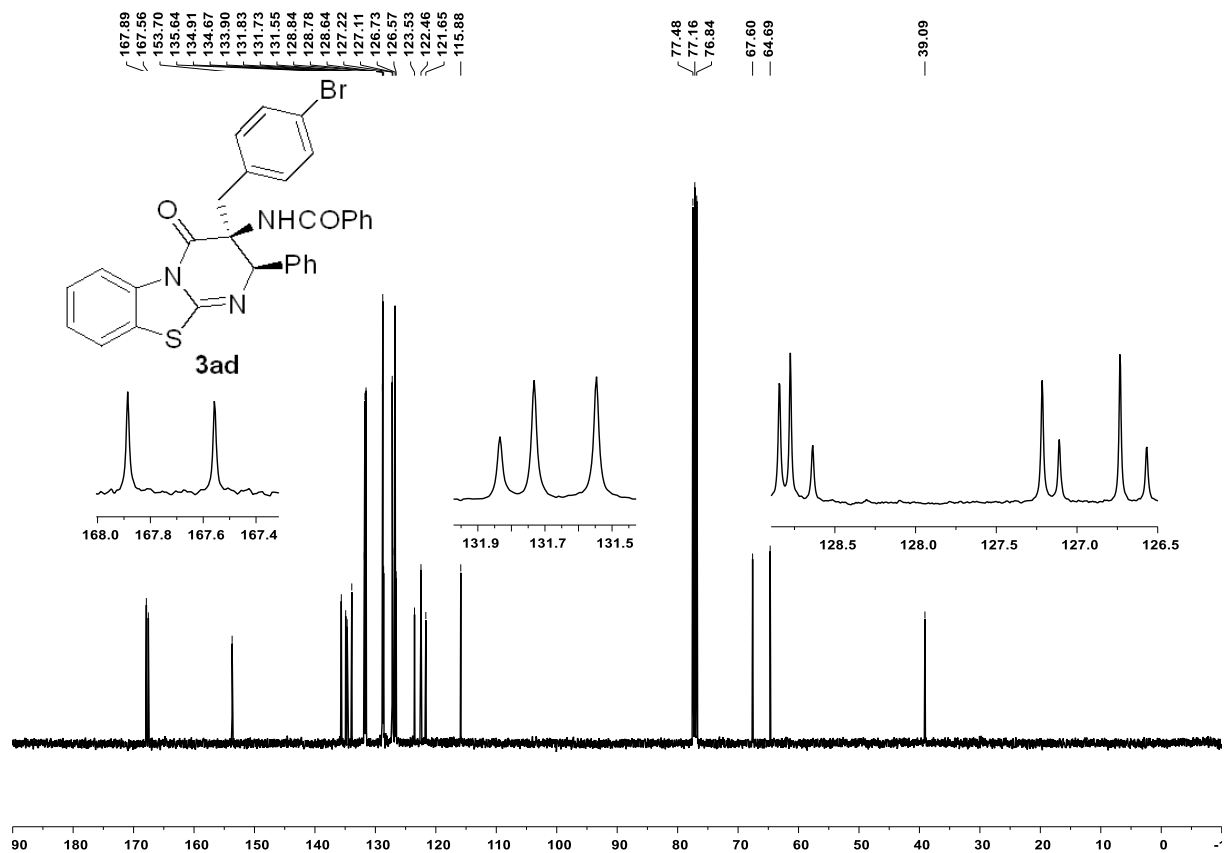

Figure S61. <sup>1</sup>H NMR of 3ae

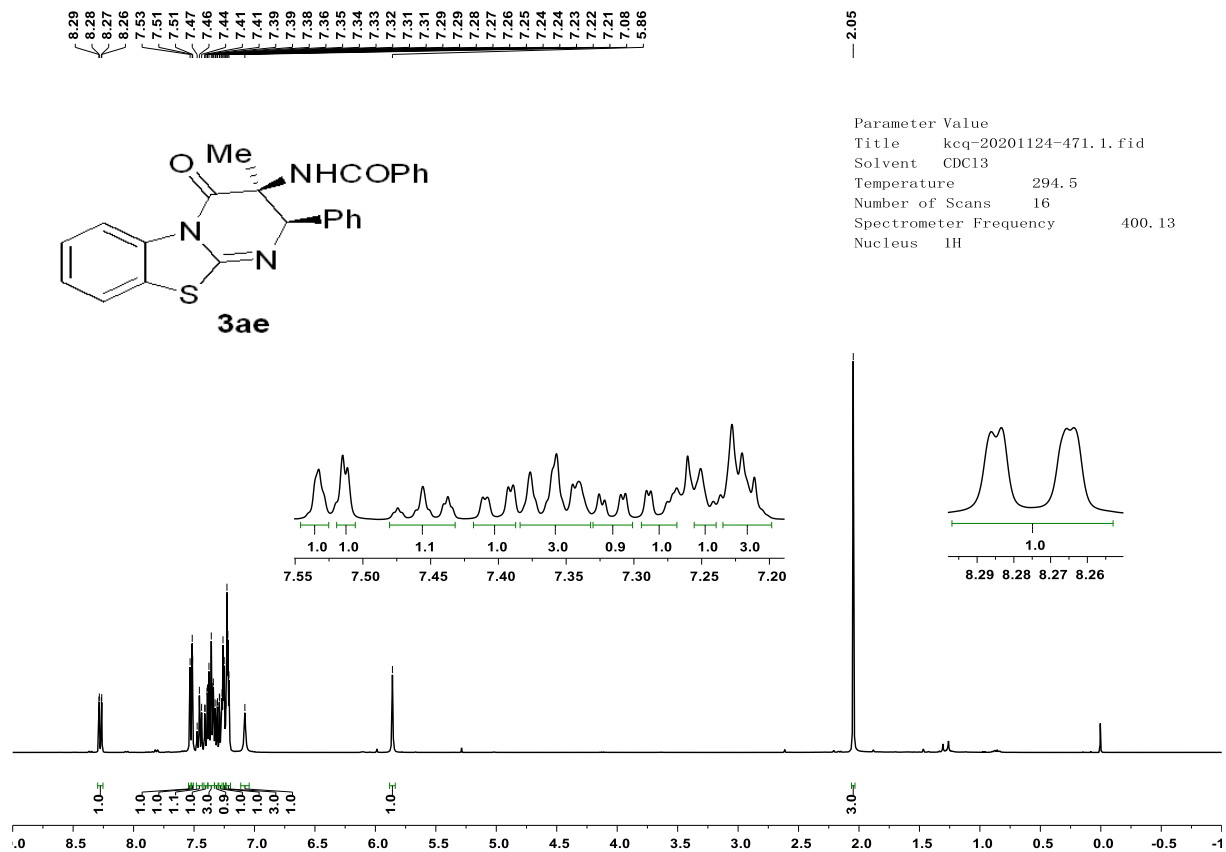

Figure S62. <sup>13</sup>C NMR of 3ae

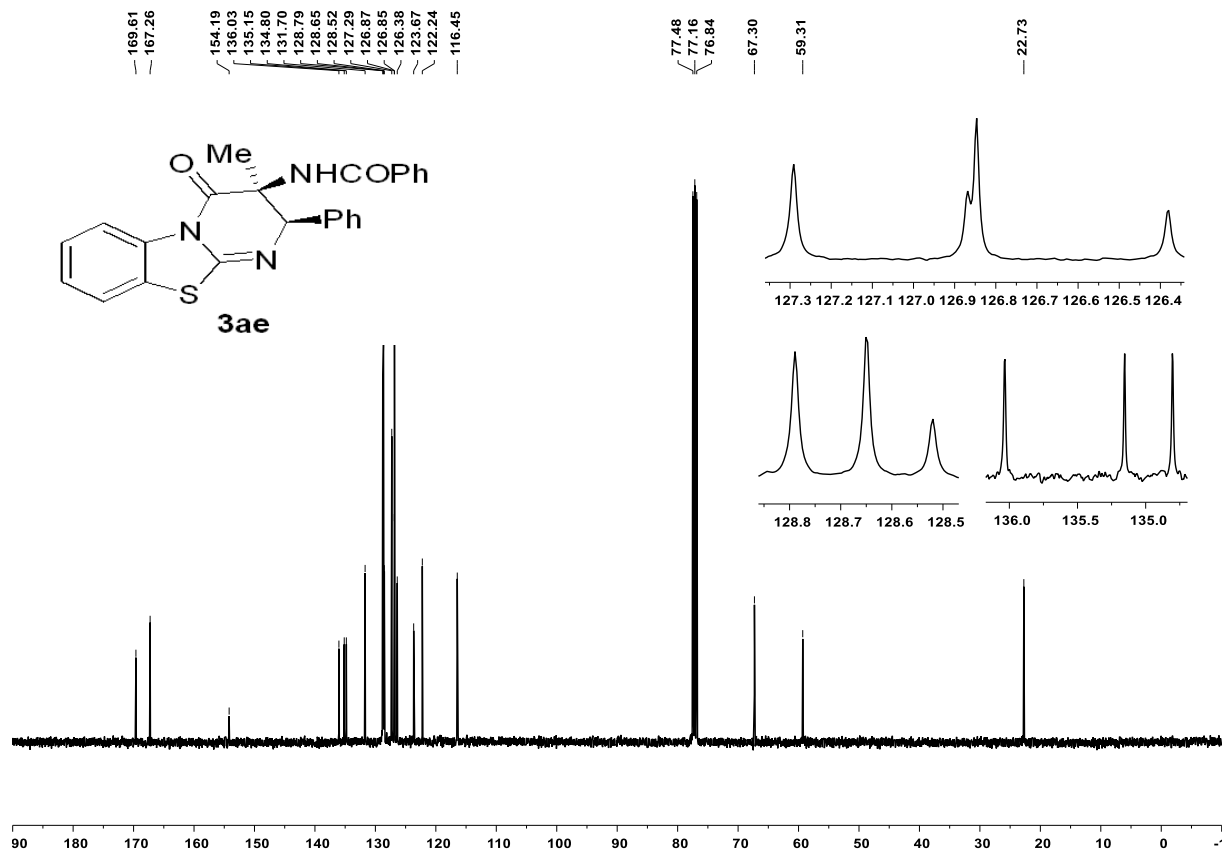

Figure S63. <sup>1</sup>H NMR of 3af

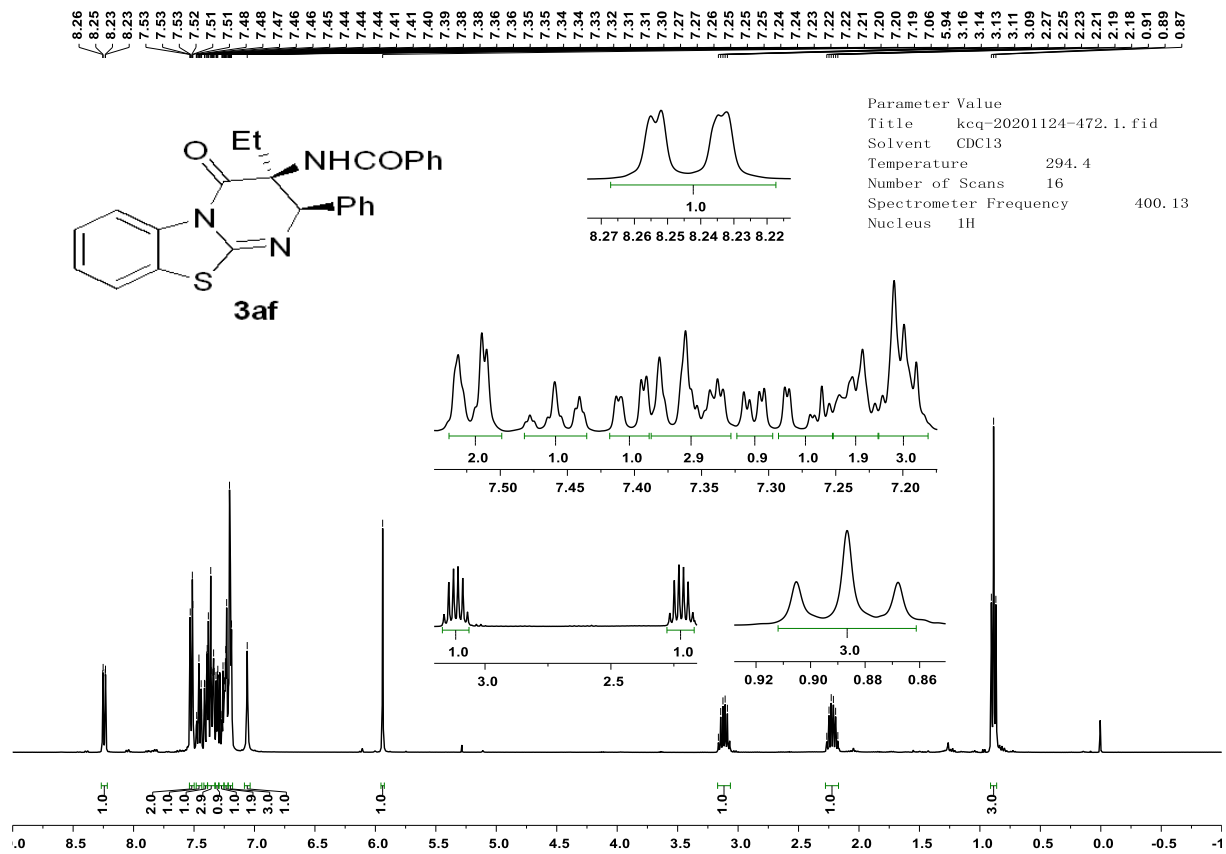

Figure S64. <sup>13</sup>C NMR of 3af

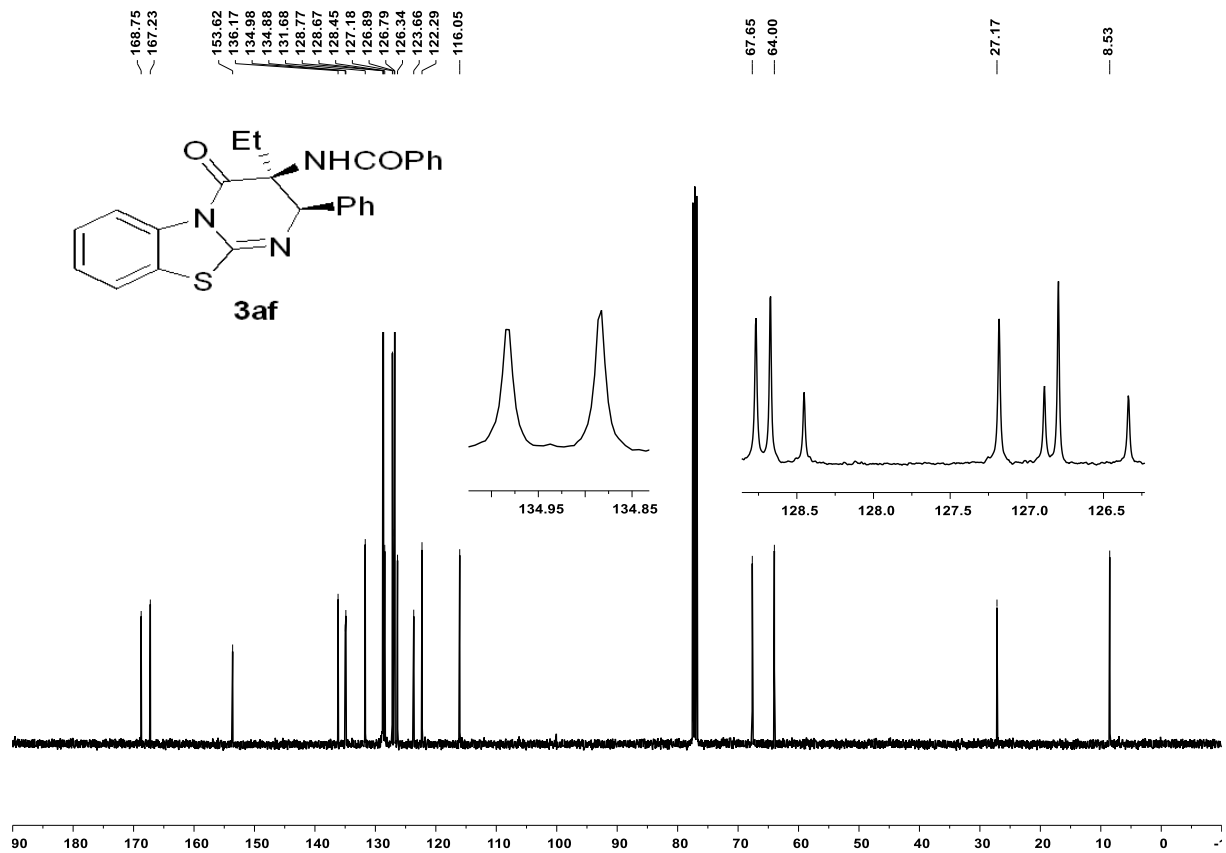

Figure S65. <sup>1</sup>H NMR of 3ag

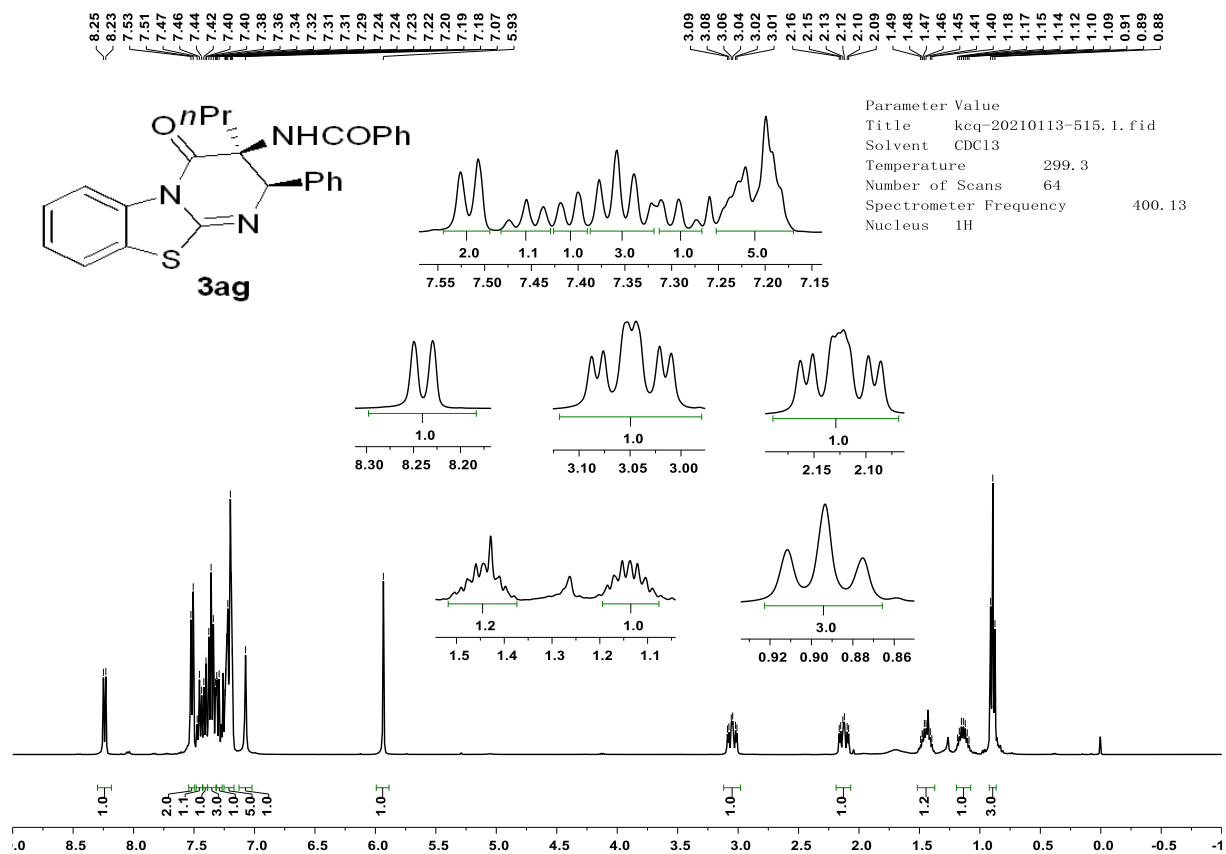

Figure S66. <sup>13</sup>C NMR of 3ag

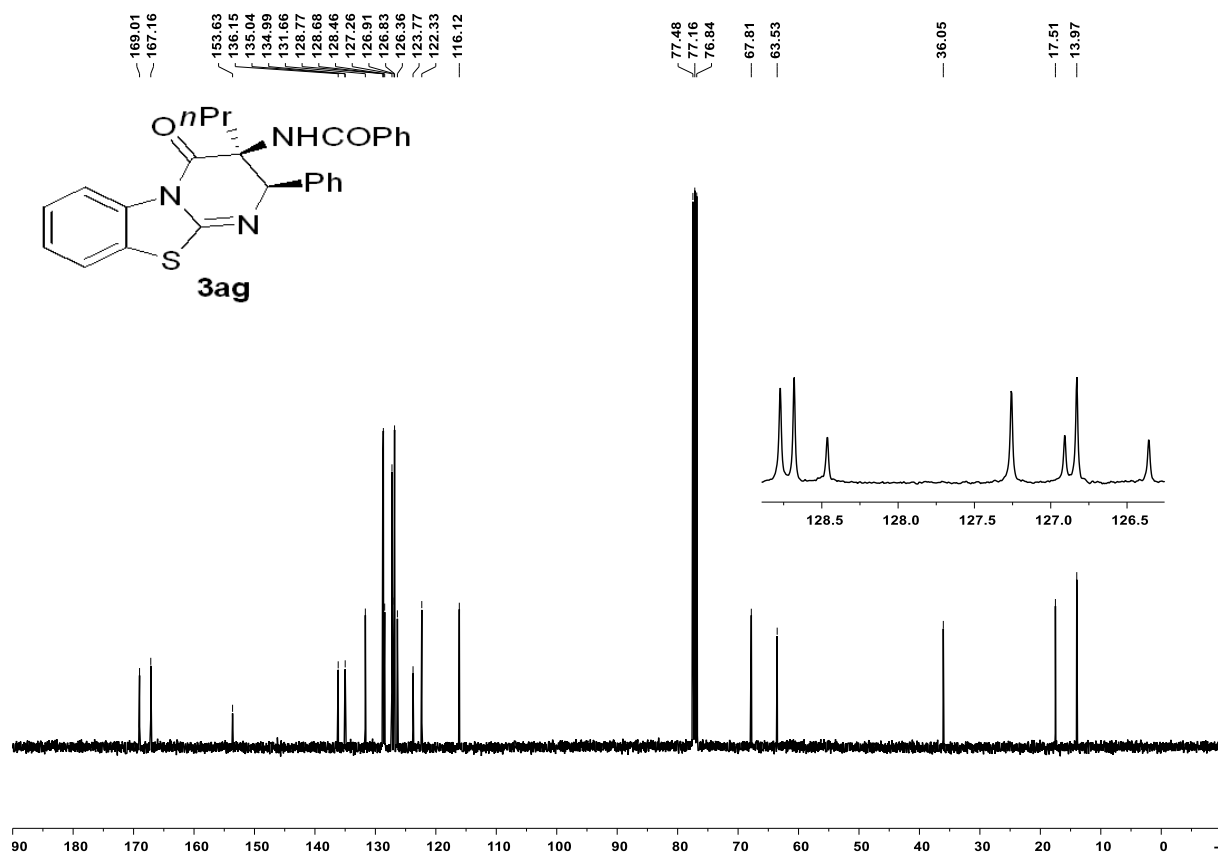

Figure S67. <sup>1</sup>H NMR of 3ah

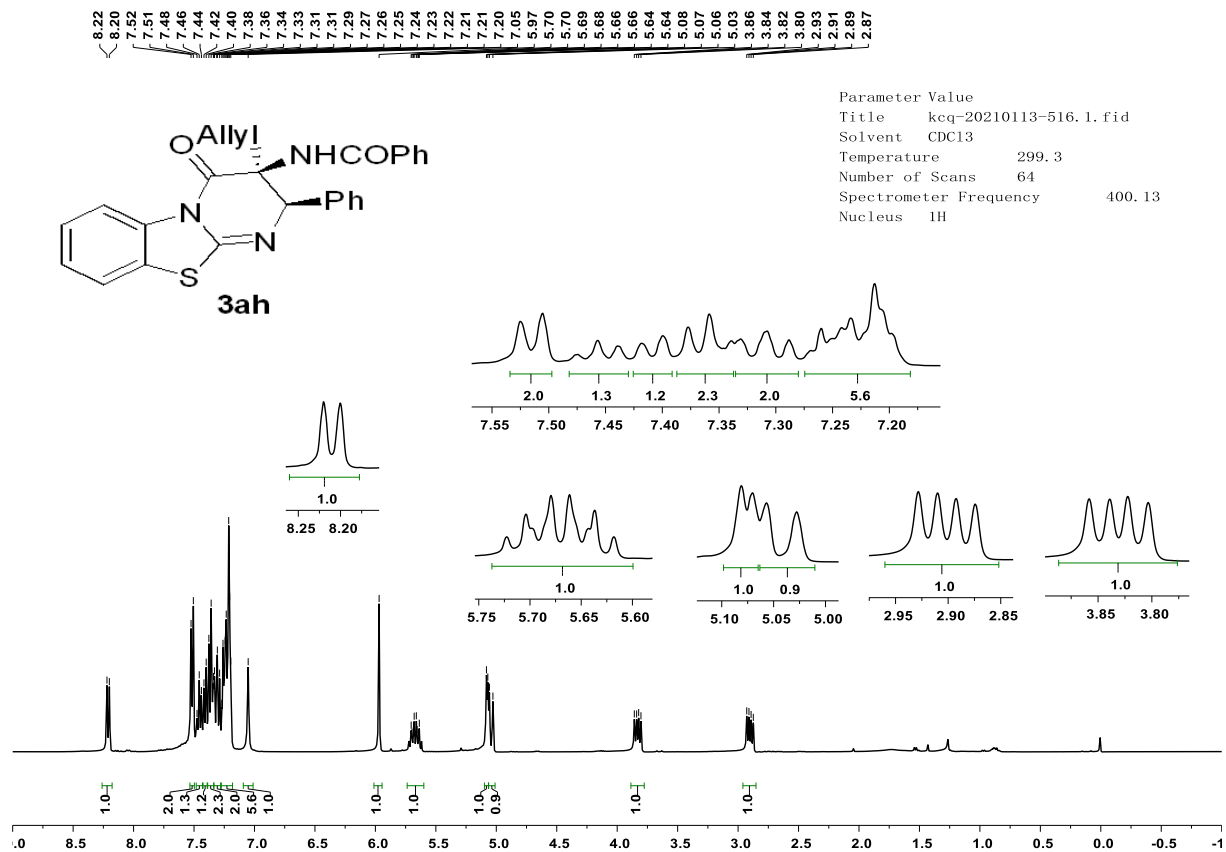

Figure S68. <sup>13</sup>C NMR of 3ah

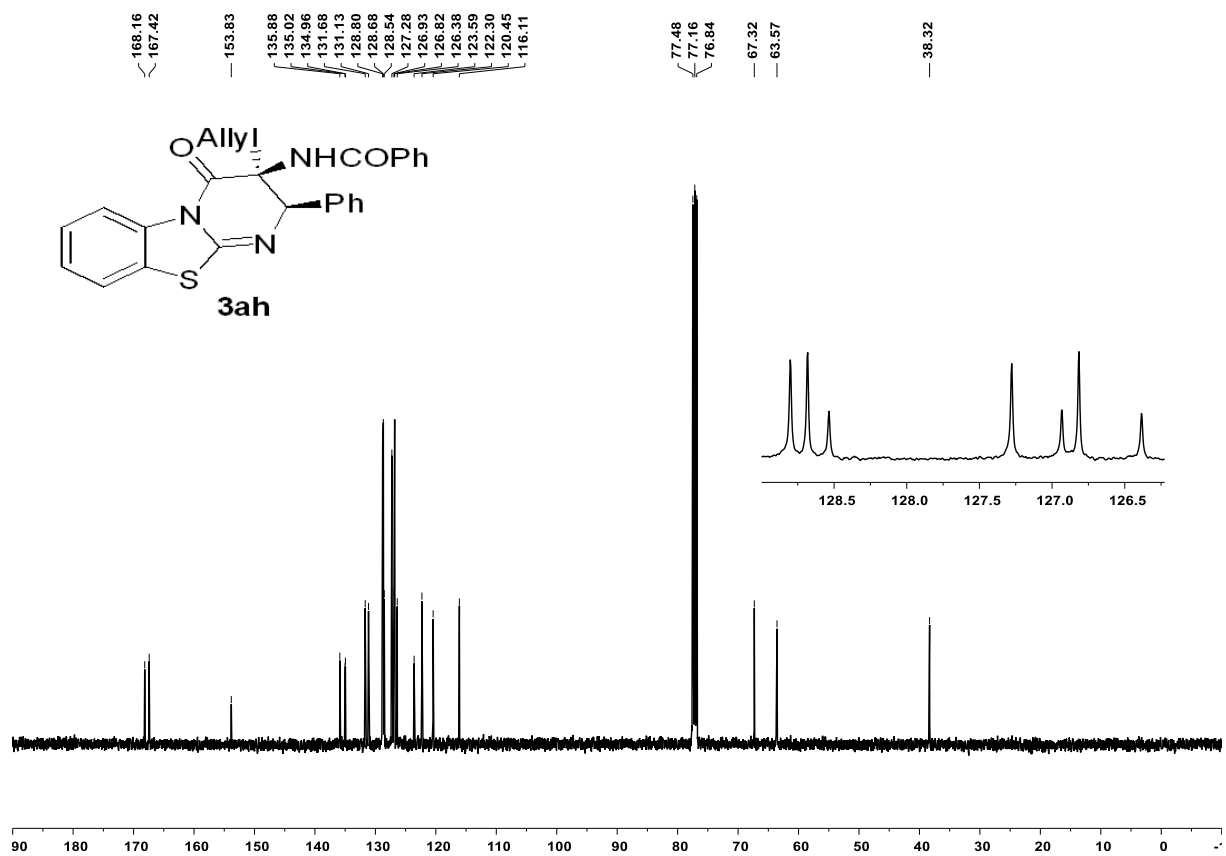

Figure S69. <sup>1</sup>H NMR of 3ai

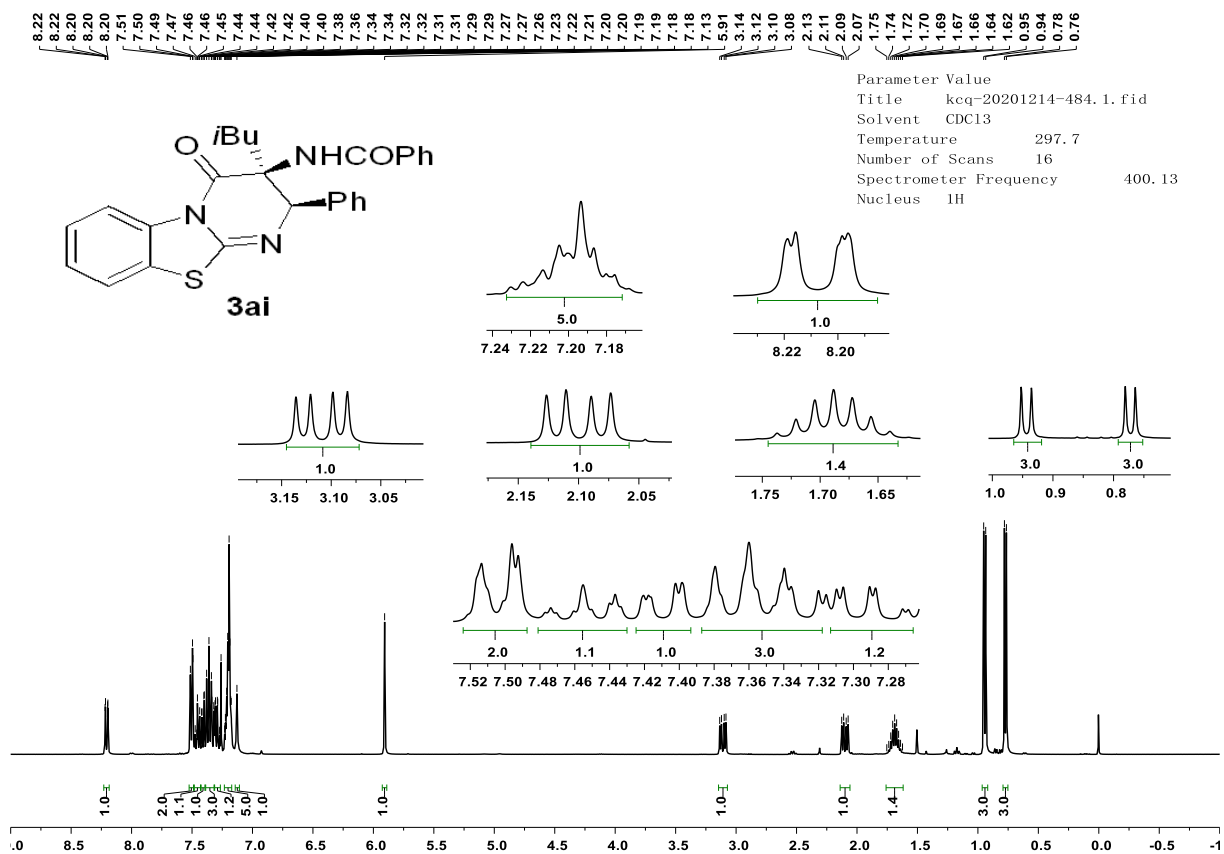

Figure S70. <sup>13</sup>C NMR of 3ai

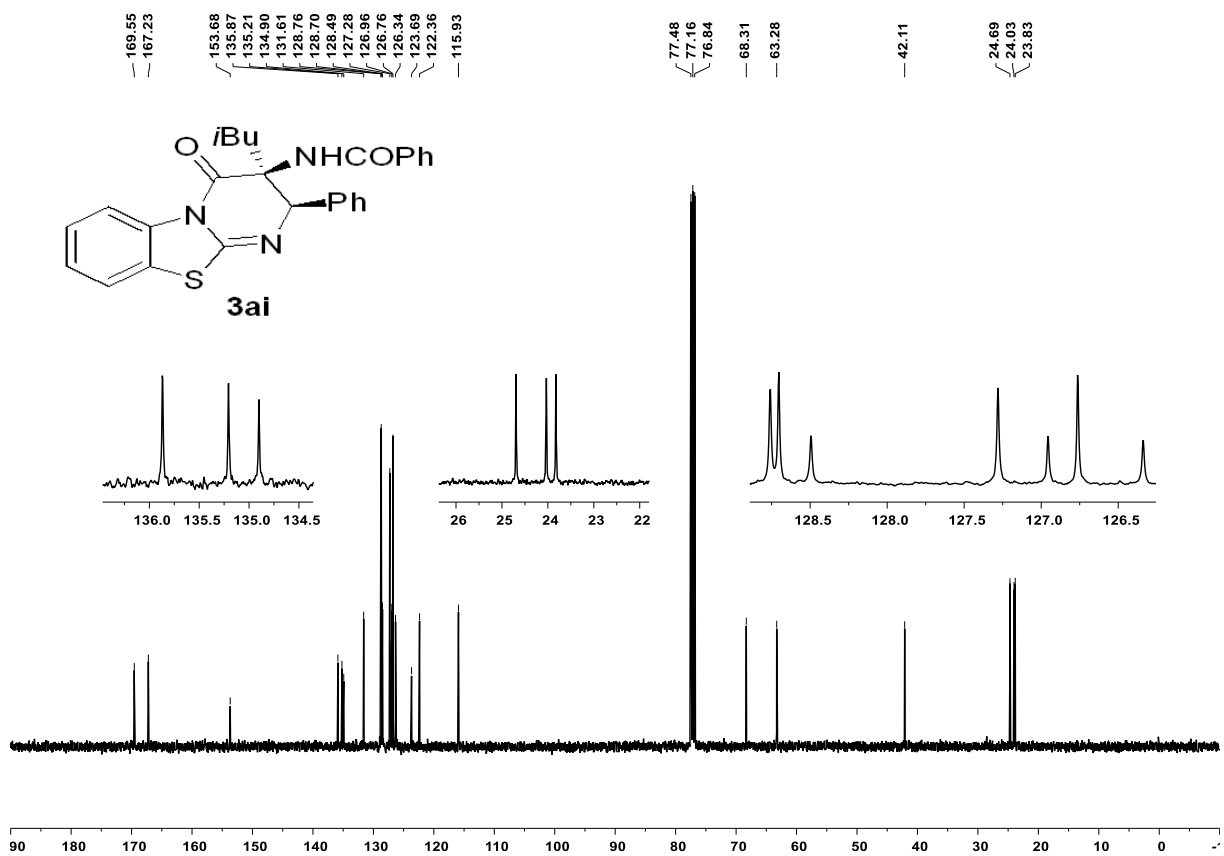



Figure S71. <sup>1</sup>H NMR of 3aj

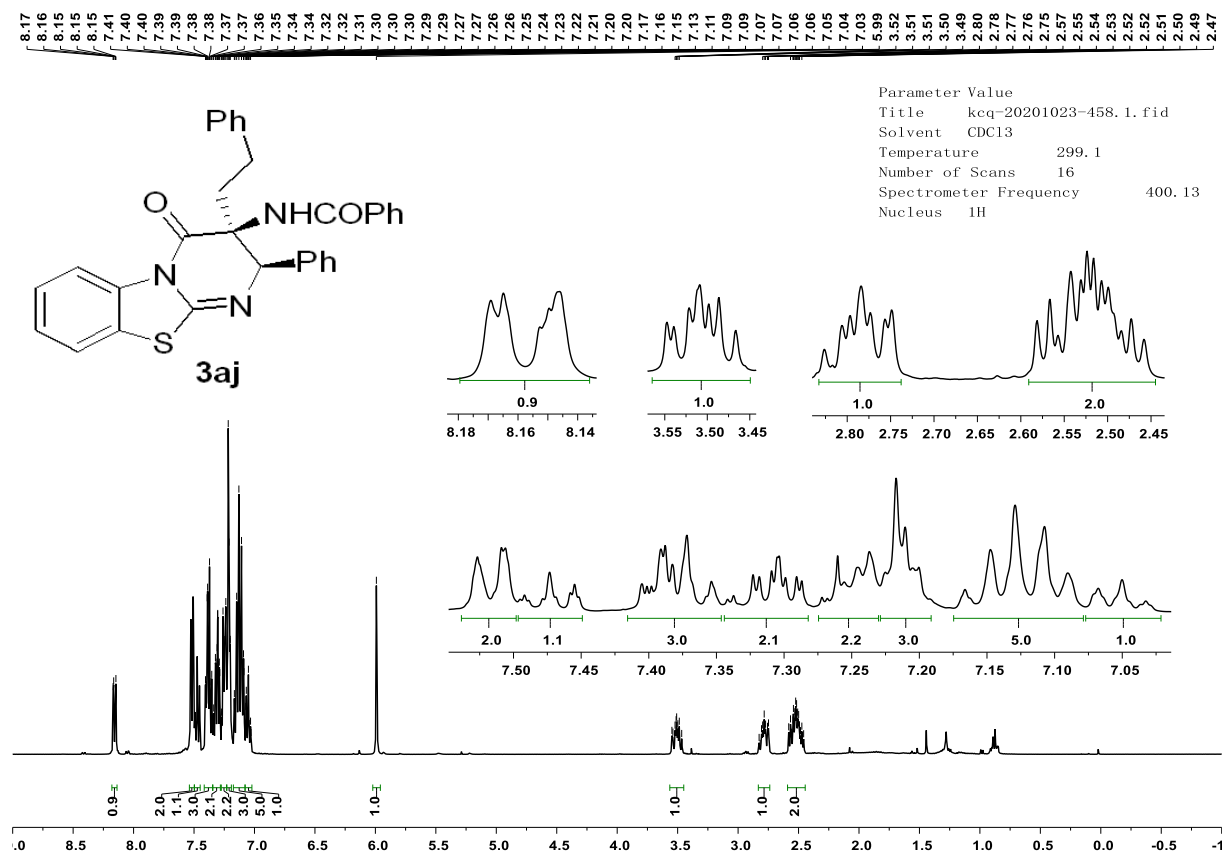

Figure S72. <sup>13</sup>C NMR of 3aj

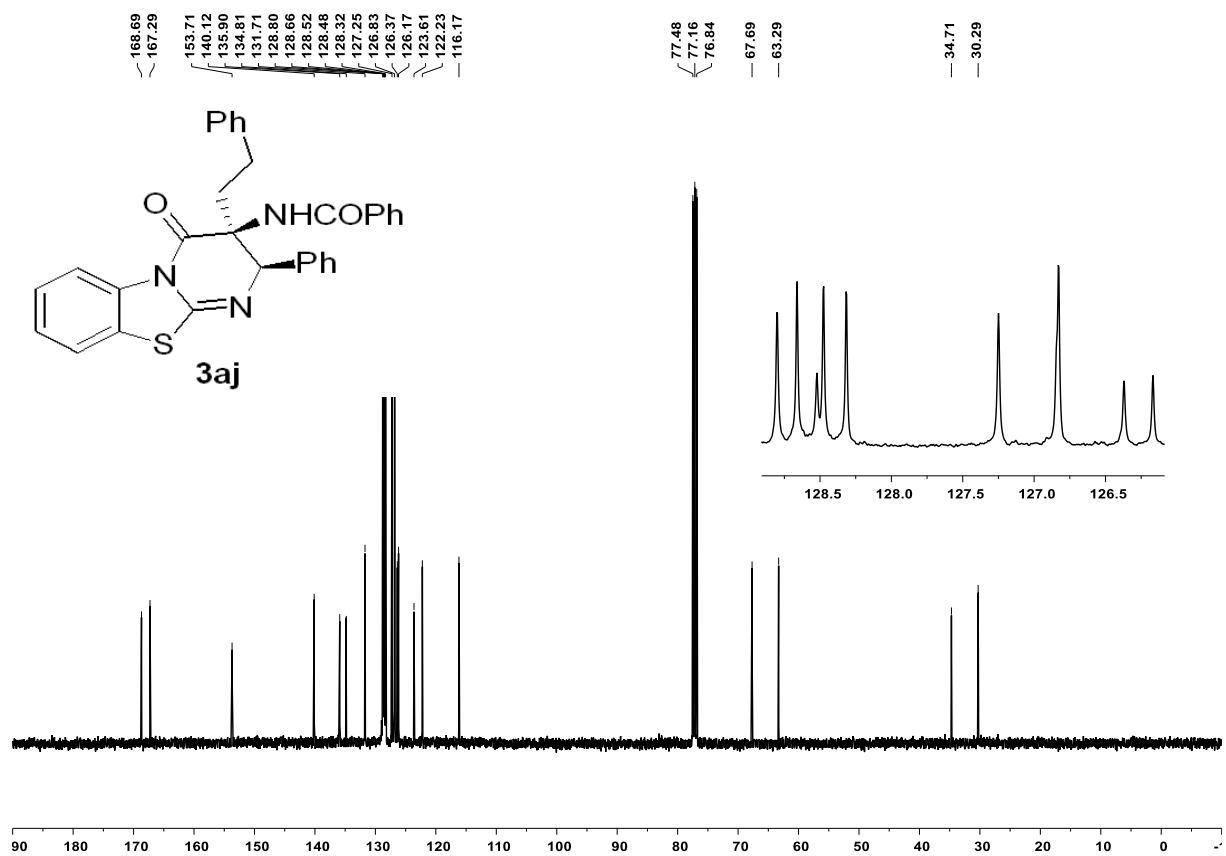

Figure S73. <sup>1</sup>H NMR of 3ak

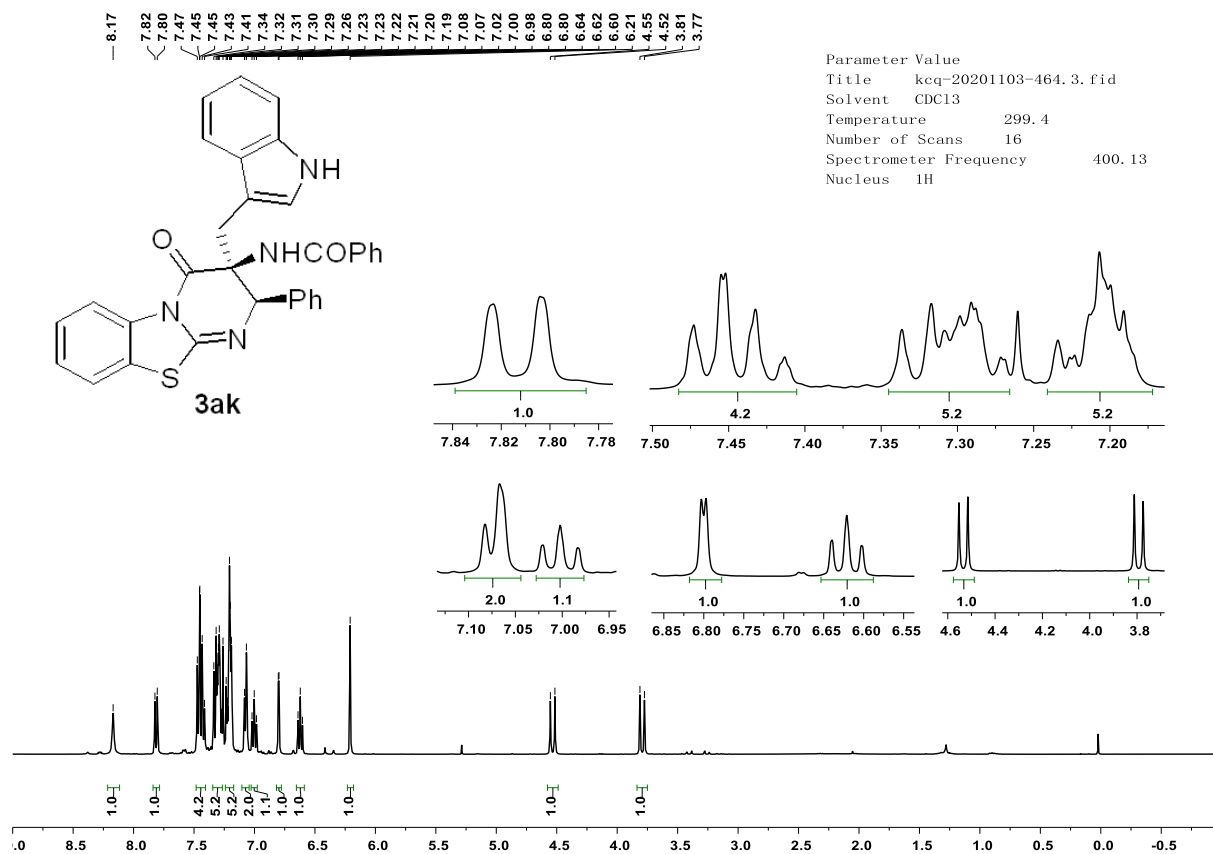

Figure S74. <sup>13</sup>C NMR of 3ak

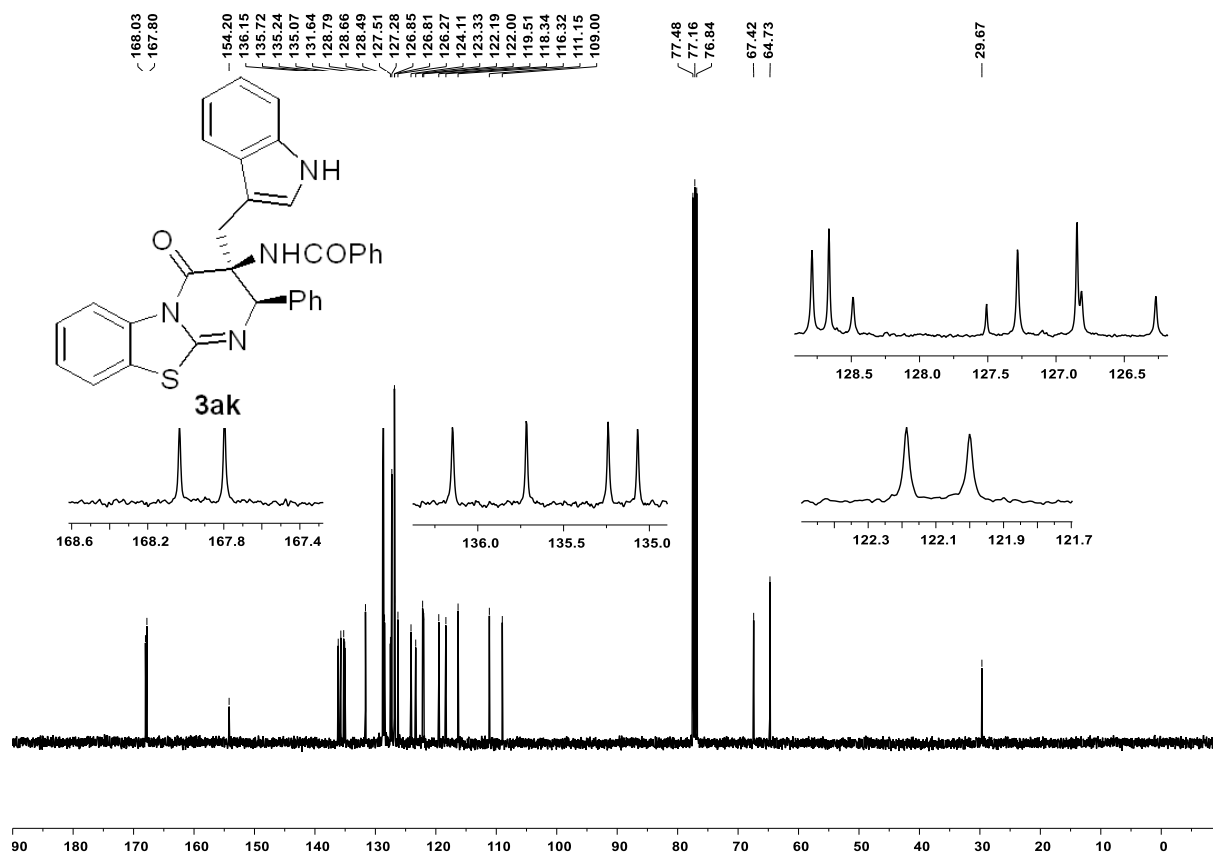

Figure S75. <sup>1</sup>H NMR of 3al

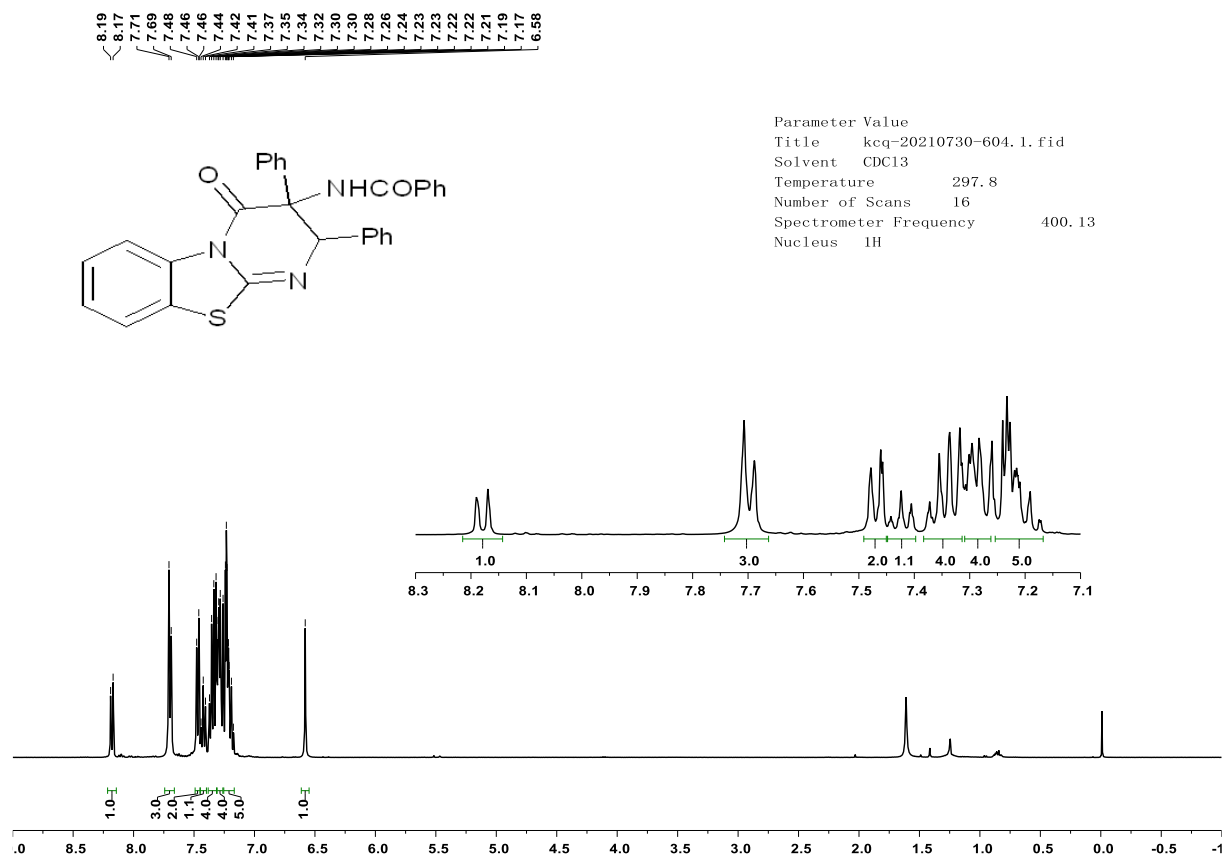

Figure S76. <sup>13</sup>C NMR of 3al

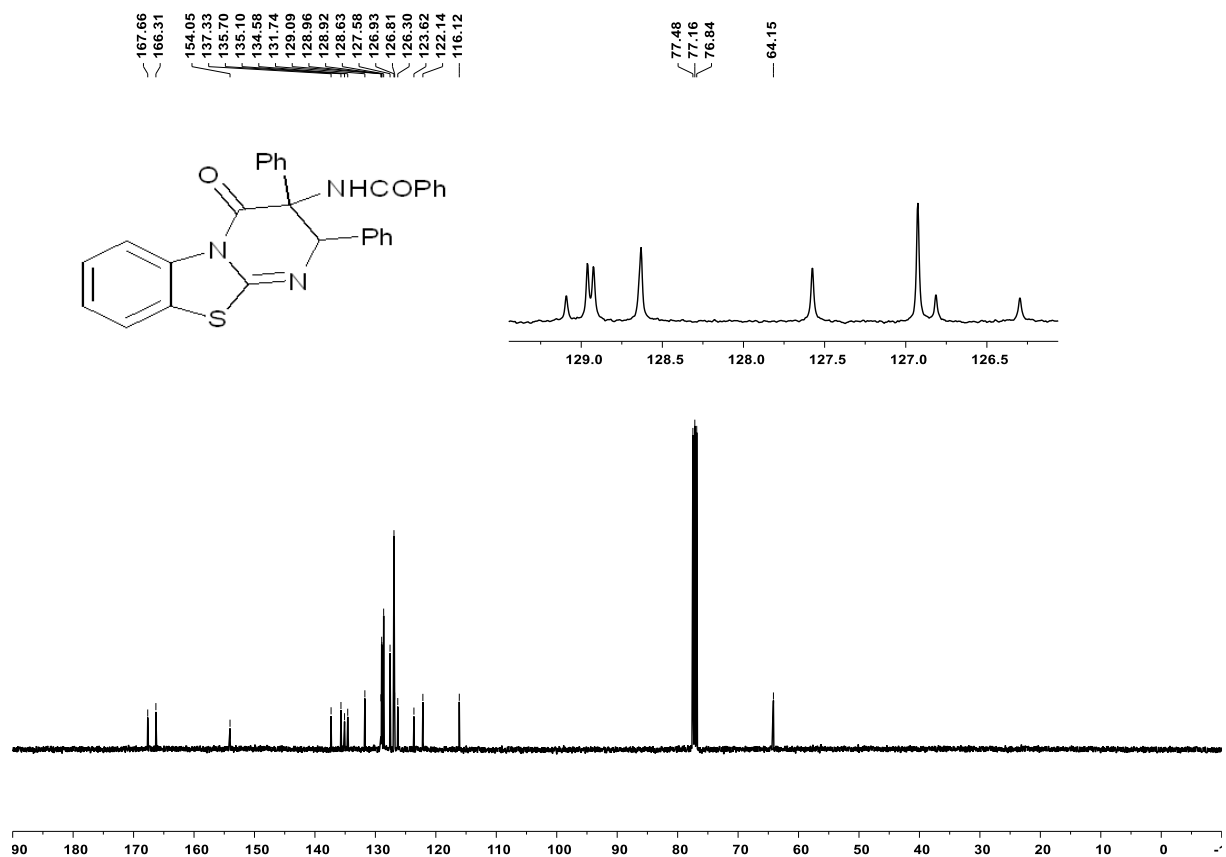

Figure S77. <sup>1</sup>H NMR of 4aa

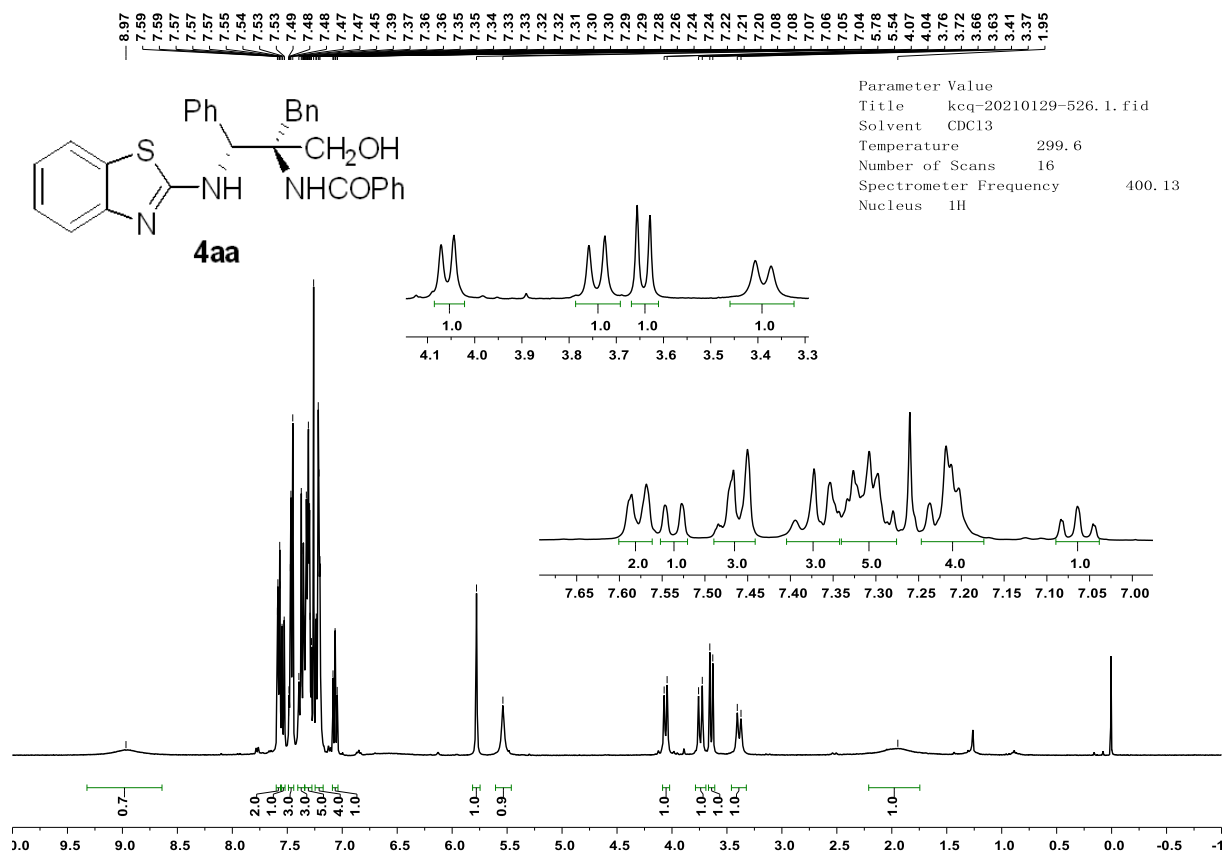

Figure S78. <sup>13</sup>C NMR of 4aa

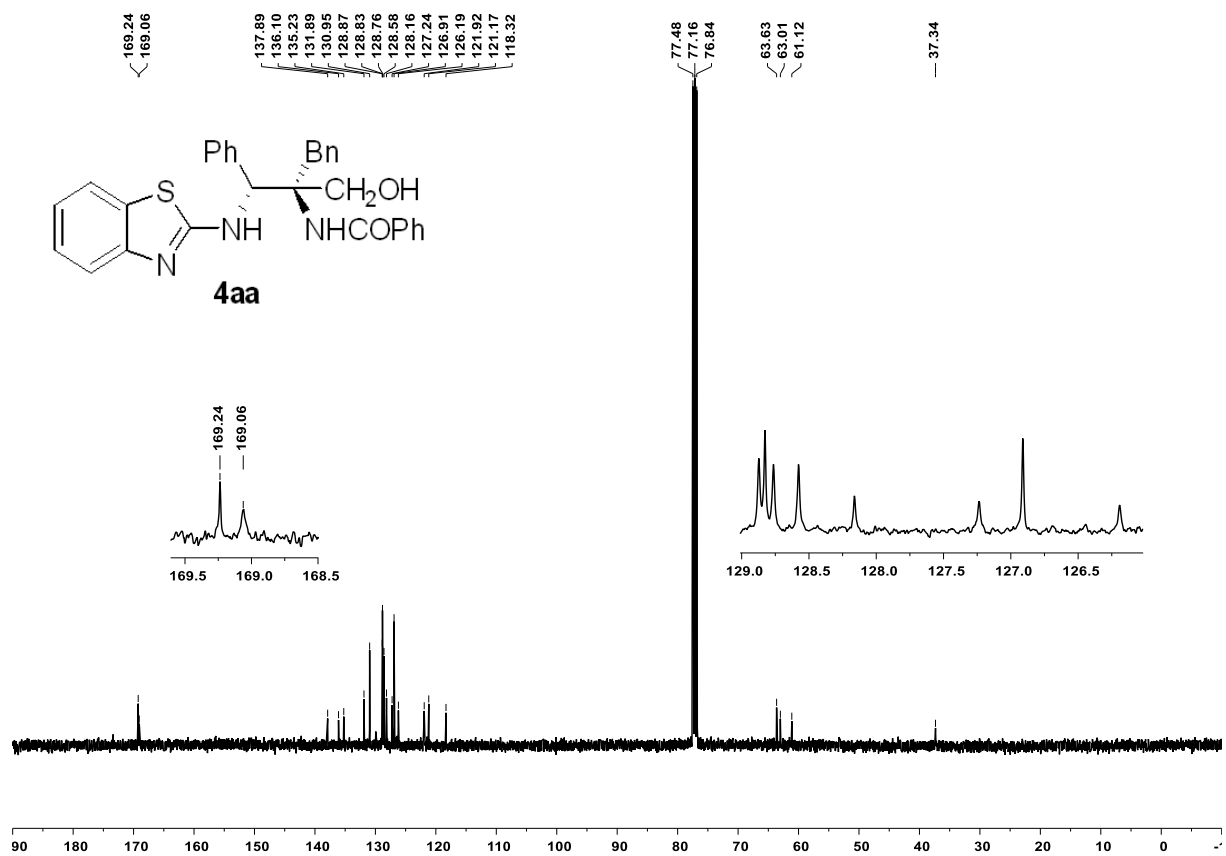

Figure S79. <sup>1</sup>H NMR of 5aa

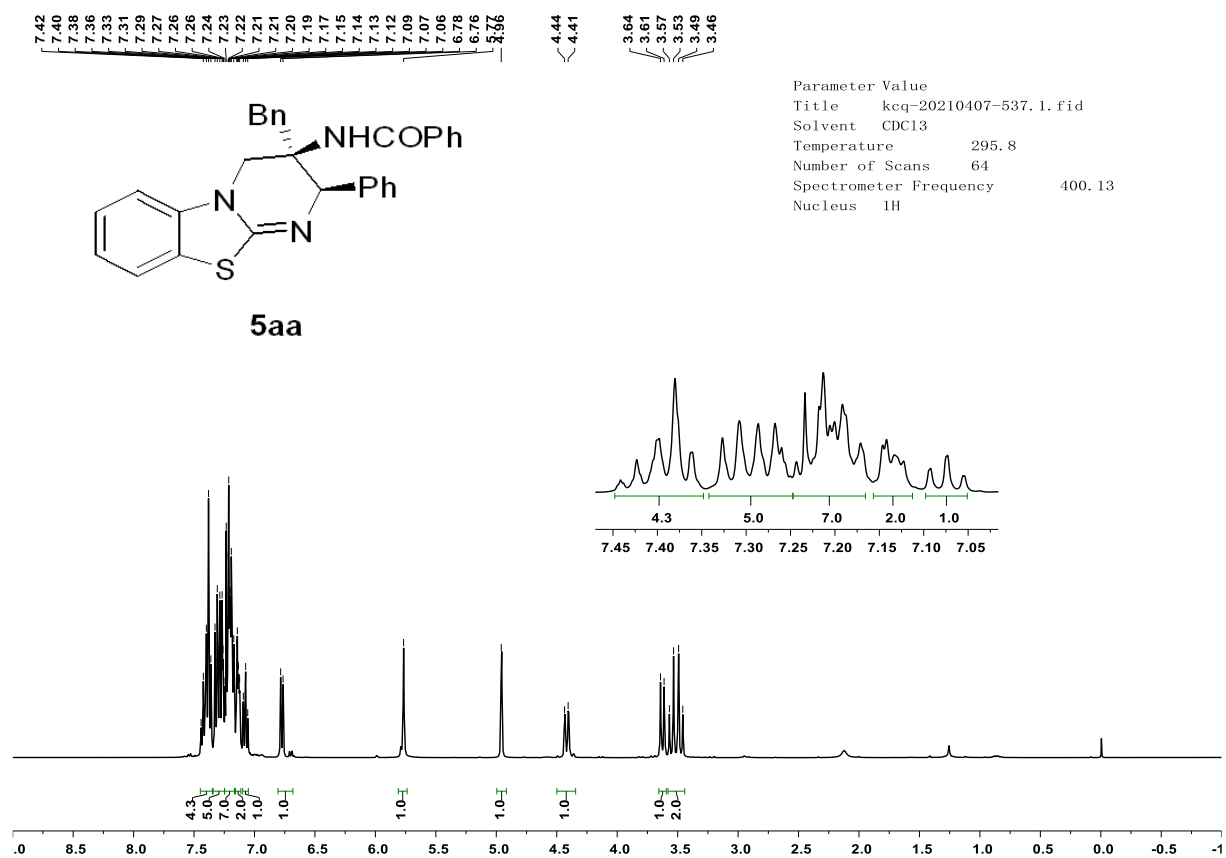

Figure S80. <sup>13</sup>C NMR of 5aa

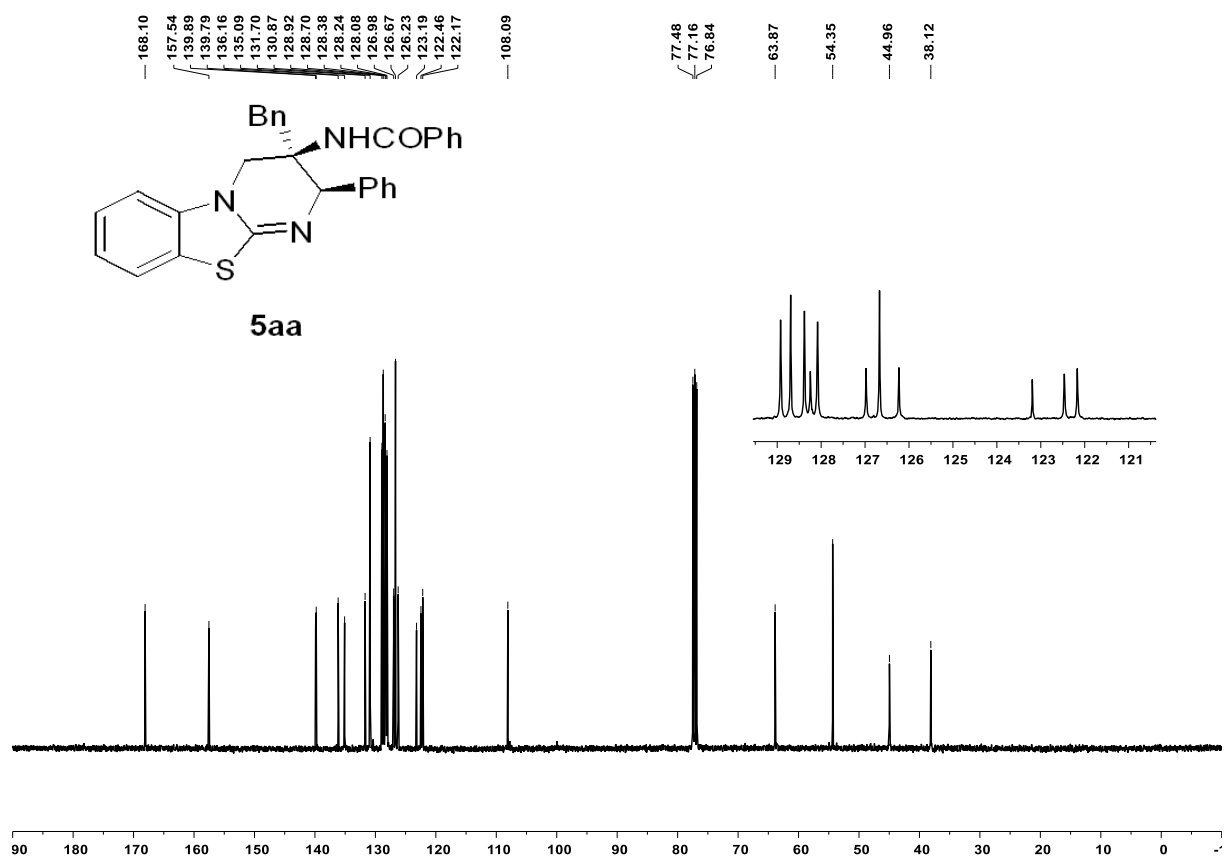

Figure S81. <sup>1</sup>H NMR of 7a

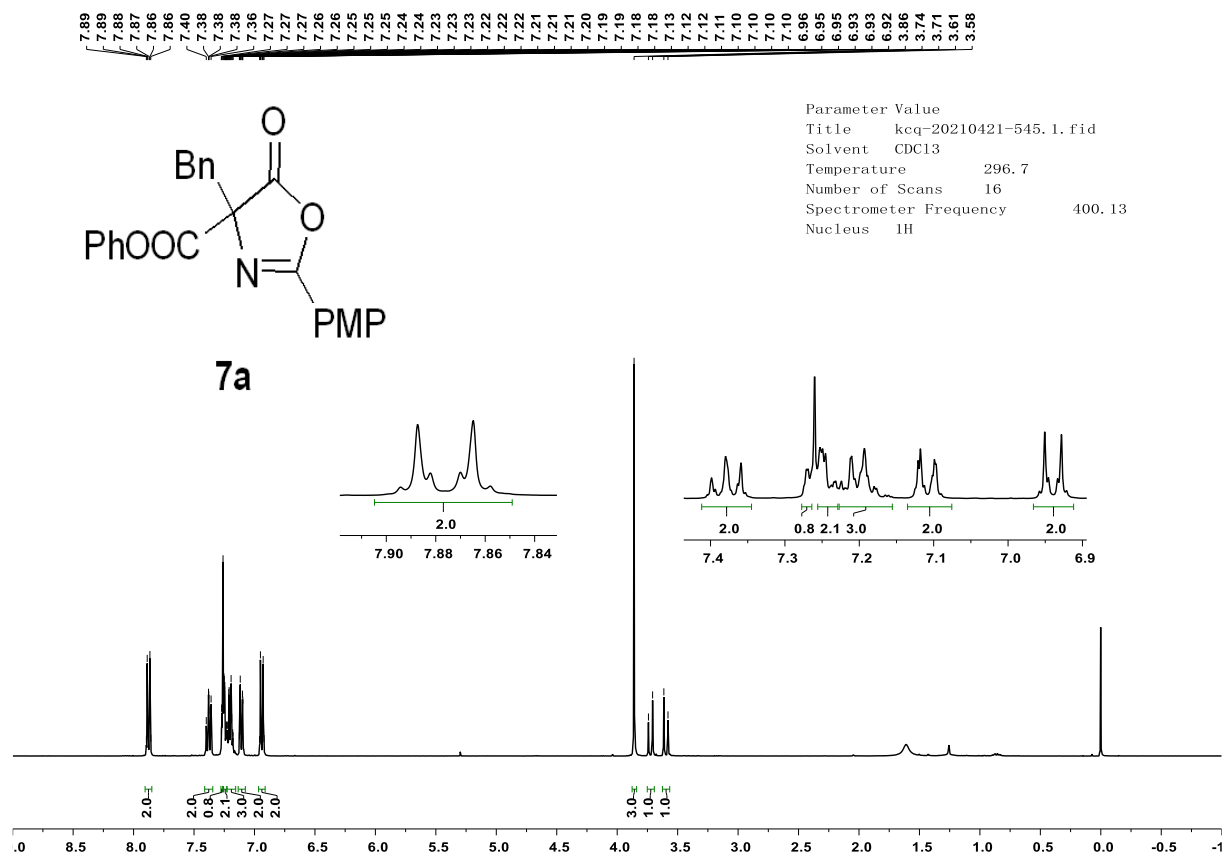

Figure S82. <sup>13</sup>C NMR of 7a

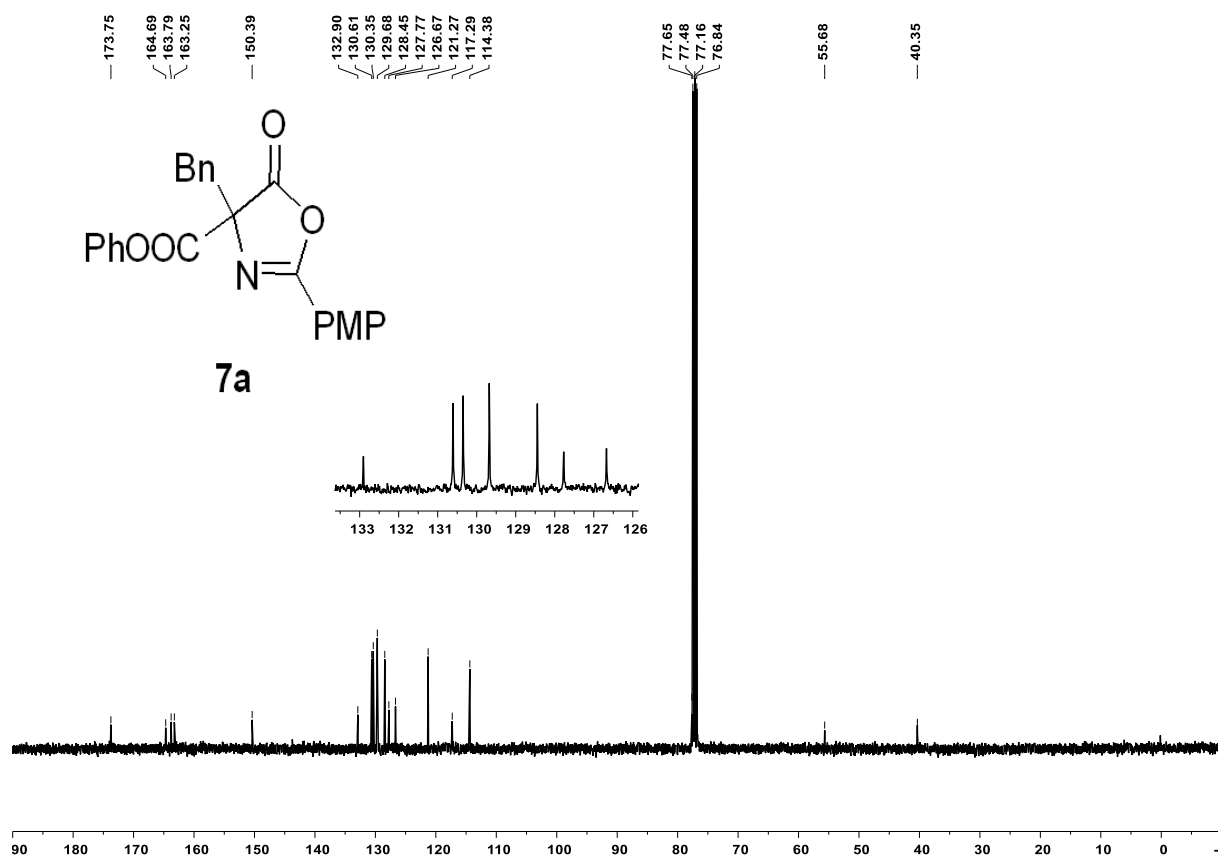

## 10. Copies of CD spectra for products

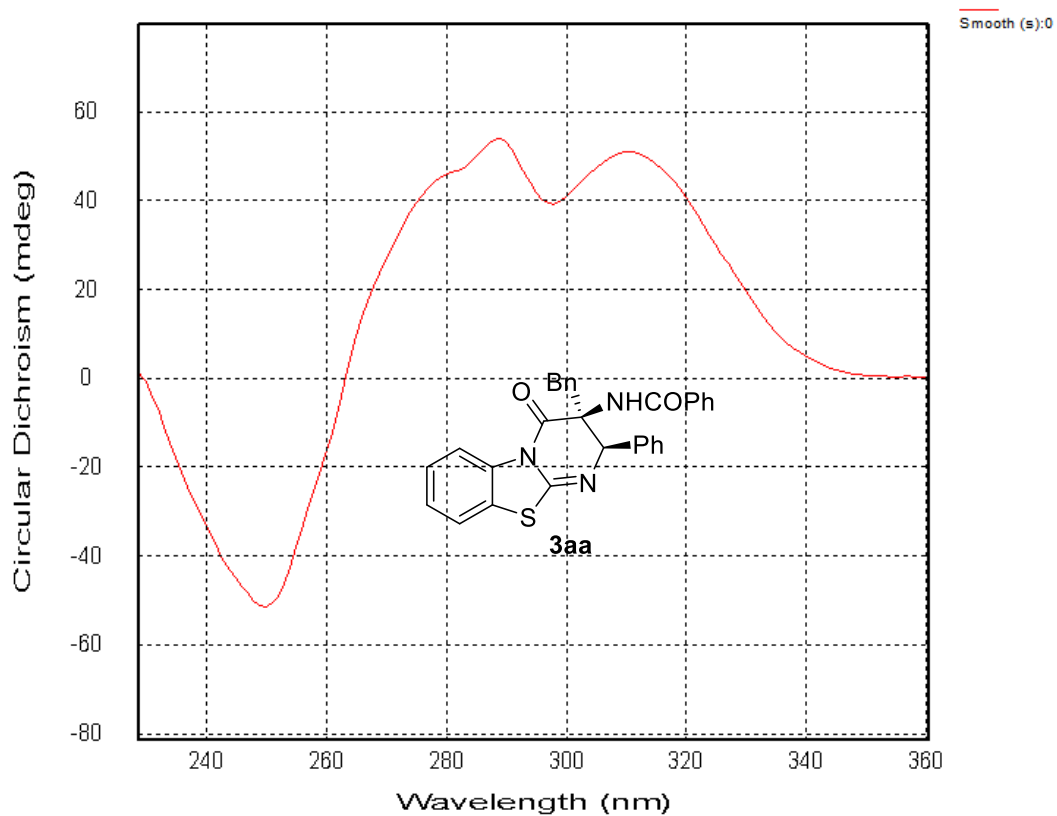

Figure S83.

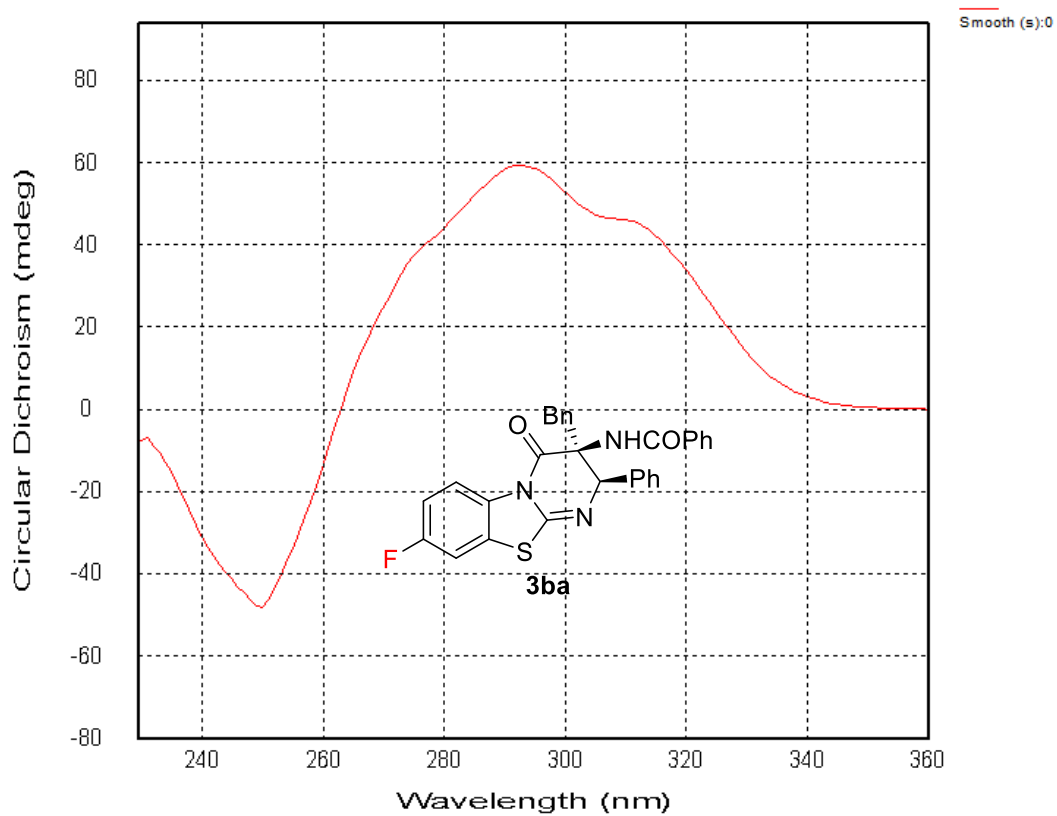

Figure S84.

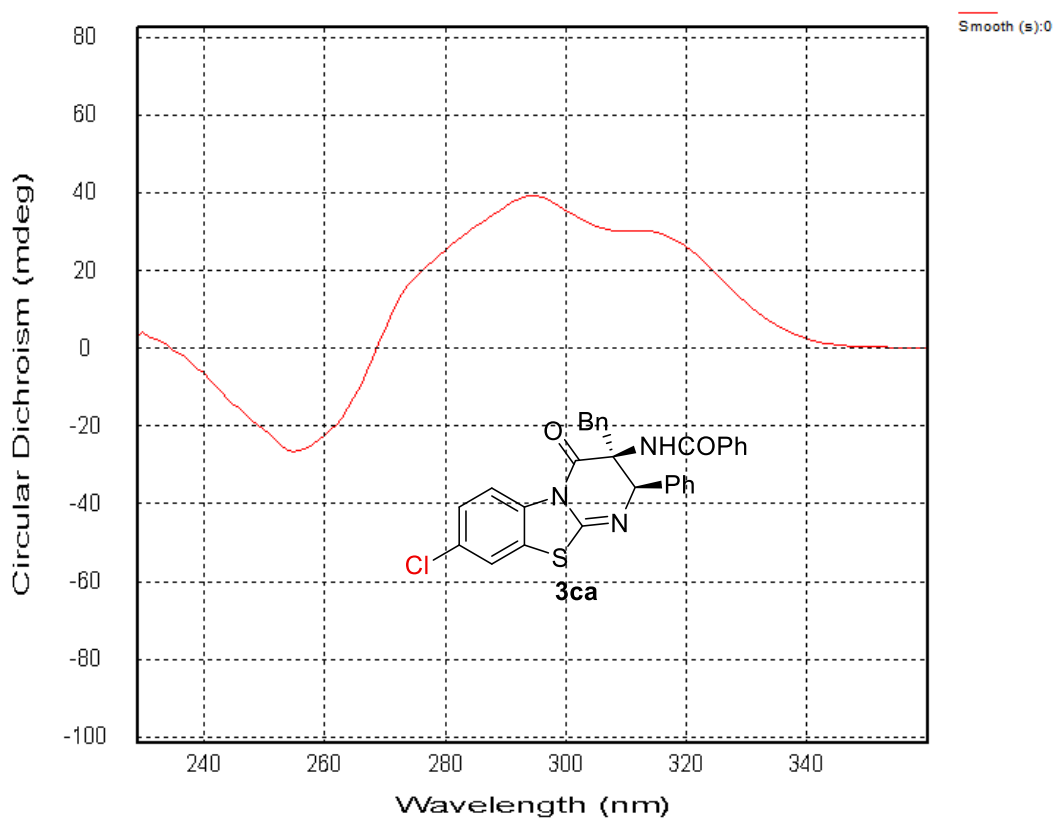

Figure S85.

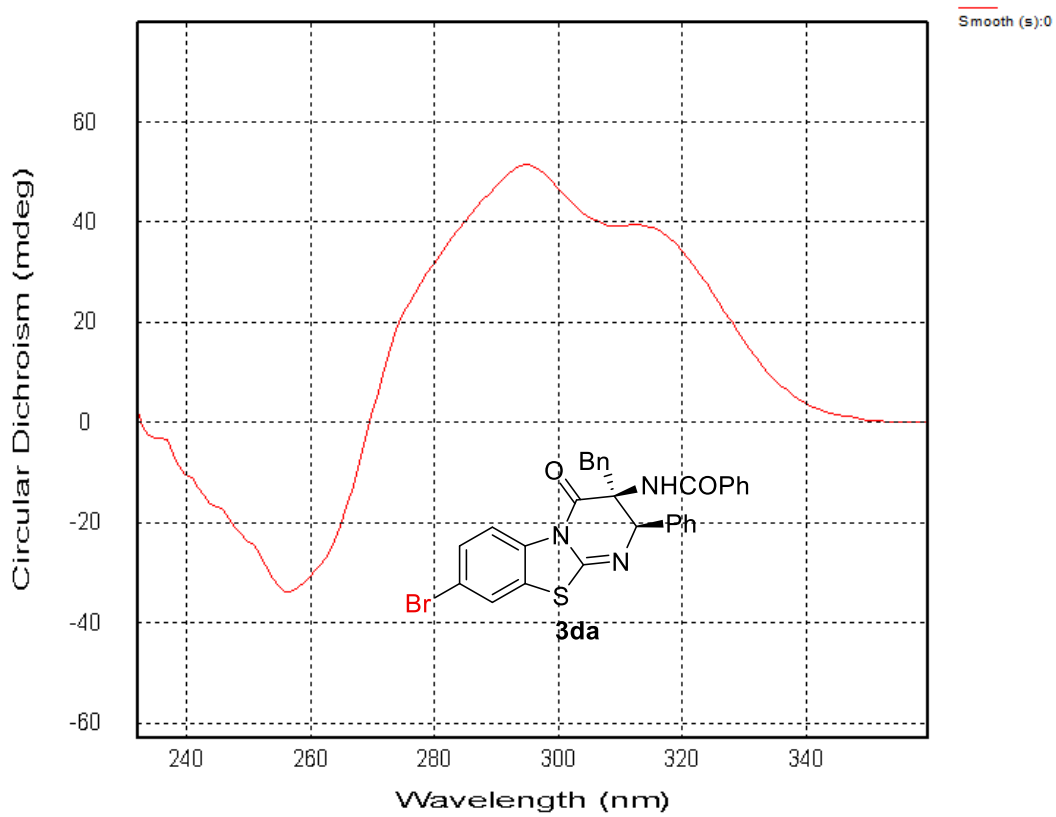

Figure S86.



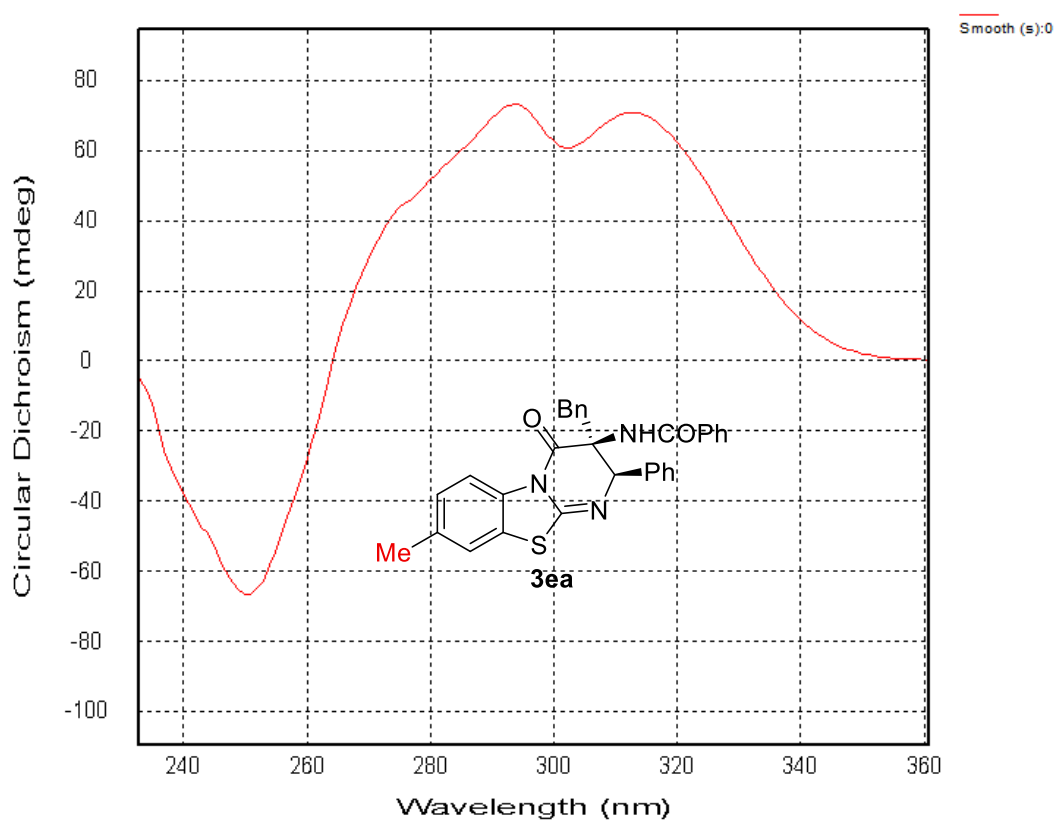

Figure S87.

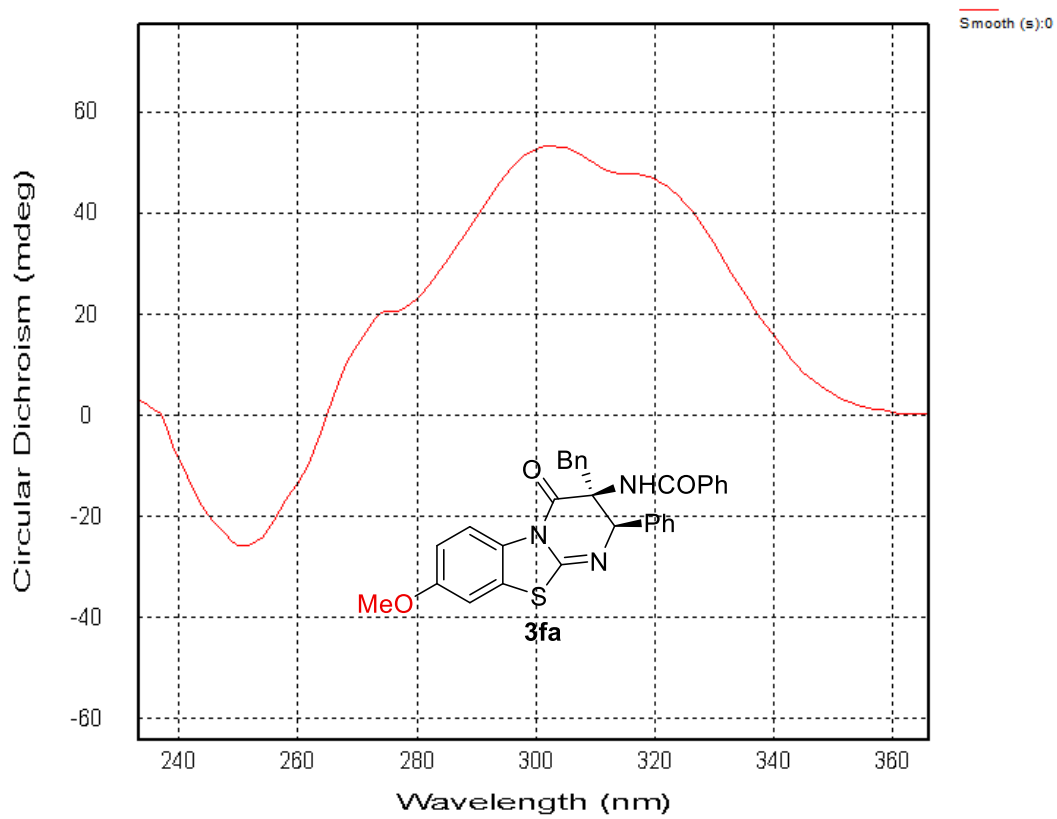

Figure S88.

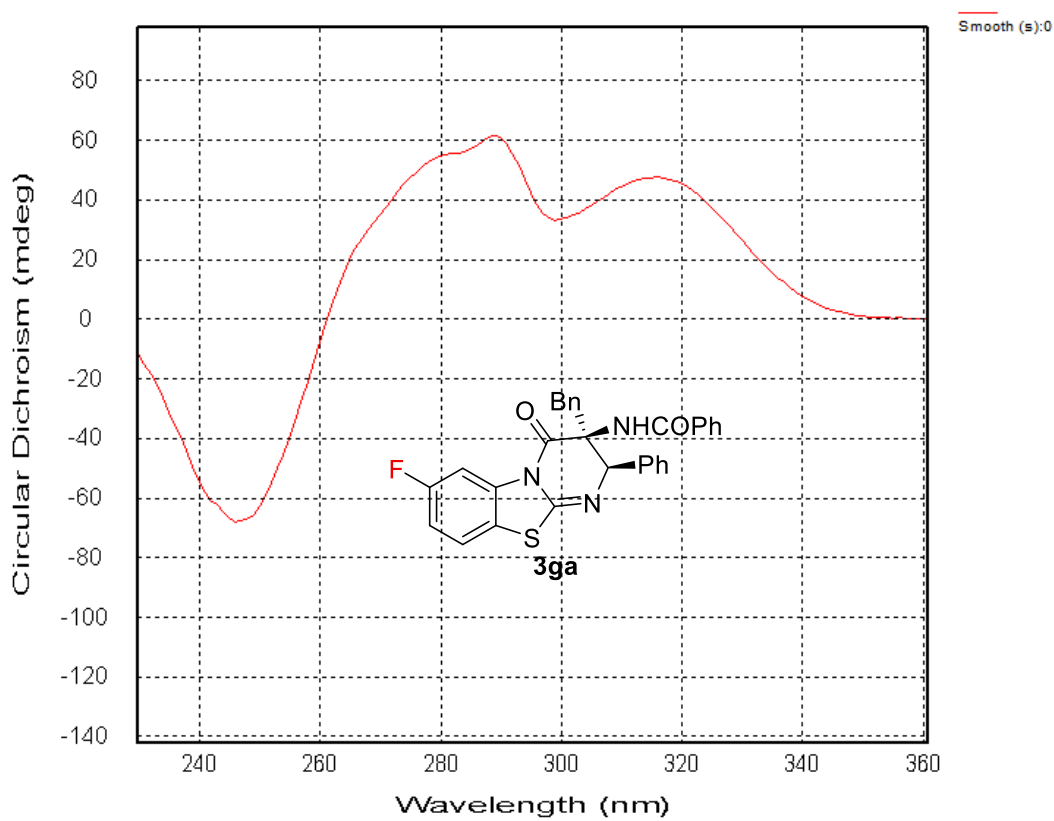

Figure S89.

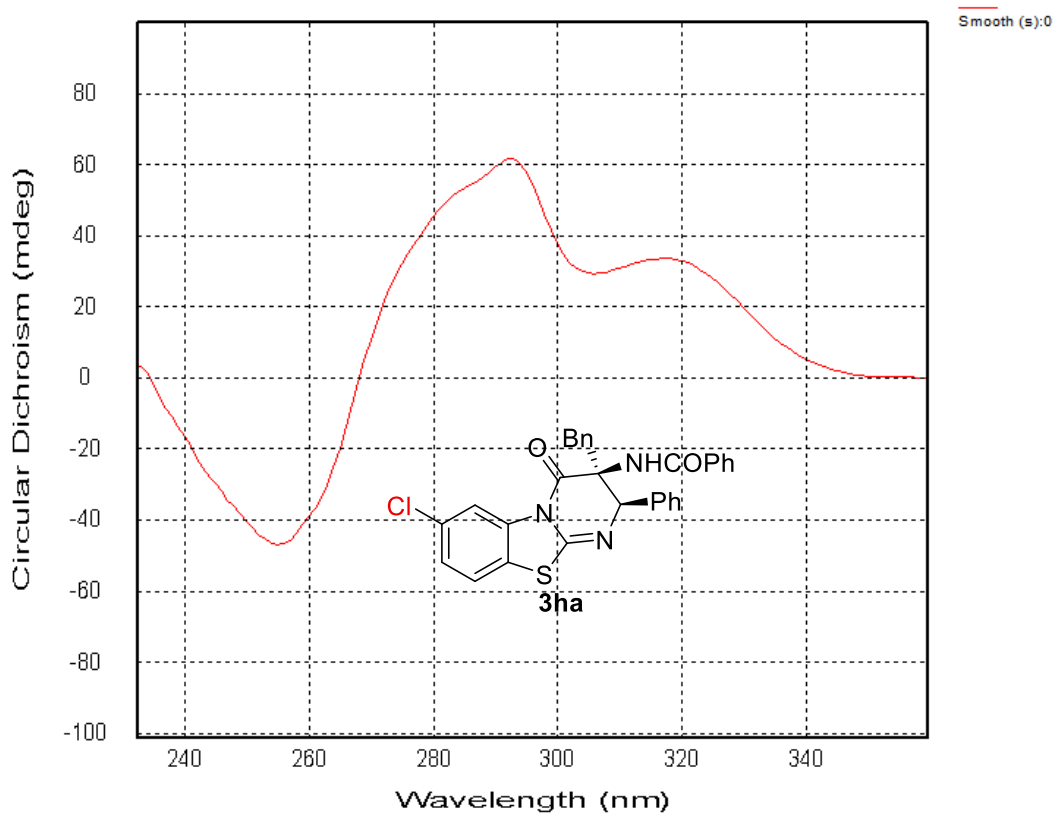

Figure S90.

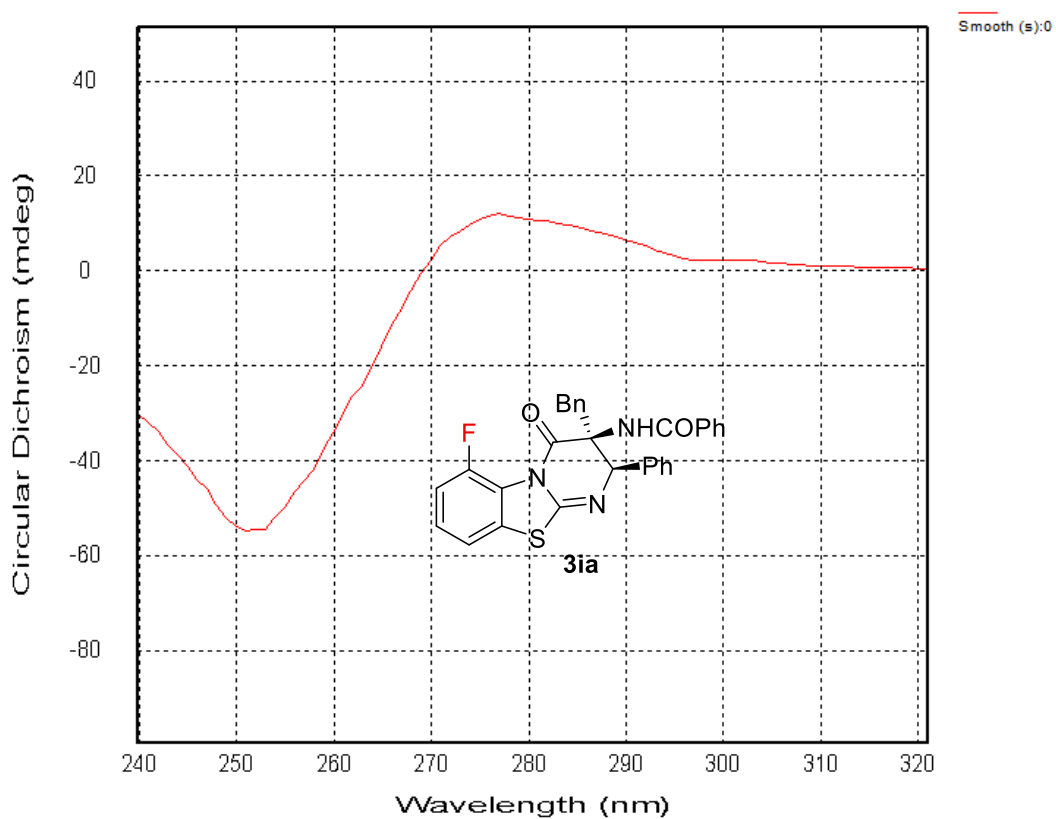

Figure S91.

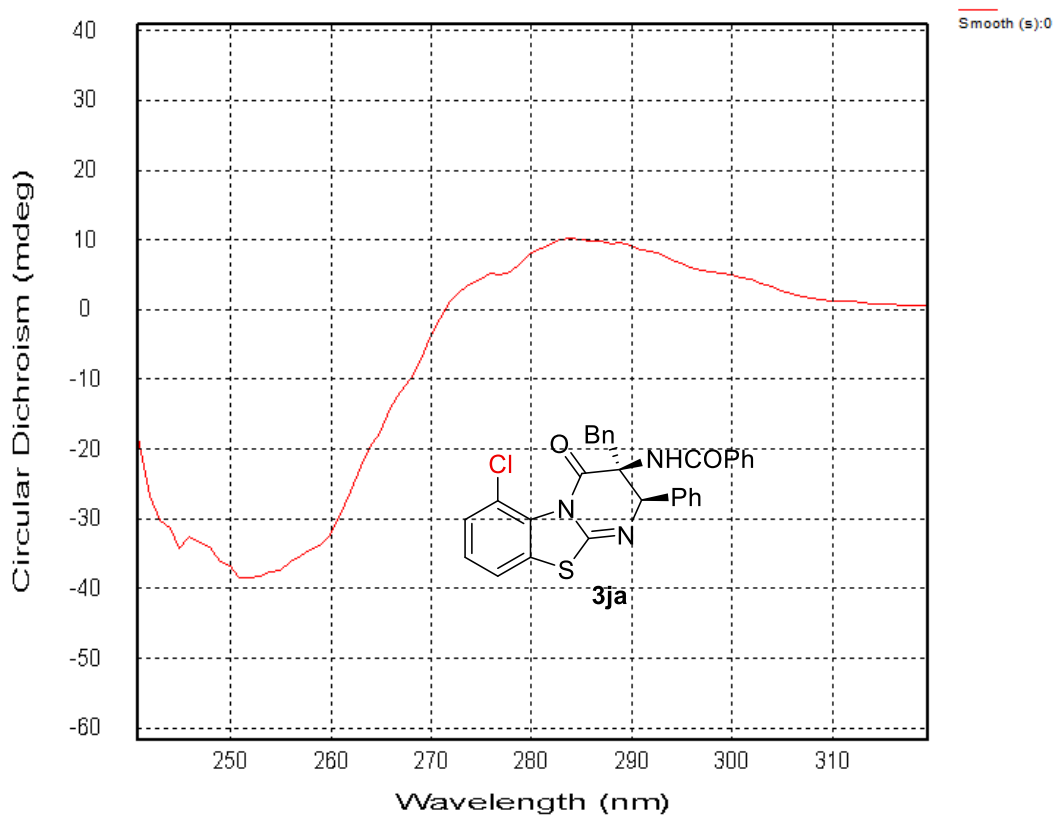

Figure S92.

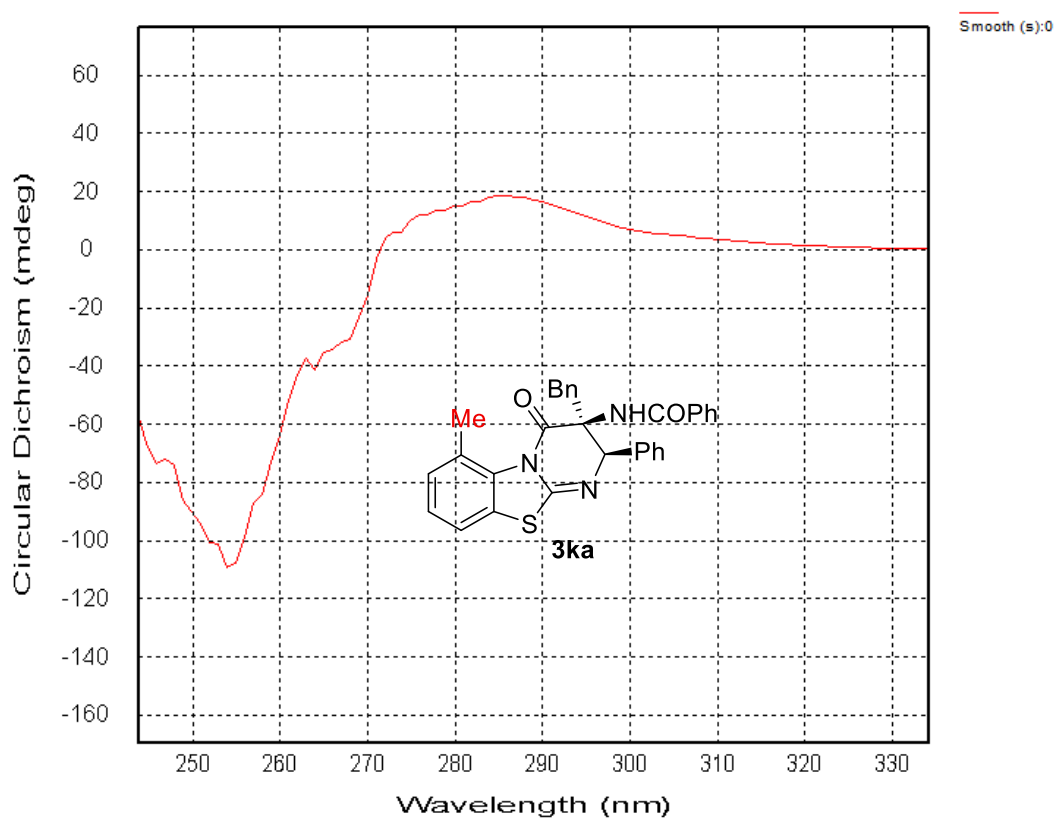

Figure S93.

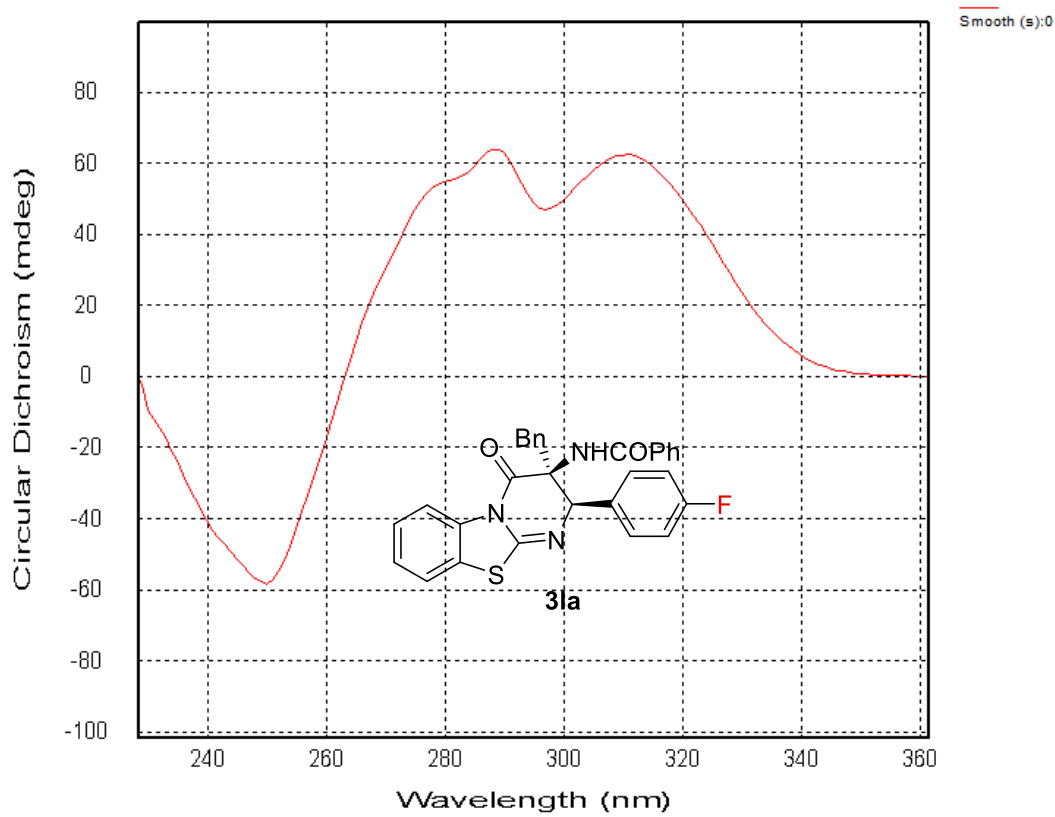

Figure S94.

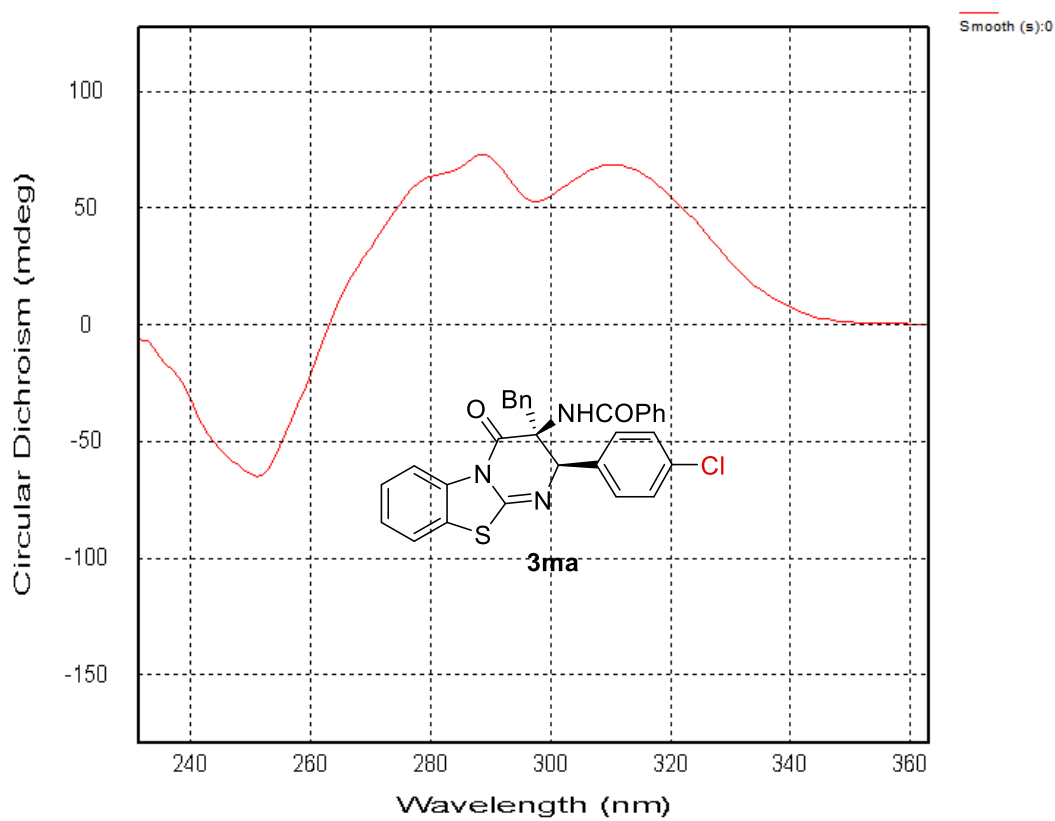

Figure S95.

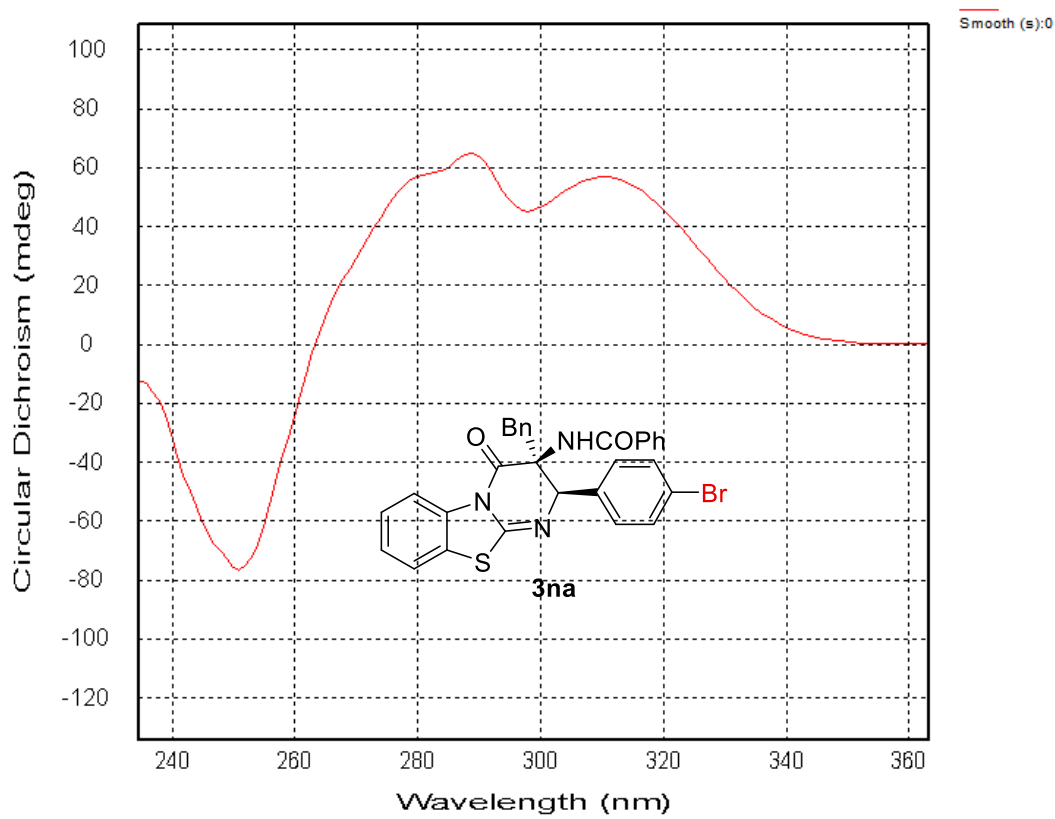

Figure S96.

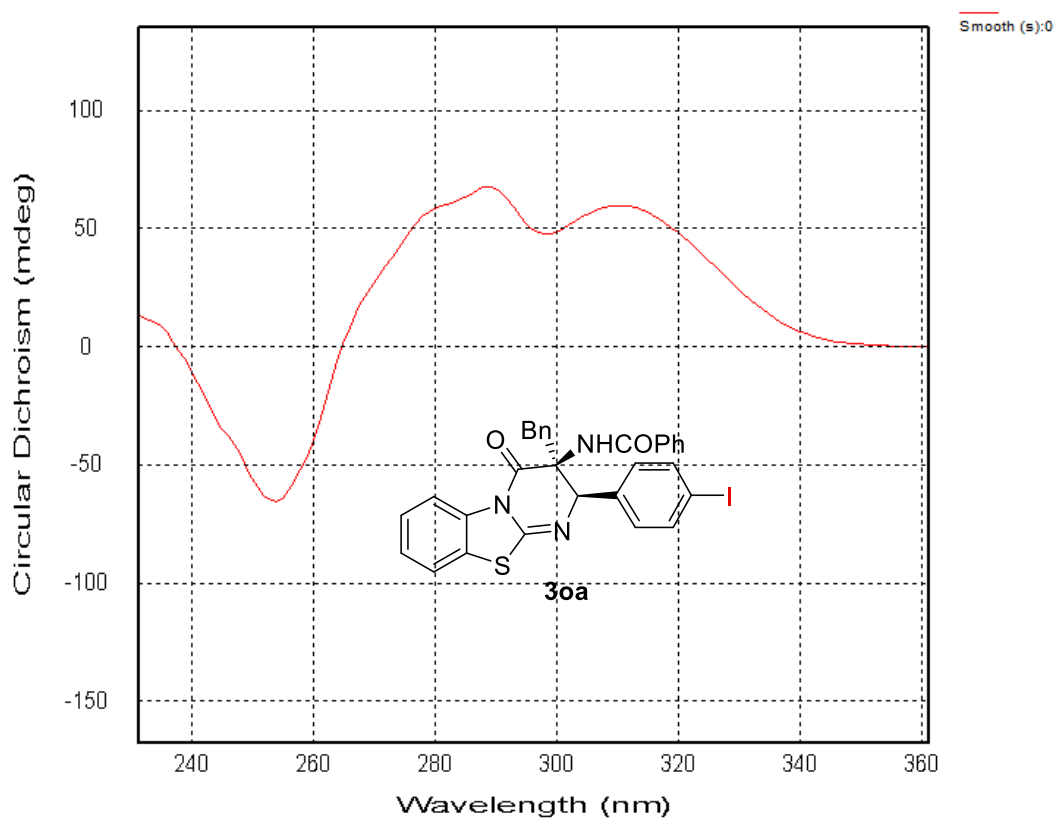

Figure S97.

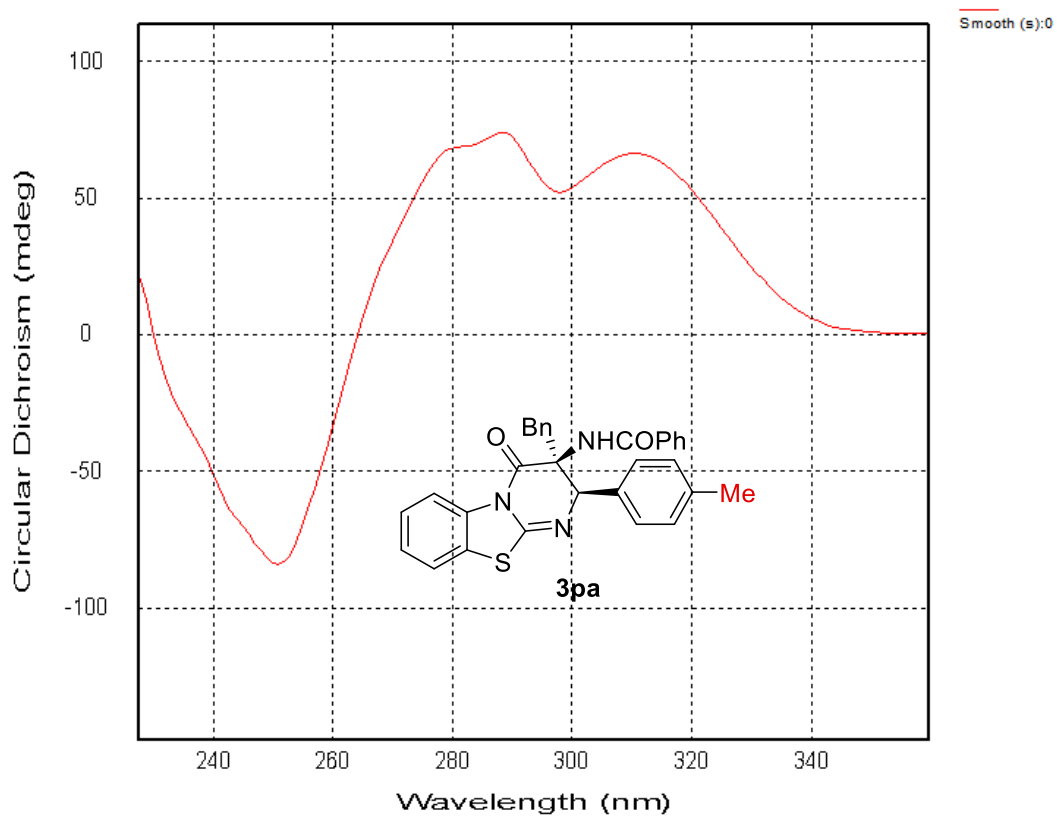

Figure S98.

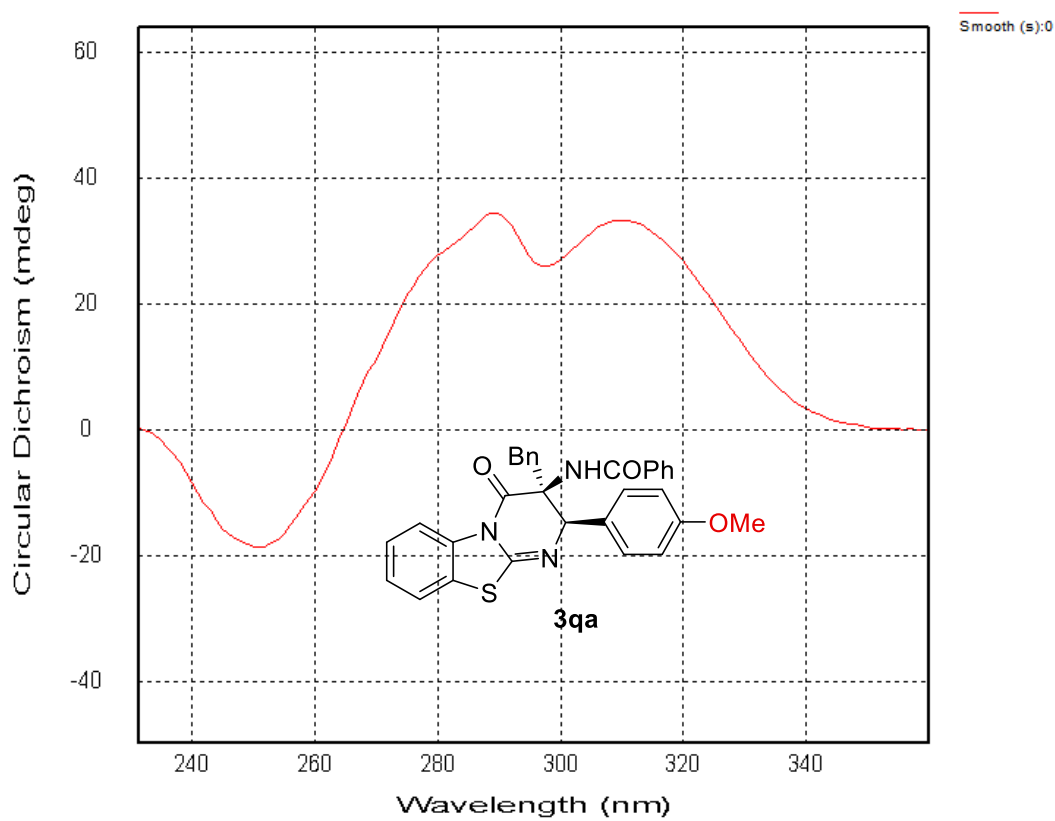

Figure S99.

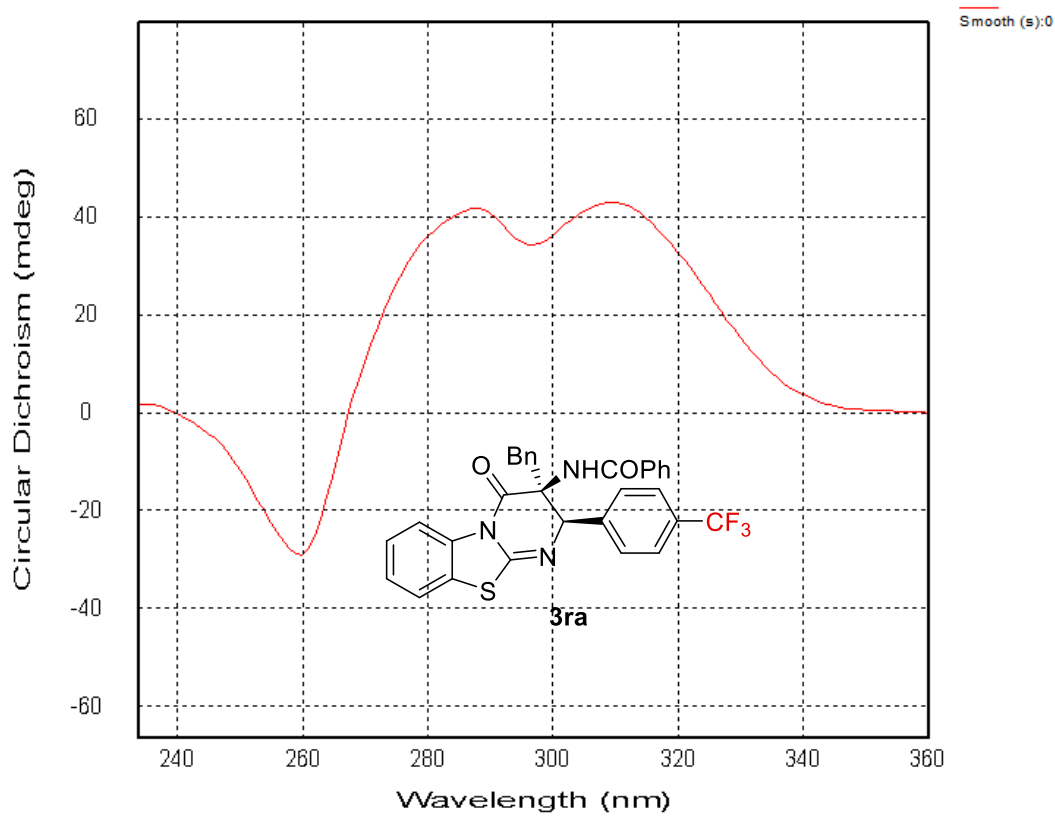

Figure S100.

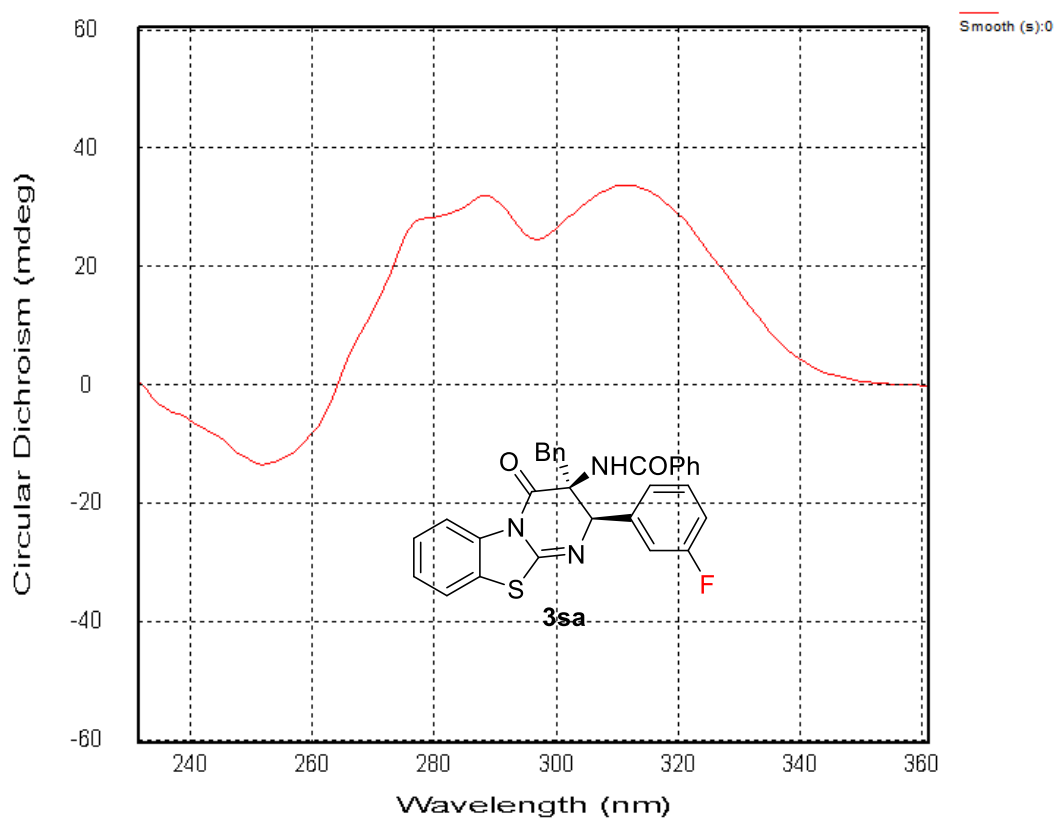

Figure S101.

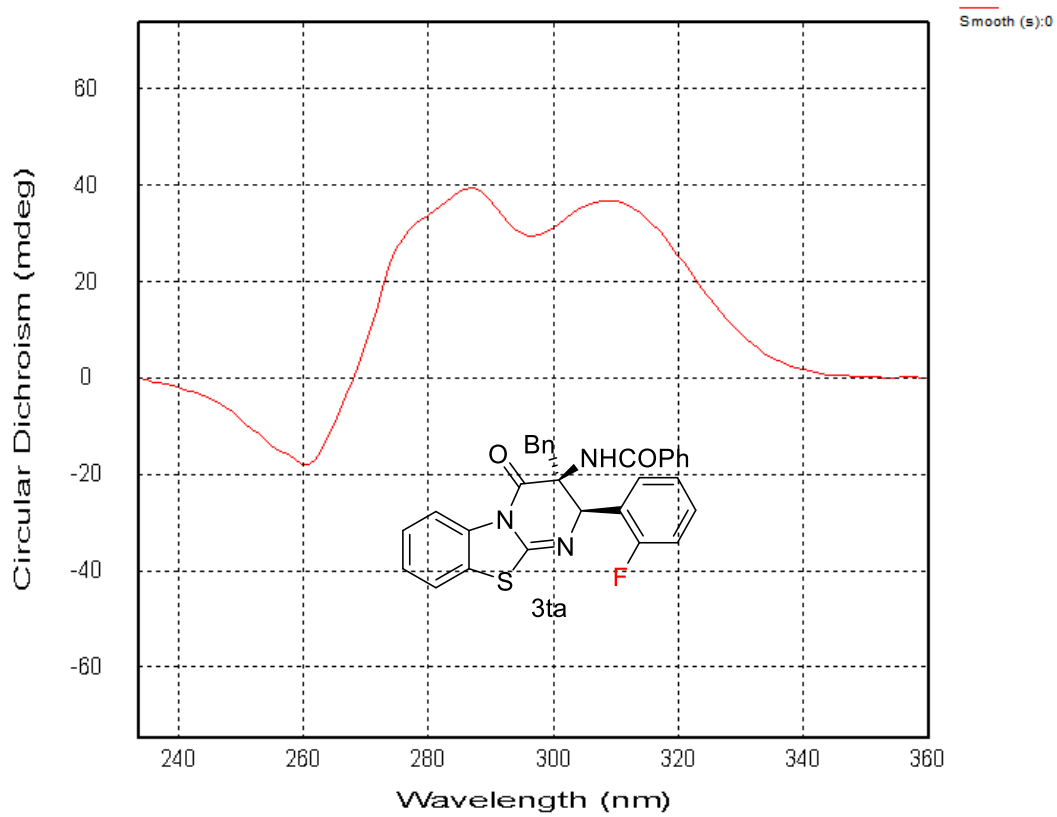

Figure S102.



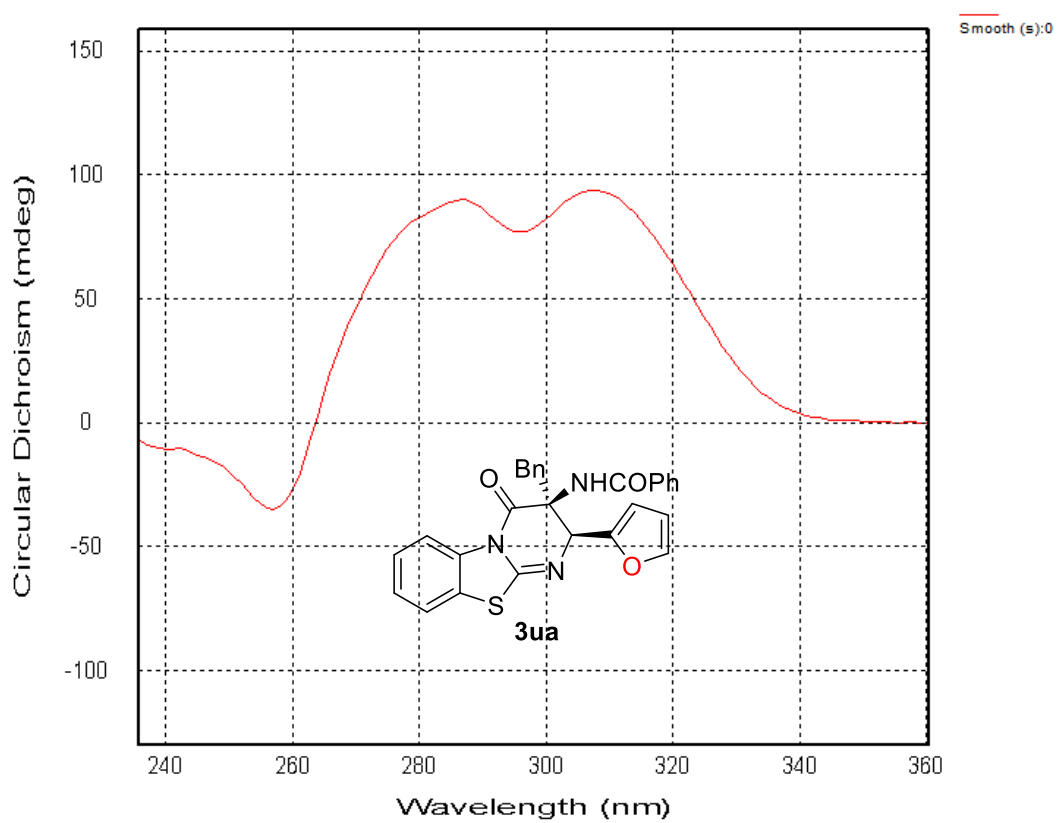

Figure S103.

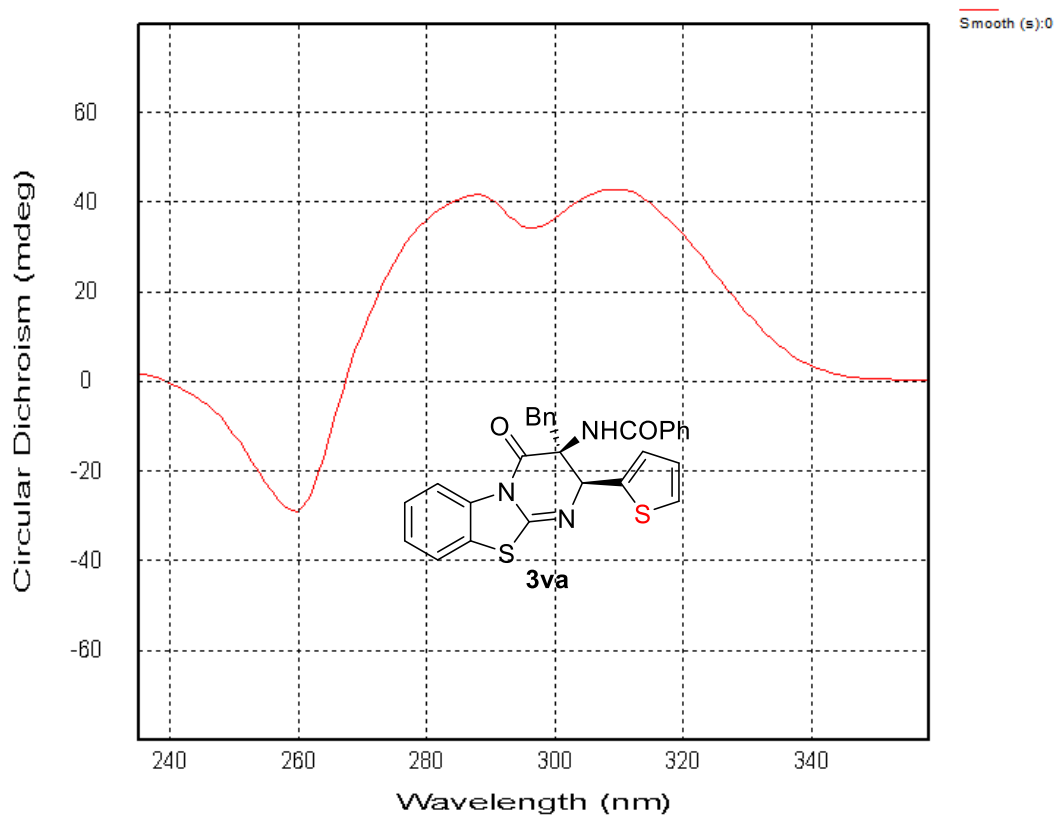

Figure S104.

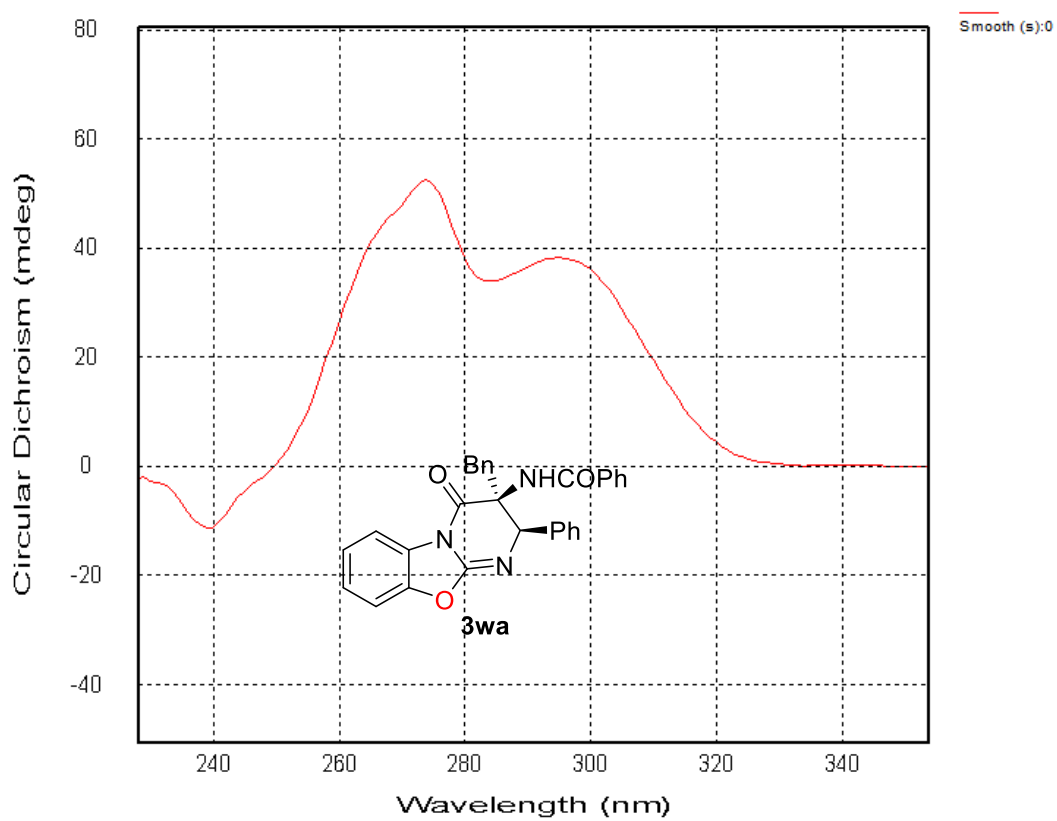

Figure S105.

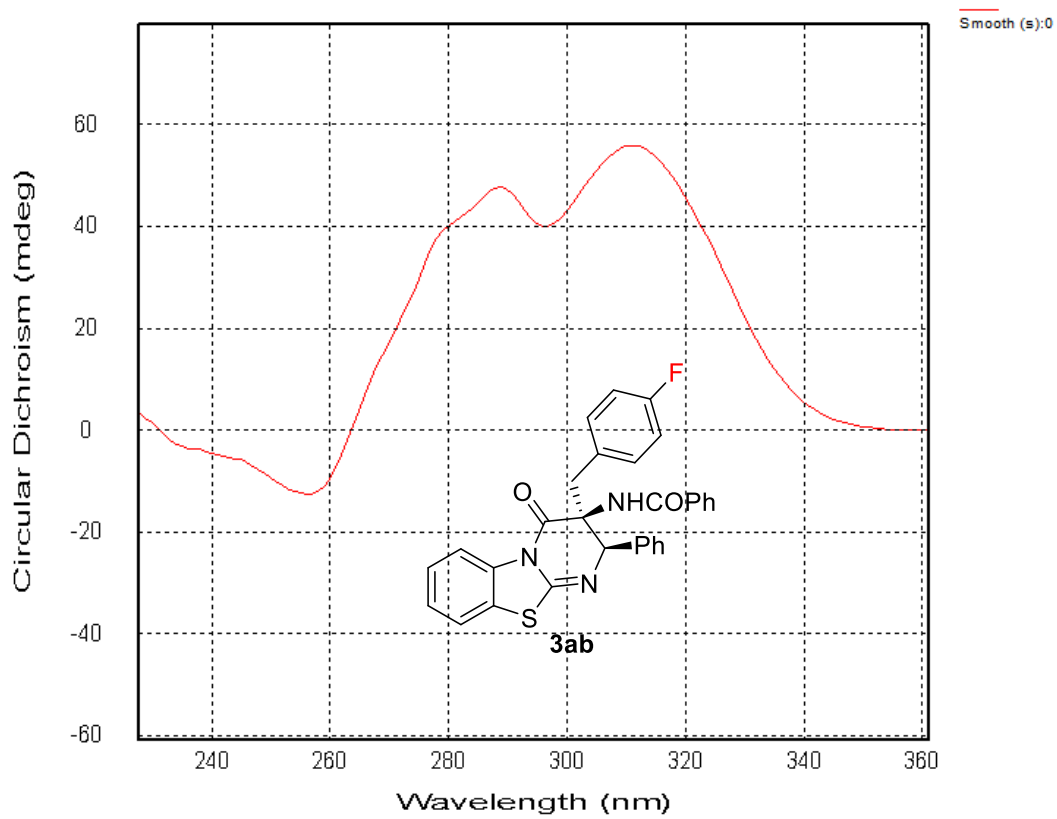

Figure S106.

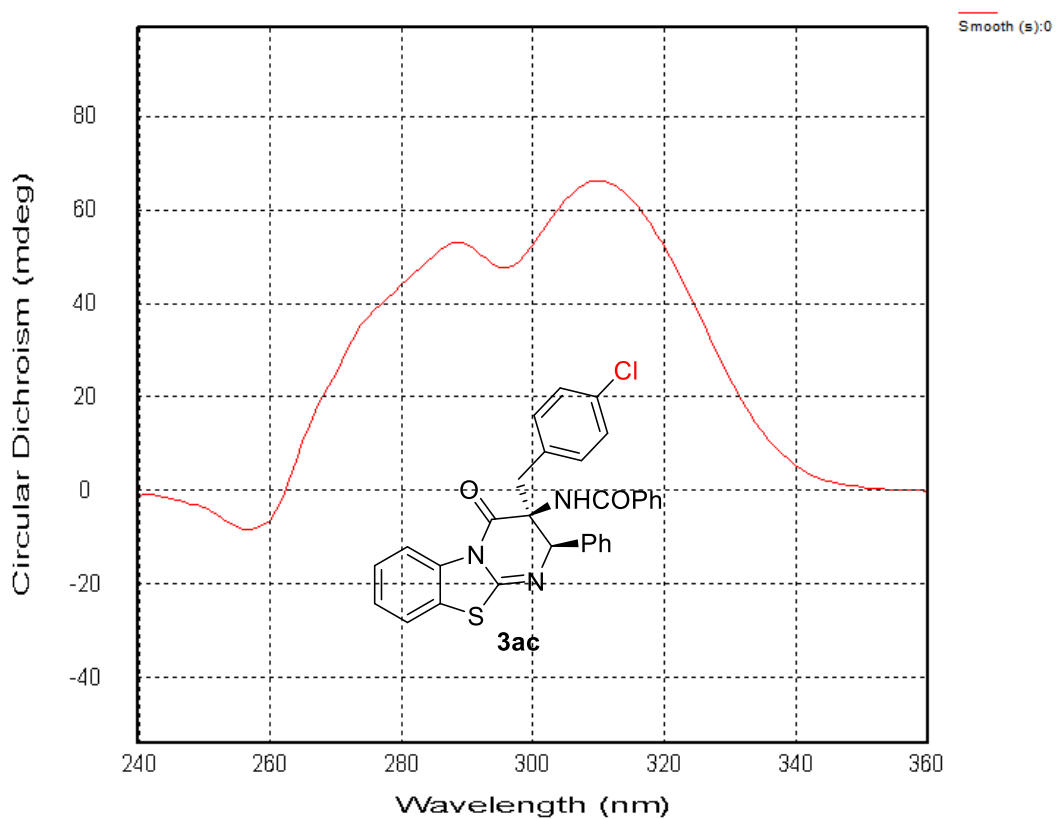

Figure S107.

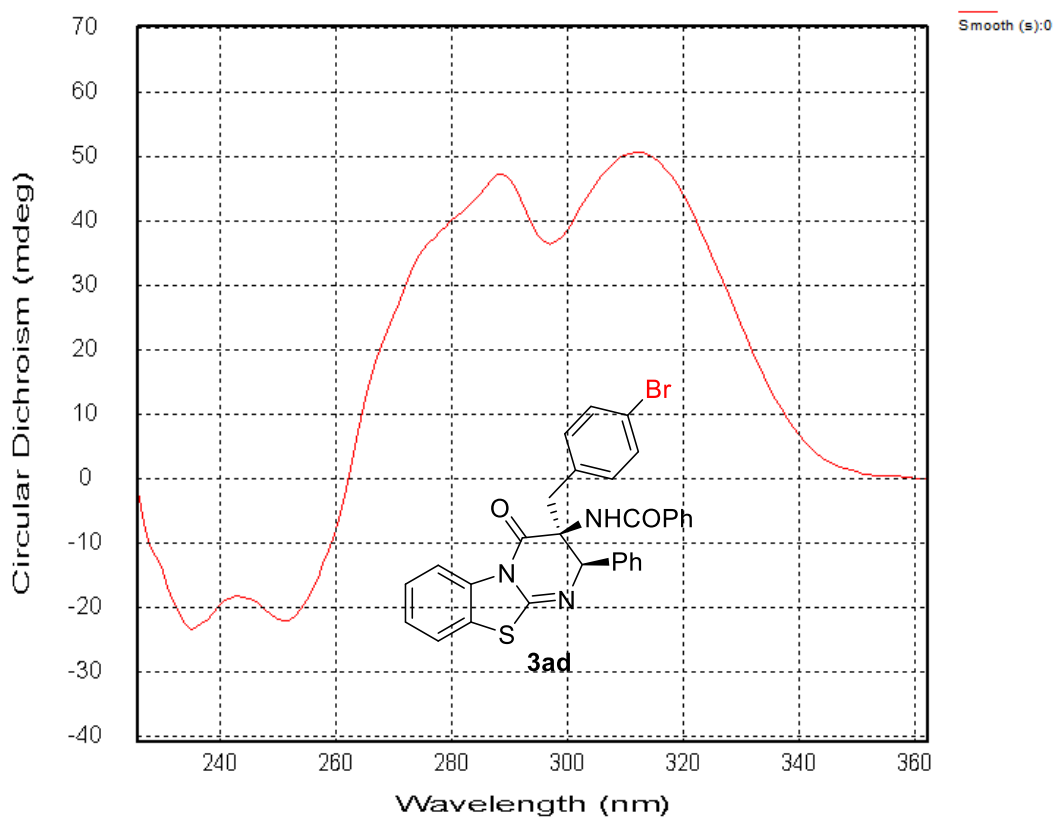

Figure S108.

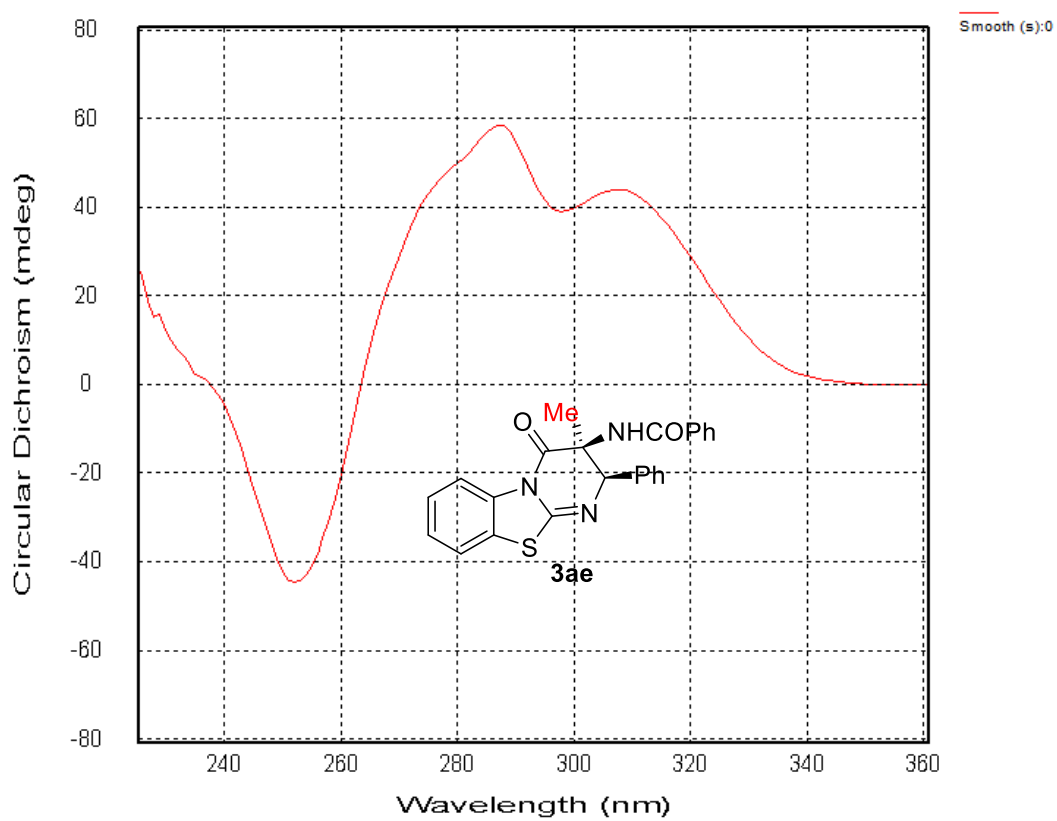

Figure S109.

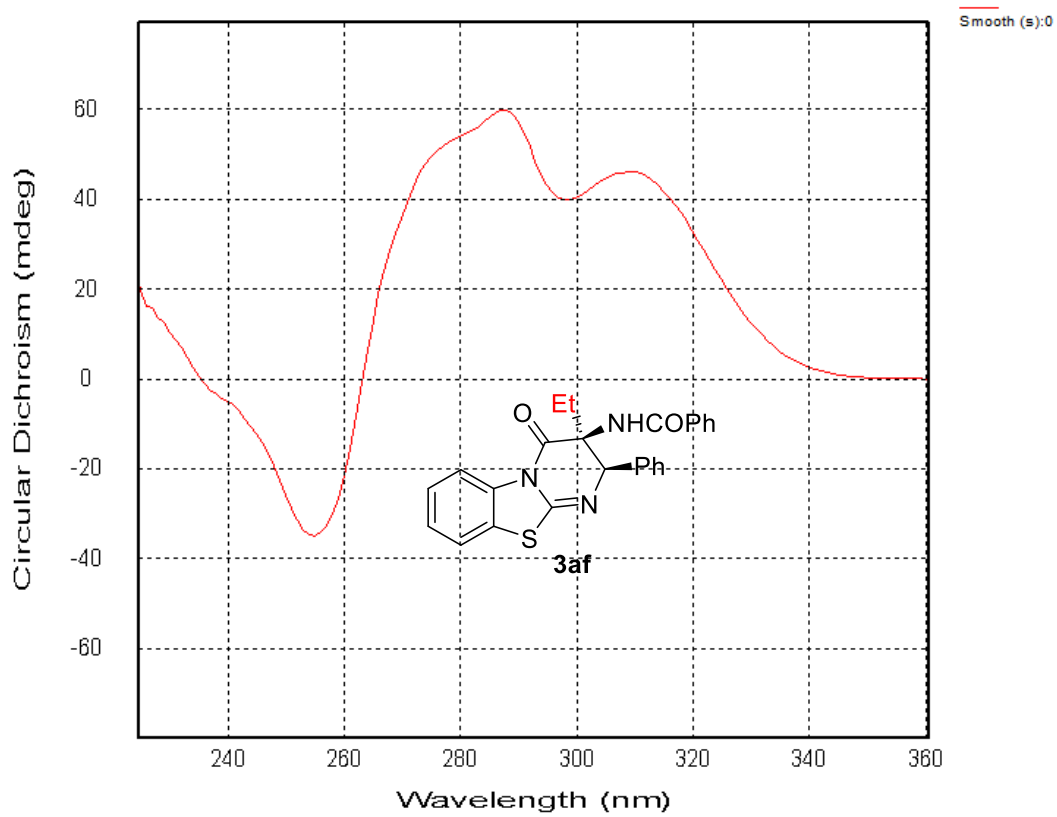

Figure S110.

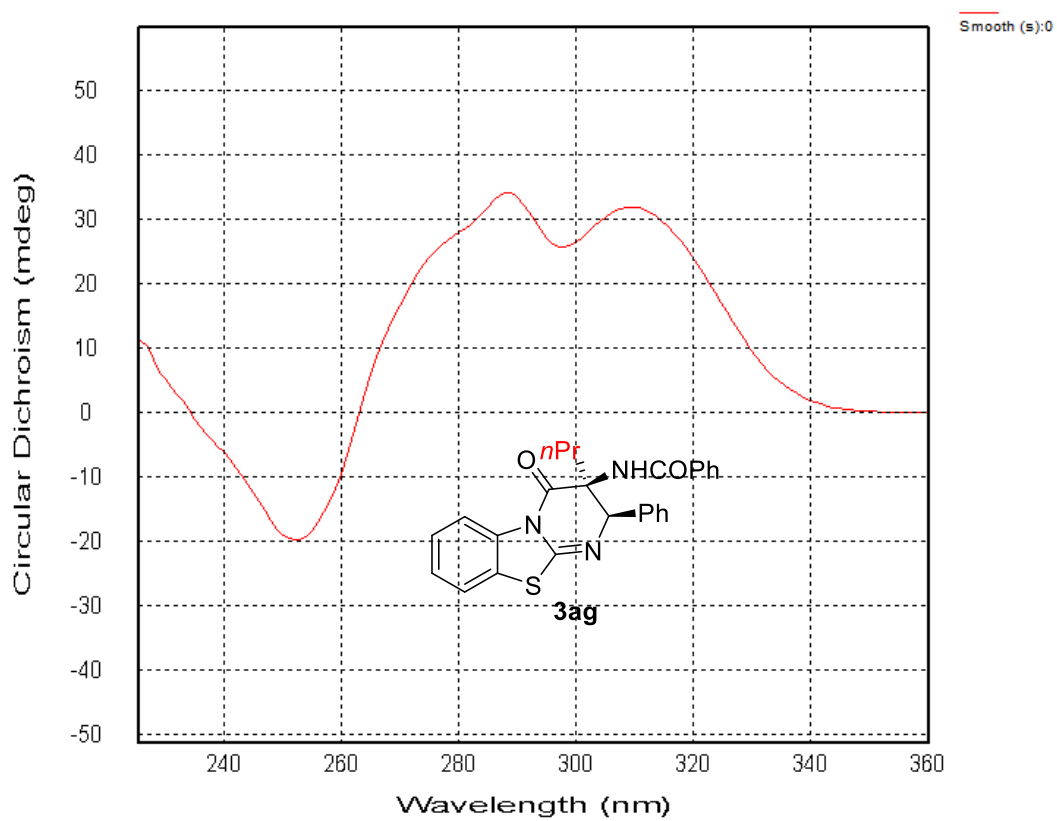

Figure S111.

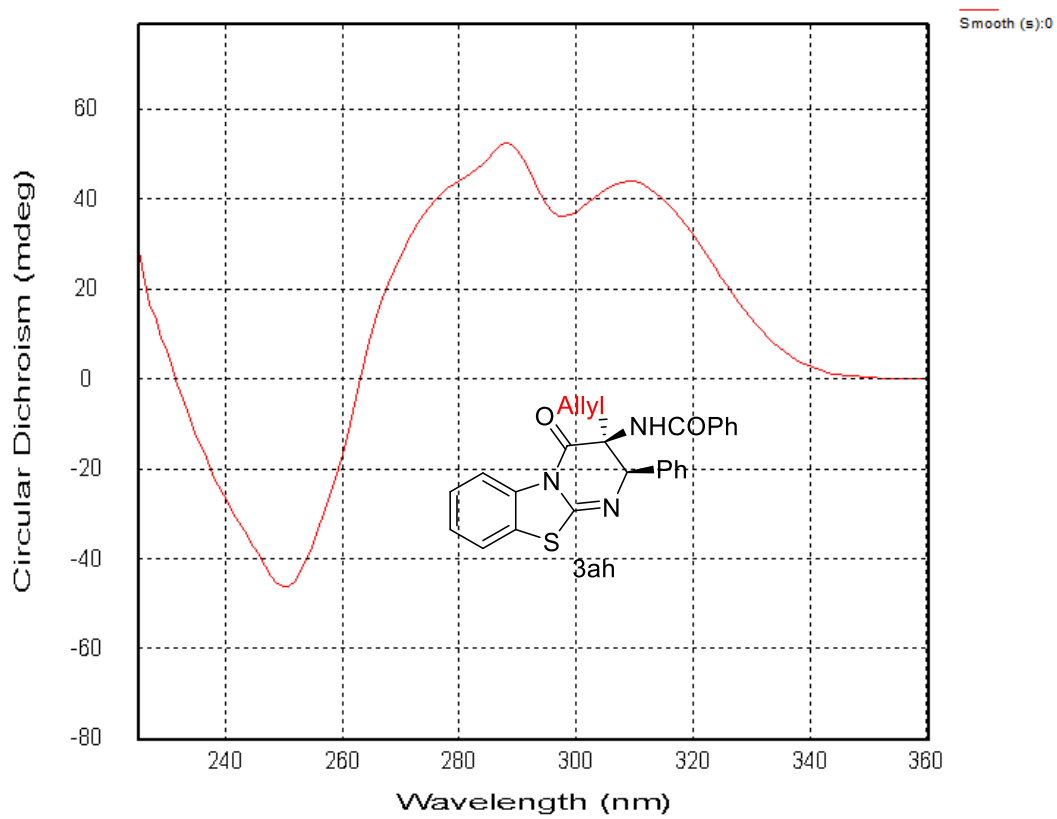

Figure S112.

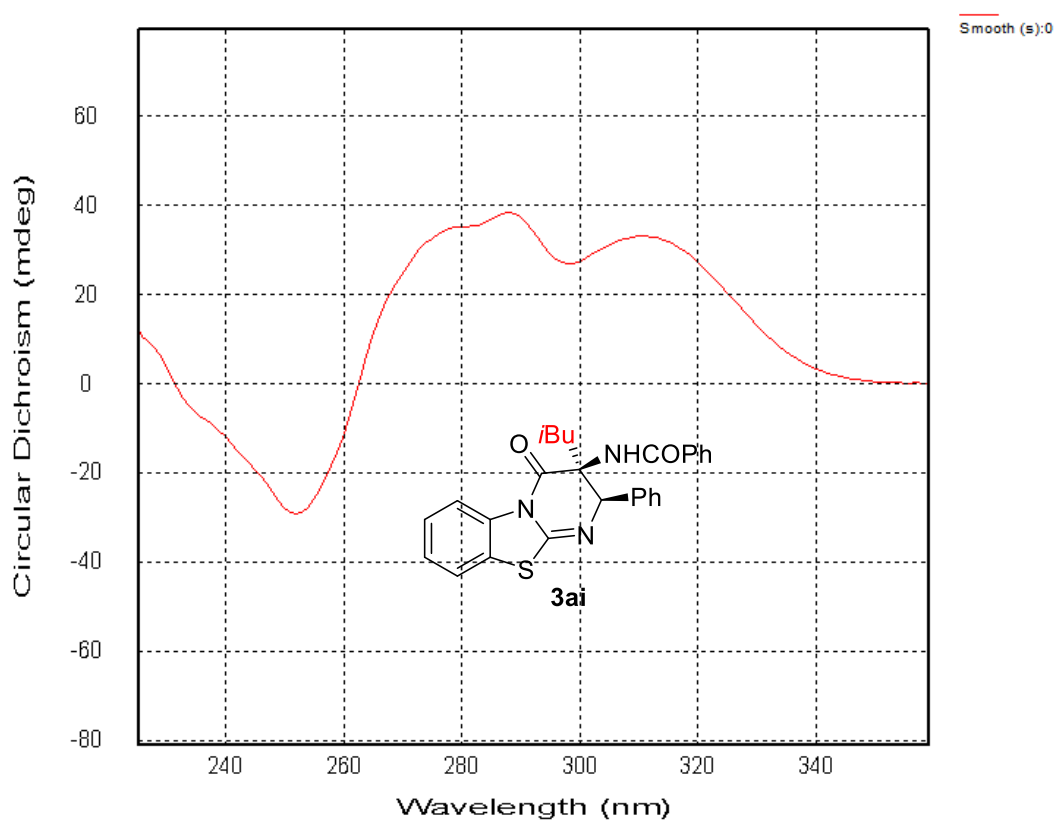

Figure S113.

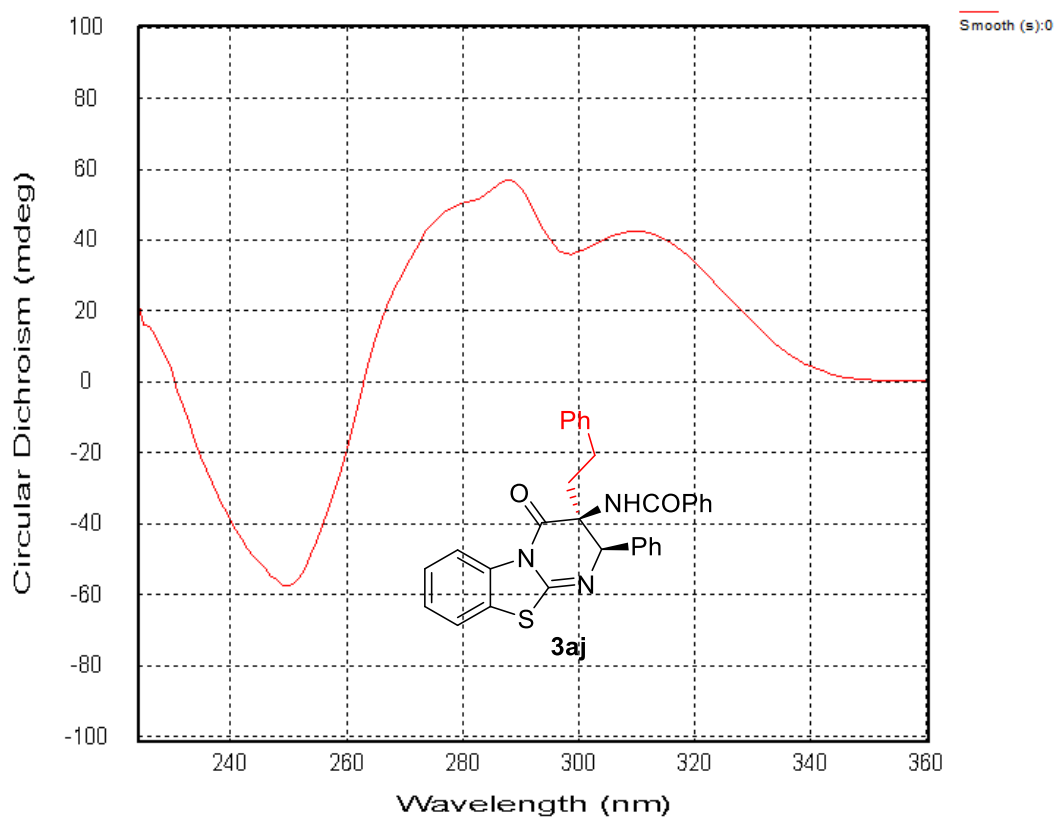

Figure S114.

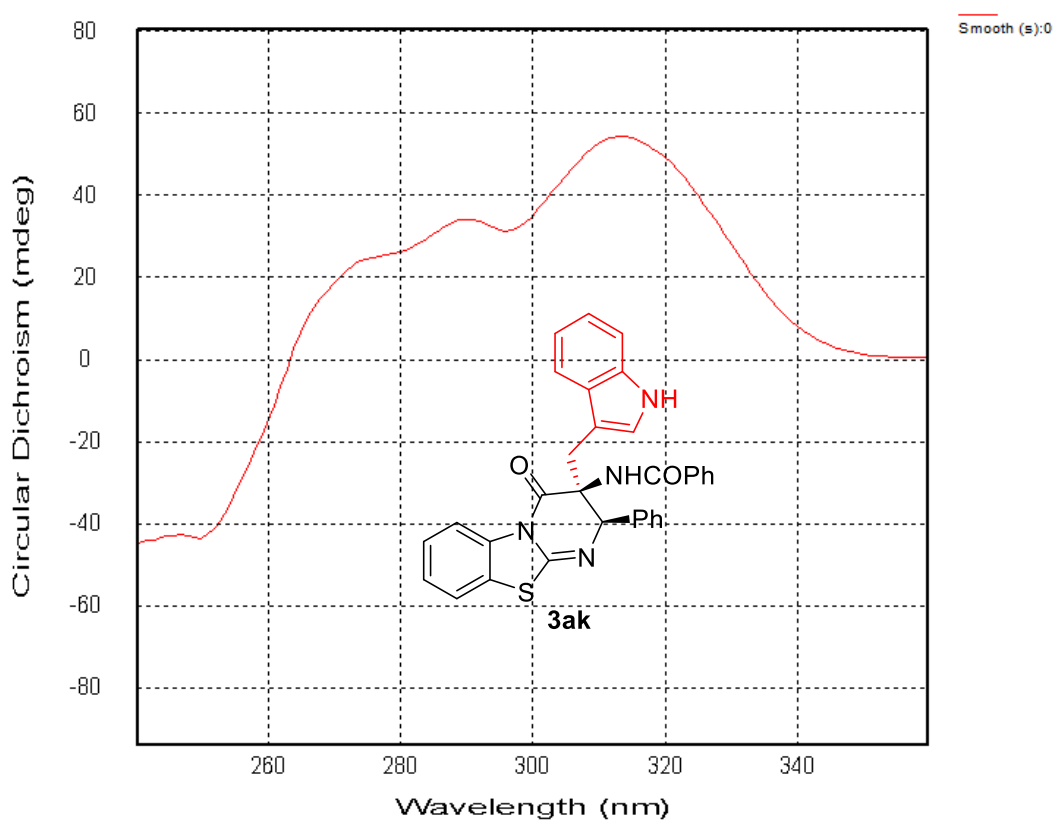

Figure S115.

## 11. Unsuccessful substrate scope

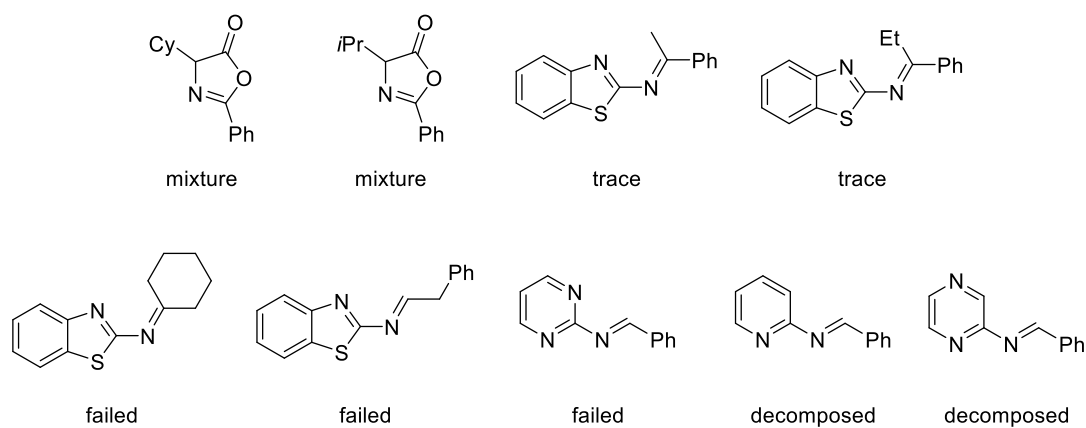

## 12. Reference

- (1) (a) S. X. Dong, X. H. Liu, X. H. Chen, F. Mei, Y. L. Zhang, B. Gao, L. L. Lin and X. M. Feng, *J. Am. Chem. Soc.*, **2010**, *132*, 10650–10651; (b) K. A. Teegardina and J. D. Weaver, *Chem. Commun.*, 2017, **53**, 4771–4774.
- (2) Q. J. Ni, X. Y. Wang, F. F. Xu, X. Y. Chen and X. X. Song, *Chem. Commun.*, 2020, **56**, 3155–3158.
- (3) Z. P. Yu, X. H. Liu, L. Zhou, L. L. Lin, X. M. Feng, *Angew. Chem., Int. Ed.*, 2009, **48**, 5195–5198.
